# Supplementary material for: Metallaphotoredox-catalyzed C–H activation: regio-selective annulation of allenes with benzamide
Source: Royal Society of Chemistry journal article supplement (doi:10.1039/d0qo01127d), 2021-01-01

## Supporting Information

# Metallaphotoredox-Catalyzed C–H Activation: Regio-Selective Annulation of Allenes with Benzamide

Tianlei Li<sup>a,b,†</sup>, Jishun Li<sup>a,b,c,†</sup>, Zihao Zhu<sup>a</sup>, Yuyuan Chen<sup>a</sup>, Xueyao Li<sup>a</sup>, Qingyun Yang<sup>a</sup>,  
Jie Xia<sup>a</sup>, Wenxuan Zhang<sup>a</sup>, Chao Zhang<sup>d\*</sup>, Weidong Pan<sup>b\*</sup>, Song Wu<sup>a\*</sup>

a. State Key Laboratory of Bioactive Substance and Function of Natural Medicines, Institute of Materia Medica, Peking Union Medical College and Chinese Academy of Medical Sciences, Beijing, 100005, China; b. State Key Laboratory of Functions and Applications of Medicinal Plants, Guizhou Medical University, Guiyang 550014, China; c. Guizhou University of Traditional Chinese Medicine Huaxi University town, Guiyang, Guizhou, 550025, China; d. Biodesign Center for BioEnergetics and School of Molecular Sciences, Arizona State University, Tempe, Arizona 85287, United States.

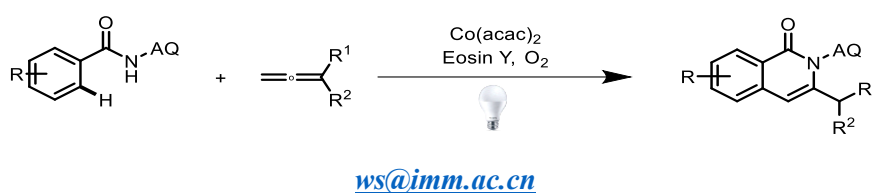

| NO | Table of Contents                                 | Page   |
|----|---------------------------------------------------|--------|
| 1  | Materials and Methods                             | 2      |
| 2  | Benzamides substrates                             | 2-3    |
| 3  | Allenes substrates                                | 4-6    |
| 4  | KIE study                                         | 6-9    |
| 5  | Isolation of Co(III) intermediate                 | 9-10   |
| 6  | General procedure                                 | 11     |
| 7  | Gram-scale and X-ray                              | 11-20  |
| 8  | Date of products                                  | 21-39  |
| 9  | Refence                                           | 40     |
| 10 | <sup>1</sup> H -NMR/ <sup>13</sup> C -NMR Spectra | 41-132 |

## Materials and Methods:

Unless otherwise indicated, all solvents and organic reagents were obtained from commercially available sources and were used without further purification. Silica gel was used for column chromatography and was performed with 60 A mesh standard grade silica gel. The reaction process was monitored using thin layer chromatography (TLC) with silica gel plates (thickness = 0.20 mm, GF254) under UV light and LC-MS (Waters Acquity UPLC/ SQD). Mass spectra was obtained using a Waters Acquity UPLC-SQD mass spectrometer. High resolution mass spectra (HRMS) were recorded on an Agilent Technologies LC/MSD TOF spectrometer.  $^1\text{H}$  NMR spectra was recorded on a Varian Mercury-400 or 500 MHz instrument, and  $^{13}\text{C}$  NMR spectra was recorded at 400 or 500 MHz on a Varian Mercury using  $\text{CDCl}_3$  as a solvent and tetramethylsilane (TMS) as an internal standard. Chemical shifts are reported in parts per million relative to  $\text{CDCl}_3$  (d, 7.26),  $\text{CD}_3\text{OD}$  (d, 3.31) and  $\text{DMSO-d}_6$  (d, 2.50) for  $^1\text{H}$  NMR and relative to  $\text{CDCl}_3$ ,  $\text{CD}_3\text{OD}$  and  $\text{DMSO-d}_6$  for  $^{13}\text{C}$  NMR with TMS as an internal standard. Abbreviations used for  $^1\text{H}$  NMR splitting are as follows: s = singlet, brs = broad singlet, d = doublet, dd = doublet of doublets, t = triplet, q = quartet, m = multiplet, br m = broad multiplet.

## Benzamides substrates:

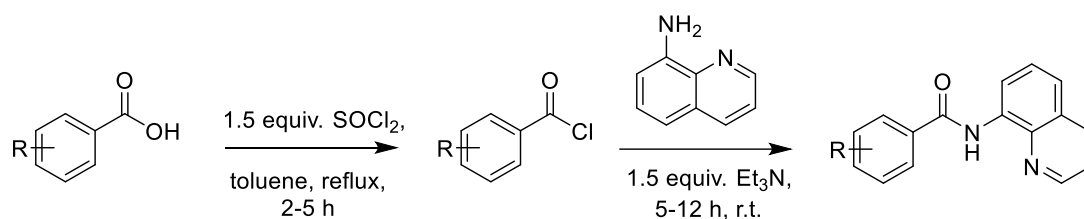

A 100 mL round bottom flask was charged with carboxylic acid (15 mmol) to which thionyl chloride (30 mmol) was added dropwise under flow of argon at ice cold water in dry toluene as solvent. The reaction mixture was refluxed at 110 °C for 2-5 h, then the excess  $\text{SOCl}_2$  was removed in vacuum to afford the crude acid chloride on one hand, whereas in another flask solution of 8-aminoquinoline (10 mmol) and  $\text{Et}_3\text{N}$  (22.5 mmol) in dichloromethane (30 mL) was stirred for 30 minutes. Deprotonated amine was added to a solution of acid chloride at 0°C. The reaction was allowed to warm to room temperature and stirred overnight (5-12 h) for complete conversion. Upon completion, it was quenched with saturated  $\text{NaHCO}_3$  solution and extracted with  $\text{CH}_2\text{Cl}_2$  three times. These extracts were combined and dried over anhydrous  $\text{Na}_2\text{SO}_4$ . Solvent was evaporated and the corresponding crude amide product was purified by flash column chromatography (Hexane: ethyl acetate 10:1) through silica gel.

| Compound ID | Structure | Compound ID | Structure |
|-------------|-----------|-------------|-----------|
| 1a          |           | 1k          |           |
| 1b          |           | 1l          |           |
| 1c          |           | 1m          |           |
| 1d          |           | 1n          |           |
| 1e          |           | 1o          |           |
| 1f          |           | 1p          |           |
| 1g          |           | 1q          |           |
| 1h          |           | 1u          |           |
| 1i          |           | 1s          |           |
| 1j          |           |             |           |

## Allenes substrates:

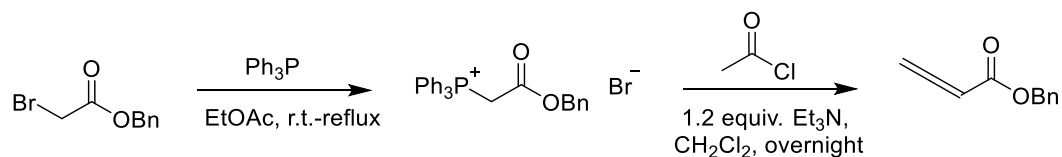

A number of these compounds are known and we follow the general procedure illustrated for the synthesis of buta-2,3-dienoate, the detail procedure was as following<sup>1,4-8</sup>:

Triphenyl phosphine (26.2 g, 100 mmol) and methyl bromoacetate (10.4 mL, 1.1 equiv. 110 mmol) dissolved in 400 mL ethyl acetate, was refluxed overnight to produce a white solid which was removed by suction filtration and wash with cold ethyl acetate. The filter cake was dried over 60 °C at the reduce pressure, gave methoxycarbonyl methyl triphenylphosphonium bromide (44.6 g, 91%).

Benzyl(triphenylphosphoranylidene)acetate (19.6 g, 40 mmol) was dissolved in CH<sub>2</sub>Cl<sub>2</sub> (210 mL) in a three-necked, round-bottomed flask under nitrogen. The solution was stirred at 0 °C as solution of Et<sub>3</sub>N (6.65 mL, 48.0 mmol, 1.2 equiv.) in CH<sub>2</sub>Cl<sub>2</sub> (50 mL) was added dropwise (10 min). After 30 min, acetyl chloride (2.84 mL, 40 mmol, 1.0 equiv.) in CH<sub>2</sub>Cl<sub>2</sub> (20 mL) was added dropwise over a period of 30 min. After addition, the reaction was allowed to warm to room temperature. The reaction was stirring overnight, and the clear, slight yellow solution was evaporated on a rotary evaporator at reduced pressure. A portion of ether (200 mL) was added to the residue and the slurry was allow to stand for 1 hour while it was shaken periodically to facilitate solidification. The precipitate was removed by filtration and the solid was washed with ether (50 × 2 mL). The filtrates were combined and solvent was evaporated. The mixture was purified by chromatography (PE: EtOAc = 100:0-90:10) afforded the desired product (5.6, 80%) as a colorless oil. <sup>1</sup>H NMR (400 MHz, CDCl<sub>3</sub>) δ 7.42-7.28 (m, 5H), 5.69 (t, *J* = 6.4 Hz, 1H), 5.25 (d, *J* = 6.4 Hz, 2H), 5.21 (s, 2H).

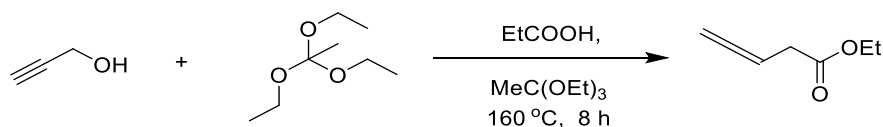

To a solution of propargylic alcohol (2.8 g, 50.0 mmol, 0.5 equiv.) and triethyl orthoacetate (19.3 mL, 17.1 g, 105.0 mmol, 1.05 equiv.) was dropwise added propionic acid (298.1 μL, 4.0 mmol, 4.0 mol%) at 100°C. The reaction mixture was then heated to 160°C and resulting EtOH was continuously distilled off under atmospheric pressure. After 2 h, another aliquot of propargylic alcohol (2.8 g, 50 mmol, 0.5



equiv.) was added and further heated for 3 h. After cooling to room temperature, the reaction was quenched by addition of HCl (2 M, 100 ml). The phases were separated, the aqueous phase was extracted with Et<sub>2</sub>O (3×100 ml) and the combined organic layers were washed with Brine, dried over Na<sub>2</sub>SO<sub>4</sub>, filtrated and concentrated under reduced pressure. The crude product was purified by chromatography (PE: Ether= 100:0-90:10) afforded the desired product (4.5, 35%)<sup>2</sup> as a colorless liquid. <sup>1</sup>H-NMR(400 MHz, CDCl<sub>3</sub>): δ= 5.28 (m, 1 H), 4.77 (dd, *J* = 3.0, 3.0 Hz, 1 H), 4.75 (dd, *J* = 3.0, 3.0 Hz, 1 H), 4.16 (q, *J* = 7.2 Hz, 2H), 3.04 (m, 2H), 1.27 (t, *J* = 7.2 Hz, 3H).

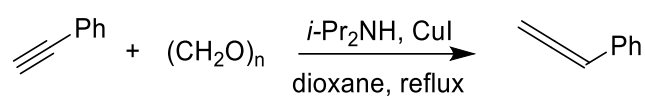

Paraformaldehyde (4.6 g, 2.5 equiv., 50.0 mmol), CuI (1.9 g, 0.5 equiv., 10 mmol), dioxane (75 mL), phenylacetylene (2.25 g, 1.0 equiv., 20 mmol), and diisopropylamine (5.6 mL, 2.0 equiv., 40.0 mmol) were added sequentially into an oven-dried reaction tube equipped with a reflux condenser under an argon atmosphere. The resulting mixture was stirred under reflux. When the reaction was complete as monitored by TLC, it was cooled to rt. Water (100 mL) and ether (100 mL) were added and then the aqueous solution was separated and extracted with ether (3 × 50 mL). The organic layer was then washed with brine and dried over anhydrous Na<sub>2</sub>SO<sub>4</sub>. Evaporation and column chromatography on silica gel (petroleum ether/Et<sub>2</sub>O) afforded propa-1,2-dien-1-ylbenzene (531.7 mg, 45%)<sup>3</sup>. <sup>1</sup>H NMR (400 MHz, CDCl<sub>3</sub>) δ 7.35-7.28 (m, 4H), 7.22-7.15 (m, 1H), 6.17 (t, *J* = 6.4 Hz, 1H), 5.14 (d, *J* = 7.0 Hz, 2H).

| Compound ID | Structure                                                                           | Compound ID | Structure                                                                             |
|-------------|-------------------------------------------------------------------------------------|-------------|---------------------------------------------------------------------------------------|
| 2a          | 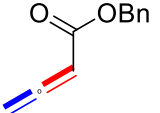 | 2b          |  |
| 2c          |  | 2d          |  |
| 2e          |  | 2f          |  |

|    |  |    |  |
|----|--|----|--|
| 2g |  | 2h |  |
| 2i |  | 2j |  |
| 2k |  | 2l |  |

### Deuteration experiments and KIE study<sup>9-10</sup>:

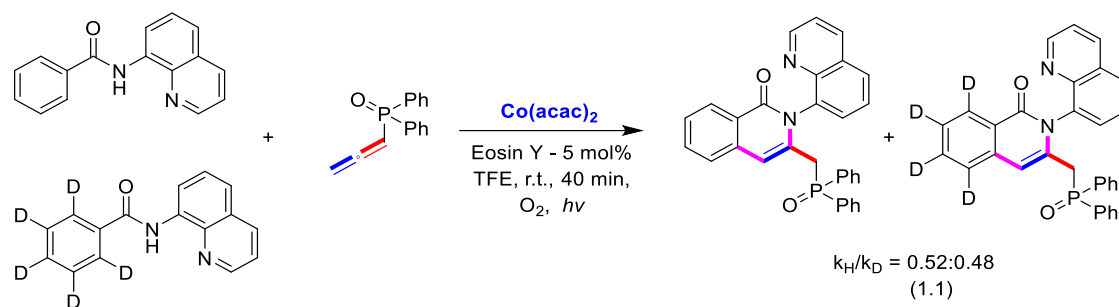

A sealed tube with a screw cap (PTFE) was charged with N-(quinoline-8-yl)benzamide (12.4 mg, 0.05 mmol) and N-(quinoline-8-yl)benzamide-2,3-4,5,6-d<sub>5</sub> (12.7 mg, 0.05 mmol), KOTf (3.76 mg, 20 mol%, 0.02 mmol), Co(acac)<sub>2</sub> (5.14 mmol, 20 mmol%, 0.02 mmol), Eosin Y (3.45 mg, 5 mol%, 0.005 mmol), and diphenyl(propa-1,2-dien-1-yl)phosphine oxide (48.0 mg, 2.0 equiv., 0.2 mmol) in 1.5 mL 2,2,2-trifluoroethanol under oxygen atmosphere. Then, the resulted solution was placed in 15 W white LED at room temperature for 40 min, and analyzed by TLC (petroleum ether: ethyl acetate =10:1, dichloromethane: acetone =80:20). Intermolecular deuterium labeled competition experiment gave [H:D] =1.08 value. The [H:D] was determined by <sup>1</sup>H-NMR spectroscopy analysis of the pure product.

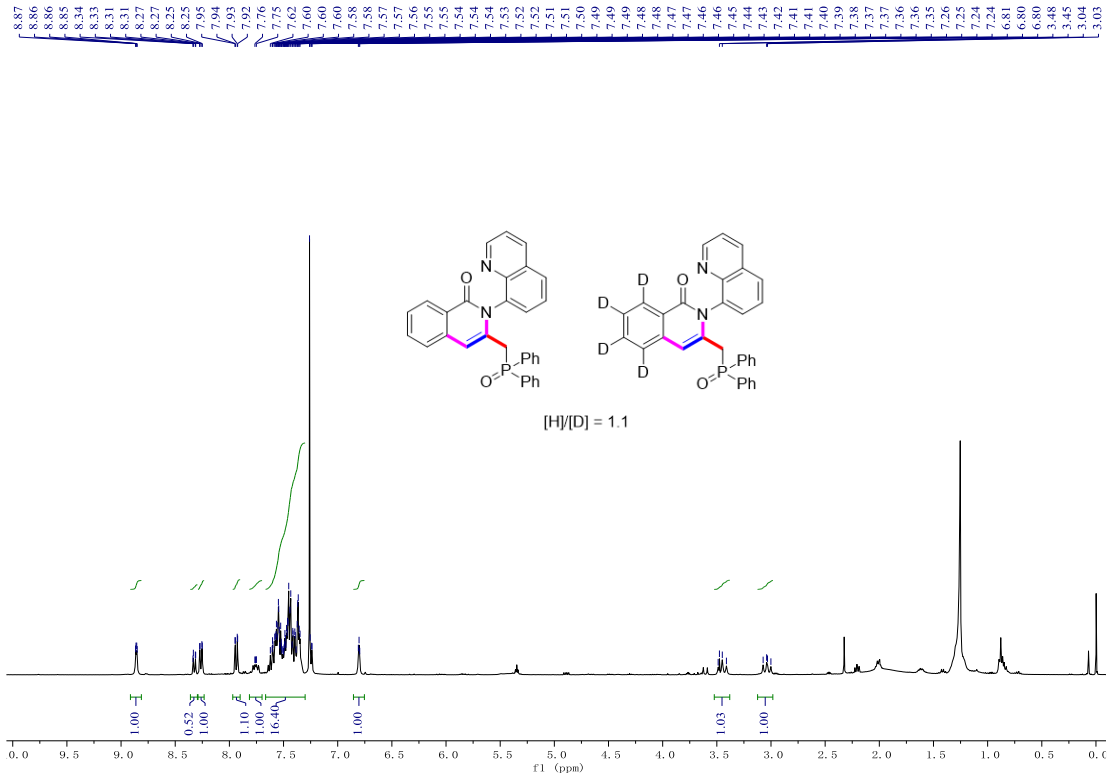

8.87  
8.86  
8.85

8.34  
8.31  
8.27  
8.25

7.95  
7.94  
7.92

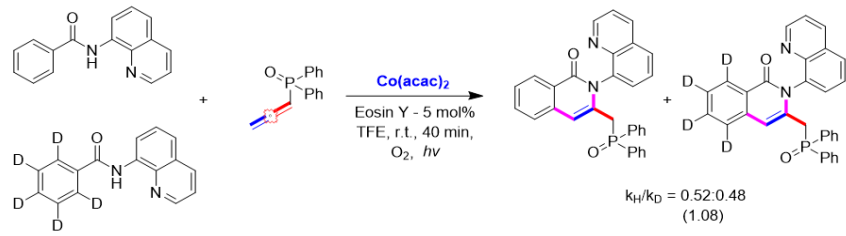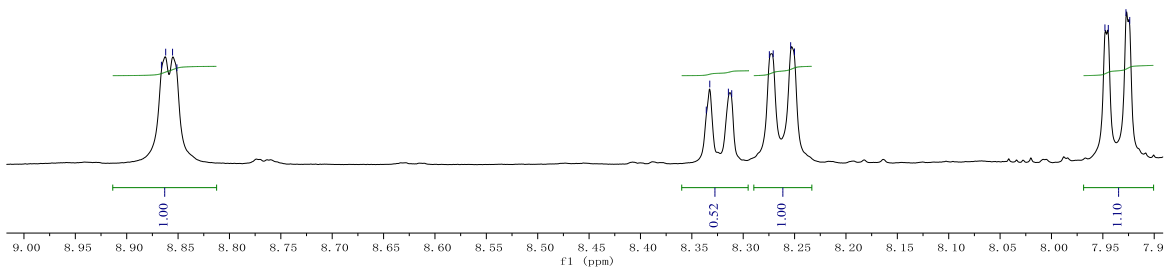

### 3-((Diphenylphosphoryl)methyl)-2-(quinolin-8-yl)isoquinolin-1(2H)-one-5,6,7,8-d<sub>4</sub>

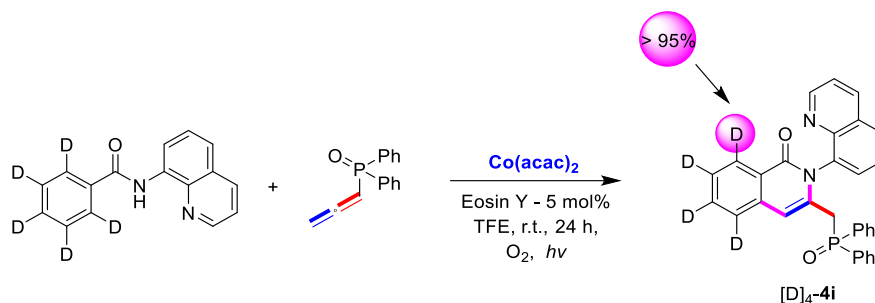

A sealed tube with a screw cap (PTFE) was charged with *N*-(quinoline-8-yl)benzamide-2,3-4,5,6-d<sub>5</sub> (25.4 mg, 0.1 mmol), KOTf (3.76 mg, 20 mol%, 0.02 mmol), Co(acac)<sub>2</sub> (5.14 mmol, 20 mmol%, 0.02 mmol), Eosin Y (3.45 mg, 5 mol%, 0.005 mmol), and diphenyl(propa-1,2-dien-1-yl)phosphine oxide (48.0 mg, 2.0 equiv., 0.2 mmol) in 1.5 mL 2,2,2-trifluoroethanol under oxygen atmosphere. Then, the resulted solution was placed in 15 W white LED at room temperature for 24 h, the reaction process was detected by thin-layer chromatography (TLC). Upon completion, the reaction mixture was evaporated under reduced pressure and passed through the column for purification. Dichloromethane and acetone mixture were used as an eluent. [D]<sub>4</sub>-**4i** is obtained as a yellow solid; 39.2 mg, 80% yield. <sup>1</sup>H-NMR (400 MHz, Chloroform-*d*) δ 8.85 (d, *J* = 4.0 Hz, 1H), 8.28 (d, *J* = 4.0 Hz, 1H), 7.94 (d, *J* = 8.0 Hz, 1H), 7.77 - 7.74 (m, 1H), 7.60 - 7.28 (m, 12H), 6.78 (d, *J* = 4.0 Hz, 1H), 3.46 (dd, *J* = 15.9, 8.0 Hz, 1H), 3.03 (dd, *J* = 16.0, 8.0 Hz, 1H). <sup>13</sup>C-NMR (100 MHz, Chloroform-*d*) δ 163.7, 151.6, 144.5, 136.9, 136.5, 135.7, 134.3, 134.2, 133.1, 132.5, 132.3, 132.2, 132.1, 131.74, 131.70, 131.5, 131.4, 131.0, 130.9, 130.7, 129.5, 129.3, 129.0, 128.9, 128.86, 128.78, 128.7, 126.6, 125.3, 122.0, 108.1, 35.3, 34.6. HRMS (ESI): calculated for C<sub>31</sub>H<sub>19</sub>D<sub>4</sub>N<sub>2</sub>O<sub>2</sub>P for [M+H]<sup>+</sup> 491.1825, found: 491.1824.

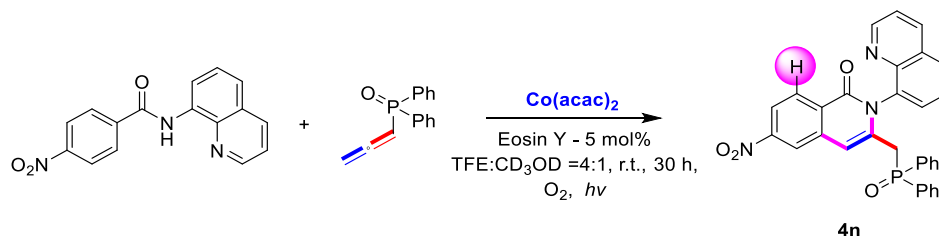

In an oven dried Schlenk tube charged with magnetic stirrer, 4-nitro-*N*-(quinolin-8-yl)benzamide (0.1 mmol, 1.0 equiv.), Co(acac)<sub>2</sub> (0.02 mmol, 20 mol%), potassium trifluoride mesylate (0.02 mmol, 20 mol%) and Eosin Y disodium salt (0.005 mmol, 5 mol%) were added. Freshly prepared allene was subsequently added to the reaction mixture followed by freshly distilled 2,2,2-trifluoroethanol (1.2 mL)

and methanol- $d_4$  (0.5 mL) as a mixture solvent. The Schlenk tube was evacuated and purged with oxygen. Then, the resulted solution was placed in 15 W white LED at room temperature for 30 h. After the reaction, the crude purified by flash chromatography (silica gel, petroleum ether/ ethyl acetate = 1:1 to 1:2), affording the desired product as a yellow solid (32.1 mg, 65% isolated yield).  **$^1\text{H-NMR}$  (400 MHz, Chloroform- $d$ )**  $\delta$  8.85 (d,  $J$  = 4.0 Hz, 1H), 8.45 (d,  $J$  = 4.0, 1H), 8.28-8.27 (m, 2H), 8.15 (dd,  $J$  = 8.0, 4.0 Hz, 1H), 7.98 (d,  $J$  = 4.0 Hz, 1H), 7.77-7.73 (m, 3H), 7.63 - 7.45 (m, 13H), 7.37-7.35 (m, 3H), 6.78 (d,  $J$  = 4.0 Hz, 1H), 3.45 (dd,  $J$  = 15.9, 8.0 Hz, 1H), 3.07 (dd,  $J$  = 16.0, 8.0 Hz, 1H).

#### Isolation of Co(III) intermediate:

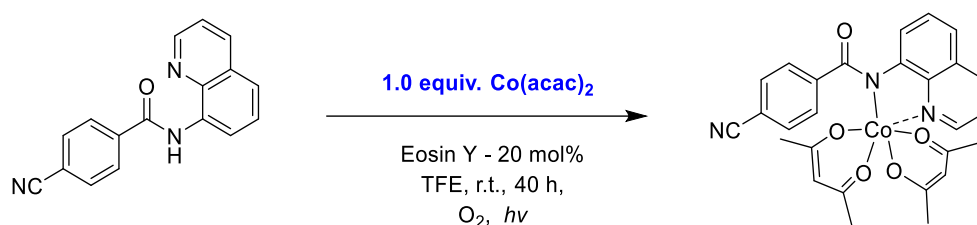

In an oven dried Schlenk tube charged with magnetic stirrer, 4-cyano-*N*-(quinolin-8-yl)benzamide (0.1 mmol, 1.0 equiv., 27.3 mg),  $\text{Co}(\text{acac})_2$  (0.1 mmol, 1.0 equiv., 51.4 mg), potassium trifluoride mesylate (0.02 mmol, 20 mol%, 3.76 mg) and Eosin Y disodium salt (0.02 mmol, 20 mol%) were added. Freshly prepared allene was subsequently added to the reaction mixture followed by freshly distilled 2,2,2-trifluoroethanol (1.5 mL) as a mixture solvent. The Schlenk tube was evacuated and purged with oxygen. Then, the resulted solution was placed in 15 W white LED at room temperature for 40 h. After the reaction, the crude purified by flash chromatography (silica gel, petroleum ether/ ethyl acetate = 1:1 to 1:2), affording the desired product as a green black solid (13.3 mg, 25% isolated yield).  **$^1\text{H-NMR}$  (400 MHz, Chloroform- $d$ )**  $\delta$  8.91 (d,  $J$  = 8.0 Hz, 1H), 8.45 (d,  $J$  = 8.0 Hz, 1H), 8.20 (dd,  $J$  = 8.0, 4.0 Hz, 1H), 7.86-7.84 (m, 2H), 7.59 - 7.51 (m, 4H), 7.38 (d,  $J$  = 8.0 Hz, 1H), 5.50 (s 1H), 5.25 (s, 1H), 2.14 (s, 3H), 2.03 (s, 3H), 1.80 (s, 3H), 1.45 (s, 3H);  **$^{13}\text{C NMR}$  (101 MHz, Chloroform- $d$ )**  $\delta$  189.9, 189.0, 188.9, 188.5, 151.7, 149.3, 147.9, 138.7, 131.0, 130.0, 130.0, 129.5, 123.5, 121.3, 118.3, 112.1, 98.1, 97.4, 29.9, 29.5, 26.7, 26.4, 26.0, 25.7. HRMS (ESI): calculated for  $\text{C}_{26}\text{H}_{25}\text{CoN}_3\text{O}_5$  for  $[\text{M}+\text{H}]^+$  530.1122, found: 530.1119.

## Experimental Section:

### Typical procedure for annulation of benzamides with allenes:

In an oven dried Schlenk tube charged with magnetic stirrer, benzamide (0.1 mmol, 1.0 equiv.),  $\text{Co}(\text{acac})_2$  (0.02 mmol, 20 mol%), potassium trifluoride mesylate (0.02 mmol, 20 mol%) and Eosin Y disodium salt (0.005 mmol, 5 mol%) were added. Freshly prepared allene was subsequently added to the reaction mixture followed by freshly distilled 2,2,2-trifluoroethanol (1.5 mL) as solvent. The Schlenk tube was evacuated and purged with oxygen. Then, the resulted solution was placed in 15 W white LED at room temperature for 24 h. The reaction process was detected by thin-layer chromatography (TLC). Upon completion, the reaction mixture was evaporated under reduced pressure and passed through the column for purification. Petroleum ether and ethyl acetate mixture was used as an eluent.

### Gram scale synthesis of dihydroisoquinolin-1(2H)-ones

#### 3-((diphenylphosphoryl)methyl)-2-(quinolin-8-yl)-8-(trifluoromethyl)isoquinolin-1(2H)-one (4m)

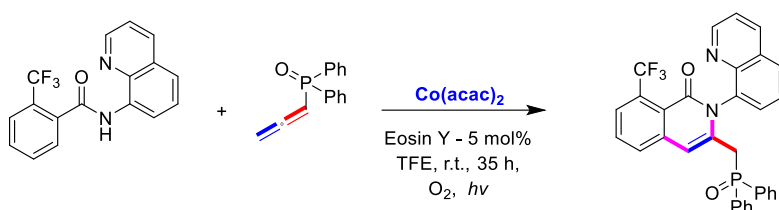

In an oven dried Schlenk tube charged with magnetic stirrer, *N*-(quinolin-8-yl)-2-(trifluoromethyl)benzamide (1.90 mmol, 1.0 equiv., 0.60 g),  $\text{Co}(\text{acac})_2$  (0.38 mmol, 20 mol%, 97.7 mg), potassium trifluoride mesylate (0.38 mmol, 20 mol%, 71.4 mg) and Eosin Y disodium salt (0.095 mmol, 5 mol%, 66.2 mg) were added. Freshly prepared diphenyl(propa-1,2-dien-1-yl)phosphine (2.85 mmol, 1.5 equiv., 684.0 mg) was subsequently added to the reaction mixture followed by freshly distilled 2,2,2-trifluoroethanol (12 mL) as solvent. The Schlenk tube was evacuated and purged with oxygen. Then, the resulted solution was placed in 15 W white LED at room temperature for 35 h. The reaction process was detected by thin-layer chromatography (TLC). After the reaction, the crude purified by flash chromatography (silica gel, petroleum ether/ ethyl acetate = 1:1 to 1:2), affording the desired product **4m** as a yellow solid (864.6 mg, 79% isolated yield).  $^1\text{H-NMR}$  (400 MHz,  $\text{Chloroform-d}$ )  $\delta$   $^1\text{H NMR}$  (400

MHz, CDCl<sub>3</sub>) δ 8.85 (d, *J* = 4.0 Hz, 1H), 8.25 (dd, *J* = 8.0, 4.0 Hz, 1H), 7.92 (d, *J* = 8.0 Hz, 1H), 7.85 (dd, *J* = 8.0, 4.0 Hz, 1H), 7.67-7.34 (m, 15H), 7.30 (d, *J* = 8.0 Hz, 1H), 6.85 (s, 1H), 3.37 (dd, *J* = 15.9, 8.0 Hz, 1H), 3.00 (dd, *J* = 16.0, 8.0 Hz, 1H). <sup>13</sup>C NMR (100 MHz, CDCl<sub>3</sub>) δ 160.7, 151.5, 144.4, 136.5, 136.3, 135.5, 132.9, 132.4, 131.9, 131.8, 131.5, 131.4, 131.3, 131.2, 130.99, 130.89, 130.8, 129.5, 129.5, 129.0, 128.9, 128.86, 128.8, 126.8, 126.4, 122.5, 122.1, 107.4, 107.38, 35.18, 34.52. HRMS (ESI): calculated for C<sub>32</sub>H<sub>23</sub>F<sub>3</sub>N<sub>2</sub>O<sub>2</sub>P for [M+H]<sup>+</sup> 555.1451, found: 555.1450.

### 3-((diphenylphosphoryl)methyl)-6-nitro-2-(quinolin-8-yl)isoquinolin-1(2H)-one (4n)

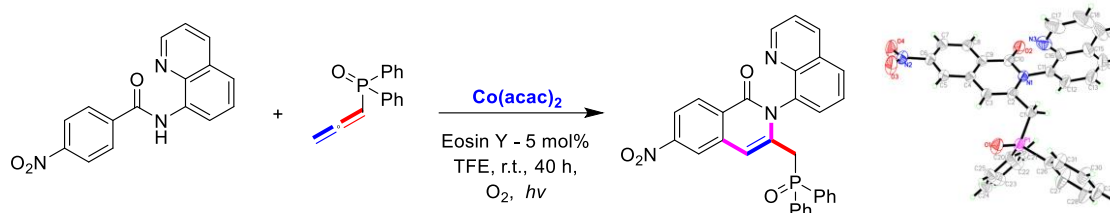

In an oven dried Schlenk tube charged with magnetic stirrer, 4-nitro-*N*-(quinolin-8-yl)benzamide (4 mmol, 1.0 equiv., 1.17 g), Co(acac)<sub>2</sub> (0.8 mmol, 20 mol%, 205.6 mg), potassium trifluoride mesylate (0.8 mmol, 20 mol%, 150 mg) and Eosin Y disodium salt (0.2 mmol, 5 mol%, 139.4 mg) were added. Freshly prepared diphenyl(propa-1,2-dien-1-yl)phosphine (6 mmol, 1.5 equiv., 1.44 g) was subsequently added to the reaction mixture followed by freshly distilled 2,2,2-trifluoroethanol (20 mL) as solvent. The Schlenk tube was evacuated and purged with oxygen. Then, the resulted solution was placed in 15 W white LED at room temperature for 40 h. The reaction process was detected by thin-layer chromatography (TLC). After the reaction, the crude purified by flash chromatography (silica gel, dichloromethane / acetone = 90:10 to 70:30), affording the desired product **4n** as a yellow solid (1.91 g, 87% isolated yield). The corresponding crystal was obtained in ether : methanol (50:50). <sup>1</sup>H-NMR (400 MHz, Chloroform-*d*) δ 8.85 (d, *J* = 4.0 Hz, 1H), 8.45 (*J* = 4.0, 1H), 8.28-8.27 (m, 2H), 8.15 (dd, *J* = 8.0, 4.0 Hz, 1H), 7.98 (d, *J* = 4.0 Hz, 1H), 7.77-7.73 (m, 3H), 7.63 - 7.45 (m, 13H), 7.37-7.35 (m, 3H), 6.78 (d, *J* = 4.0 Hz, 1H), 3.45 (dd, *J* = 15.9, 8.0 Hz, 1H), 3.07 (dd, *J* = 16.0, 8.0 Hz, 1H). <sup>13</sup>C NMR (100 MHz, CDCl<sub>3</sub>) δ 169.4, 151.6, 144.6, 143.3, 137.3, 136.5, 136.5, 135.8, 135.3, 131.5, 129.6, 129.4, 128.68, 128.65, 128.6, 128.5, 128.4, 126.4, 125.8, 123.5, 122.0, 108.0, 67.0, 40.2, 22.0. HRMS (ESI): calculated for C<sub>31</sub>H<sub>22</sub>N<sub>3</sub>O<sub>4</sub>P for [M+H]<sup>+</sup> 532.1431, found: 532.1429.

## Cyclic Voltammetry

The cyclic voltammetry was carried out with an Advances Measurement Technology Inc, 12608W and the analysis was performed with the Nova 2.0 software. A glassy-carbon electrode (3 mm-diameter, disc-electrode) was used as the working electrode, 2DPBTA+PDA on Au electrode in 0.1M tetrabutylammonium hexafluorophosphate (TBAP)/CH<sub>3</sub>CN solution with Ag/AgCl as the reference electrode.

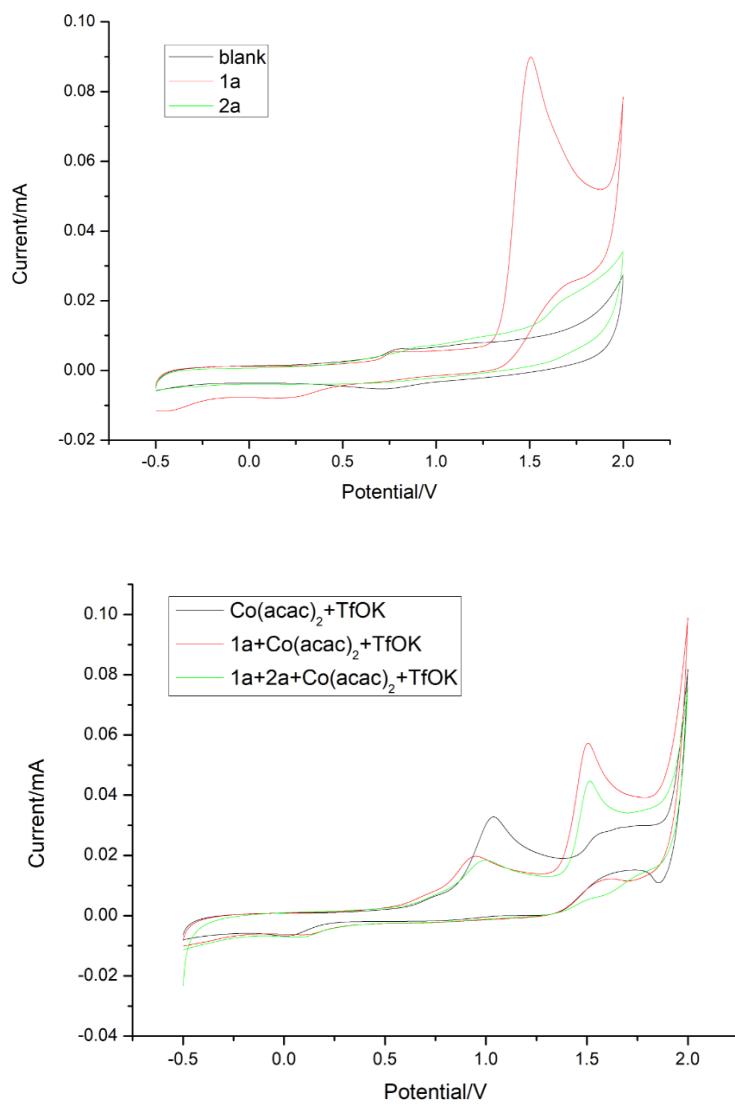

**Figure S1** Cyclic voltammograms at 100 mVs<sup>-1</sup>. General conditions: acetonitrile, 0.1 M n-Bu<sub>4</sub>NPF<sub>6</sub>, 5 mM TfOK, 5 mM Co(acac)<sub>2</sub>, 5 mM substrates 1a and 2a, and 100 mV/s.



## Crystal Data and Experimental

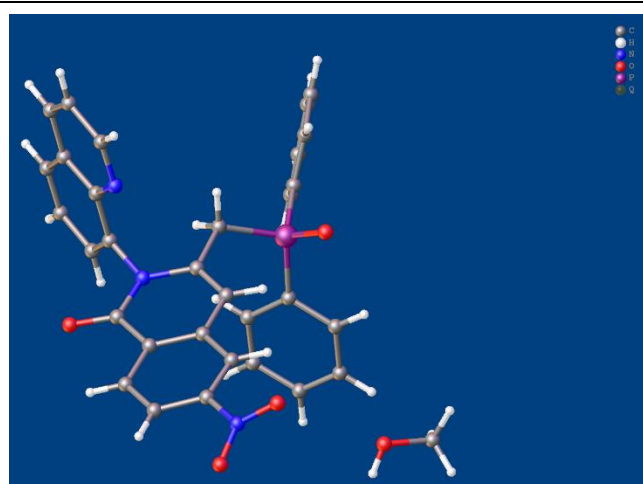

**Experimental.** Single slight yellow bulk crystals of **B-2-41 (4n)** were used as supplied. A suitable crystal with dimensions  $0.31 \times 0.26 \times 0.21 \text{ mm}^3$  was selected and mounted on a Xcalibur, Atlas, Gemini ultra diffractometer. The crystal was kept at a steady  $T = 293(2) \text{ K}$  during data collection. The structure was solved with the **Superflip** (Palatinus & Chapuis, 2007; Palatinus & van der Lee, 2008; Palatinus et al., 2012) solution program using iterative methods and by using **Olex2** (Dolomanov et al., 2009) as the graphical interface. The model was refined with **ShelXL** 2018/3 (Sheldrick, 2015) using full matrix least squares minimisation on  $F^2$ .

**Crystal Data.**  $\text{C}_{32}\text{H}_{26}\text{N}_3\text{O}_5\text{P}$ ,  $M_r = 563.53$ , monoclinic,  $P2_1/c$  (No. 14),  $a = 10.3471(8) \text{ \AA}$ ,  $b = 19.4565(10) \text{ \AA}$ ,  $c = 14.7658(9) \text{ \AA}$ ,  $\beta = 107.958(7)^\circ$ ,  $\alpha = \gamma = 90^\circ$ ,  $V = 2827.8(3) \text{ \AA}^3$ ,  $T = 293(2) \text{ K}$ ,  $Z = 4$ ,  $Z' = 1$ ,  $\mu(\text{Cu K}\alpha) = 1.247$ , 19240 reflections measured, 5006 unique ( $R_{int} = 0.0484$ ) which were used in all calculations. The final  $wR_2$  was 0.2427 (all data) and  $R_1$  was 0.0722 ( $I > 2(I)$ ).

| Compound                      | <b>B-2-41 (4n)</b>                                       |
|-------------------------------|----------------------------------------------------------|
| Formula                       | $\text{C}_{32}\text{H}_{26}\text{N}_3\text{O}_5\text{P}$ |
| $D_{calc.}/ \text{g cm}^{-3}$ | 1.324                                                    |
| $\mu/\text{mm}^{-1}$          | 1.247                                                    |
| Formula Weight                | 563.53                                                   |
| Colour                        | Slight yellow                                            |
| Shape                         | Bulk crystals                                            |
| Size/ $\text{mm}^3$           | $0.31 \times 0.26 \times 0.21$                           |
| $T/\text{K}$                  | 293(2)                                                   |
| Crystal System                | monoclinic                                               |
| Space Group                   | $P2_1/c$                                                 |
| $a/\text{\AA}$                | 10.3471(8)                                               |
| $b/\text{\AA}$                | 19.4565(10)                                              |
| $c/\text{\AA}$                | 14.7658(9)                                               |
| $\alpha^\circ$                | 90                                                       |
| $\beta^\circ$                 | 107.958(7)                                               |
| $\gamma^\circ$                | 90                                                       |
| $V/\text{\AA}^3$              | 2827.8(3)                                                |
| $Z$                           | 4                                                        |
| $Z'$                          | 1                                                        |
| Wavelength/ $\text{\AA}$      | 1.54184                                                  |
| Radiation type                | Cu $K\alpha$                                             |
| $\theta_{min}/^\circ$         | 3.881                                                    |
| $\theta_{max}/^\circ$         | 67.938                                                   |
| Measured Refl's.              | 19240                                                    |
| Ind't Refl's                  | 5006                                                     |
| Refl's with $I > 2(I)$        | 3517                                                     |
| $R_{int}$                     | 0.0484                                                   |
| Parameters                    | 372                                                      |
| Restraints                    | 6                                                        |
| Largest Peak                  | 0.810                                                    |
| Deepest Hole                  | -0.441                                                   |
| GooF                          | 1.039                                                    |
| $wR_2$ (all data)             | 0.2427                                                   |
| $wR_2$                        | 0.2135                                                   |
| $R_1$ (all data)              | 0.0968                                                   |
| $R_1$                         | 0.0722                                                   |

**Table 1 Crystal data and structure refinement for B-2-41 (4n).**

|                                             |                                                                 |
|---------------------------------------------|-----------------------------------------------------------------|
| Identification code                         | B-2-41                                                          |
| Empirical formula                           | C <sub>32</sub> H <sub>26</sub> N <sub>3</sub> O <sub>5</sub> P |
| Formula weight                              | 563.53                                                          |
| Temperature/K                               | 293(2)                                                          |
| Crystal system                              | monoclinic                                                      |
| Space group                                 | P2 <sub>1</sub> /c                                              |
| a/Å                                         | 10.3471(8)                                                      |
| b/Å                                         | 19.4565(10)                                                     |
| c/Å                                         | 14.7658(9)                                                      |
| α/°                                         | 90                                                              |
| β/°                                         | 107.958(7)                                                      |
| γ/°                                         | 90                                                              |
| Volume/Å <sup>3</sup>                       | 2827.8(3)                                                       |
| Z                                           | 4                                                               |
| ρ <sub>calc</sub> /cm <sup>3</sup>          | 1.324                                                           |
| μ/mm <sup>-1</sup>                          | 1.247                                                           |
| F(000)                                      | 1176.0                                                          |
| Crystal size/mm <sup>3</sup>                | 0.31 × 0.26 × 0.21                                              |
| Radiation                                   | Cu Kα (λ = 1.54184)                                             |
| 2θ range for data collection/°              | 7.762 to 135.876                                                |
| Index ranges                                | -11 ≤ h ≤ 12, -23 ≤ k ≤ 20, -17 ≤ l ≤ 17                        |
| Reflections collected                       | 19240                                                           |
| Independent reflections                     | 5006 [R <sub>int</sub> = 0.0484, R <sub>sigma</sub> = 0.0316]   |
| Data/restraints/parameters                  | 5006/6/372                                                      |
| Goodness-of-fit on F <sup>2</sup>           | 1.039                                                           |
| Final R indexes [I >= 2σ (I)]               | R <sub>1</sub> = 0.0722, wR <sub>2</sub> = 0.2135               |
| Final R indexes [all data]                  | R <sub>1</sub> = 0.0968, wR <sub>2</sub> = 0.2427               |
| Largest diff. peak/hole / e Å <sup>-3</sup> | 0.81/-0.44                                                      |

**Table 2 Fractional Atomic Coordinates (×10<sup>4</sup>) and Equivalent Isotropic Displacement Parameters (Å<sup>2</sup>×10<sup>3</sup>) for B-2-41 (4n). U<sub>eq</sub> is defined as 1/3 of the trace of the orthogonalised U<sub>ij</sub> tensor.**

| Atom | x          | y         | z         | U(eq)     |
|------|------------|-----------|-----------|-----------|
| P12  | 6959.6(2)  | 2485.8(2) | 2826.3(2) | 63.23(5)  |
| O13  | 6654.0(6)  | 2237.5(3) | 3685.9(3) | 84.38(18) |
| O27  | 12335.0(5) | 4176.6(3) | 3778.0(4) | 82.64(18) |

|     |             |            |            |           |
|-----|-------------|------------|------------|-----------|
| O26 | 10768.2(8)  | 5137.3(4)  | 7823.2(4)  | 115.8(2)  |
| N10 | 10637.6(5)  | 3389.6(3)  | 3469.6(4)  | 58.70(17) |
| C28 | 6202.0(7)   | 3307.5(4)  | 2424.4(5)  | 66.6(2)   |
| N24 | 10326.4(7)  | 4599.8(3)  | 7432.3(4)  | 78.7(2)   |
| C8  | 11066.6(7)  | 4105.9(3)  | 4866.9(4)  | 56.4(2)   |
| C19 | 13360.7(10) | 1593.3(6)  | 2679.4(10) | 158.0(4)  |
| O25 | 9727.4(8)   | 4185.3(4)  | 7771.4(4)  | 117.8(3)  |
| C3  | 10012.7(6)  | 3774.0(3)  | 5096.8(4)  | 54.13(19) |
| C34 | 6362.8(7)   | 1906.4(3)  | 1830.9(5)  | 60.7(2)   |
| C5  | 10566.8(7)  | 4437.3(4)  | 6528.8(5)  | 61.5(2)   |
| C1  | 9538.8(7)   | 3082.1(3)  | 3678.5(5)  | 58.6(2)   |
| C4  | 9778.1(7)   | 3941.5(4)  | 5956.0(5)  | 60.6(2)   |
| C9  | 11409.0(7)  | 3913.0(4)  | 4012.0(5)  | 60.8(2)   |
| C7  | 11840.1(7)  | 4614.4(4)  | 5466.7(5)  | 64.1(2)   |
| C11 | 8746.6(7)   | 2551.7(4)  | 2968.7(5)  | 66.2(2)   |
| C2  | 9223.2(7)   | 3269.4(4)  | 4457.8(4)  | 60.2(2)   |
| C14 | 11162.4(7)  | 3074.8(4)  | 2767.3(5)  | 71.5(2)   |
| N16 | 12263.7(7)  | 2247.7(4)  | 3962.9(6)  | 93.5(3)   |
| C15 | 12000.5(7)  | 2485.4(4)  | 3052.8(6)  | 79.9(3)   |
| C6  | 11588.4(8)  | 4783.1(4)  | 6297.4(5)  | 67.7(2)   |
| C20 | 12511.6(8)  | 2178.3(5)  | 2370.3(7)  | 106.4(3)  |
| C33 | 6633.5(8)   | 3733.3(4)  | 1821.3(6)  | 78.1(3)   |
| C17 | 13047.4(10) | 1705.0(5)  | 4205.8(11) | 124.9(5)  |
| C41 | 7065.1(14)  | 4024.4(7)  | 9591.8(9)  | 171.6(5)  |
| C18 | 13616.5(11) | 1366.7(6)  | 3572.7(13) | 165.0(7)  |
| C39 | 6529.3(9)   | 1212.3(4)  | 1986.3(6)  | 79.9(3)   |
| C38 | 6100.7(10)  | 748.4(4)   | 1253.9(6)  | 87.0(3)   |
| C23 | 10871.5(9)  | 3339.8(6)  | 1876.5(5)  | 93.9(3)   |
| C37 | 5459.7(10)  | 971.7(4)   | 355.3(6)   | 90.2(3)   |
| C29 | 5061.0(8)   | 3509.5(5)  | 2661.7(6)  | 87.4(3)   |
| C32 | 5965.0(10)  | 4329.5(4)  | 1486.0(8)  | 94.4(3)   |
| C21 | 12175.4(9)  | 2460.8(6)  | 1447.6(7)  | 134.4(3)  |
| C30 | 4399.1(9)   | 4122.7(5)  | 2308.3(8)  | 105.6(3)  |
| C31 | 4842.7(10)  | 4523.7(5)  | 1729.6(8)  | 105.1(4)  |
| C36 | 5254.0(16)  | 1651.9(5)  | 195.8(7)   | 139.9(6)  |
| C22 | 11380.0(10) | 3014.1(7)  | 1201.5(7)  | 127.0(4)  |
| C35 | 5715.4(14)  | 2122.0(5)  | 926.9(6)   | 117.3(5)  |
| O40 | 8334.4(19)  | 4203.7(10) | 9757.9(13) | 273.3(3)  |

---

**Table 3 Anisotropic Displacement Parameters ( $\text{\AA}^2 \times 10^3$ ) for B-2-41 (4n). The Anisotropic displacement factor exponent takes the form:  $-2\pi^2[h^2a^*U_{11}+2hka^*b^*U_{12}+\dots]$ .**

| Atom | U <sub>11</sub> | U <sub>22</sub> | U <sub>33</sub> | U <sub>23</sub> | U <sub>13</sub> | U <sub>12</sub> |
|------|-----------------|-----------------|-----------------|-----------------|-----------------|-----------------|
| P12  | 73.95(9)        | 64.28(9)        | 56.54(8)        | -15.58(7)       | 27.55(6)        | -19.19(7)       |
| O13  | 107.3(3)        | 91.8(3)         | 61.8(2)         | -14.6(2)        | 37.5(2)         | -31.7(3)        |
| O27  | 90.4(3)         | 92.2(3)         | 72.4(3)         | -15.8(3)        | 35.4(2)         | -32.9(3)        |
| O26  | 144.4(5)        | 116.2(4)        | 98.5(3)         | -57.1(3)        | 54.8(3)         | -33.2(4)        |
| N10  | 59.9(3)         | 63.1(3)         | 53.6(2)         | -8.7(2)         | 18.4(2)         | -6.3(2)         |
| C28  | 72.0(3)         | 63.5(4)         | 73.0(3)         | -25.5(3)        | 35.3(2)         | -19.6(3)        |
| N24  | 87.4(4)         | 86.9(4)         | 61.4(3)         | -20.1(3)        | 22.5(3)         | -5.6(3)         |
| C8   | 61.7(3)         | 51.5(3)         | 51.2(3)         | 1.2(3)          | 10.3(2)         | 1.2(3)          |
| C19  | 83.9(4)         | 122.6(6)        | 292.6(10)       | -118.4(6)       | 94.8(5)         | -42.4(4)        |
| O25  | 163.0(5)        | 125.3(5)        | 83.6(3)         | -27.0(3)        | 65.2(3)         | -42.3(4)        |
| C3   | 57.4(3)         | 50.3(3)         | 51.4(3)         | -0.2(3)         | 12.0(2)         | 0.7(3)          |
| C34  | 70.7(3)         | 58.7(3)         | 55.2(3)         | -9.9(3)         | 23.3(2)         | -13.8(3)        |
| C5   | 74.9(4)         | 57.8(3)         | 49.9(3)         | -6.1(3)         | 16.4(3)         | 2.7(3)          |
| C1   | 59.9(3)         | 55.6(3)         | 58.6(3)         | -7.5(3)         | 15.7(3)         | -4.5(3)         |
| C4   | 65.0(3)         | 60.9(4)         | 55.7(3)         | -2.8(3)         | 18.2(2)         | -0.2(3)         |
| C9   | 65.3(3)         | 59.0(4)         | 57.3(3)         | -2.2(3)         | 17.5(3)         | -7.4(3)         |
| C7   | 70.8(4)         | 57.8(4)         | 61.8(3)         | -5.0(3)         | 17.6(3)         | -7.8(3)         |
| C11  | 68.8(4)         | 66.4(4)         | 63.7(3)         | -17.4(3)        | 21.1(3)         | -8.4(3)         |
| C2   | 62.8(3)         | 63.0(4)         | 56.0(3)         | -6.4(3)         | 19.9(2)         | -8.0(3)         |
| C14  | 67.7(4)         | 83.0(4)         | 67.2(3)         | -26.8(3)        | 26.0(3)         | -15.6(3)        |
| N16  | 78.7(4)         | 73.8(4)         | 125.0(5)        | -16.2(4)        | 26.9(4)         | 3.0(3)          |
| C15  | 62.4(3)         | 79.3(4)         | 106.3(4)        | -41.8(3)        | 38.3(3)         | -22.7(3)        |
| C6   | 78.9(4)         | 54.9(3)         | 63.0(4)         | -11.8(3)        | 12.8(3)         | -3.6(3)         |
| C20  | 72.5(4)         | 110.2(5)        | 154.4(5)        | -77.8(4)        | 61.2(3)         | -38.8(4)        |
| C33  | 84.6(4)         | 62.3(4)         | 100.0(4)        | -8.9(4)         | 46.8(3)         | -9.7(3)         |
| C17  | 85.5(6)         | 74.5(5)         | 206.0(11)       | -15.3(7)        | 32.1(6)         | 8.1(5)          |
| C41  | 235.0(9)        | 150.3(10)       | 187.0(7)        | -70.7(7)        | 149.5(5)        | -48.5(8)        |
| C18  | 81.2(6)         | 96.3(7)         | 316.2(16)       | -62.6(8)        | 59.2(7)         | 0.4(5)          |
| C39  | 109.7(6)        | 60.8(4)         | 61.5(4)         | -2.3(3)         | 14.9(4)         | -1.0(4)         |
| C38  | 115.4(6)        | 54.2(4)         | 82.1(5)         | -13.2(4)        | 16.6(4)         | -7.1(4)         |
| C23  | 93.2(5)         | 134.7(7)        | 60.0(4)         | -21.8(4)        | 32.6(3)         | -31.4(5)        |
| C37  | 117.7(6)        | 70.2(4)         | 71.0(4)         | -25.7(3)        | 11.6(4)         | -5.6(5)         |
| C29  | 82.2(4)         | 89.1(5)         | 105.7(4)        | -33.3(4)        | 50.6(3)         | -23.9(4)        |
| C32  | 101.8(5)        | 64.4(4)         | 125.5(6)        | -0.1(5)         | 47.6(4)         | -6.0(4)         |
| C21  | 107.0(4)        | 178.6(7)        | 148.4(5)        | -111.1(4)       | 84.7(3)         | -73.5(5)        |

|     |           |           |          |          |          |          |
|-----|-----------|-----------|----------|----------|----------|----------|
| C30 | 85.1(4)   | 94.2(6)   | 149.2(6) | -42.9(5) | 53.3(4)  | -2.0(4)  |
| C31 | 97.4(6)   | 69.0(5)   | 149.7(8) | -21.9(5) | 39.3(5)  | -5.5(4)  |
| C36 | 240.1(14) | 81.0(6)   | 58.0(5)  | -12.1(4) | -13.5(7) | 21.1(8)  |
| C22 | 113.2(5)  | 194.3(10) | 89.4(4)  | -62.7(5) | 54.8(4)  | -59.9(6) |
| C35 | 206.2(11) | 59.3(5)   | 63.8(5)  | -7.3(4)  | 8.4(6)   | 4.8(6)   |
| O40 | 272.8(5)  | 279.0(5)  | 268.5(5) | -5.6(4)  | 84.2(4)  | 1.4(4)   |

**Table 4 Bond Lengths for B-2-41 (4n).**

| Atom | Atom | Length/Å   | Atom | Atom | Length/Å   |
|------|------|------------|------|------|------------|
| P12  | O13  | 1.4805(6)  | C5   | C6   | 1.3818(12) |
| P12  | C28  | 1.7988(7)  | C1   | C11  | 1.5185(9)  |
| P12  | C34  | 1.8036(7)  | C1   | C2   | 1.3399(11) |
| P12  | C11  | 1.7999(8)  | C7   | C6   | 1.3701(11) |
| O27  | C9   | 1.2266(10) | C14  | C15  | 1.4210(11) |
| O26  | N24  | 1.2138(9)  | C14  | C23  | 1.3574(11) |
| N10  | C1   | 1.4007(10) | N16  | C15  | 1.3668(12) |
| N10  | C9   | 1.3861(8)  | N16  | C17  | 1.3122(12) |
| N10  | C14  | 1.4466(10) | C15  | C20  | 1.4075(14) |
| C28  | C33  | 1.3870(12) | C20  | C21  | 1.4097(14) |
| C28  | C29  | 1.3880(12) | C33  | C32  | 1.3630(11) |
| N24  | O25  | 1.2151(11) | C17  | C18  | 1.412(2)   |
| N24  | C5   | 1.4650(10) | C41  | O40  | 1.307(2)   |
| C8   | C3   | 1.3963(10) | C39  | C38  | 1.3730(11) |
| C8   | C9   | 1.4614(11) | C38  | C37  | 1.3589(12) |
| C8   | C7   | 1.4025(9)  | C23  | C22  | 1.4124(15) |
| C19  | C20  | 1.4242(13) | C37  | C36  | 1.3496(13) |
| C19  | C18  | 1.338(2)   | C29  | C30  | 1.3944(13) |
| C3   | C4   | 1.4016(10) | C32  | C31  | 1.3705(16) |
| C3   | C2   | 1.4304(9)  | C21  | C22  | 1.3356(16) |
| C34  | C39  | 1.3717(10) | C30  | C31  | 1.3384(17) |
| C34  | C35  | 1.3621(11) | C36  | C35  | 1.3828(13) |
| C5   | C4   | 1.3734(9)  |      |      |            |

**Table 5 Bond Angles for B-2-41 (4n).**

| Atom | Atom | Atom | Angle/°    | Atom | Atom | Atom | Angle/°    |
|------|------|------|------------|------|------|------|------------|
| O13  | P12  | C28  | 112.73(4)  | O27  | C9   | N10  | 120.34(7)  |
| O13  | P12  | C34  | 112.62(3)  | O27  | C9   | C8   | 123.67(6)  |
| O13  | P12  | C11  | 113.98(3)  | N10  | C9   | C8   | 115.97(6)  |
| C28  | P12  | C34  | 106.37(3)  | C6   | C7   | C8   | 120.36(7)  |
| C28  | P12  | C11  | 107.62(3)  | C1   | C11  | P12  | 116.46(6)  |
| C11  | P12  | C34  | 102.77(4)  | C1   | C2   | C3   | 120.82(7)  |
| C1   | N10  | C14  | 119.11(6)  | C15  | C14  | N10  | 117.30(7)  |
| C9   | N10  | C1   | 123.26(6)  | C23  | C14  | N10  | 120.91(7)  |
| C9   | N10  | C14  | 116.66(6)  | C23  | C14  | C15  | 121.78(8)  |
| C33  | C28  | P12  | 123.29(6)  | C17  | N16  | C15  | 117.39(10) |
| C33  | C28  | C29  | 117.40(7)  | N16  | C15  | C14  | 118.89(8)  |
| C29  | C28  | P12  | 119.11(6)  | N16  | C15  | C20  | 123.73(7)  |
| O26  | N24  | O25  | 122.76(8)  | C20  | C15  | C14  | 117.38(8)  |
| O26  | N24  | C5   | 118.31(7)  | C7   | C6   | C5   | 118.41(6)  |
| O25  | N24  | C5   | 118.90(6)  | C15  | C20  | C19  | 116.14(10) |
| C3   | C8   | C9   | 120.45(6)  | C15  | C20  | C21  | 119.42(8)  |
| C3   | C8   | C7   | 120.61(7)  | C21  | C20  | C19  | 124.44(10) |
| C7   | C8   | C9   | 118.92(7)  | C32  | C33  | C28  | 120.92(9)  |
| C18  | C19  | C20  | 119.64(12) | N16  | C17  | C18  | 122.89(13) |
| C8   | C3   | C4   | 118.60(6)  | C19  | C18  | C17  | 120.21(11) |
| C8   | C3   | C2   | 119.14(6)  | C34  | C39  | C38  | 121.47(7)  |
| C4   | C3   | C2   | 122.25(7)  | C37  | C38  | C39  | 120.05(8)  |
| C39  | C34  | P12  | 119.03(5)  | C14  | C23  | C22  | 119.59(9)  |
| C35  | C34  | P12  | 123.19(6)  | C36  | C37  | C38  | 119.16(8)  |
| C35  | C34  | C39  | 117.75(7)  | C28  | C29  | C30  | 120.37(9)  |
| C4   | C5   | N24  | 118.48(7)  | C33  | C32  | C31  | 121.03(10) |
| C4   | C5   | C6   | 122.98(7)  | C22  | C21  | C20  | 121.67(10) |
| C6   | C5   | N24  | 118.54(6)  | C31  | C30  | C29  | 120.81(10) |
| N10  | C1   | C11  | 116.13(6)  | C30  | C31  | C32  | 119.46(9)  |
| C2   | C1   | N10  | 120.15(6)  | C37  | C36  | C35  | 120.96(9)  |
| C2   | C1   | C11  | 123.71(7)  | C21  | C22  | C23  | 120.14(9)  |
| C5   | C4   | C3   | 119.01(7)  | C34  | C35  | C36  | 120.56(8)  |

**Table 6 Torsion Angles for B-2-41 (4n).**

| A   | B   | C   | D   | Angle/°     | A   | B   | C   | D   | Angle/°     |
|-----|-----|-----|-----|-------------|-----|-----|-----|-----|-------------|
| P12 | C28 | C33 | C32 | 175.47(6)   | C9  | C8  | C3  | C4  | 175.69(6)   |
| P12 | C28 | C29 | C30 | -175.75(6)  | C9  | C8  | C3  | C2  | -3.44(9)    |
| P12 | C34 | C39 | C38 | -179.65(8)  | C9  | C8  | C7  | C6  | -176.79(6)  |
| P12 | C34 | C35 | C36 | -178.56(11) | C7  | C8  | C3  | C4  | -2.35(9)    |
| O13 | P12 | C28 | C33 | 161.09(6)   | C7  | C8  | C3  | C2  | 178.52(6)   |
| O13 | P12 | C28 | C29 | -24.18(7)   | C7  | C8  | C9  | O27 | -0.77(10)   |
| O13 | P12 | C34 | C39 | -41.73(8)   | C7  | C8  | C9  | N10 | 177.68(6)   |
| O13 | P12 | C34 | C35 | 136.43(9)   | C11 | P12 | C28 | C33 | 34.55(7)    |
| O13 | P12 | C11 | C1  | -65.56(6)   | C11 | P12 | C28 | C29 | -150.71(6)  |
| O26 | N24 | C5  | C4  | -162.27(7)  | C11 | P12 | C34 | C39 | 81.35(8)    |
| O26 | N24 | C5  | C6  | 18.58(10)   | C11 | P12 | C34 | C35 | -100.49(10) |
| N10 | C1  | C11 | P12 | -148.16(5)  | C11 | C1  | C2  | C3  | -179.90(6)  |
| N10 | C1  | C2  | C3  | -1.21(10)   | C2  | C3  | C4  | C5  | -179.23(6)  |
| N10 | C14 | C15 | N16 | 0.11(10)    | C2  | C1  | C11 | P12 | 30.57(9)    |
| N10 | C14 | C15 | C20 | 179.98(6)   | C14 | N10 | C1  | C11 | -15.79(8)   |
| N10 | C14 | C23 | C22 | -178.93(8)  | C14 | N10 | C1  | C2  | 165.43(6)   |
| C28 | P12 | C34 | C39 | -165.69(7)  | C14 | N10 | C9  | O27 | 13.51(9)    |
| C28 | P12 | C34 | C35 | 12.46(10)   | C14 | N10 | C9  | C8  | -164.99(6)  |
| C28 | P12 | C11 | C1  | 60.24(6)    | C14 | C15 | C20 | C19 | 179.32(7)   |
| C28 | C33 | C32 | C31 | -0.41(13)   | C14 | C15 | C20 | C21 | -0.18(11)   |
| C28 | C29 | C30 | C31 | 0.55(13)    | C14 | C23 | C22 | C21 | -1.99(15)   |
| N24 | C5  | C4  | C3  | -179.01(6)  | N16 | C15 | C20 | C19 | -0.82(12)   |
| N24 | C5  | C6  | C7  | 177.92(6)   | N16 | C15 | C20 | C21 | 179.68(8)   |
| C8  | C3  | C4  | C5  | 1.66(9)     | N16 | C17 | C18 | C19 | -0.39(16)   |
| C8  | C3  | C2  | C1  | 4.33(9)     | C15 | C14 | C23 | C22 | 1.75(13)    |
| C8  | C7  | C6  | C5  | 0.49(10)    | C15 | N16 | C17 | C18 | 0.10(14)    |
| C19 | C20 | C21 | C22 | -179.53(10) | C15 | C20 | C21 | C22 | -0.08(14)   |
| O25 | N24 | C5  | C4  | 19.66(10)   | C6  | C5  | C4  | C3  | 0.10(10)    |
| O25 | N24 | C5  | C6  | -159.50(7)  | C20 | C19 | C18 | C17 | 0.06(16)    |
| C3  | C8  | C9  | O27 | -178.84(6)  | C20 | C21 | C22 | C23 | 1.16(16)    |
| C3  | C8  | C9  | N10 | -0.39(9)    | C33 | C28 | C29 | C30 | -0.71(11)   |
| C3  | C8  | C7  | C6  | 1.28(10)    | C33 | C32 | C31 | C30 | 0.22(15)    |
| C34 | P12 | C28 | C33 | -75.02(6)   | C17 | N16 | C15 | C14 | -179.61(8)  |
| C34 | P12 | C28 | C29 | 99.72(6)    | C17 | N16 | C15 | C20 | 0.53(12)    |
| C34 | P12 | C11 | C1  | 172.27(5)   | C18 | C19 | C20 | C15 | 0.50(13)    |
| C34 | C39 | C38 | C37 | -1.97(16)   | C18 | C19 | C20 | C21 | 179.97(10)  |
| C1  | N10 | C9  | O27 | -177.84(6)  | C39 | C34 | C35 | C36 | -0.39(19)   |

|    |     |     |     |            |     |     |     |     |           |
|----|-----|-----|-----|------------|-----|-----|-----|-----|-----------|
| C1 | N10 | C9  | C8  | 3.67(9)    | C39 | C38 | C37 | C36 | 0.06(18)  |
| C1 | N10 | C14 | C15 | -77.29(8)  | C38 | C37 | C36 | C35 | 1.6(2)    |
| C1 | N10 | C14 | C23 | 103.36(9)  | C23 | C14 | C15 | N16 | 179.45(8) |
| C4 | C3  | C2  | C1  | -174.77(6) | C23 | C14 | C15 | C20 | -0.68(11) |
| C4 | C5  | C6  | C7  | -1.19(10)  | C37 | C36 | C35 | C34 | -1.5(2)   |
| C9 | N10 | C1  | C11 | 175.83(6)  | C29 | C28 | C33 | C32 | 0.65(11)  |
| C9 | N10 | C1  | C2  | -2.95(9)   | C29 | C30 | C31 | C32 | -0.29(15) |
| C9 | N10 | C14 | C15 | 91.85(8)   | C35 | C34 | C39 | C38 | 2.09(15)  |
| C9 | N10 | C14 | C23 | -87.50(8)  |     |     |     |     |           |

**Table 7 Hydrogen Atom Coordinates ( $\text{\AA}\times 10^4$ ) and Isotropic Displacement Parameters ( $\text{\AA}^2\times 10^3$ ) for B-2-41 (4n).**

| Atom | x        | y       | z       | U(eq) |
|------|----------|---------|---------|-------|
| H19  | 13735.09 | 1370.03 | 2262.46 | 190   |
| H4   | 9098.57  | 3720.25 | 6135.5  | 73    |
| H7   | 12527.65 | 4838.34 | 5299.69 | 77    |
| H11A | 9157.23  | 2105.36 | 3160.89 | 79    |
| H11B | 8850.05  | 2656.75 | 2352.57 | 79    |
| H2   | 8481.59  | 3068.94 | 4584.79 | 72    |
| H6   | 12092.97 | 5122.23 | 6696    | 81    |
| H33  | 7389.44  | 3610.37 | 1643.33 | 94    |
| H17  | 13236.18 | 1535.72 | 4821.97 | 150   |
| H41A | 6620.85  | 4348.73 | 9886.07 | 257   |
| H41B | 7024.21  | 3574.92 | 9849.69 | 257   |
| H41C | 6618     | 4017.86 | 8917.41 | 257   |
| H18  | 14171.09 | 985.09  | 3777.49 | 198   |
| H39  | 6941.78  | 1052.37 | 2601.39 | 96    |
| H38  | 6249.21  | 280.95  | 1372.92 | 104   |
| H23  | 10340.65 | 3733.38 | 1711.54 | 113   |
| H37  | 5166.46  | 659.74  | -143.39 | 108   |
| H29  | 4736.04  | 3234.4  | 3058.81 | 105   |
| H32  | 6275.32  | 4608.81 | 1085.7  | 113   |
| H21  | 12516.02 | 2256.8  | 998.8   | 161   |
| H30  | 3640.11  | 4254.62 | 2476.64 | 127   |
| H31  | 4392.94  | 4930.88 | 1494.69 | 126   |
| H36  | 4795.29  | 1806.72 | -414.74 | 168   |
| H22  | 11160.51 | 3185.27 | 584.52  | 152   |



|     |         |         |         |     |
|-----|---------|---------|---------|-----|
| H35 | 5582.6  | 2589.37 | 800.26  | 141 |
| H40 | 8381.07 | 4621.04 | 9697.54 | 410 |

---

#### Benzyl 2-(1-oxo-2-(quinolin-8-yl)-1,2-dihydroisoquinolin-3-yl)acetate (4a)

Compound **4a** was prepared by the typical procedure in 0.1 mmol scale and the reaction mixture was purified by flash column chromatography (EtOAc: hexane =30:70). It is obtained as a yellow solid; 36.4 mg, 87% yield.

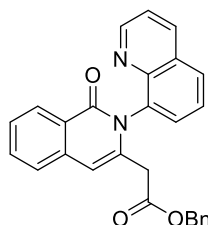

**<sup>1</sup>H NMR (400 MHz, Chloroform-*d*)**  $\delta$  8.84 (d,  $J$  = 4.0 Hz, 1H), 8.40 (d,  $J$  = 8.0 Hz, 1H), 8.22 (d,  $J$  = 8.2 Hz, 1H), 7.90 (d,  $J$  = 8.2 Hz, 1H), 7.67 (d,  $J$  = 7.6 Hz, 1H), 7.60 (d,  $J$  = 7.0 Hz, 1H), 7.55 (d,  $J$  = 7.9 Hz, 1H), 7.48 (td,  $J$  = 7.7, 3.6 Hz, 2H), 7.42 (dd,  $J$  = 8.4, 4.2 Hz, 1H), 7.33 (t,  $J$  = 5.4 Hz, 3H), 7.20-7.13 (m, 2H), 6.63 (s, 1H), 4.90 (d,  $J$  = 5.2 Hz, 2H), 3.41 (d,  $J$  = 17.0 Hz, 1H), 3.12 (d,  $J$  = 17.0 Hz, 1H). **<sup>13</sup>C NMR (101 MHz, Chloroform-*d*)**  $\delta$  169.4, 163.6, 151.6, 137.1, 136.5, 136.4, 135.7, 135.2, 132.7, 131.0, 129.7, 129.4, 128.0, 128.7, 128.6, 128.6, 128.4, 126.8, 126.3, 126.0, 125.7, 122.0, 108.1, 67.0, 40.1. HRMS (ESI): calculated for C<sub>27</sub>H<sub>20</sub>N<sub>2</sub>O<sub>3</sub> for [M+H]<sup>+</sup> 421.1547, found 421.1549.

#### Benzyl 2-(8-fluoro-1-oxo-2-(quinolin-8-yl)-1,2-dihydroisoquinolin-3-yl)acetate (4b)

Compound **4b** was prepared by the typical procedure in 0.1 mmol scale and the reaction mixture was purified by flash column chromatography (EtOAc: hexane =30:70). It is obtained as a yellow solid; 37.2 mg, 85% yield.

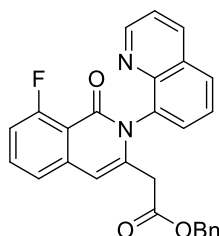

**<sup>1</sup>H NMR (400 MHz, Chloroform-*d*)**  $\delta$  8.84 (d,  $J$  = 4.0 Hz, 1H), 8.21 (d,  $J$  = 8.2 Hz, 1H), 7.89 (d,  $J$  = 8.1 Hz, 1H), 7.59 (d,  $J$  = 7.4 Hz, 2H), 7.47 (d,  $J$  = 7.8 Hz, 1H), 7.43 (dt,  $J$  = 8.2, 5.1 Hz, 1H), 7.33 (d,  $J$  = 4.8 Hz, 3H), 7.30 (d,  $J$  = 8.2 Hz, 1H), 7.20 - 7.14 (m, 2H), 7.08 (d,  $J$  = 3.3 Hz, 1H), 6.58 (s, 1H), 4.90 (d,  $J$  = 4.7 Hz, 2H), 3.38 (d,  $J$  = 16.9 Hz, 1H), 3.10 (d,  $J$  = 16.9 Hz, 1H). **<sup>13</sup>C NMR (101 MHz, Chloroform-*d*)**  $\delta$  169.1, 164.2, 161.5, 151.4, 144.3, 139.8, 137.7, 136.6, 135.2, 135.1, 133.6, 133.5, 131.6, 129.7, 129.4, 128.6, 126.3, 122.0, 121.9, 121.8, 113.8, 113.5, 107.3, 107.3, 67.0, 40.0. HRMS (ESI): calculated for C<sub>27</sub>H<sub>19</sub>FN<sub>2</sub>O<sub>3</sub> for [M+H]<sup>+</sup> 439.1453, found: 439.1455.

#### Benzyl 2-(8-bromo-1-oxo-2-(quinolin-8-yl)-1,2-dihydroisoquinolin-3-yl)acetate (3c)

Compound **3c** was prepared by the typical procedure in 0.1 mmol scale and the reaction mixture was purified by flash column chromatography (EtOAc: hexane =30:70). It is obtained as a yellow solid; 40.6 mg, 83% yield.

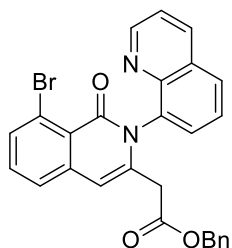

**<sup>1</sup>H NMR (400 MHz, Chloroform-*d*)**  $\delta$  8.85 (d,  $J$  = 4.0 Hz, 1H), 8.21 (d,  $J$  = 8.2 Hz, 1H), 7.89 (d,  $J$  = 8.2 Hz, 1H), 7.73 (d,  $J$  = 7.6 Hz, 1H), 7.60 (d,  $J$  = 7.3 Hz, 1H), 7.46 (dt,  $J$  = 7.4, 3.6 Hz, 2H), 7.40 (q,  $J$  = 7.7, 7.0 Hz, 2H), 7.33 (d,  $J$  = 4.7 Hz, 3H), 7.21 - 7.14 (m, 2H), 6.56 (s, 1H), 4.90 (d,  $J$  = 4.4 Hz, 2H), 3.37 (d,  $J$  = 17.0 Hz, 1H), 3.09 (d,  $J$  = 16.9 Hz, 1H). **<sup>13</sup>C NMR (101 MHz,**

**Chloroform-*d*)**  $\delta$  169.0, 161.8, 151.4, 144.2, 140.1, 137.4, 136.6, 135.4, 135.1, 133.9, 132.6, 131.5, 129.6, 129.4, 128.6, 128.6, 126.4, 126.1, 123.6, 122.9, 122.1, 107.7, 67.0, 40.0. HRMS (ESI): calculated for C<sub>27</sub>H<sub>19</sub>BrN<sub>2</sub>O<sub>3</sub> for [M+Na]<sup>+</sup> 521.0482, found: 521.0479.

### Benzyl 2-(1-oxo-2-(quinolin-8-yl)-8-(trifluoromethyl)-1,2-dihydroisoquinolin-3-yl)acetate (3d)

Compound **3d** was prepared by the typical procedure in 0.1 mmol scale and the reaction mixture was purified by flash column chromatography (EtOAc: hexane =30:70). It is obtained as a yellow solid; 43.3 mg, 89% yield.

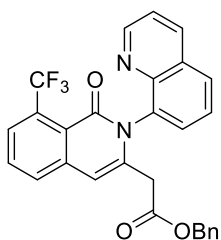

**<sup>1</sup>H NMR (400 MHz, Chloroform-*d*)**  $\delta$  8.88 (d,  $J$  = 3.9 Hz, 1H), 8.25 (d,  $J$  = 8.2 Hz, 1H), 7.94 (d,  $J$  = 7.4 Hz, 2H), 7.81-7.72 (m, 2H), 7.67 (d,  $J$  = 7.2 Hz, 1H), 7.51 (t,  $J$  = 7.8 Hz, 1H), 7.47 (dd,  $J$  = 8.5, 4.1 Hz, 1H), 7.38 (m, 3H), 7.25 - 7.16 (m, 2H), 6.68 (s, 1H), 4.95 (s, 2H), 3.45 (d,  $J$  = 17.1 Hz, 1H), 3.15 (d,  $J$  = 17.1 Hz, 1H). **<sup>13</sup>C NMR (101 MHz, Chloroform-*d*)**  $\delta$  169.0, 160.6, 151.5, 144.2,

139.8, 138.3, 136.5, 135.4, 135.1, 131.5, 131.5, 131.0, 129.7, 129.5, 128.7, 128.6, 126.5, 126.5, 126.4, 122.8, 122.1, 107.4, 67.1, 39.9. HRMS (ESI): calculated for C<sub>27</sub>H<sub>19</sub>F<sub>3</sub>N<sub>2</sub>O<sub>3</sub> for [M+H]<sup>+</sup> 489.1424, found: 489.1427.

### Benzyl 2-(8-methoxy-1-oxo-2-(quinolin-8-yl)-1,2-dihydroisoquinolin-3-yl)acetate (3e)

Compound **3e** was prepared by the typical procedure in 0.1 mmol scale and the reaction mixture was purified by flash column chromatography (EtOAc: hexane =30:70). It is obtained as a yellow solid;

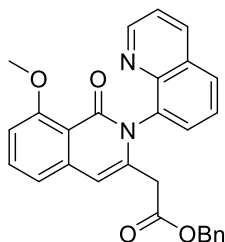

32.8 mg, 73% yield.

**<sup>1</sup>H NMR (400 MHz, Chloroform-*d*)**  $\delta$  8.88-8.83 (m, 1H), 8.26 (d,  $J$  = 8.4 Hz, 1H), 7.90 (d,  $J$  = 7.2 Hz, 2H), 7.81-7.50 (m, 2H), 7.33-7.30 (m, 5H), 7.20-7.15 (m, 2H), 7.09 (d,  $J$  = 3.4 Hz, 1H), 6.58 (s, 1H), 4.96-4.80 (m, 2H), 3.94 (s, 3H),

3.37 (d,  $J = 16.8$  Hz, 1H), 3.09 (d,  $J = 16.8$  Hz, 1H).  $^{13}\text{C-NMR}$  (101 MHz, Chloroform- $d$ )  $\delta$  169.3, 162.1, 161.5, 151.5, 144.7, 140.3, 137.1, 136.4', 136.0, 135.3, 133.4, 131.7, 129.4, 129.4, 128.7, 128.6, 128.6, 126.26, 121.9, 118.4, 115.1, 108.6, 107.7, 77.5, 77.2, 76.8, 67.0, 56.1, 40.1. HRMS (ESI): calculated for  $\text{C}_{28}\text{H}_{22}\text{N}_2\text{O}_4$  for  $[\text{M}+\text{H}]^+$  451.1661, found: 451.1659.

### Benzyl 2-(6-fluoro-1-oxo-2-(quinolin-8-yl)-1,2-dihydroisoquinolin-3-yl)acetate (3f)

Compound **3f** was prepared by the typical procedure in 0.1 mmol scale and the reaction mixture was purified by flash column chromatography (EtOAc: hexane =30:70). It is obtained as a yellow solid; 38.5 mg, 88% yield.

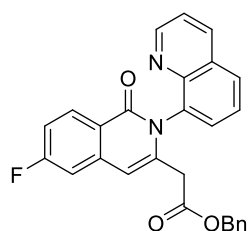

$^1\text{H-NMR}$  (400 MHz, Chloroform- $d$ )  $\delta$  8.85 (d,  $J = 3.9$  Hz, 1H), 8.40 (t,  $J = 7.2$  Hz, 1H), 8.23 (d,  $J = 8.1$  Hz, 1H), 7.92 (d,  $J = 8.1$  Hz, 1H), 7.59 (d,  $J = 7.2$  Hz, 1H), 7.48 (d,  $J = 7.9$  Hz, 1H), 7.45 (d,  $J = 6.9$  Hz, 1H), 7.33 (d,  $J = 5.2$  Hz, 3H), 7.18 (t,  $J = 7.6$  Hz, 4H), 6.57 (s, 1H), 4.90 (d,  $J = 3.9$  Hz, 2H), 3.40 (d,  $J = 17.0$  Hz, 1H), 3.10 (d,  $J = 17.0$  Hz, 1H).  $^{13}\text{C-NMR}$  (101 MHz, Chloroform- $d$ )  $\delta$  164.7, 164.4, 149.8, 146.9, 138.3, 137.9, 135.3, 132.1, 132.0, 131.4, 130.1, 128.8, 128.7, 128.7, 128.5, 128.4, 128.2, 127.2, 121.8, 119.6, 118.1, 117.8, 117.5, 111.8, 111.6, 88.1, 78.9, 67.0, 66.8. HRMS (ESI): calculated for  $\text{C}_{27}\text{H}_{19}\text{FN}_2\text{O}_3$  for  $[\text{M}+\text{H}]^+$  439.1453, found: 439.1457.

### Benzyl 2-(6-chloro-1-oxo-2-(quinolin-8-yl)-1,2-dihydroisoquinolin-3-yl)acetate (3g)

Compound **3g** was prepared by the typical procedure in 0.1 mmol scale and the reaction mixture was purified by flash column chromatography (EtOAc: hexane =30:70). It is obtained as a yellow solid; 41.0 mg, 91% yield.

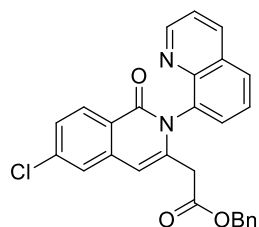

$^1\text{H-NMR}$  (400 MHz, Chloroform- $d$ )  $\delta$  8.85 (d,  $J = 3.9$  Hz, 1H), 8.31 (d,  $J = 8.5$  Hz, 1H), 8.23 (d,  $J = 8.2$  Hz, 1H), 7.91 (d,  $J = 8.2$  Hz, 1H), 7.59 (d,  $J = 7.2$  Hz, 1H), 7.53 (s, 1H), 7.48 (d,  $J = 7.7$  Hz, 1H), 7.46 - 7.40 (m, 2H), 7.33 (d,  $J = 5.0$  Hz, 3H), 7.21 - 7.13 (m, 2H), 6.53 (s, 1H), 4.90 (d,  $J = 2.9$  Hz, 2H), 3.40 (d,  $J = 17.0$  Hz, 1H), 3.11 (d,  $J = 17.0$  Hz, 1H).  $^{13}\text{C-NMR}$  (101 MHz, Chloroform- $d$ )  $\delta$  169.0, 151.5, 144.1, 139.1, 138.3, 138.0, 136.6, 135.2, 135.1, 131.3, 130.2, 129.8, 129.4, 128.6, 128.6, 127.3, 126.3,

125.2, 124.0, 122.1, 107.0, 67.0, 40.1. HRMS (ESI): calculated for C<sub>27</sub>H<sub>19</sub>ClN<sub>2</sub>O<sub>3</sub> for [M+H]<sup>+</sup> 455.1159, found: 455.1161.

### Benzyl 2-(6-bromo-1-oxo-2-(quinolin-8-yl)-1,2-dihydroisoquinolin-3-yl)acetate (3h)

Compound **3h** was prepared by the typical procedure in 0.1 mmol scale and the reaction mixture was purified by flash column chromatography (EtOAc: hexane =30:70). It is obtained as a yellow solid; 42.8 mg, 86% yield.

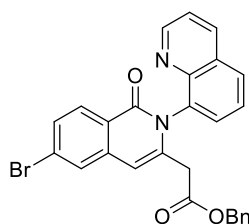

<sup>1</sup>H NMR (400 MHz, Chloroform-*d*) δ 8.84 (d, *J* = 3.9 Hz, 1H), 8.23 (d, *J* = 8.2 Hz, 2H), 7.92 (d, *J* = 8.1 Hz, 1H), 7.71 (s, 1H), 7.57 (t, *J* = 5.4 Hz, 2H), 7.48 (s, 1H), 7.44 (dd, *J* = 10.9, 5.4 Hz, 2H), 7.33 (d, *J* = 5.2 Hz, 3H), 7.17 (d, *J* = 5.7 Hz, 2H), 6.53 (s, 1H), 4.90 (d, *J* = 4.6 Hz, 2H), 3.40 (d, *J* = 17.1

Hz, 1H), 3.10 (d, *J* = 17.0 Hz, 1H). <sup>13</sup>C NMR (101 MHz, Chloroform-*d*) δ 169.0, 163.9, 151.6, 144.7, 144.4, 140.2, 137.7, 136.5, 135.7, 135.1, 132.6, 131.4, 129.6, 129.5, 128.6, 128.6, 126.7, 126.7, 126.4, 122.8, 122.1, 107.3, 67.0, 40.0. HRMS (ESI): calculated for C<sub>27</sub>H<sub>19</sub>BrN<sub>2</sub>O<sub>3</sub> for [M+Na]<sup>+</sup> 521.0482, found: 521.0480.

### Benzyl 2-(6-acetyl-1-oxo-2-(quinolin-8-yl)-1,2-dihydroisoquinolin-3-yl)acetate (3i)

Compound **3i** was prepared by the typical procedure in 0.1 mmol scale and the reaction mixture was purified by flash column chromatography (EtOAc: hexane =30:70). It is obtained as a yellow solid; 41.6 mg, 90% yield.

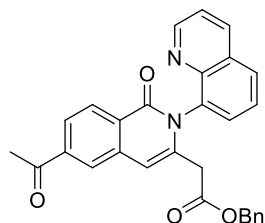

<sup>1</sup>H NMR (400 MHz, Chloroform-*d*) δ 8.84 (d, *J* = 3.9 Hz, 1H), 8.46 (d, *J* = 8.1 Hz, 1H), 8.23 (d, *J* = 8.2 Hz, 1H), 8.13 (s, 1H), 7.99 (d, *J* = 8.4 Hz, 1H), 7.92 (d, *J* = 8.2 Hz, 1H), 7.60 (d, *J* = 7.3 Hz, 1H), 7.48 (t, *J* = 7.8 Hz, 1H), 7.44 (dd, *J* = 8.2, 4.1 Hz, 1H), 7.33 (d, *J* = 5.0 Hz, 3H), 7.20 - 7.14 (m, 2H), 6.70 (s, 1H), 4.91 (s, 2H), 3.43 (d, *J* = 17.0 Hz, 1H), 3.12 (d, *J* = 17.0 Hz, 1H), 2.72 (s, 3H). <sup>13</sup>C NMR (101 MHz, Chloroform-*d*)

δ 198.0, 169.1, 163.0, 151.6, 144.2, 140.1, 137.7, 137.1, 136.6, 135.3, 135.1, 131.2, 129.9, 129.4, 129.0, 128.7, 128.6, 128.4, 126.6, 126.3, 125.5, 122.1, 108.1, 67.1, 40.1, 27.2. HRMS (ESI): calculated for C<sub>29</sub>H<sub>22</sub>N<sub>2</sub>O<sub>3</sub> for [M+H]<sup>+</sup> 463.1656, found: 463.1659.

### Benzyl 2-(6-cyano-1-oxo-2-(quinolin-8-yl)-1,2-dihydroisoquinolin-3-yl)acetate (3j)

Compound **3j** was prepared by the typical procedure in 0.1 mmol scale and the reaction mixture was purified by flash column chromatography (EtOAc: hexane =30:70-50:50). It is obtained as a yellow solid; 41.4 mg, 93% yield.

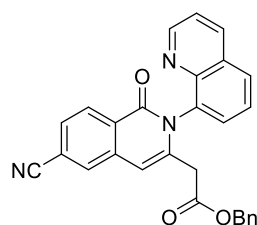

**<sup>1</sup>H-NMR (400 MHz, Chloroform-*d*)**  $\delta$  8.83 (d,  $J = 4.0$  Hz, 1H), 8.46 (d,  $J = 8.3$  Hz, 1H), 8.23 (d,  $J = 8.3$  Hz, 1H), 7.93 (d,  $J = 8.3$  Hz, 1H), 7.87 (s, 1H), 7.65 (d,  $J = 8.3$  Hz, 1H), 7.59 (d,  $J = 7.2$  Hz, 1H), 7.49 (d,  $J = 7.8$  Hz, 1H), 7.45 (dd,  $J = 8.9, 4.6$  Hz, 1H), 7.34 (d,  $J = 5.7$  Hz, 3H), 7.21 - 7.13 (m, 2H), 6.62 (s, 1H), 4.91 (s, 2H), 3.42 (d,  $J = 17.1$  Hz, 1H), 3.12 (d,  $J = 17.1$  Hz, 1H). **<sup>13</sup>C-NMR (101 MHz, Chloroform-*d*)**  $\delta$  168.8, 162.5, 151.7, 144.0, 139.1, 137.1, 136.6, 135.0, 134.9, 131.1, 130.6, 130.0, 129.5, 129.4, 128.7, 128.7, 128.5, 128.0, 126.3, 122.2, 118.3, 116.1, 106.7, 67.2, 40.0. HRMS (ESI): calculated for C<sub>28</sub>H<sub>19</sub>N<sub>3</sub>O<sub>3</sub> for [M+H]<sup>+</sup> 446.1548, found: 446.1551.

### Benzyl 2-(6-methyl-1-oxo-2-(quinolin-8-yl)-1,2-dihydroisoquinolin-3-yl)acetate (3k)

Compound **3k** was prepared by the typical procedure in 0.1 mmol scale and the reaction mixture was purified by flash column chromatography (EtOAc: hexane =30:70). It is obtained as a yellow solid; 36.0 mg, 83% yield.

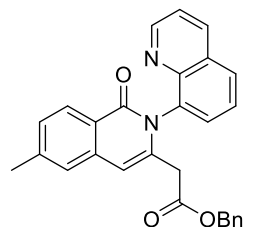

**<sup>1</sup>H-NMR (400 MHz, CDCl<sub>3</sub>)**  $\delta$  (ppm) 8.85 (dd,  $J = 4.4, 1.6$  Hz, 1H), 8.27 (d,  $J = 8.0$  Hz, 1H), 8.20 (dd,  $J = 8.4, 1.6$  Hz, 1H), 7.90 (dd,  $J = 8.4, 1.2$  Hz, 1H), 7.58 (dd,  $J = 7.2, 1.2$  Hz, 1H), 7.49-7.41 (m, 2H), 7.35-7.27 (m, 5H), 7.18-7.16 (m, 2H), 6.57 (s, 1H), 4.90-4.89 (m, 2H), 3.42 (d,  $J = 16.8$  Hz, 1H), 3.13 (d,  $J = 16.8$  Hz, 1H), 2.51 (s, 3H); **<sup>13</sup>C-NMR (101 MHz, Chloroform-*d*)**  $\delta$  169.2, 162.1, 161.3, 151.4, 144.7, 140.2, 137.1, 136.4, 135.9, 135.2, 133.4, 131.7, 129.4, 129.3, 128.6, 128.6, 128.5, 126.2, 121.8, 118.4, 115.1, 108.2, 107.6, 67.0, 56.0, 40.0. HRMS (ESI): calculated for C<sub>28</sub>H<sub>22</sub>N<sub>2</sub>O<sub>3</sub> for [M+H]<sup>+</sup> 435.1705, found: 435.1703.

### Benzyl 2-(6-cyclohexyl-1-oxo-2-(quinolin-8-yl)-1,2-dihydroisoquinolin-3-yl)acetate (3l)

Compound **3l** was prepared by the typical procedure in 0.1 mmol scale and the reaction mixture was purified by flash column chromatography (EtOAc: hexane =30:70). It is obtained as a yellow solid; 40.5 mg, 81% yield.

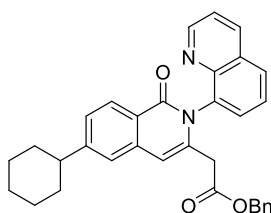

**<sup>1</sup>H NMR (400 MHz, Chloroform-*d*)**  $\delta$  8.84 (d,  $J$  = 4.3 Hz, 1H), 8.35 (d,  $J$  = 8.4 Hz, 1H), 8.16 (d,  $J$  = 8.1 Hz, 1H), 7.88 (d,  $J$  = 8.2 Hz, 1H), 7.74 (d,  $J$  = 7.4 Hz, 1H), 7.64 (t,  $J$  = 7.8 Hz, 1H), 7.56 (s, 1H), 7.53 (dd,  $J$  = 8.3, 4.3 Hz, 1H), 7.43 (d,  $J$  = 7.9 Hz, 1H), 7.31 (s, 5H), 7.14 (s, 1H), 6.52 (s, 1H), 5.18 (d,  $J$  = 12.3 Hz, 1H), 5.09 (d,  $J$  = 12.4 Hz, 1H), 2.63 (s, 1H), 1.91 (dd,  $J$  = 25.1, 11.6 Hz, 5H), 1.78 (d,  $J$  = 12.8 Hz, 1H), 1.55-1.37 (m, 5H), 1.36-1.22 (m, 2H). **<sup>13</sup>C NMR (101 MHz, Chloroform-*d*)**  $\delta$  169.4, 163.6, 153.2, 151.4, 144.4, 137.3, 136.6, 136.2, 135.7, 135.2, 131.6, 129.5, 129.4, 128.6, 128.5, 128.4, 126.5, 126.4, 123.8, 123.7, 122.0, 108.3, 67.0, 58.6, 45.0, 40.1, 34.3, 26.9, 26.2, 18.5. HRMS (ESI): calculated for C<sub>33</sub>H<sub>30</sub>N<sub>2</sub>O<sub>3</sub> for [M+H]<sup>+</sup> 503.2341, found: 503.2339.

### Benzyl 2-(6-methoxy-1-oxo-2-(quinolin-8-yl)-1,2-dihydroisoquinolin-3-yl)acetate (3m)

Compound **3m** was prepared by the typical procedure in 0.1 mmol scale and the reaction mixture was purified by flash column chromatography (EtOAc: hexane =30:70-50:50). It is obtained as a yellow solid; 35.6 mg, 79% yield.

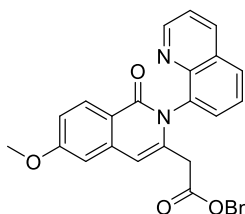

**<sup>1</sup>H-NMR (400 MHz, Chloroform-*d*)**  $\delta$  8.85 (d,  $J$  = 3.9 Hz, 1H), 8.30 (d,  $J$  = 8.9 Hz, 1H), 8.21 (d,  $J$  = 8.1 Hz, 1H), 7.89 (d,  $J$  = 8.1 Hz, 1H), 7.59 (d,  $J$  = 7.2 Hz, 1H), 7.47 (d,  $J$  = 7.8 Hz, 1H), 7.45 - 7.39 (m, 1H), 7.32 (d,  $J$  = 4.5 Hz, 3H), 7.17 (d,  $J$  = 5.5 Hz, 2H), 7.05 (d,  $J$  = 8.8 Hz, 1H), 6.91 (s, 1H), 6.55 (s, 1H), 4.90 (d,  $J$  = 5.0 Hz, 2H), 3.93 (s, 3H), 3.38 (d,  $J$  = 16.9 Hz, 1H), 3.10 (d,  $J$  = 16.9 Hz, 1H). **<sup>13</sup>C NMR (101 MHz, Chloroform-*d*)**  $\delta$  169.3, 163.2, 151.5, 144.5, 139.2, 137.1, 136.5, 135.7, 135.2, 131.5, 130.5, 129.6, 129.4, 128.6, 128.5, 126.3, 121.9, 119.5, 116.2, 107.8, 107.0, 67.0, 55.6, 40.1. HRMS (ESI): calculated for C<sub>28</sub>H<sub>21</sub>BrN<sub>2</sub>O<sub>3</sub> for [M+H]<sup>+</sup> 451.1661, found: 451.1663.

### Benzyl 2-(7-chloro-1-oxo-2-(quinolin-8-yl)-1,2-dihydroisoquinolin-3-yl)acetate (3n)

### Benzyl 2-(5-chloro-1-oxo-2-(quinolin-8-yl)-1,2-dihydroisoquinolin-3-yl)acetate (3n')

Compound **3n** and **3n'** was prepared by the typical procedure in 0.1 mmol scale and the reaction mixture was purified by flash column chromatography (EtOAc: hexane =30:70). It is obtained as a yellow solid which contained two isomers, and further purified by flash column chromatography (Ether: hecane = 30:70-100:0) to give the desired products **3n** (21 mg) in 46% yield and **3n'** (14 mg) in 31% yield.

Benzyl 2-(7-chloro-1-oxo-2-(quinolin-8-yl)-1,2-dihydroisoquinolin-3-yl)acetate (3n)

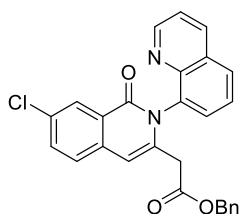

**<sup>1</sup>H-NMR (400-MHz, Chloroform-*d*)** δ 8.93 (s, 1H), 8.39 (s, 1H), 8.30 (d, *J* = 8.2 Hz, 1H), 7.97 (d, *J* = 8.2 Hz, 1H), 7.65 (t, *J* = 8.1 Hz, 2H), 7.52 (t, *J* = 6.9 Hz, 4H), 7.37 (d, *J* = 5.1 Hz, 3H), 7.21 (d, *J* = 5.7 Hz, 2H), 6.62 (s, 1H), 4.95 (m, 2H), 3.44 (d, *J* = 16.9 Hz, 1H), 3.16 (d, *J* = 17.0 Hz, 1H). **<sup>13</sup>C-NMR (101-**

**MHz, CDCl<sub>3</sub>)** δ 169.2, 164.1, 151.7, 144.4, 139.2, 138.0, 136.6, 136.3, 135.2, 134.4, 132.6, 132.3, 131.3, 129.7, 129.6, 128.7, 128.71, 128.5, 128.4, 127.5, 126.5, 126.3, 124.9, 122.1, 119.0, 108.8, 67.1, 40.2.

HRMS (ESI): calculated for C<sub>28</sub>H<sub>21</sub>ClN<sub>2</sub>O<sub>3</sub> for [M+H]<sup>+</sup> 445.1159, found: 445.1163.

Benzyl 2-(5-chloro-1-oxo-2-(quinolin-8-yl)-1,2-dihydroisoquinolin-3-yl)acetate (3n')

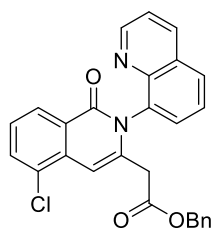

**H-NMR (400-MHz, Chloroform-*d*)** δ 8.94 (s, 1H), 8.31 (s, 1H), 8.22 (d, *J* = 8.4 Hz, 1H), 7.95-7.89 (m, 2H), 7.60 (d, *J* = 7.2 Hz, 1H), 7.49-7.41 (m, 2H), 7.34-7.29 (m, 4H), 7.20-7.17 (m, 2H), 6.60 (s, 1H), 4.96 (m, 2H), 3.45 (d, *J* = 16.9 Hz, 1H), 3.17 (d, *J* = 16.9 Hz, 1H). **<sup>13</sup>C-NMR (101-MHz, CDCl<sub>3</sub>)** δ 169.3, 163.2, 151.7,

144.6, 138.1, 136.5, 135.4, 135.2, 132.4, 131.5, 129.6, 128.7, 128.3, 128.1, 127.3, 126.3, 124.9, 122.1,

120.9, 106.8, 77.5, 76.8, 67.4, 40.5. HRMS (ESI): calculated for C<sub>28</sub>H<sub>21</sub>ClN<sub>2</sub>O<sub>3</sub> for [M+H]<sup>+</sup> 445.1159, found: 445.1162.

**Benzyl 2-(6-bromo-8-methyl-1-oxo-2-(quinolin-8-yl)-1,2-dihydroisoquinolin-3-yl)acetate (3o)**

Compound **3o** was prepared by the typical procedure in 0.1 mmol scale and the reaction mixture was purified by flash column chromatography (EtOAc: hexane =30:70). It is obtained as a yellow solid; 33.2 mg, 65% yield.

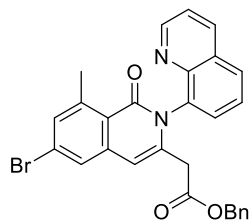

**<sup>1</sup>H-NMR (400 MHz, Chloroform-*d*)** δ 8.86 (d, *J* = 4.0 Hz, 1H), 8.22 (d, *J* = 8.2 Hz, 1H), 7.90 (d, *J* = 8.1 Hz, 1H), 7.58 (d, *J* = 7.1 Hz, 1H), 7.52 (s, 1H), 7.47 (d, *J* = 7.9 Hz, 1H), 7.43 (dd, *J* = 8.8, 4.6 Hz, 1H), 7.34 (t, *J* = 5.9 Hz, 4H), 7.17 (d, *J* = 5.7 Hz, 2H), 6.45 (s, 1H), 4.90 (d, *J* = 4.1 Hz, 2H), 3.35 (d, *J* =

17.1 Hz, 1H), 3.04 (d, *J* = 17.0 Hz, 1H), 2.80 (s, 3H). **<sup>13</sup>C-NMR (101 MHz, Chloroform-*d*)** δ 169.0, 163.9, 151.6, 144.7, 144.3, 140.2, 137.6, 136.6, 135.7, 135.1, 132.6, 131.4, 129.6, 129.5, 128.6, 128.6, 126.7, 126.7, 126.4, 122.8, 122.1, 107.3, 67.0, 39.9, 23.6. HRMS (ESI): calculated for C<sub>28</sub>H<sub>21</sub>BrN<sub>2</sub>O<sub>3</sub> for [M+H]<sup>+</sup> 513.0811, found: 513.0798.



### Benzyl 2-(1-oxo-2-(quinolin-8-yl)-1,2-dihydrobenzo[h]isoquinolin-3-yl)acetate (3p)

Compound **3p** was prepared by the typical procedure in 0.1 mmol scale and the reaction mixture was purified by flash column chromatography (EtOAc: hexane =30:70). It is obtained as a yellow solid; 33.4 mg, 71% yield.

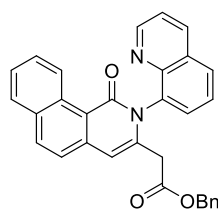

**<sup>1</sup>H-NMR (400 MHz, Chloroform-*d*)**  $\delta$  10.04 (d,  $J$  = 8.6 Hz, 1H), 8.84 (d,  $J$  = 3.8 Hz, 1H), 8.25 (d,  $J$  = 8.3 Hz, 1H), 8.07 (d,  $J$  = 8.6 Hz, 1H), 7.95 (d,  $J$  = 8.2 Hz, 1H), 7.90 (d,  $J$  = 7.9 Hz, 1H), 7.68 - 7.60 (m, 2H), 7.58 (d,  $J$  = 8.1 Hz, 2H), 7.52 (t,  $J$  = 8.0 Hz, 1H), 7.44 (dd,  $J$  = 8.2, 4.1 Hz, 1H), 7.33 (d,  $J$  = 4.8 Hz, 3H), 7.19 (d,  $J$  = 5.6 Hz, 2H), 6.80 (s, 1H), 4.94 (t,  $J$  = 10.1 Hz, 2H), 3.51 (d,  $J$  = 17.0 Hz, 1H), 3.20 (d,  $J$  = 17.0 Hz, 1H). **<sup>13</sup>C-NMR (101 MHz, Chloroform-*d*)**  $\delta$  169.1, 164.1, 151.7, 144.3, 139.1, 137.9, 136.6, 136.2, 135.2, 134.3, 132.6, 132.2, 131.3, 129.6, 129.5, 128.7, 128.6, 128.4, 128.3, 127.4, 126.4, 126.3, 124.8, 122.1, 118.9, 108.8, 67.1, 40.1. HRMS (ESI): calculated for C<sub>31</sub>H<sub>22</sub>N<sub>2</sub>O<sub>3</sub> for [M+H]<sup>+</sup> 471.1712, found: 471.1710.

### Methyl 2-(6-methyl-1-oxo-2-(quinolin-8-yl)-1,2-dihydroisoquinolin-3-yl)acetate (4a)

Compound **4a** was prepared by the typical procedure in 0.1 mmol scale and the reaction mixture was purified by flash column chromatography (EtOAc: hexane =30:70). It is obtained as a yellow solid; 26.9 mg, 75% yield.

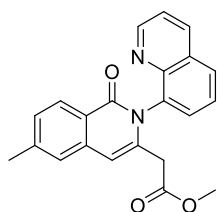

**<sup>1</sup>H-NMR (400 MHz, Chloroform-*d*)**  $\delta$  8.86 (d,  $J$  = 4.0 Hz, 1H), 8.28 (d,  $J$  = 8.1 Hz, 1H), 8.26 - 8.21 (m, 1H), 7.97 (dd,  $J$  = 8.1, 1.5 Hz, 1H), 7.72 - 7.67 (m, 1H), 7.65 (d,  $J$  = 7.8 Hz, 1H), 7.44 (dd,  $J$  = 8.3, 4.2 Hz, 1H), 7.35 (s, 1H), 7.30 (d,  $J$  = 8.1 Hz, 1H), 6.56 (s, 1H), 3.43 (s, 3H), 3.36 (d,  $J$  = 16.8 Hz, 1H), 3.09 (d,  $J$  = 16.8 Hz, 1H), 2.50 (s, 3H). **<sup>13</sup>C NMR (101-MHz, Chloroform-*d*)**  $\delta$  169.8, 151.5, 144.6, 143.3, 137.3, 136.5, 135.9, 131.4, 129.7, 129.4, 128.4, 128.3, 126.2, 125.8, 123.4, 122.0, 107.9, 52.1, 40.0, 22.0. HRMS (ESI): calculated for C<sub>23</sub>H<sub>17</sub>N<sub>3</sub>O<sub>3</sub> for [M+H]<sup>+</sup> 359.1421, found: 359.1420.

### Methyl 2-(6-methoxy-1-oxo-2-(quinolin-8-yl)-1,2-dihydroisoquinolin-3-yl)acetate (4b)

Compound **4b** was prepared by the typical procedure in 0.1 mmol scale and the reaction mixture was purified by flash column chromatography (EtOAc: hexane =30:70). It is obtained as a yellow solid; 27.0 mg, 72% yield.

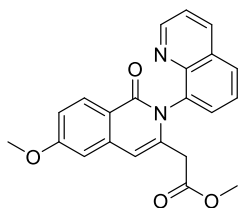

**<sup>1</sup>H-NMR (400 MHz, Chloroform-*d*)** δ 8.87 (dd, *J* = 4.4, 1.6 Hz, 1H), 8.31 (d, *J* = 8.8 Hz, 1H), 8.24 (dd, *J* = 8.4, 1.8 Hz, 1H), 7.97 (dd, *J* = 8.1, 1.5 Hz, 1H), 7.73 - 7.67 (m, 1H), 7.65 (t, *J* = 7.7 Hz, 1H), 7.44 (dd, *J* = 8.3, 4.2 Hz, 1H), 7.05 (dd, *J* = 8.8, 2.6 Hz, 1H), 6.93 (d, *J* = 2.5 Hz, 1H), 6.56 (s, 1H), 3.92 (s, 3H), 3.43 (s, 3H), 3.35 (d, *J* = 16.8 Hz, 1H), 3.09 (d, *J* = 16.8 Hz, 1H). **<sup>13</sup>C-NMR (100 MHz, Chloroform-*d*)** δ 169.8, 163.3, 163.2, 151.5, 144.5, 139.2, 137.2, 136.6, 135.8, 131.4, 130.5, 129.7, 129.4, 126.2, 122.0, 119.5, 116.2, 107.8, 107.0, 55.6, 52.2, 40.0. HRMS (ESI): calculated for C<sub>22</sub>H<sub>18</sub>N<sub>2</sub>O<sub>4</sub> for [M+Na]<sup>+</sup> 375.1345, found: 375.1347.

#### Ethyl 2-(1-oxo-2-(quinolin-8-yl)-1,2-dihydroisoquinolin-3-yl)acetate (4c)

Compound **4c** was prepared by the typical procedure in 0.1 mmol scale and the reaction mixture was purified by flash column chromatography (EtOAc: hexane =40:60-60:40). It is obtained as a yellow solid; 22.4 mg, 65% yield.

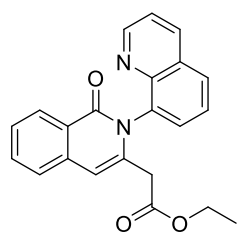

**<sup>1</sup>H-NMR (400 MHz, Chloroform-*d*)** δ 8.91 (d, *J* = 4.2 Hz, 1H), 8.44 (d, *J* = 8.0 Hz, 1H), 8.30 (d, *J* = 8.3 Hz, 1H), 8.02 (d, *J* = 8.2 Hz, 1H), 7.77 (d, *J* = 7.2 Hz, 1H), 7.74 - 7.67 (m, 2H), 7.62 (d, *J* = 8.1 Hz, 1H), 7.55 - 7.50 (m, 1H), 7.50 - 7.46 (m, 1H), 6.69 (s, 1H), 3.95 (q, *J* = 7.2 Hz, 2H), 3.41 (d, *J* = 16.9 Hz, 1H), 3.13 (d, *J* = 16.9 Hz, 1H), 1.11 (t, *J* = 7.1 Hz, 3H). **<sup>13</sup>C-NMR (101 MHz, Chloroform-*d*)** δ 169.4, 163.6, 151.5, 144.4, 137.1, 136.6, 136.4, 135.7, 132.6, 131.3, 129.6, 129.3, 128.3, 126.7, 126.2, 125.9, 125.5, 121.9, 107.9, 61.1, 40.1, 13.9. HRMS (ESI): calculated for C<sub>22</sub>H<sub>19</sub>N<sub>2</sub>O<sub>3</sub>P for [M+H]<sup>+</sup> 359.1341, found: 359.1339.

#### Ethyl 2-(6-methoxy-1-oxo-2-(quinolin-8-yl)-1,2-dihydroisoquinolin-3-yl)acetate (4d)

Compound **4d** was prepared by the typical procedure in 0.1 mmol scale and the reaction mixture was purified by flash column chromatography (EtOAc: hexane =30:70). It is obtained as a yellow solid;

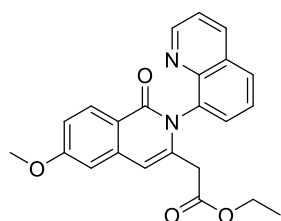

29.4 mg, 76% yield.  
**<sup>1</sup>H-NMR (400 MHz, Chloroform-*d*)** δ 8.91 (dd, *J* = 4.3, 1.8 Hz, 1H), 8.35 (d, *J* = 8.8 Hz, 1H), 8.29 (dd, *J* = 8.4, 1.6 Hz, 1H), 8.01 (d, *J* = 8.1 Hz, 1H), 7.76 (d, *J* = 6.8 Hz, 1H), 7.69 (d, *J* = 7.8 Hz, 1H), 7.49 (dd, *J* = 8.3, 4.2 Hz, 1H), 7.10 (dd, *J* = 8.8, 2.5 Hz, 1H), 6.98 (d, *J* = 2.5 Hz, 1H), 6.61 (s, 1H), 3.96 - 3.92 (m, 2H), 3.38 (d, *J*

= 16.8 Hz, 1H), 3.11 (d,  $J = 16.8$  Hz, 1H), 1.11 (t,  $J = 7.1$  Hz, 3H).  $^{13}\text{C}$ -NMR (101 MHz, Chloroform-*d*) 169.5, 163.7, 151.7, 144.6, 137.2, 136.7, 136.5, 135.9, 132.7, 131.5, 129.7, 129.5, 128.4, 126.8, 126.3, 126.1, 125.7, 122.1, 108.0, 61.3, 40.2, 29.8, 14.1. HRMS (ESI): calculated for  $\text{C}_{23}\text{H}_{20}\text{N}_2\text{O}_4$  for  $[\text{M}+\text{H}]^+$  389.1486, found: 389.1489.

#### Ethyl 2-(6-cyano-1-oxo-2-(quinolin-8-yl)-1,2-dihydroisoquinolin-3-yl)acetate (4e)

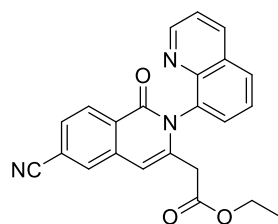

Compound **4e** was prepared by the typical procedure in 0.1 mmol scale and the reaction mixture was purified by flash column chromatography (EtOAc: hexane =30:70). It is obtained as a yellow solid; 27.6 mg, 72% yield.

$^1\text{H}$ -NMR (400 MHz, Chloroform-*d*)  $\delta$  8.90 (d,  $J = 4.6$  Hz, 1H), 8.52 (d,  $J = 8.3$  Hz, 1H), 8.32 (d,  $J = 8.1$  Hz, 1H), 8.05 (d,  $J = 8.1$  Hz, 1H), 7.95 (s, 1H), 7.76 (d,  $J = 7.2$  Hz, 1H), 7.71 (dt,  $J = 7.7, 3.4$  Hz, 2H), 7.52 (dd,  $J = 8.3, 4.2$  Hz, 1H), 6.69 (s, 1H), 3.96 (q,  $J = 7.1$  Hz, 2H), 3.42 (d,  $J = 17.0$  Hz, 1H), 3.13 (d,  $J = 17.0$  Hz, 1H), 1.12 (t,  $J = 7.1$  Hz, 3H).  $^{13}\text{C}$ -NMR (101 MHz, Chloroform-*d*)  $\delta$  168.9, 162.4, 151.6, 144.0, 139.2, 137.1, 136.5, 135.0, 131.0, 130.5, 130.0, 129.5, 129.4, 128.4, 127.9, 126.2, 122.1, 118.3, 116.1, 106.6, 61.3, 40.0, 13.9. HRMS (ESI): calculated for  $\text{C}_{23}\text{H}_{17}\text{N}_3\text{O}_3$  for  $[\text{M}+\text{H}]^+$  406.1173, found: 406.1169.

#### Phenyl 2-(6-methoxy-1-oxo-2-(quinolin-8-yl)-1,2-dihydroisoquinolin-3-yl)acetate (4f)

Compound **4f** was prepared by the typical procedure in 0.1 mmol scale and the reaction mixture was purified by flash column chromatography (EtOAc: hexane =30:70). It is obtained as a yellow solid; 37.1 mg, 85% yield.

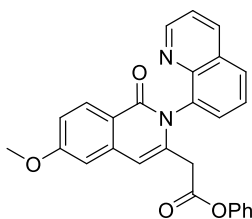

$^1\text{H}$  NMR (400 MHz, Chloroform-*d*)  $\delta$  8.89 (dd,  $J = 4.4, 1.7$  Hz, 1H), 8.33 (d,  $J = 8.8$  Hz, 1H), 8.26 (dd,  $J = 8.4, 1.8$  Hz, 1H), 8.01 (d,  $J = 8.2$  Hz, 1H), 7.79 (d,  $J = 7.1$  Hz, 1H), 7.69 (t,  $J = 7.8$  Hz, 1H), 7.45 (dd,  $J = 8.4, 4.2$  Hz, 1H), 7.32 (t,  $J = 7.9$  Hz, 2H), 7.20 (t,  $J = 7.3$  Hz, 1H), 7.07 (dd,  $J = 8.8, 2.5$  Hz, 1H), 6.95 (d,  $J = 2.5$  Hz, 1H), 6.84 (d,  $J = 8.0$  Hz, 2H), 6.66 (s, 1H), 3.93 (s, 3H), 3.61 (d,  $J = 17.2$  Hz, 1H), 3.33 (d,  $J = 17.2$  Hz, 1H).  $^{13}\text{C}$  NMR (101 MHz, Chloroform-*d*)  $\delta$  168.0, 163.4, 163.3, 151.8, 150.4, 144.7, 139.2, 136.7, 136.6, 135.9, 131.8, 130.6, 129.9, 129.6, 129.6, 129.5, 126.5, 126.16, 122.1, 121.2, 119.6, 116.4, 108.1, 107.1, 55.7, 40.2. HRMS (ESI): calculated for  $\text{C}_{27}\text{H}_{20}\text{N}_2\text{O}_4$  for  $[\text{M}+\text{H}]^+$  437.1493, found: 437.1502.

### Phenyl 2-(1-oxo-2-(quinolin-8-yl)-1,2-dihydrobenzo[*g*]isoquinolin-3-yl)acetate (4g)

Compound **4g** was prepared by the typical procedure in 0.1 mmol scale and the reaction mixture was purified by flash column chromatography (EtOAc: hexane =30:70). It is obtained as a yellow solid; 45.6 mg, 82% yield.

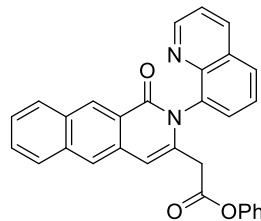

**<sup>1</sup>H-NMR (400 MHz, Chloroform-*d*)**  $\delta$  9.07 (s, 1H), 8.94 (d, *J* = 4.2 Hz, 1H), 8.33 (d, *J* = 8.2 Hz, 1H), 8.13 - 8.06 (m, 4H), 8.01 (d, *J* = 8.4 Hz, 1H), 7.90 (d, *J* = 7.1 Hz, 1H), 7.76 (t, *J* = 7.8 Hz, 1H), 7.64 (t, *J* = 7.6 Hz, 1H), 7.56 (d, *J* = 7.7 Hz, 1H), 7.53 - 7.49 (m, 1H), 7.37 (t, *J* = 7.9 Hz, 2H), 7.25 (t, *J* = 7.5

Hz, 1H), 6.92-6.87 (m, 3H), 3.71 (d, *J* = 17.3 Hz, 1H), 3.41 (d, *J* = 17.3 Hz, 1H). **<sup>13</sup>C-NMR (101 MHz, CDCl<sub>3</sub>)**  $\delta$  168.2, 164.2, 151.8, 150.4, 144.8, 136.7, 135.8, 134.9, 133.0, 132.1, 131.9, 129.9, 129.9, 129.8, 129.6, 129.5, 128.3, 127.7, 126.5, 126.1, 126.0, 124.3, 124.2, 122.2, 121.3, 108.5, 77.5, 77.2, 76.8, 40.3. HRMS (ESI): calculated for C<sub>30</sub>H<sub>20</sub>N<sub>2</sub>O<sub>3</sub> for [M+H]<sup>+</sup> 457.1549, found: 457.1551.

### Phenyl 2-(4-oxo-5-(quinolin-8-yl)-4,5-dihydrothieno[3,2-*c*]pyridin-6-yl)acetate (4h)

Compound **4h** was prepared by the typical procedure in 0.1 mmol scale and the reaction mixture was purified by flash column chromatography (EtOAc: hexane =30:70). It is obtained as a yellow solid; 25.7 mg, 62% yield.

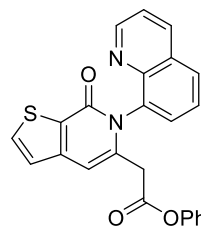

**<sup>1</sup>H NMR (400 MHz, Chloroform-*d*)**  $\delta$  8.98 (d, *J* = 4.0 Hz, 1H), 8.33 (d, *J* = 8.4 Hz, 1H), 8.22 (d, *J* = 8.0 Hz, 1H), 7.75 (d, *J* = 8.4 Hz, 1H), 7.89 (d, *J* = 7.2 Hz, 1H), 7.75 (t, *J* = 7.8 Hz, 1H), 7.65 (t, *J* = 7.6 Hz, 1H), 7.59-7.32 (m, 3H), 7.21-7.08 (m, 4H), 6.98 (s, 1H), 3.62 (d, *J* = 17.2 Hz, 1H), 3.35 (d, *J* = 17.2 Hz, 1H). **<sup>13</sup>C NMR**

**(101 MHz, Chloroform-*d*)**  $\delta$  167.8, 159.5, 151.7, 150.2, 145.2, 144.3, 137.4, 136.5, 135.2, 133.9, 131.6, 130.0, 129.7, 129.4, 129.4, 126.3, 126.0, 124.4, 122.1, 121.1, 105.3, 40.1. HRMS (ESI): calculated for C<sub>24</sub>H<sub>18</sub>N<sub>2</sub>O<sub>3</sub>S for [M+H]<sup>+</sup> 415.1110, found: 415.1109.

### 3-((Diphenylphosphoryl)methyl)-2-(quinolin-8-yl)isoquinolin-1(2*H*)-one (4i)

Compound **4i** was prepared by the typical procedure in 0.1 mmol scale and the reaction mixture was purified by flash column chromatography (EtOAc: hexane =40:60-60:40). It is obtained as a yellow solid; 40.0 mg, 83% yield.

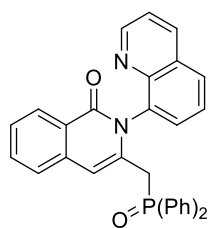

**<sup>1</sup>H-NMR (400 MHz, Chloroform-*d*)**  $\delta$  8.84 (dd,  $J = 4.2, 1.7$  Hz, 1H), 8.33 (dd,  $J = 8.0, 1.2$  Hz, 1H), 8.23 (dd,  $J = 8.3, 1.7$  Hz, 1H), 7.92 (dd,  $J = 8.3, 1.4$  Hz, 1H), 7.67 - 7.50 (m, 6H), 7.49 - 7.32 (m, 11H), 7.19 (dd,  $J = 7.3, 1.4$  Hz, 1H), 6.83 (d,  $J = 3.0$  Hz, 1H), 3.42 (ddd,  $J = 15.9, 14.8, 1.1$  Hz, 1H), 3.03 (dd,  $J = 16.0, 12.6$  Hz, 1H). **<sup>13</sup>C-NMR (101 MHz, Chloroform-*d*)**  $\delta$  163.7, 151.6, 144.5, 136.7, 135.7, 134.2, 134.1, 132.7, 132.3, 132.3, 132.2, 132.2, 132.0, 131.7, 131.5, 131.4, 131.0, 130.9, 129.4, 129.3, 128.9, 128.8, 128.8, 128.7, 128.2, 126.7, 126.6, 126.2, 125.4, 122.0, 108.1(d), 35.2, 34.6. HRMS (ESI): calculated for C<sub>31</sub>H<sub>23</sub>N<sub>2</sub>O<sub>3</sub>P for [M+H]<sup>+</sup> 509.1416, found: 509.1412.

### 3-((Diphenylphosphoryl)methyl)-6-methoxy-2-(quinolin-8-yl)isoquinolin-1(2H)-one (4j)

Compound **4j** was prepared by the typical procedure in 0.1 mmol scale and the reaction mixture was purified by flash column chromatography (EtOAc: hexane =40:60-60:40). It is obtained as a yellow solid; 47.5 mg, 92% yield.

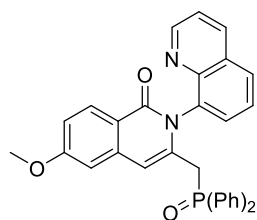

**<sup>1</sup>H-NMR (400 MHz, Chloroform-*d*)**  $\delta$  8.85 (dd,  $J = 4.2, 1.7$  Hz, 1H), 8.27 - 8.20 (m, 2H), 7.92 (dd,  $J = 8.3, 1.4$  Hz, 1H), 7.59 - 7.47 (m, 6H), 7.46 - 7.40 (m, 4H), 7.40 - 7.34 (m, 4H), 7.10 (dd,  $J = 7.3, 1.4$  Hz, 1H), 7.01 (dd,  $J = 8.9, 2.5$  Hz, 1H), 6.87 (dd,  $J = 7.6, 2.7$  Hz, 2H), 3.91 (s, 3H), 3.45 - 3.34 (m, 1H), 3.01 (dd,  $J = 16.1, 12.2$  Hz, 1H). **<sup>13</sup>C-NMR (101 MHz, Chloroform-*d*)**  $\delta$  163.2, 163.0, 151.4, 144.4, 136.3, 135.6, 134.6, 132.2, 132.2, 132.1, 132.1, 131.5, 131.5, 131.3, 131.2, 130.9, 130.8, 130.1, 129.2, 129.1, 128.7, 128.7, 128.6, 128.6, 126.4, 121.9, 119.1, 116.2, 107.9, 107.8, 106.8, 55.5, 35.0, 34.4. HRMS (ESI): calculated for C<sub>32</sub>H<sub>25</sub>N<sub>2</sub>O<sub>3</sub>P for [M+H]<sup>+</sup> 539.1495, found: 539.1498.

### 6-Cyclohexyl-3-((diphenylphosphoryl)methyl)-2-(quinolin-8-yl)isoquinolin-1(2H)-one (4k)

Compound **4k** was prepared by the typical procedure in 0.1 mmol scale and the reaction mixture was purified by flash column chromatography (EtOAc: hexane = 40:60-60:40). It is obtained as a yellow solid; 48.3 mg, 85% yield.

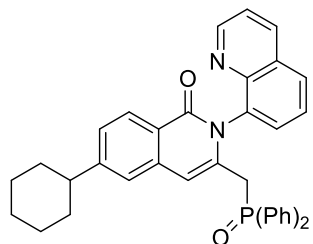

**<sup>1</sup>H-NMR (400 MHz, Chloroform-*d*)**  $\delta$  8.87 (dd,  $J = 4.3, 1.6$  Hz, 1H), 8.29 (dd,  $J = 8.3, 1.6$  Hz, 1H), 8.23 (d,  $J = 8.2$  Hz, 1H), 7.93 (dd,  $J = 8.3, 1.3$  Hz, 1H), 7.79 - 7.71 (m, 1H), 7.64 - 7.52 (m, 5H), 7.50 - 7.41 (m, 5H), 7.37 (ddd,  $J = 10.6, 5.8, 2.4$  Hz, 4H), 7.30 (dd,  $J = 8.3, 1.6$  Hz, 1H),

7.25 (d,  $J = 4.6$  Hz, 1H), 6.79 (d,  $J = 3.0$  Hz, 1H), 3.47 (t,  $J = 15.3$  Hz, 1H), 3.01 (dd,  $J = 16.0, 12.6$  Hz, 1H), 2.61 (ddd,  $J = 11.7, 8.0, 3.2$  Hz, 1H), 1.95 - 1.84 (m, 4H), 1.83 - 1.73 (m, 1H), 1.54 - 1.36 (m, 5H), 1.32 - 1.23 (m, 3H).  $^{13}\text{C-NMR}$  (101 MHz, Chloroform-*d*)  $\delta$  163.6, 153.1, 150.86, 137.3, 137.0, 135.2, 133.7, 132.3, 132.2, 132.21, 132.1, 132.1, 132.0, 131.4, 131.4, 131.3, 131.3, 130.9, 130.8, 129.2, 129.2, 128.8, 128.77, 128.7, 128.6, 128.5, 128.4, 128.1, 126.8, 126.3, 123.7, 123.3, 121.9, 108.5, 108.4, 44.8, 35.1, 34.4, 34.1, 26.8, 26.1. HRMS (ESI): calculated for  $\text{C}_{37}\text{H}_{33}\text{N}_2\text{O}_2\text{P}$  for  $[\text{M}+\text{H}]^+$  591.2203, found: 591.2205.

### 6-Bromo-3-((diphenylphosphoryl)methyl)-8-methyl-2-(quinolin-8-yl)isoquinolin-1(2H)-one (4l)

Compound **4l** was prepared by the typical procedure in 0.1 mmol scale and the reaction mixture was purified by flash column chromatography (EtOAc: hexane =40:60-60:40). It is obtained as a yellow solid; 45.7 mg, 79% yield.

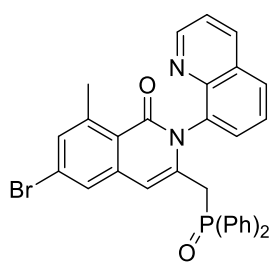

$^1\text{H-NMR}$  (400 MHz, Chloroform-*d*)  $\delta$  8.86 (dd,  $J = 4.2, 1.7$  Hz, 1H), 8.25 (dd,  $J = 8.3, 1.7$  Hz, 1H), 7.93 (dd,  $J = 8.3, 1.3$  Hz, 1H), 7.81 - 7.70 (m, 4H), 7.62 - 7.50 (m, 6H), 7.46 (dd,  $J = 8.6, 4.5, 2.9$  Hz, 7H), 7.40 - 7.32 (m, 5H), 7.30 - 7.26 (m, 1H), 6.57 (d,  $J = 3.0$  Hz, 1H), 5.85 (td,  $J = 6.8, 4.0$  Hz, 1H), 4.89 (dd,  $J = 11.2, 6.8$  Hz, 2H), 3.48 - 3.31 (m, 1H), 2.97 (dd,  $J = 15.9, 12.9$  Hz, 1H), 2.74 (s, 3H).  $^{13}\text{C-NMR}$  (101 MHz, Chloroform-*d*)  $\delta$  151.3, 144.4, 144.0, 136.8, 135.5, 132.9, 132.3, 132.3, 132.2, 132.1, 132.0, 132.0, 131.9, 131.4, 131.3, 131.3, 131.2, 130.8, 130.7, 129.3, 129.2, 128.8, 128.8, 128.7, 128.6, 128.5, 128.4, 126.7, 126.6, 126.5, 122.4, 122.0, 107.2, 107.1, 85.1, 84.0, 35.1, 34.4, 23.5. HRMS (ESI): calculated for  $\text{C}_{32}\text{H}_{24}\text{BrN}_2\text{O}_2\text{P}$  for  $[\text{M}+\text{Na}]^+$  601.0662, found: 601.0659.

### 3-((diphenylphosphoryl)methyl)-2-(quinolin-8-yl)-8-(trifluoromethyl)isoquinolin-1(2H)-one (4m)

Compound **4m** was prepared by the typical procedure in 0.1 mmol scale and the reaction mixture was purified by flash column chromatography (silica gel, petroleum ether/ ethyl acetate = 1:1 to 1:2). It is obtained as a yellow solid; 46.1 mg, 83% yield.

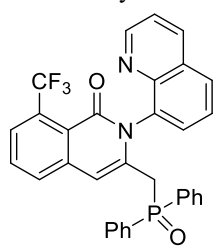

$^1\text{H-NMR}$  (400 MHz, Chloroform-*d*)  $\delta$   $^1\text{H NMR}$  (400 MHz,  $\text{CDCl}_3$ )  $\delta$  8.85 (d,  $J = 4.0$  Hz, 1H), 8.25 (dd,  $J = 8.0, 4.0$  Hz, 1H), 7.92 (d,  $J = 8.0$  Hz, 1H), 7.85 (dd,  $J = 8.0, 4.0$  Hz, 1H), 7.67-7.34 (m, 15H), 7.30 (d,  $J = 8.0$  Hz, 1H), 6.85 (s, 1H), 3.37 (dd,  $J = 15.9, 8.0$  Hz, 1H), 3.00 (dd,  $J = 16.0, 8.0$  Hz, 1H).  $^{13}\text{C NMR}$

(101 MHz, CDCl<sub>3</sub>)  $\delta$  160.7, 151.5, 144.4, 136.5, 136.3, 135.5, 132.9, 132.4, 131.9, 131.8, 131.5, 131.4, 131.3, 131.2, 130.99, 130.89, 130.8, 129.5, 129.5, 129.0, 128.9, 128.86, 128.8, 126.8, 126.4, 122.5, 122.1, 107.4, 107.38, 35.18, 34.52. HRMS (ESI): calculated for C<sub>32</sub>H<sub>23</sub>F<sub>3</sub>N<sub>2</sub>O<sub>2</sub>P for [M+H]<sup>+</sup> 555.1451, found: 555.1450.

### 3-((Diphenylphosphoryl)methyl)-6-nitro-2-(quinolin-8-yl)isoquinolin-1(2H)-one (4n)

Compound **4n** was prepared by the typical procedure in 0.1 mmol scale and the reaction mixture was purified by flash column chromatography (silica gel, petroleum ether/ ethyl acetate = 1:1 to 1:2). It is obtained as a yellow solid; 48.3 mg, 91% yield.

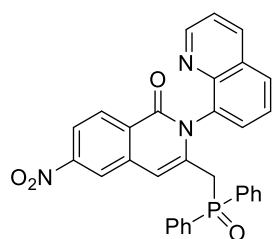

<sup>1</sup>H-NMR (400 MHz, Chloroform-*d*)  $\delta$  8.85 (d, *J* = 4.0 Hz, 1H), 8.45 (*J* = 4.0, 1H), 8.28-8.27 (m, 2H), 8.15 (dd, *J* = 8.0, 4.0 Hz, 1H), 7.98 (d, *J* = 4.0 Hz, 1H), 7.77-7.73 (m, 3H), 7.63 - 7.45 (m, 13H), 7.37-7.35 (m, 3H), 6.78 (d, *J* = 4.0 Hz, 1H), 3.45 (dd, *J* = 15.9, 8.0 Hz, 1H), 3.07 (dd, *J* = 16.0, 8.0 Hz, 1H). <sup>13</sup>C NMR (101 MHz, CDCl<sub>3</sub>)  $\delta$  169.4, 151.6, 144.6, 143.3, 137.3,

136.5, 136.5, 135.8, 135.3, 131.5, 129.6, 129.4, 128.68, 128.65, 128.6, 128.5, 128.4, 126.4, 125.8, 123.5, 122.0, 108.0, 67.0, 40.2, 22.0. HRMS (ESI): calculated for C<sub>31</sub>H<sub>22</sub>N<sub>3</sub>O<sub>4</sub>P for [M+H]<sup>+</sup> 532.1431, found: 532.1429.

### Ethyl 3-(1-oxo-2-(quinolin-8-yl)-1,2-dihydroisoquinolin-3-yl)propanoate (4o)

Compound **4o** was prepared by the typical procedure in 0.1 mmol scale and the reaction mixture was purified by flash column chromatography (EtOAc: hexane =40:60). It is obtained as a yellow solid; 22.7 mg, 61% yield.

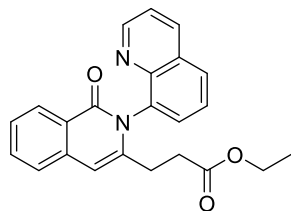

<sup>1</sup>H-NMR (400 MHz, Chloroform-*d*)  $\delta$  8.89 (d, *J* = 5.0 Hz, 1H), 8.29 (d, *J* = 8.1 Hz, 1H), 8.25 (d, *J* = 8.1 Hz, 1H), 7.99 (dd, *J* = 8.0, 1.8 Hz, 1H), 7.77 - 7.68 (m, 2H), 7.47 (dd, *J* = 8.3, 4.1 Hz, 1H), 7.32 (s, 1H), 7.27 (s, 1H), 6.45 (s, 1H), 4.02 (qd, *J* = 7.1, 2.4 Hz, 2H), 2.60 - 2.36 (m, 7H), 1.16 (t, *J* = 7.2 Hz, 3H). <sup>13</sup>C-NMR (101 MHz, Chloroform-*d*)  $\delta$  172.2, 163.9, 150.9, 143.3, 142.2, 137.5, 131.3,

129.7, 129.5, 128.3, 128.2, 127.1, 125.7, 123.0, 122.1, 104.7, 77.5, 77.2, 76.8, 60.8, 32.6, 28.4, 22.0, 14.3. HRMS (ESI): calculated for C<sub>23</sub>H<sub>20</sub>N<sub>2</sub>O<sub>3</sub> for [M+H]<sup>+</sup> 373.1557, found: 373.1555.

#### Ethyl 3-(6-methoxy-1-oxo-2-(quinolin-8-yl)-1,2-dihydroisoquinolin-3-yl)propanoate (4p)

Compound **4p** was prepared by the typical procedure in 0.1 mmol scale and the reaction mixture was purified by flash column chromatography (EtOAc: hexane =40:60). It is obtained as a yellow solid; 26.1 mg, 65% yield.

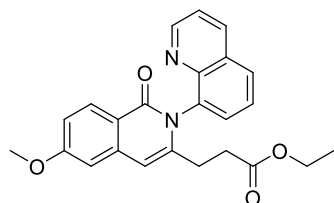

**<sup>1</sup>H-NMR (400 MHz, Chloroform-*d*)**  $\delta$  8.90 - 8.84 (m, 1H), 8.28 (d,  $J$  = 8.8 Hz, 1H), 8.26 - 8.22 (m, 1H), 7.97 (dd,  $J$  = 8.0, 1.6 Hz, 1H), 7.77 - 7.66 (m, 2H), 7.44 (dd,  $J$  = 8.3, 4.2 Hz, 1H), 7.02 (dd,  $J$  = 9.0, 2.5 Hz, 1H), 6.90 (d,  $J$  = 2.6 Hz, 1H), 6.44 (s, 1H), 4.08 - 3.98 (m, 2H), 3.93 (s, 3H), 2.58 - 2.34 (m, 4H), 1.15 (t,  $J$  = 7.1 Hz, 3H). **<sup>13</sup>C-NMR (101 MHz, Chloroform-*d*)**  $\delta$  172.2, 163.5, 163.2, 151.2, 143.0, 139.5, 137.4, 136.1, 131.1, 130.5, 129.6, 129.5, 126.9, 122.1, 119.1, 115.9, 106.8, 104.5, 77.5, 77.4, 77.2, 76.8, 60.8, 55.6, 32.7, 28.5, 14.2. HRMS (ESI): calculated for C<sub>22</sub>H<sub>18</sub>N<sub>2</sub>O<sub>4</sub> for [M+H]<sup>+</sup> 403.1665, found: 403.1668.

#### Ethyl (*E*)-2-(1-oxo-2-(quinolin-8-yl)-1,4-dihydroisoquinolin-3(2*H*)-ylidene)propanoate (4q)

Compound **5g** was prepared by the typical procedure in 0.1 mmol scale and the reaction mixture was purified by flash column chromatography (EtOAc: hexane =50:50). It is obtained as a yellow solid;

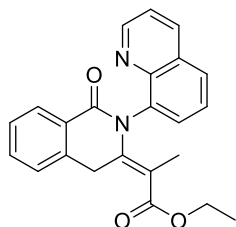

27.0 mg, 73% yield. **<sup>1</sup>H NMR (400 MHz, Chloroform-*d*)**  $\delta$  8.99 (s, 1H), 8.32 (d,  $J$  = 7.8 Hz, 1H), 8.12 (d,  $J$  = 7.6 Hz, 1H), 7.94 (d,  $J$  = 7.4 Hz, 1H), 7.87 (d,  $J$  = 8.1 Hz, 1H), 7.69 (q,  $J$  = 7.7, 7.0 Hz, 1H), 7.51 (t,  $J$  = 7.5 Hz, 2H), 7.39 (t,  $J$  = 7.7 Hz, 1H), 7.32 (d,  $J$  = 7.6 Hz, 1H), 4.89 (d,  $J$  = 16.0 Hz, 1H), 4.57 (s, 1H), 4.16 (q,  $J$  = 7.2 Hz, 2H), 1.29 (s, 3H), 1.27 - 1.24 (m, 3H). **<sup>13</sup>C NMR (101 MHz, CDCl<sub>3</sub>)**  $\delta$  169.3, 164.5, 150.2, 148.7, 143.6, 138.5, 137.7, 136.3, 132.7, 131.2, 129.2, 128.8, 128.7, 127.6, 127.1, 126.8, 125.9, 121.5, 116.2, 77.5, 77.2, 76.8, 60.7, 34.9, 15.9, 14.3. HRMS (ESI): calculated for C<sub>23</sub>H<sub>20</sub>N<sub>2</sub>O<sub>3</sub> for [M+H]<sup>+</sup> 373.1547, found: 373.1550.

#### Ethyl (*E*)-2-(8-fluoro-1-oxo-2-(quinolin-8-yl)-1,4-dihydroisoquinolin-3(2*H*)-ylidene)propanoate (4r)

Compound **5h** was prepared by the typical procedure in 0.1 mmol scale and the reaction mixture was purified by flash column chromatography (EtOAc: hexane =30:70). It is obtained as a yellow solid; 25.4 mg, 65% yield.



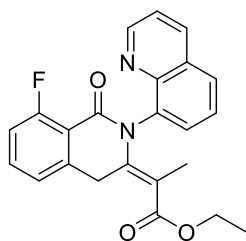

**<sup>1</sup>H-NMR (400 MHz, Chloroform-*d*)**  $\delta$  8.87 (d,  $J$  = 3.8 Hz, 1H), 8.17 (d,  $J$  = 8.2 Hz, 1H), 7.85 (d,  $J$  = 7.6 Hz, 1H), 7.82 (d,  $J$  = 8.0 Hz, 1H), 7.74 (d,  $J$  = 7.4 Hz, 1H), 7.62 (t,  $J$  = 7.9 Hz, 1H), 7.57 (d,  $J$  = 8.4 Hz, 2H), 7.40 (dd,  $J$  = 8.2, 4.0 Hz, 1H), 4.99 (d,  $J$  = 16.1 Hz, 1H), 4.68 (d,  $J$  = 16.2 Hz, 1H), 4.16 (q,  $J$  = 6.8 Hz, 2H), 1.32 (s, 3H), 1.24 (t,  $J$  = 7.3 Hz, 3H). **<sup>13</sup>C-NMR (101 MHz, Chloroform-*d*)**  $\delta$  169.0, 163.9, 151.6, 144.7, 144.4, 140.2, 137.7, 136.5, 135.7, 135.1, 132.2, 131.4, 129.6, 129.5, 128.6, 128.6, 126.7, 126.7, 126.4, 122.8, 122.1, 107.3, 77.4, 77.1, 76.8, 67.0, 40.0, 23.6. HRMS (ESI): calculated for C<sub>23</sub>H<sub>19</sub>FN<sub>2</sub>O<sub>3</sub> for [M+H]<sup>+</sup> 391.1465, found: 391.1461.

**Ethyl (E)-2-(1-oxo-2-(quinolin-8-yl)-8-(trifluoromethyl)-1,4-dihydroisoquinolin-3(2H)-ylidene)propanoate (4s)**

Compound **5i** was prepared by the typical procedure in 0.1 mmol scale and the reaction mixture was purified by flash column chromatography (EtOAc: hexane =50:50). It is obtained as a yellow solid; 34.3 mg, 78% yield.

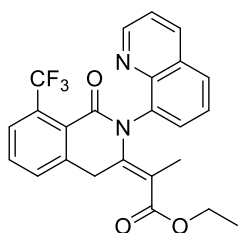

**<sup>1</sup>H-NMR (400 MHz, Chloroform-*d*)**  $\delta$  8.87 (d,  $J$  = 3.8 Hz, 1H), 8.17 (d,  $J$  = 8.2 Hz, 1H), 7.85 (d,  $J$  = 7.5 Hz, 1H), 7.82 (d,  $J$  = 8.1 Hz, 1H), 7.74 (d,  $J$  = 7.4 Hz, 1H), 7.62 (t,  $J$  = 7.9 Hz, 1H), 7.57 (d,  $J$  = 8.3 Hz, 2H), 7.40 (dd,  $J$  = 8.2, 4.0 Hz, 1H), 4.99 (d,  $J$  = 16.1 Hz, 1H), 4.68 (d,  $J$  = 16.1 Hz, 1H), 4.16 (q,  $J$  = 6.7 Hz, 2H), 1.32 (s, 3H), 1.24 (t,  $J$  = 7.3 Hz, 3H). **<sup>13</sup>C NMR (101 MHz, CDCl<sub>3</sub>)**  $\delta$  168.3, 149.9, 149.6, 147.0, 143.1, 139.2, 137.8, 135.9, 131.3, 130.42, 130.35, 128.9, 127.5, 125.8, 125.6, 121.3, 116.1, 60.2, 35.3, 30.0, 15.2, 13.7. HRMS (ESI): calculated for C<sub>24</sub>H<sub>19</sub>F<sub>3</sub>N<sub>2</sub>O<sub>3</sub> for [M+H]<sup>+</sup> 441.1432, found: 441.1429.

**6-Methyl-4-methylene-3-phenyl-2-(quinolin-8-yl)-3,4-dihydroisoquinolin-1(2H)-one (5a)**

Compound **5a** was prepared by the typical procedure in 0.1 mmol scale and the reaction mixture was purified by flash column chromatography (EtOAc: hexane =30:70). It is obtained as a yellow solid; 22.8 mg, 63% yield.

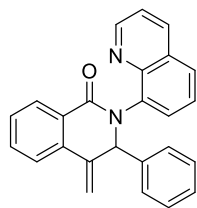

**<sup>1</sup>H-NMR (400 MHz, Chloroform-*d*)**  $\delta$  8.96 (d,  $J = 4.0$  Hz, 1H), 8.32 (d,  $J = 8.0$  Hz, 1H), 8.19 (d,  $J = 8.0$  Hz, 1H), 7.78 (d,  $J = 8.0$  Hz, 1H), 7.57-7.41 (m, 6H), 7.24-7.18 (m, 5H), 5.86 (s, 1H), 5.72(s, 1H), 5.44(s, 1H). **<sup>13</sup>C NMR (101 MHz, Chloroform-*d*)**  $\delta$  163.9, 150.8, 144.3, 141.5, 141.2, 136.5, 135.4, 132.6, 130.5, 129.8, 129.0, 128.9, 128.7, 128.2, 128.1, 127.9, 126.7, 126.2, 124.3, 121.6, 113.8, 77.5, 77.4, 77.2, 76.8, 69.8. HRMS (ESI): calculated for C<sub>25</sub>H<sub>18</sub>N<sub>2</sub>O for [M+H]<sup>+</sup> 363.1618, found: 363.1617.

#### 6-Methoxy-4-methylene-3-phenyl-2-(quinolin-8-yl)-3,4-dihydroisoquinolin-1(2H)-one (5b)

Compound **5b** was prepared by the typical procedure in 0.1 mmol scale and the reaction mixture was purified by flash column chromatography (hexane : EtOAc=70:30). It is obtained as a yellow solid; 23.9 mg, 61% yield.

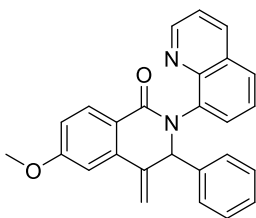

**<sup>1</sup>H NMR (400 MHz, Chloroform-*d*)**  $\delta$  8.98 (d,  $J = 4.0$  Hz, 1H), 8.26 (dd,  $J = 4.0, 8.0$  Hz, 1H), 8.20 (d,  $J = 8.0$  Hz, 1H), 7.77 (d,  $J = 8.0$  Hz, 1H), 7.44-7.41 (m, 3H), 7.26-7.19 (m, 5H), 7.01-6.99 (m, 2H), 5.82 (s, 1H), 5.70 (s, 1H), 5.43 (s, 1H), 3.87 (s, 3H). **<sup>13</sup>C-NMR (101-MHz, Chloroform-*d*)**  $\delta$  163.7, 162.9, 150.5, 144.0, 141.5, 141.1, 138.4, 137.0, 136.5, 130.9, 130.4, 129.6, 128.5, 127.9, 127.8, 127.7, 126.5, 126.0, 121.3, 121.2, 114.9, 113.7, 108.5, 69.7, 55.4. HRMS (ESI): calculated for C<sub>26</sub>H<sub>20</sub>N<sub>2</sub>O<sub>2</sub> for [M+Na]<sup>+</sup> 415.1415, found: 415.1417.

#### 4-methylene-1-oxo-3-phenyl-2-(quinolin-8-yl)-1,2,3,4-tetrahydroisoquinoline-6-carbonitrile (5c)

Compound **5c** was prepared by the typical procedure in 0.1 mmol scale and the reaction mixture was purified by flash column chromatography (hexane : EtOAc=70:30). It is obtained as a yellow solid; 20.8 mg, 55% yield.

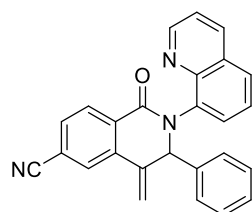

**<sup>1</sup>H NMR (400 MHz, Chloroform-*d*)**  $\delta$  9.01 (d,  $J = 4.0$  Hz, 1H), 8.40 (dd,  $J = 4.0, 8.0$  Hz, 1H), 8.27 (d,  $J = 8.0$  Hz, 1H), 7.84-7.81 (m, 2H), 7.74 (dd,  $J = 4.0, 8.0$  Hz, 1H), 7.52-7.46 (m, 3H), 7.22-7.20 (m, 5H), 5.90 (s, 1H), 5.80 (s, 1H), 5.56 (s, 1H). **<sup>13</sup>C-NMR (101-MHz, Chloroform-*d*)**  $\delta$  162.5, 150.4, 139.6, 136.4, 132.0, 131.5, 130.5, 129.8, 129.8, 129.0, 128.5, 128.48, 128.3, 126.6, 121.8, 118.2, 116.3, 69.6. HRMS (ESI): calculated for C<sub>26</sub>H<sub>17</sub>N<sub>3</sub>O for [M+H]<sup>+</sup> 388.1443, found: 388.1446.

#### 6-cyclohexyl-4-methylene-3-phenyl-2-(quinolin-8-yl)-3,4-dihydroisoquinolin-1(2H)-one (5d)

Compound **5d** was prepared by the typical procedure in 0.1 mmol scale and the reaction mixture was purified by flash column chromatography (hexane : EtOAc=70:30). It is obtained as a yellow solid; 25.3 mg, 57% yield.

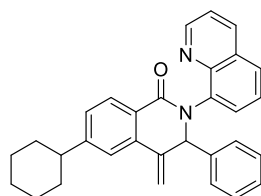

**<sup>1</sup>H NMR (400 MHz, Chloroform-*d*)**  $\delta$  8.95 (d, *J* = 4.0 Hz, 1H), 8.23 (d, *J* = 8.0 Hz, 1H), 8.17 (dd, *J* = 4.0, 8.0 Hz, 1H), 7.76 (d, *J* = 4.0 Hz, 1H), 7.44-7.38 (m, 4H), 7.33 (dd, *J* = 4.0, 8.0 Hz, 1H), 7.25-7.18 (m, 5H), 5.83 (s, 1H), 5.72 (s, 1H), 5.40 (s, 1H), 2.60 (m, 1H), 1.91-1.75 (m, 5H), 1.47-1.39 (m, 3H), 1.26, 0.87(m, 2H). **<sup>13</sup>C-NMR (101-MHz, CDCl<sub>3</sub>)**  $\delta$  153.0, 150.9, 141.9, 136.5, 135.3, 129.8, 129.1, 128.8, 128.1, 127.9, 127.9, 126.9, 126.3, 126.0, 122.6, 121.6, 113.4, 77.6, 77.5, 77.3, 76.9, 70.0, 45.1, 34.4, 34.4, 30.0, 27.0, 26.3. HRMS (ESI): calculated for C<sub>31</sub>H<sub>28</sub>N<sub>2</sub>O for [M+H]<sup>+</sup> 445.2275, found: 445.2276.

#### 4-methylene-5-phenyl-6-(quinolin-8-yl)-5,6-dihydrothieno[2,3-*c*]pyridin-7(4H)-one (5e)

Compound **5e** was prepared by the typical procedure in 0.1 mmol scale and the reaction mixture was purified by flash column chromatography (hexane : EtOAc=70:30). It is obtained as a yellow solid; 16.5 mg, 45% yield.

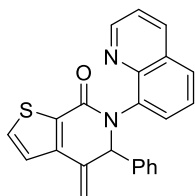

**<sup>1</sup>H NMR (400 MHz, Chloroform-*d*)**  $\delta$  9.01(d, *J* = 4.0 Hz, 1H), 8.23 (d, *J* = 8.0 Hz, 1H), 7.76(dd, *J* = 4.0, 8.0 Hz, 1H), 7.56 (d, *J* = 8.0 Hz, 1H), 7.48-7.45 (m, 1H), 7.40-7.38 (m, 1H), 7.25, 7.24-7.19 (m, 6H), 6.02 (s, 1H), 5.61 (s, 1H), 5.24 (s, 1H). **<sup>13</sup>C-NMR (101-MHz, Chloroform-*d*)**  $\delta$  160.4, 150.7, 144.4, 141.9, 138.8, 136.5, 132.9, 132.4, 132.3, 131.4, 129.7, 129.5, 129.2, 129.0, 128.9, 128.7, 128.4, 128.3, 128.1, 123.0, 127.2, 127.0, 126.6, 126.6, 126.1, 124.1, 121.5, 113.1, 77.5, 77.2, 76.8, 70.8, 29.8. HRMS (ESI): calculated for C<sub>23</sub>H<sub>16</sub>N<sub>2</sub>O<sub>2</sub>S for [M+H]<sup>+</sup> 369.1093, found: 369.1089.

#### 4-methylene-3-phenyl-2-(quinolin-8-yl)-3,4-dihydrobenzo[*g*]isoquinolin-1(2H)-one (5f)

Compound **5f** was prepared by the typical procedure in 0.1 mmol scale and the reaction mixture was purified by flash column chromatography (hexane : EtOAc=70:30). It is obtained as a yellow solid; 19.3 mg, 45% yield.

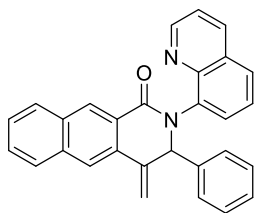

**<sup>1</sup>H NMR (400 MHz, Chloroform-*d*)**  $\delta$  8.98 (d, *J* = 4.0 Hz, 1H), 8.87 (s, 1H), 8.21 (dd, *J* = 4.0, 8.0 Hz, 1H), 8.01-8.00 (m, 2H), 7.84 (d, *J* = 8.0 Hz, 1H), 7.80 (d, *J* = 8.0 Hz, 1H), 7.58-7.50 (m, 3H), 7.46-7.42 (m, 2H), 7.24-7.22 (m, 2H), 7.17, 7.16-7.15 (m, 3H), 5.89 (s, 1H), 5.83 (s, 1H), 5.51 (s, 1H). **<sup>13</sup>C-NMR (101-MHz, Chloroform-*d*)**  $\delta$  164.2, 150.8, 144.3, 141.8, 141.1, 136.5, 135.4, 133.3, 132.3, 130.3, 130.1, 129.8, 129.7, 128.7, 128.21, 128.16, 128.02, 127.8, 126.8, 126.6, 126.58, 126.3, 126.2, 123.7, 121.6, 113.5, 70.3. HRMS (ESI): calculated for C<sub>29</sub>H<sub>20</sub>N<sub>2</sub>O for [M+H]<sup>+</sup> 413.1652, found:413.1654.

### 3-(4-fluorophenyl)-4-methylene-2-(quinolin-8-yl)-3,4-dihydroisoquinolin-1(2H)-one (5g)

Compound **5g** was prepared by the typical procedure in 0.1 mmol scale and the reaction mixture was purified by flash column chromatography (petroleum ether : EtOAc =70:30). It is obtained as a yellow solid; 21.4 mg, 56% yield.

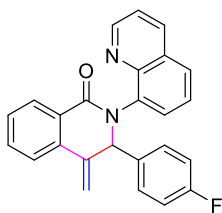

**<sup>1</sup>H NMR (400 MHz, CDCl<sub>3</sub>)**  $\delta$  8.95 (s, 1H), 8.30 (d, *J*=4.0 Hz, 1H), 8.19 (d, *J*=8.0 Hz, 1H), 7.77 (t, *J*=4.0 Hz, 1H), 7.56 (m, 2H), 7.49 (t, *J*=8.0 Hz, 1H), 7.43 (m, 3H), 7.19 (t, *J*=8.0 Hz, 2H), 6.86 (t, *J*=8.0 Hz, 2H), 5.87 (s, 1H), 5.73 (s, 1H), 5.39 (s, 1H). **<sup>13</sup>C NMR (101 MHz, CDCl<sub>3</sub>)**  $\delta$  163.5, 150.4, 141.0, 136.7, 136.3, 134.9, 132.4, 130.2, 129.4, 128.8, 128.6, 128.1, 128.0, 127.9, 127.7, 125.9, 124.0, 121.3, 115.3, 115.1, 113.7, 68.8. HRMS (ESI) calcd. for C<sub>25</sub>H<sub>18</sub>FN<sub>2</sub>O 381.1398; found 381.1391.

### 6-fluoro-3-(4-fluorophenyl)-4-methylene-2-(quinolin-8-yl)-3,4-dihydroisoquinolin-1(2H)-one (5h)

Compound **5h** was prepared by the typical procedure in 0.1 mmol scale and the reaction mixture was purified by flash column chromatography (petroleum ether : EtOAc =70:30). It is obtained as a yellow solid; 21.0 mg, 52% yield.

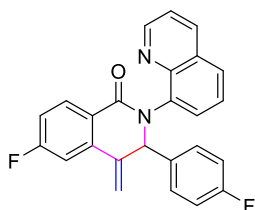

**<sup>1</sup>H NMR (400 MHz, CDCl<sub>3</sub>)**  $\delta$  8.95 (s, 1H), 8.19 (d, *J*= 4.0 Hz, 1H), 7.79 (d, *J*=4.0 Hz, 1H), 7.55 (d, *J*=4.0 Hz, 1H), 7.47-7.42 (m, 3H), 7.32 (d, *J*=8.0 Hz, 1H), 7.17 (t, *J*=8.0 Hz, 2H), 6.89(t, *J*=8.0 Hz, 2H), 5.82 (s, 1H), 5.74 (s, 1H), 5.50 (s, 1H). **<sup>13</sup>C NMR (101 MHz, CDCl<sub>3</sub>)**  $\delta$  163.8, 163.6, 161.2, 161.1, 150.7, 144.1, 141.2, 138.2, 136.6, 136.1, 133.9, 133.8, 130.4, 129.8, 128.3, 128.3, 128.2, 126.2, 121.6, 120.6,

120.5, 117.8, 117.5, 116.5, 116.4, 115.7, 115.4, 115.1, 68.9. HRMS (ESI) calcd. for C<sub>25</sub>H<sub>17</sub>F<sub>2</sub>N<sub>2</sub>O 399.1416; found 399.1413.

### 3-(4-chlorophenyl)-4-methylene-2-(quinolin-8-yl)-3,4-dihydroisoquinolin-1(2H)-one (5i)

Compound **5i** was prepared by the typical procedure in 0.1 mmol scale and the reaction mixture was purified by flash column chromatography (petroleum ether : EtOAc =70:30). It is obtained as a yellow solid; 22.7 mg, 57% yield.

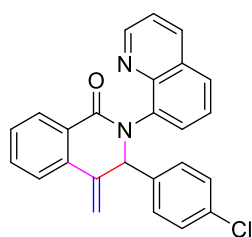

<sup>1</sup>H NMR (400 MHz, CDCl<sub>3</sub>) δ 8.96 (s, 1H), 8.30 (d, J=8.0 Hz, 1H), 8.18 (d, J=8.0 Hz, 1H), 7.77 (m, 1H), 7.76, 7.55-7.43 (m, 9H), 7.16 (m, 4H), 5.84 (s, 1H), 5.71 (s, 1H), 5.41 (s, 1H). <sup>13</sup>C NMR (101 MHz, CDCl<sub>3</sub>) δ 163.8, 150.8, 144.1, 141.1, 139.7, 136.6, 135.1, 133.7, 132.7, 130.4, 129.8, 129.3, 129.1, 128.9, 128.8, 128.7, 128.7, 128.5, 128.4, 128.3, 128.1, 128.0, 127.9, 126.2,

124.3, 121.7, 121.6, 114.0, 69.2. HRMS (ESI) calcd. for C<sub>25</sub>H<sub>18</sub>ClN<sub>2</sub>O 397.1242; found 397.1243.

### 3-(4-chlorophenyl)-6-methoxy-4-methylene-2-(quinolin-8-yl)-3,4-dihydroisoquinolin-1(2H)-one (5j)

Compound **5j** was prepared by the typical procedure in 0.1 mmol scale and the reaction mixture was purified by flash column chromatography (petroleum ether : EtOAc =50:50). It is obtained as a yellow solid; 21.7 mg, 51% yield.

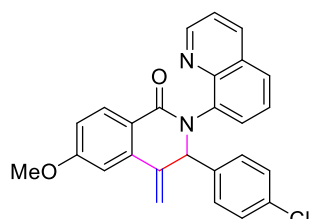

<sup>1</sup>H NMR (400 MHz, CDCl<sub>3</sub>) δ 8.95 (s, 1H), 8.25 (d, J=8.0 Hz, 1H), 8.17 (d, J=8.0 Hz, 1H), 7.77, 7.75, 7.45, 7.45, 7.43, 7.41, 7.40, 7.26, 7.19, 7.18, 7.17, 7.15, 7.01, 7.00, 5.85, 5.70, 5.42, 3.87. <sup>13</sup>C NMR (101 MHz, CDCl<sub>3</sub>) δ 163.8, 150.8, 144.1, 141.1, 139.7, 136.6, 135.1, 133.6, 132.8, 130.4,

129.8, 129.3, 129.1, 128.9, 128.8, 128.7, 128.7, 128.5, 128.4, 128.3, 128.1, 128.0, 127.9, 126.2, 124.3, 121.7, 121.6, 114.0, 69.2, 55.6. HRMS (ESI) calcd. for C<sub>26</sub>H<sub>20</sub>ClN<sub>2</sub>O<sub>2</sub> 427.1259; found 427.1261.

### 3-(4-methoxyphenyl)-4-methylene-2-(quinolin-8-yl)-3,4-dihydroisoquinolin-1(2H)-one (5k)

Compound **5k** was prepared by the typical procedure in 0.1 mmol scale and the reaction mixture was purified by flash column chromatography (petroleum ether : EtOAc =50:50). It is obtained as a

yellow solid; 23.5 mg, 60% yield.

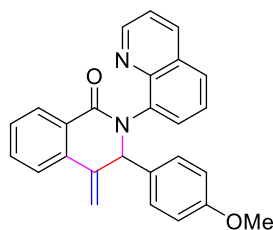

$^1\text{H NMR}$  (400 MHz,  $\text{CDCl}_3$ )  $\delta$  8.97(d,  $J = 4.0$  Hz, 1H), 8.30 (d,  $J = 8.0$  Hz, 1H), 8.19 (d,  $J = 8.0$  Hz, 1H), 7.77 (t,  $J = 4.0$  Hz, 1H), 7.56 (m, 1 H), 7.53 (t,  $J = 4.0$  Hz, 1H), 7.48 (m, 1H), 7.43 (m, 3H), 7.12 (d,  $J = 8.0$  Hz, 2H), 6.72 (d,  $J = 8.0$  Hz, 2H), 5.79 (s, 1H), 5.70 (s, 1H), 5.38 (s, 1H), 3.72 (s, 3H).  $^{13}\text{C NMR}$  (100 MHz,  $\text{CDCl}_3$ )  $\delta$  163.6, 159.0, 150.5, 144.0, 141.5, 136.3, 135.2,

133.1, 132.4, 130.3, 129.5, 128.7, 128.6, 127.8, 127.6, 125.9, 124.1, 121.3, 113.7, 113.3, 69.0, 55.0.

HRMS (ESI) calcd. for  $\text{C}_{26}\text{H}_{21}\text{N}_2\text{O}_2$  393.1718; found 393.1721.

#### **(E)-2-(quinolin-8-yl)-3-styryl-8-(trifluoromethyl)isoquinolin-1(2H)-one (6)**

The reaction was carried out in a 10 mL round-bottom flask and the compound 4m (0.1 mmol) was dissolved in 3 mL anhydrous DMF under argon atmosphere. 60% NaH (1.2 equiv.) was added slowly at 0 °C, then followed by the addition of aldehyde (0.12 mmol). The resulting mixture was allowed to warm to room temperature and stirred for overnight. The mixture was quenched with ice and extracted with  $\text{CH}_2\text{Cl}_2$  three times. The organic phase was combined and dried over  $\text{Na}_2\text{SO}_4$ . After removing the solvent in vacuo, the crude product was purified by flash column chromatography (petroleum ether : EtOAc =50:50) through silica gel.

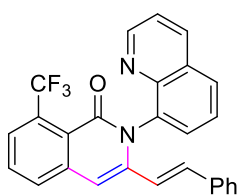

$^1\text{H NMR}$  (400 MHz,  $\text{CDCl}_3$ )  $\delta$  8.93 (s, 1H), 8.33 (d,  $J = 4.0$  Hz, 1H), 8.01 (d,  $J = 4.0$  Hz, 1H), 7.88 (d,  $J = 4.0$  Hz, 1H), 7.84 (d,  $J = 8.0$  Hz, 1H), 7.78 (d,  $J = 4.0$  Hz, 1H), 7.72 (m, 2H), 7.50 (m, 1H), 7.19 (m, 3H), 7.12 (d,  $J = 12.1$  Hz, 1H), 7.06-7.04 (m, 2H), 7.01 (s, 1H), 6.17 (d,  $J = 12.1$  Hz, 1H).  $^{13}\text{C NMR}$  (101

**MHz,  $\text{CDCl}_3$ )  $\delta$  160.4, 150.5, 140.3, 134.0 135.6, 133.9, 131.9, 131.7, 131.4, 130.2, 129.9, 129.7, 129.6, 128.83, 128.80, 127.5, 127.1, 126.5, 126.4, 122.6, 122.3, 121.7, 104.1, 29.8. LRMS (ESI) calcd. for  $\text{C}_{27}\text{H}_{18}\text{F}_3\text{N}_2\text{O}$  443.15; found 443.26.**

## Reference:

1. *Org. Lett.*, **2017**, 19, 13, 3524–3527
2. *Angew. Chem. Int. Ed.*, **2016**, 55, 5765-5769.
3. *J. Org. Chem.*, **2009**, 74, 763-1765.
4. *Org. Lett.*, **2017**, 19, 3524-3527.
5. *Chem. Comm.*, **2018**, 54, 12389-12392.
6. *J. Am. Chem. Soc.*, **2009**, 131, 6105-6107.
7. *J. Am. Chem. Soc.*, **2019**, 141, 1135-1140.
8. *J. Org. Chem.*, **1962**, 27, 1828-33.
9. *Angew. Chem. Int. Ed.*, **2016**, 55, 12361-12365.
10. *ACS Catal.*, **2018**, 8, 8115-8120.

## **$^1\text{H}$ -NMR Spectra and $^{13}\text{C}$ -NMR Spectra**



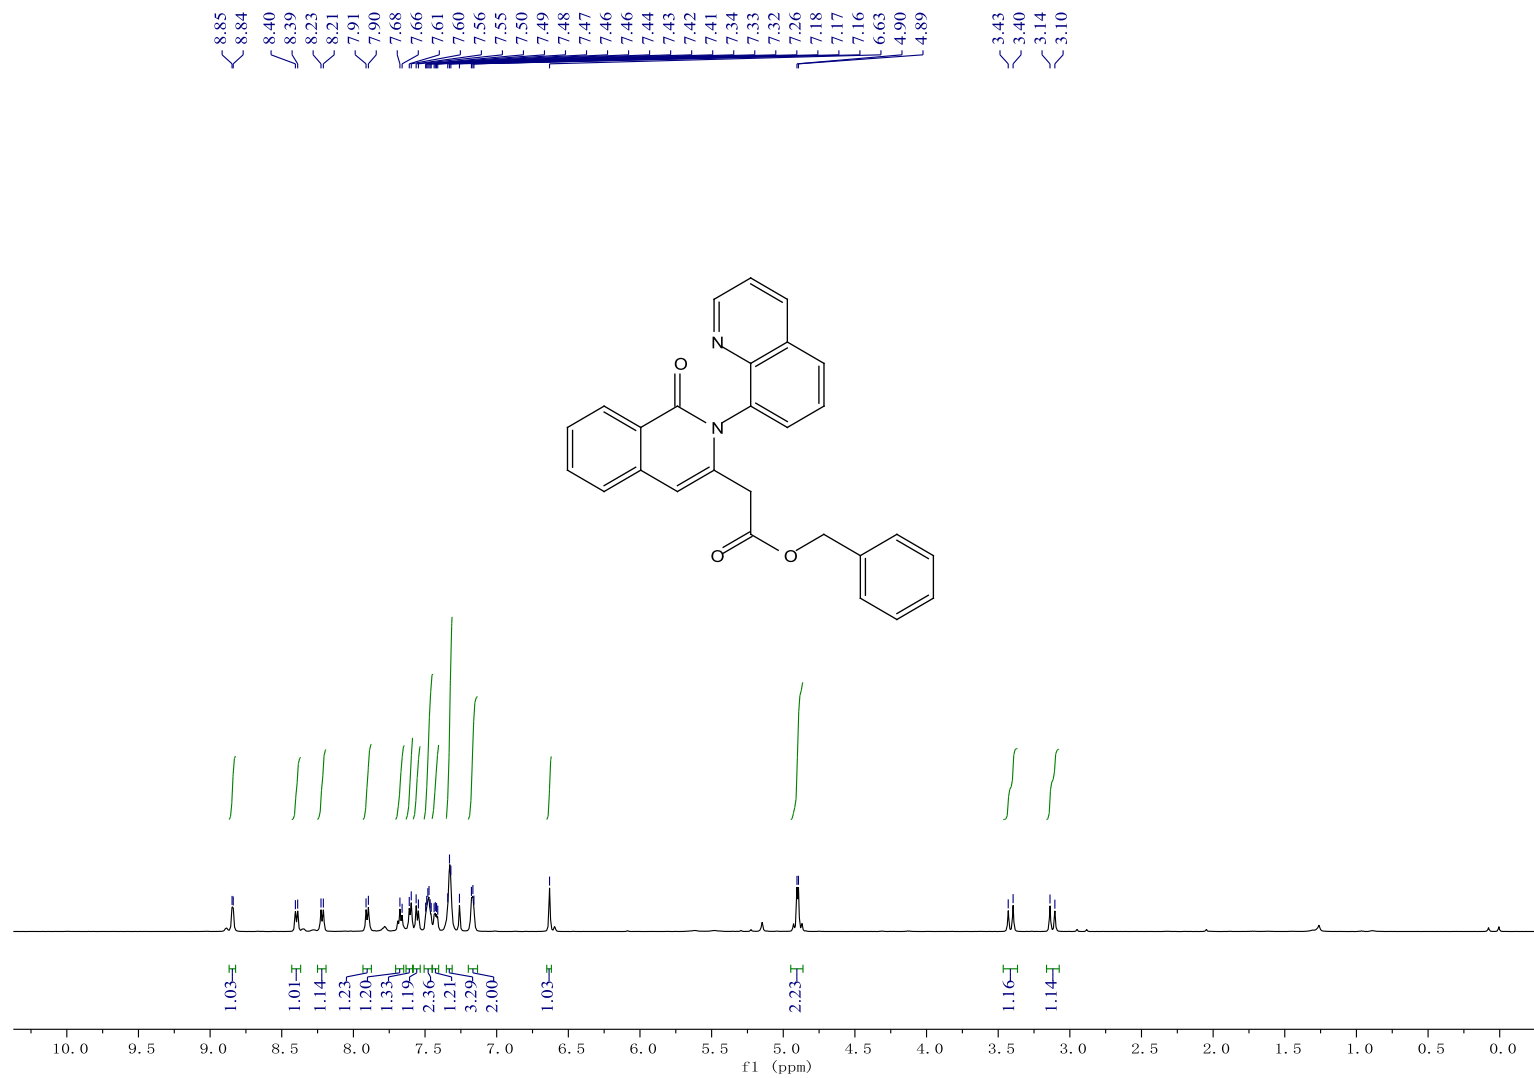

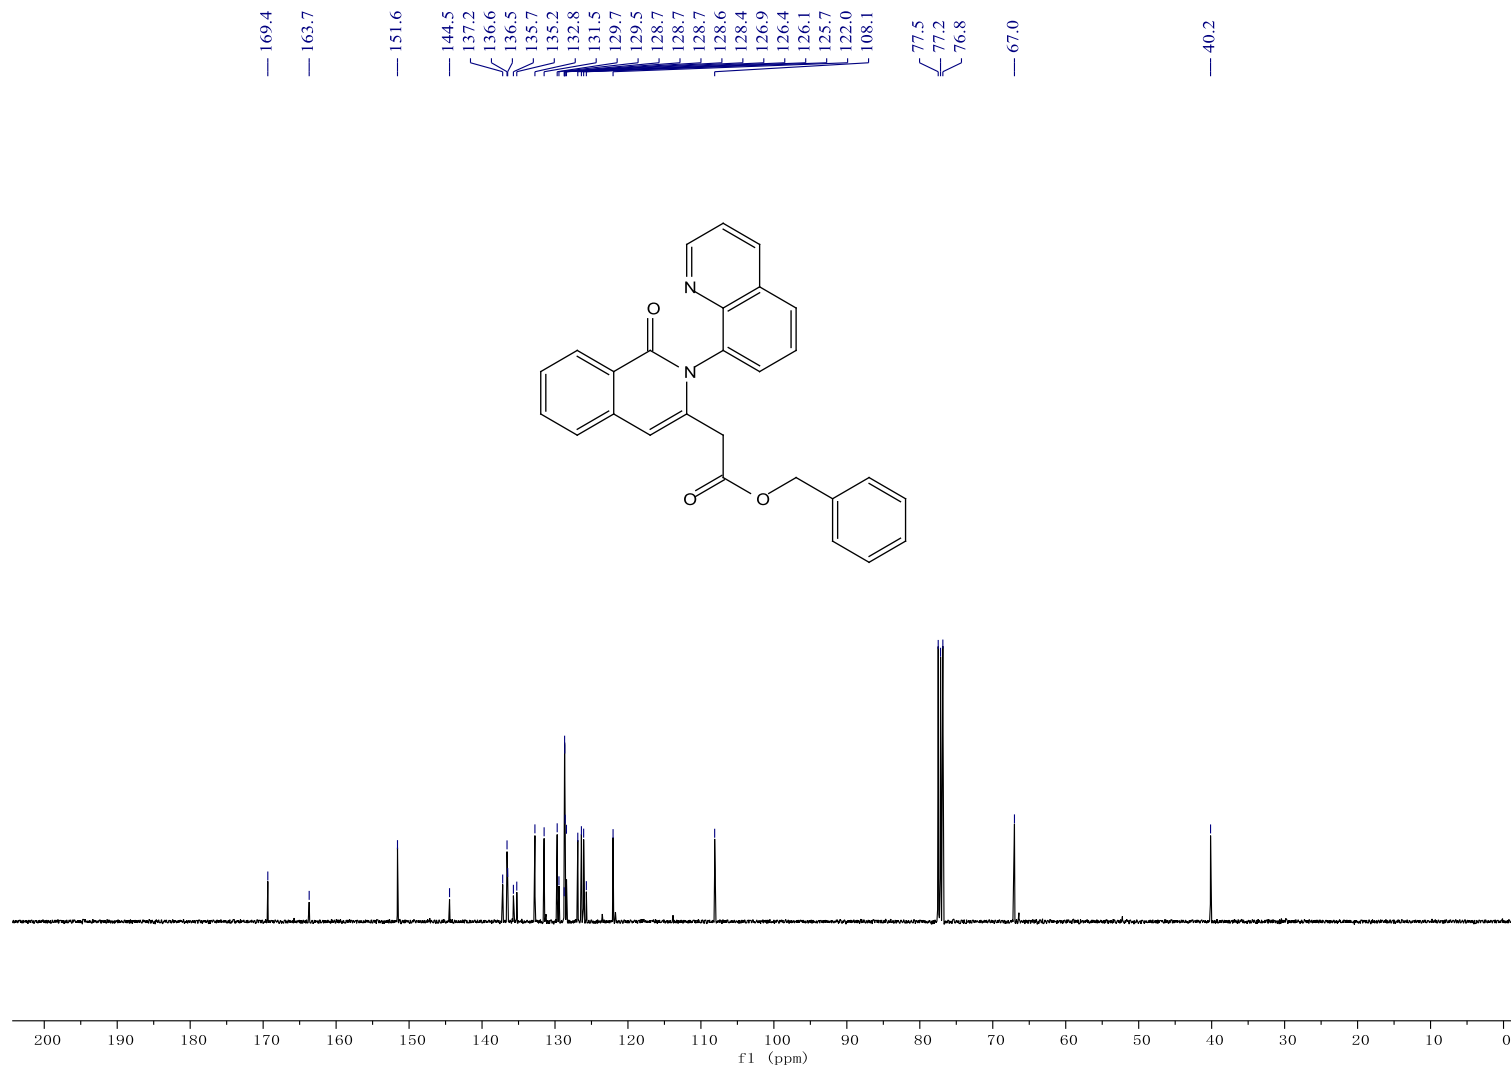

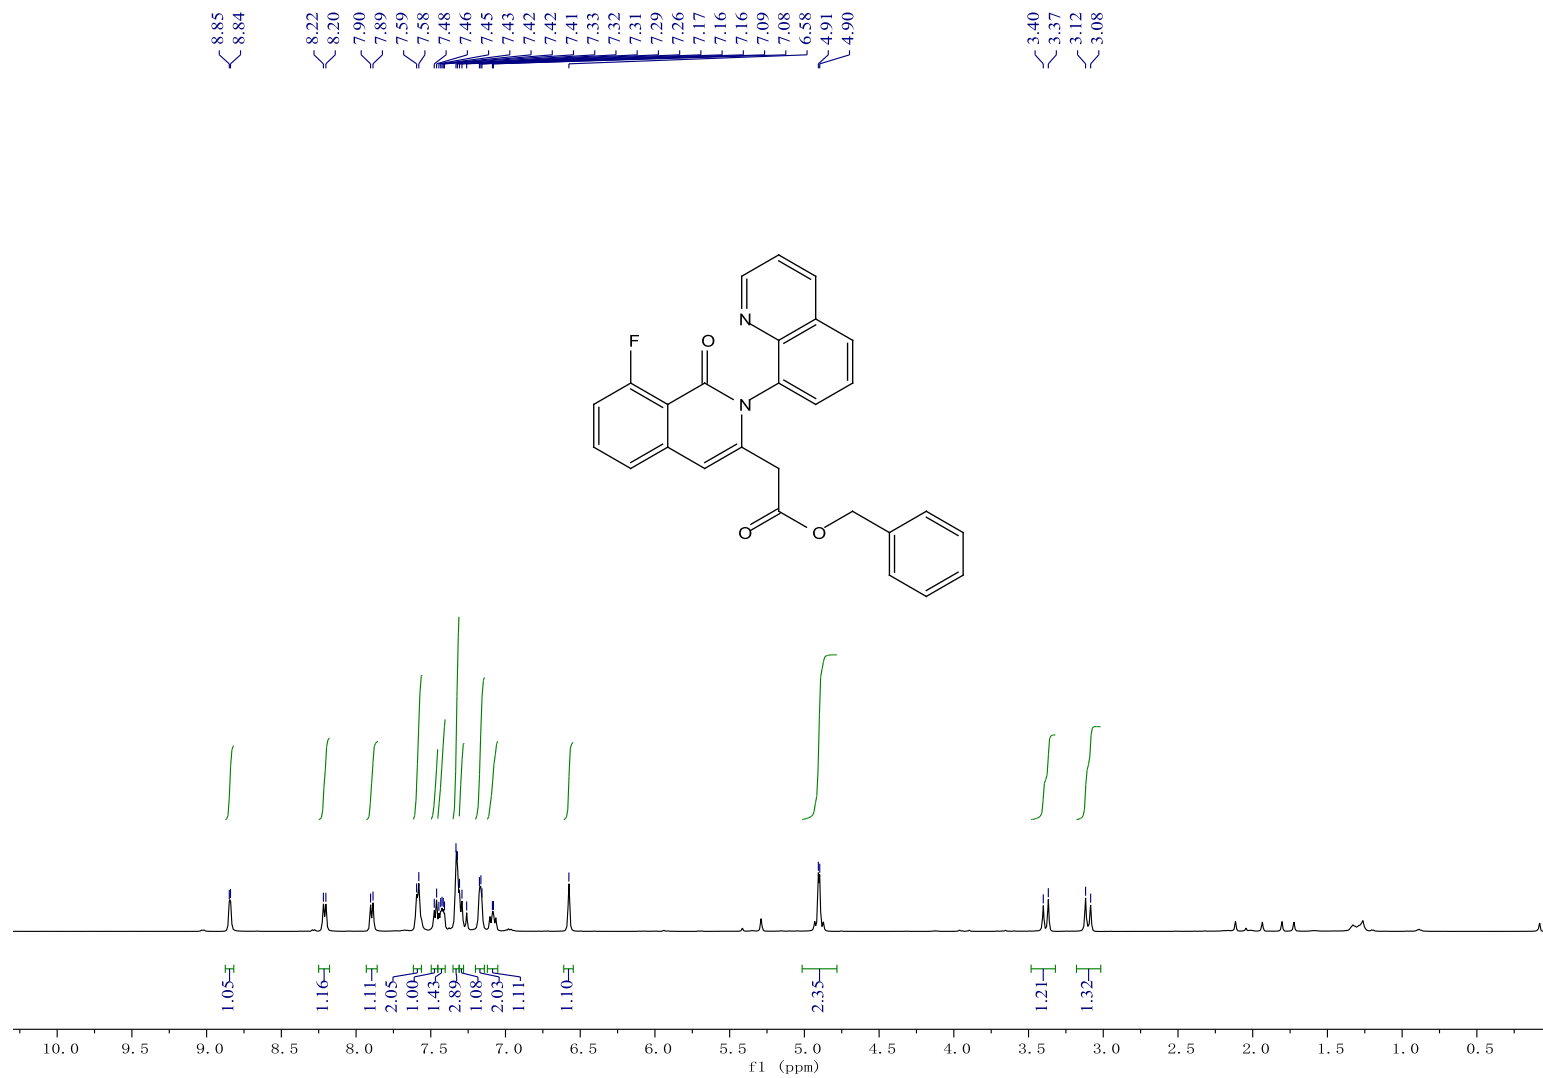

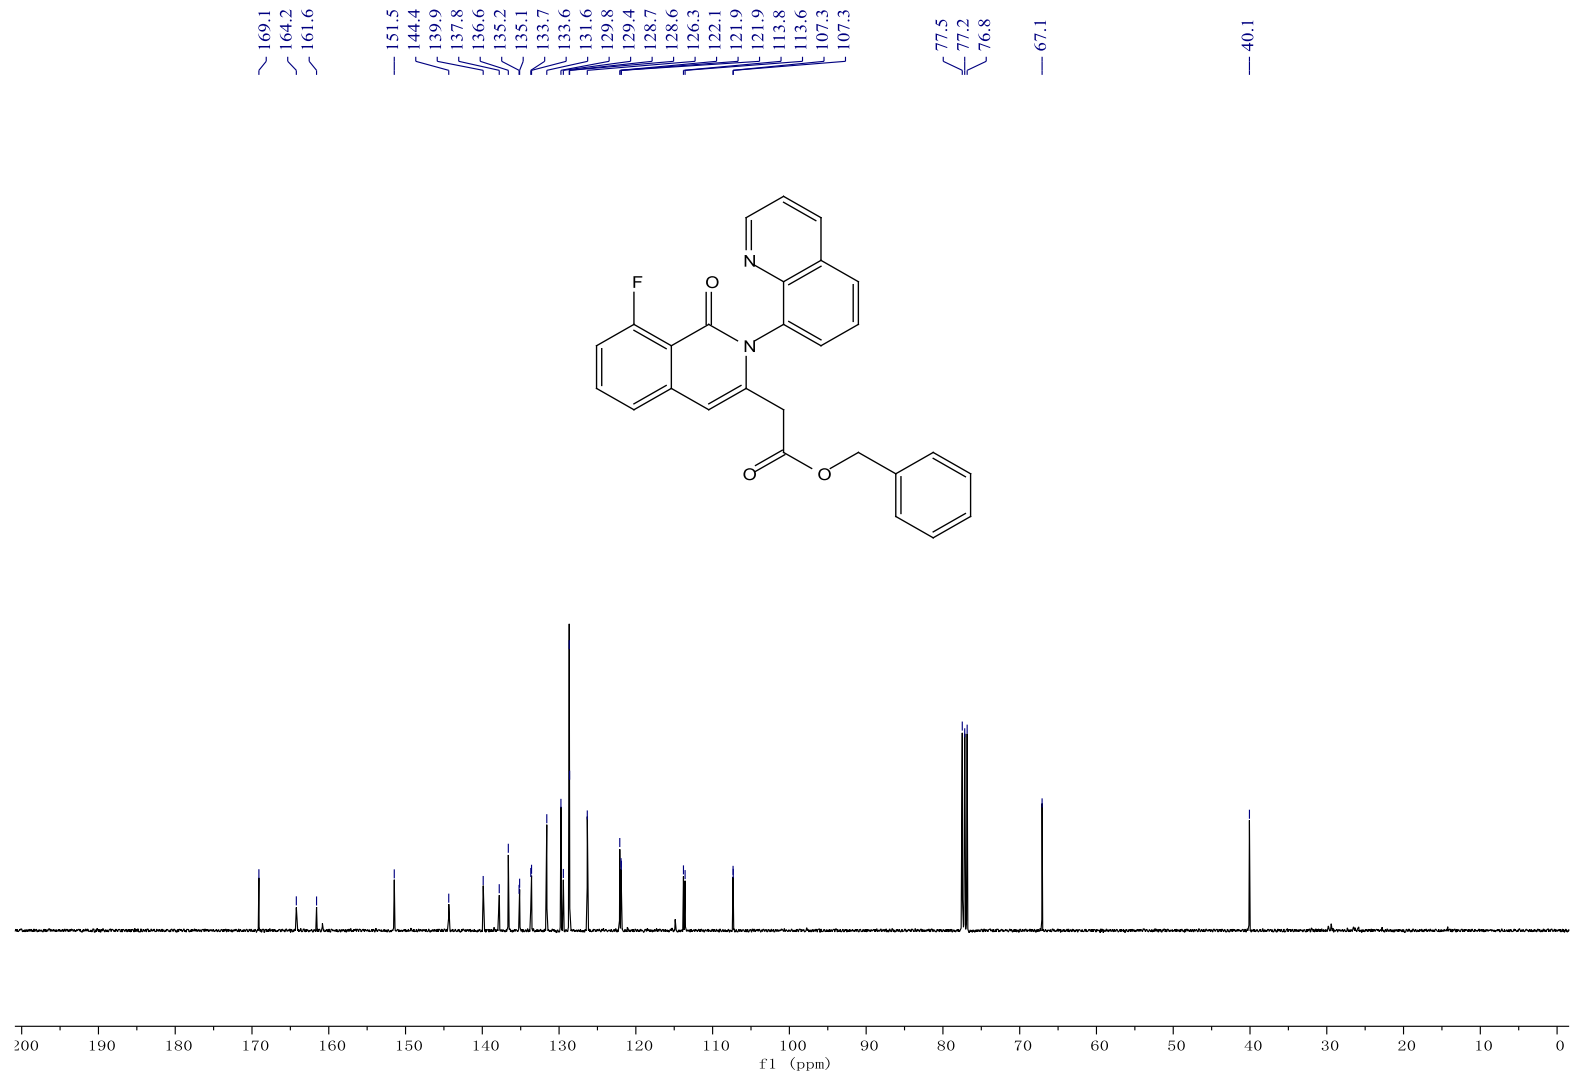

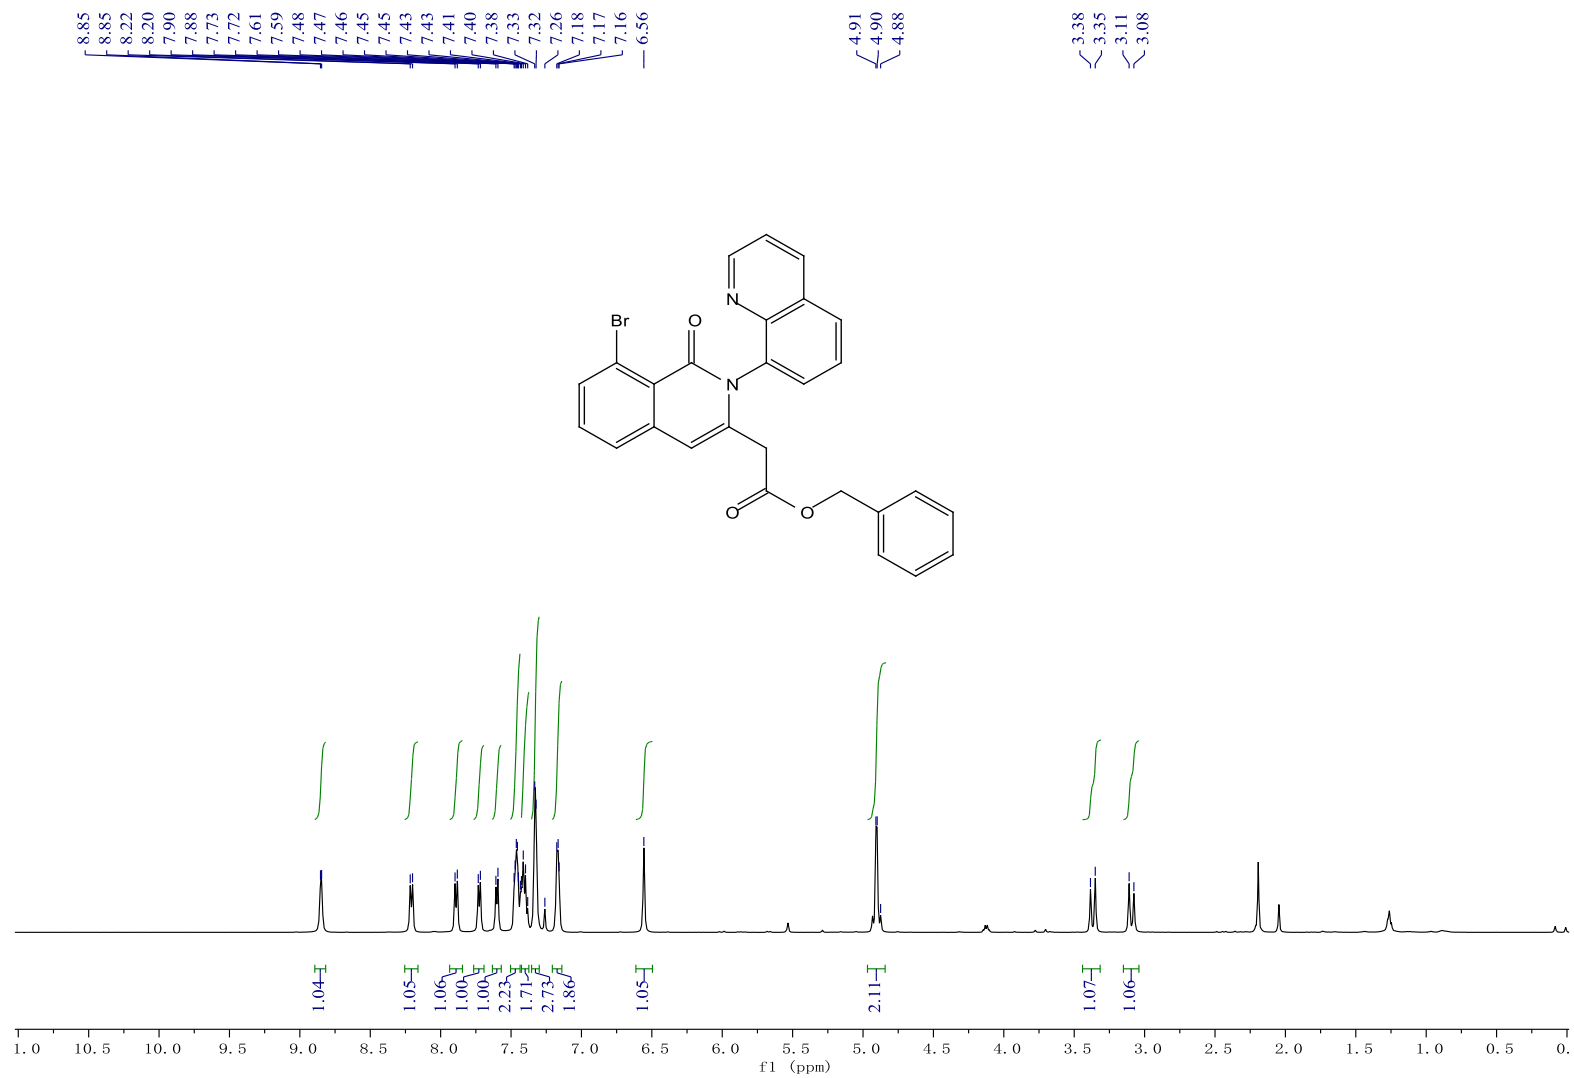

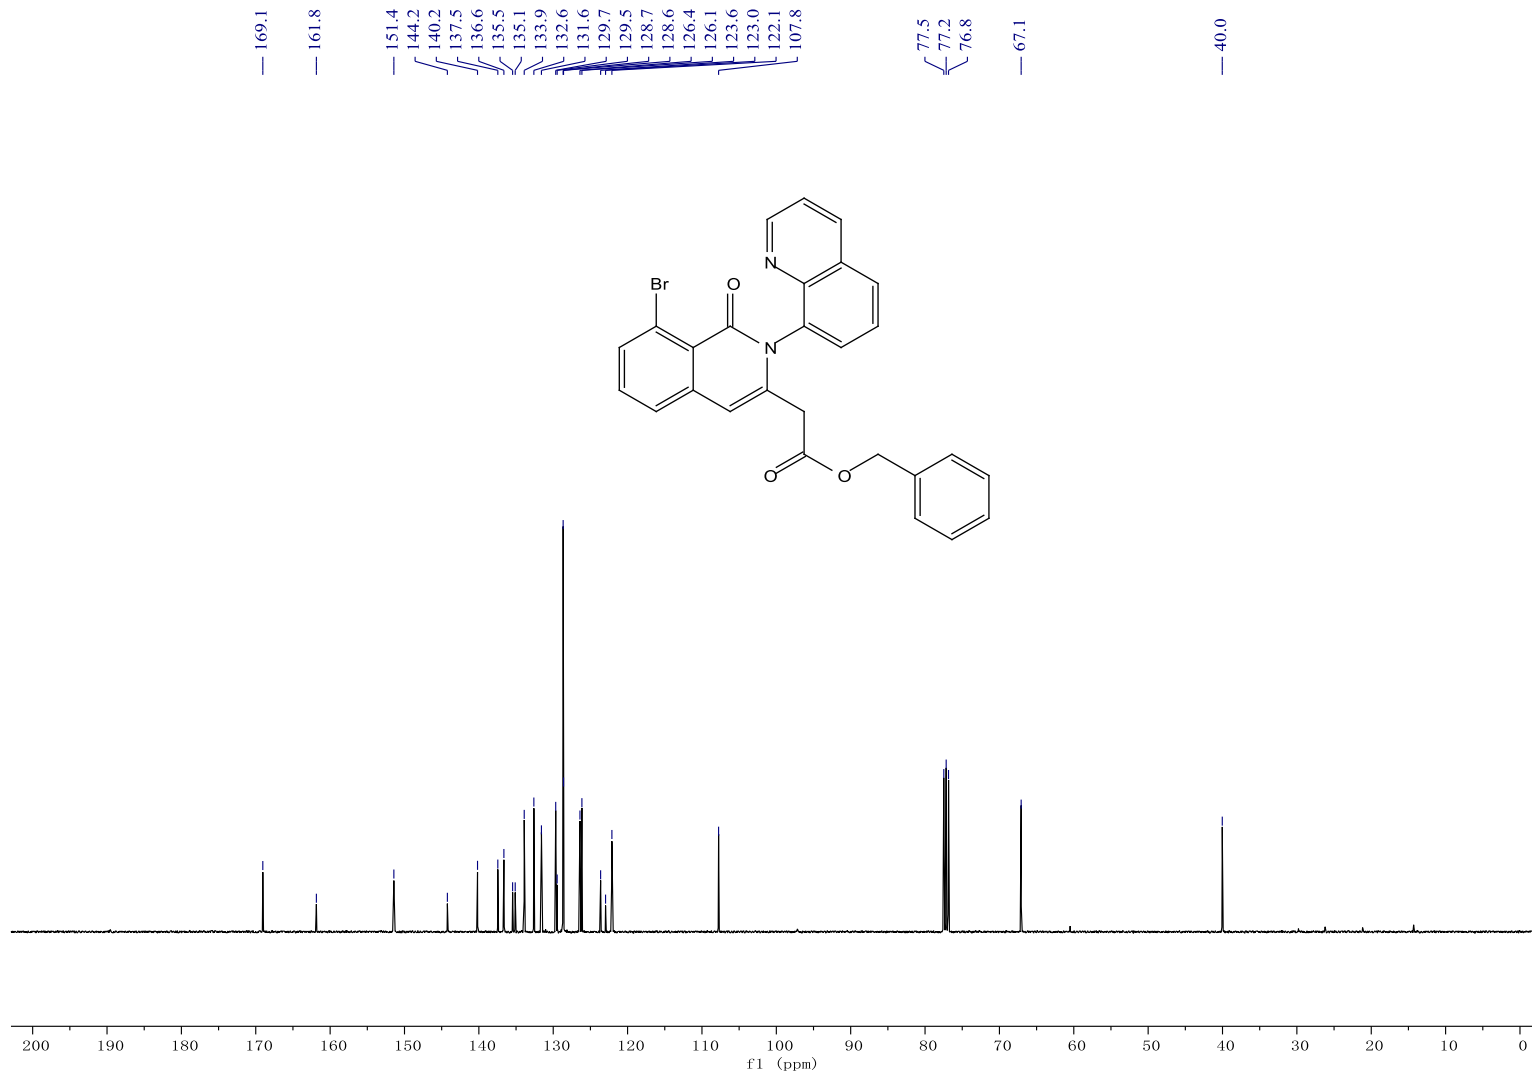

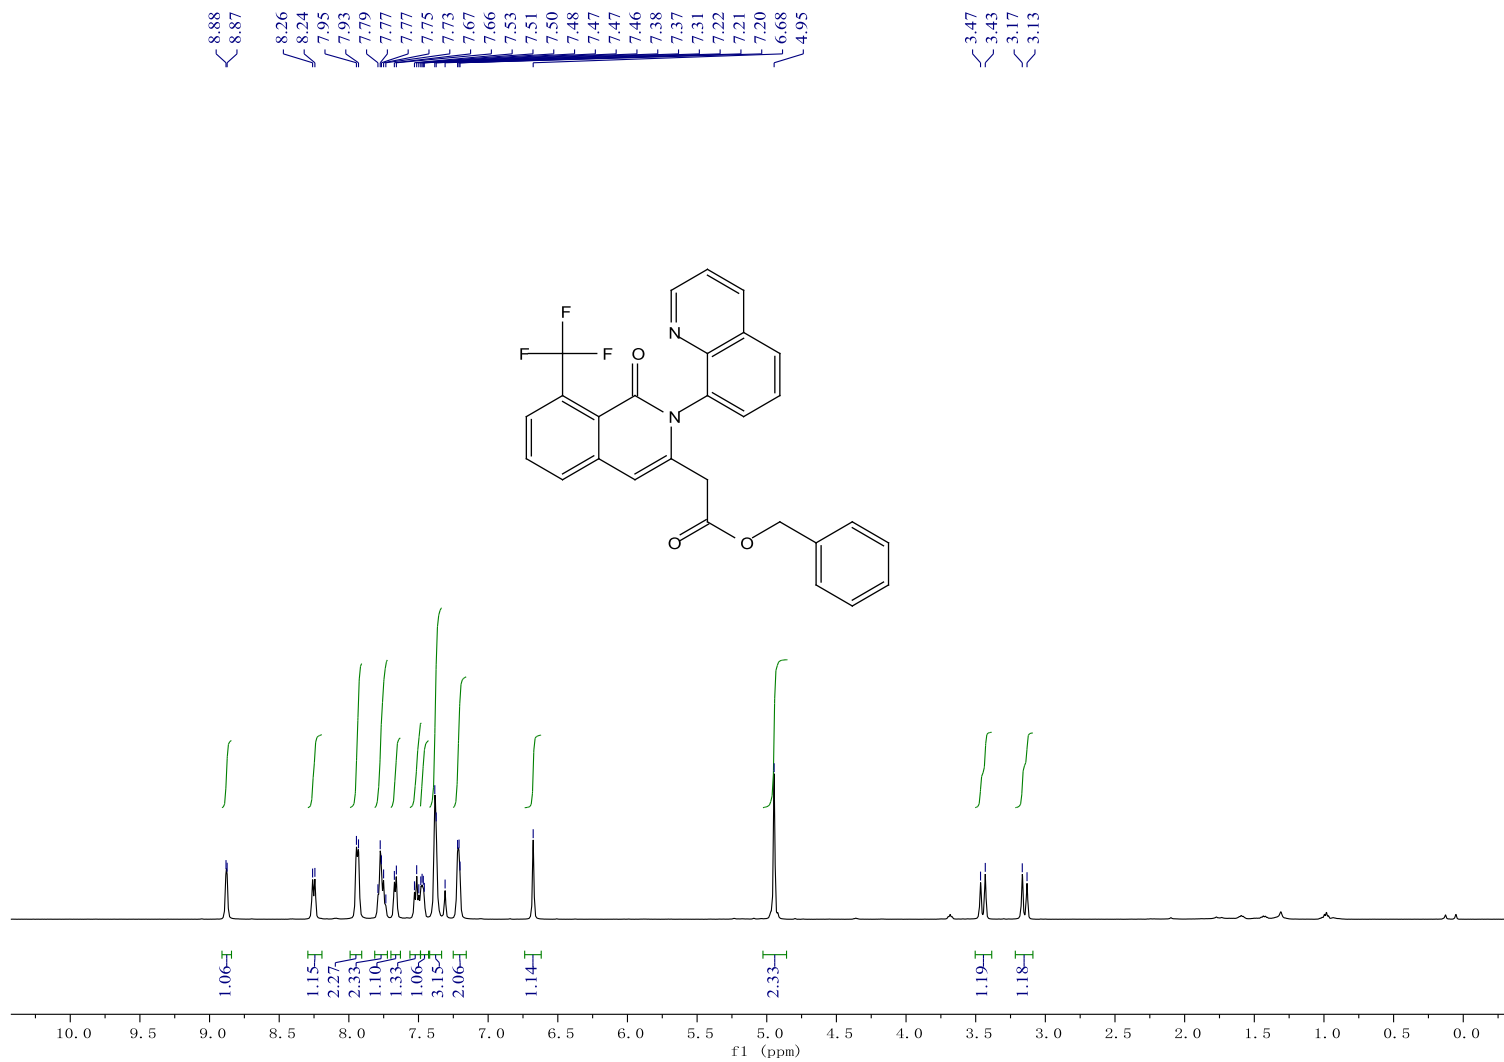

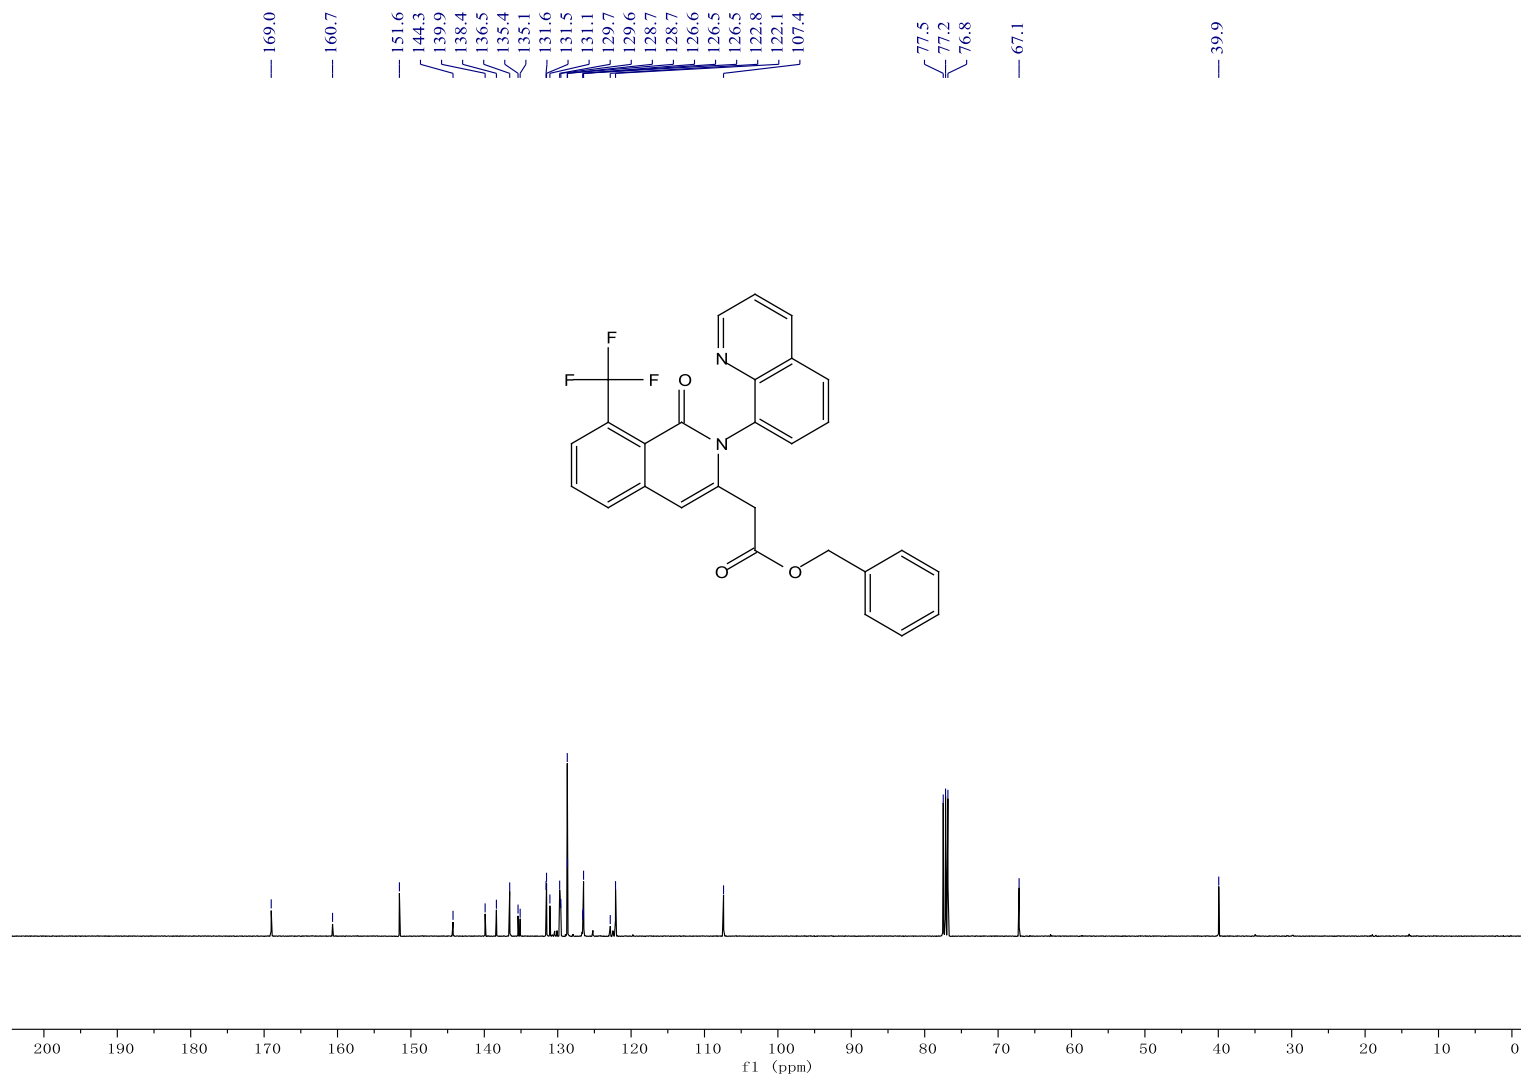



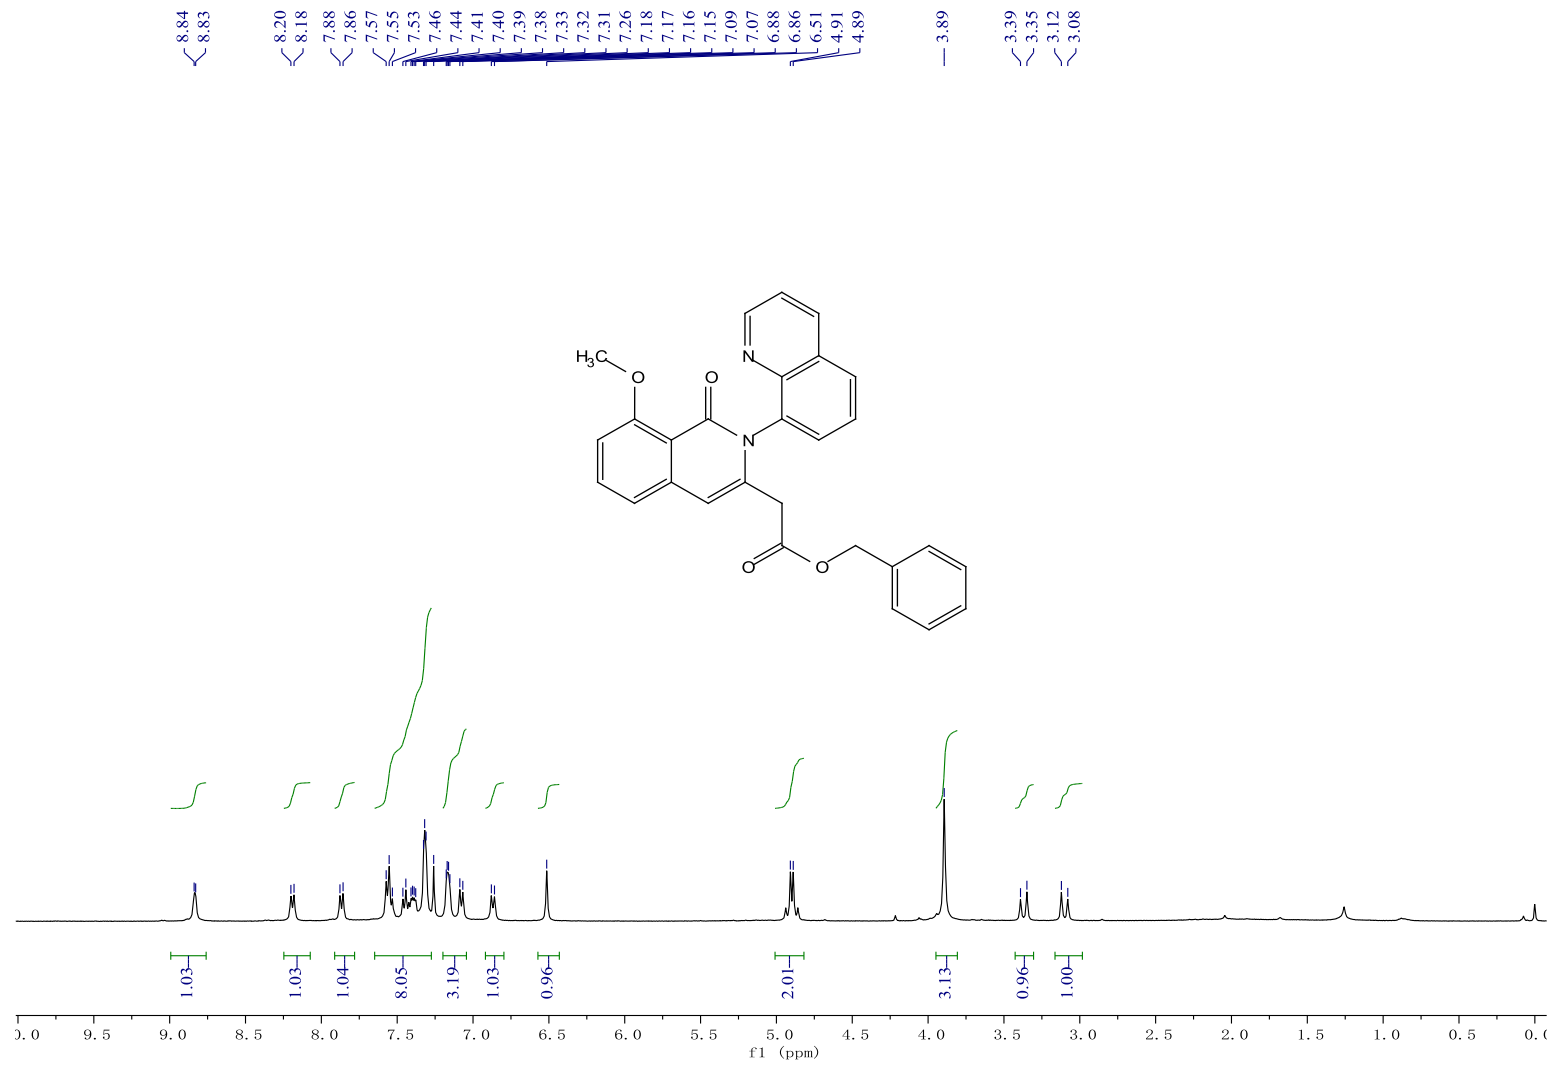

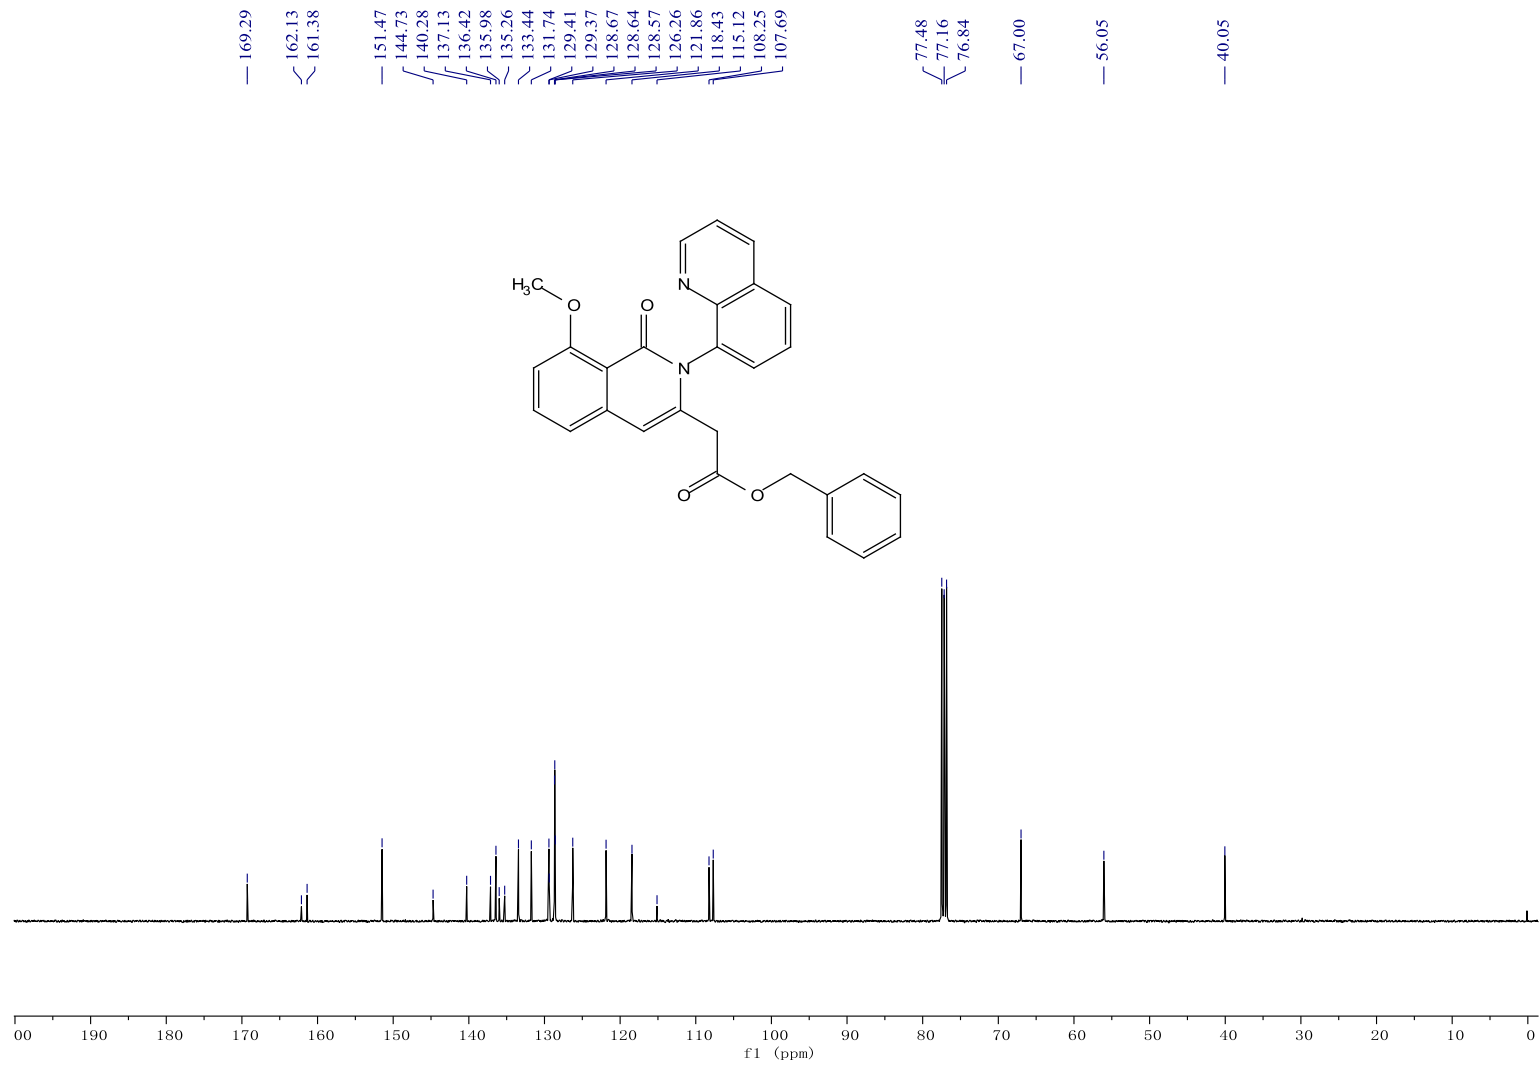

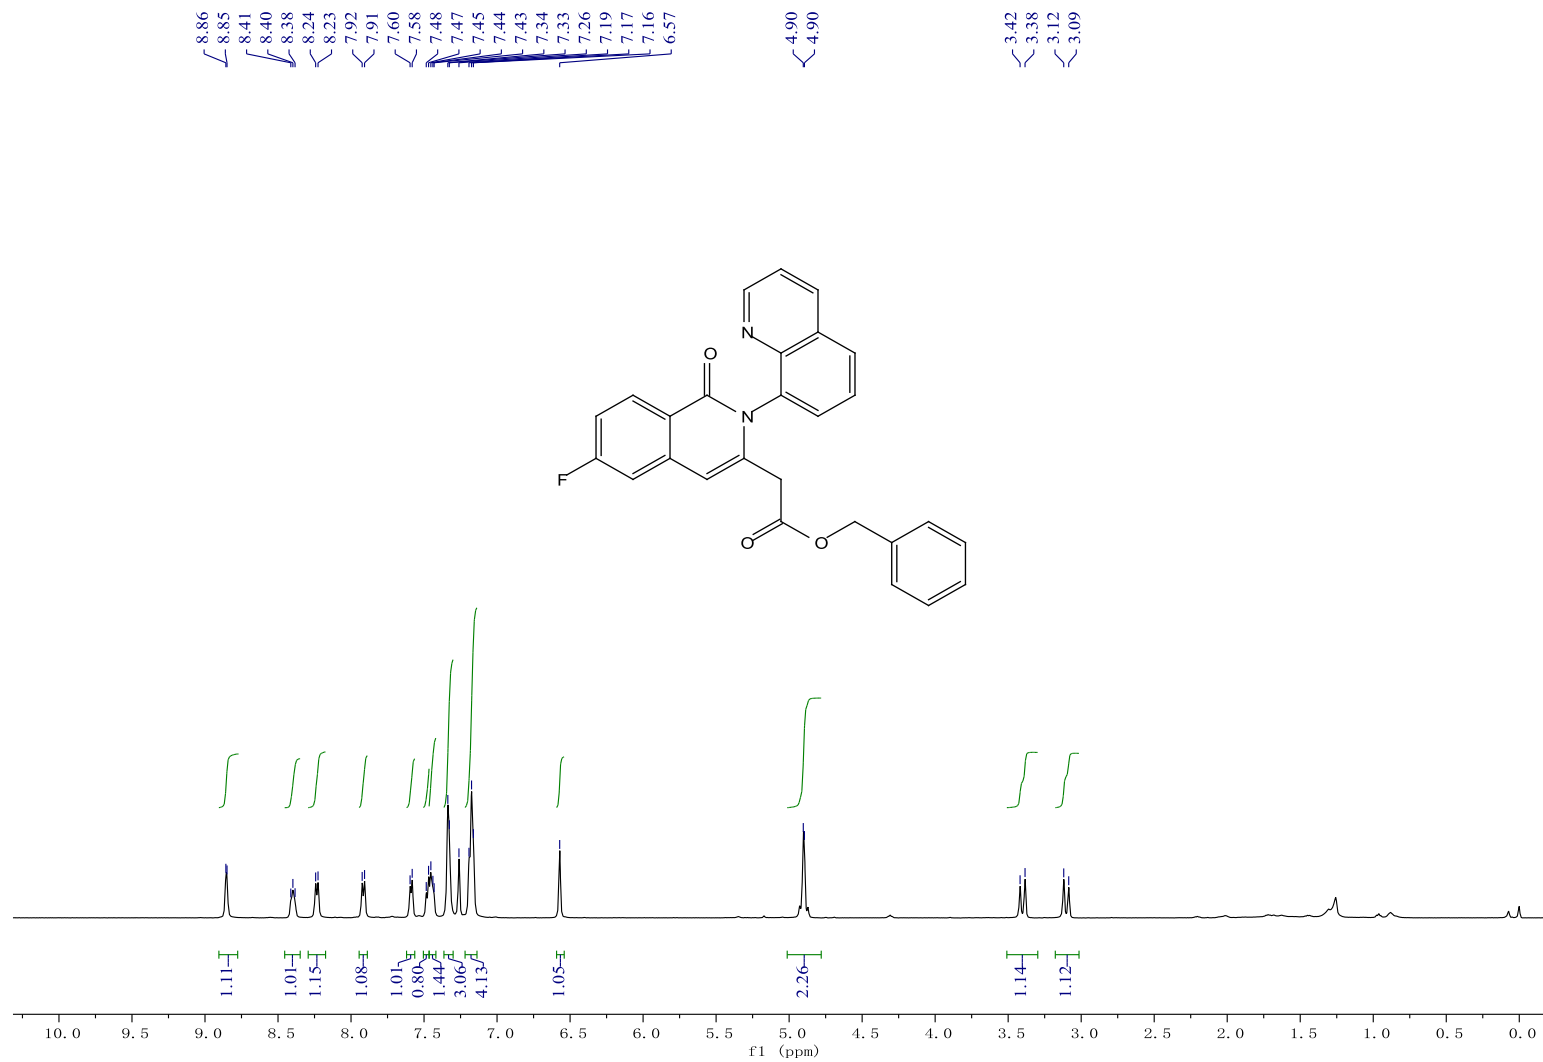

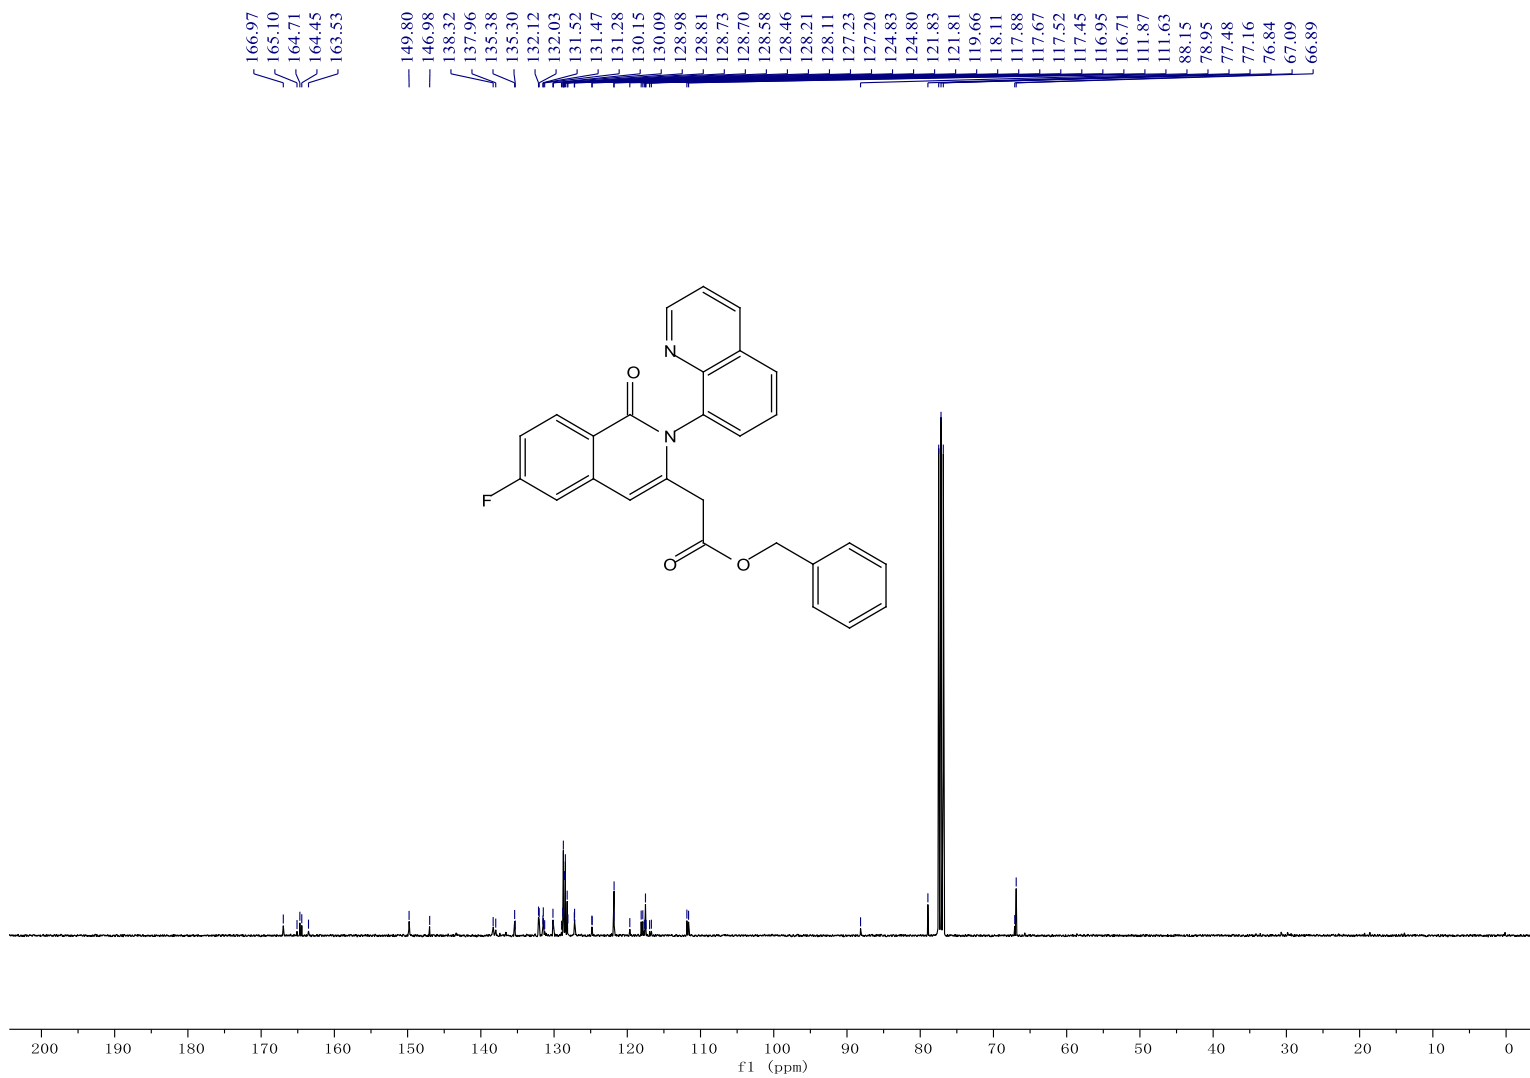

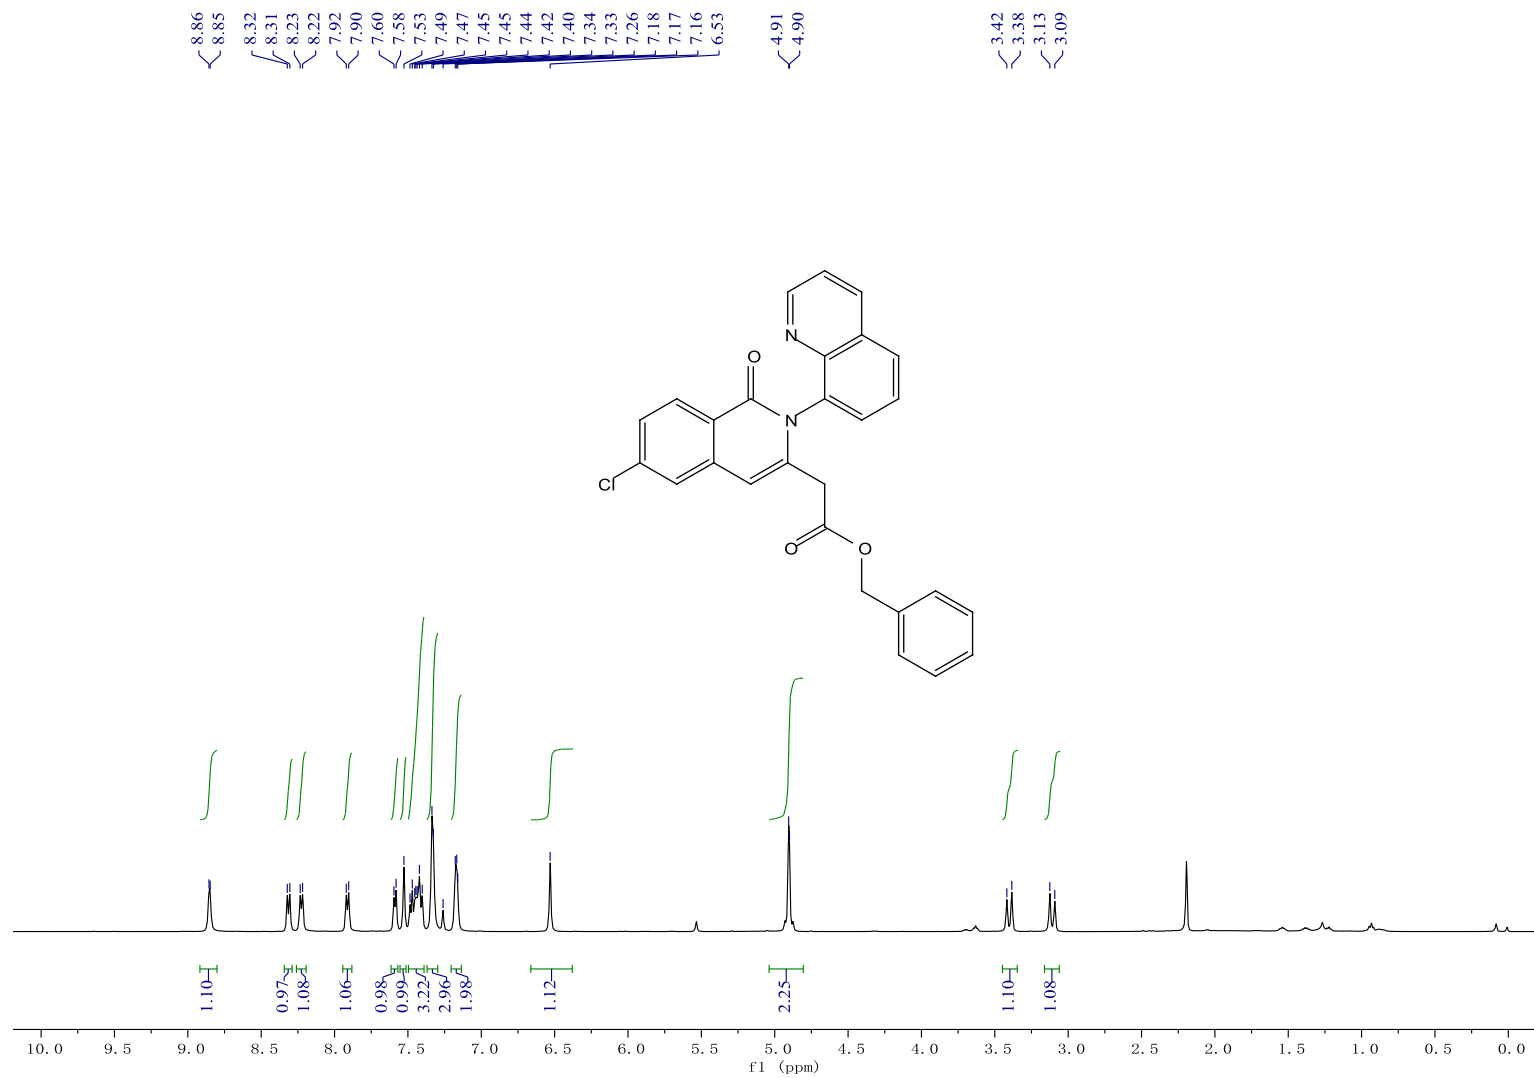

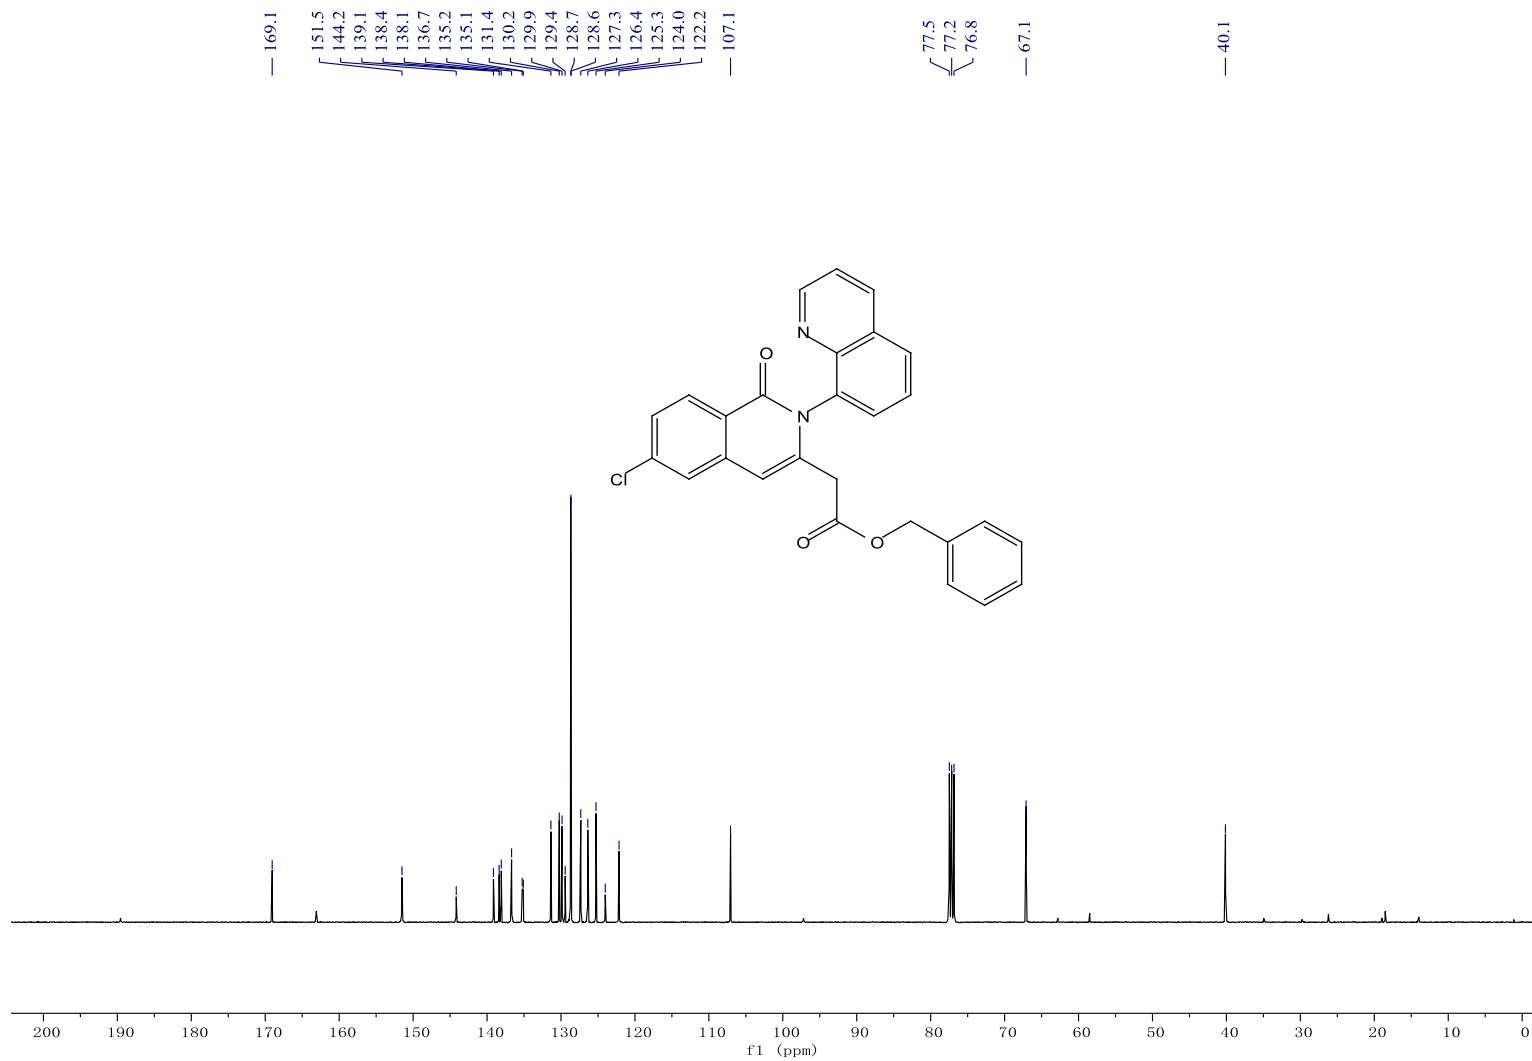

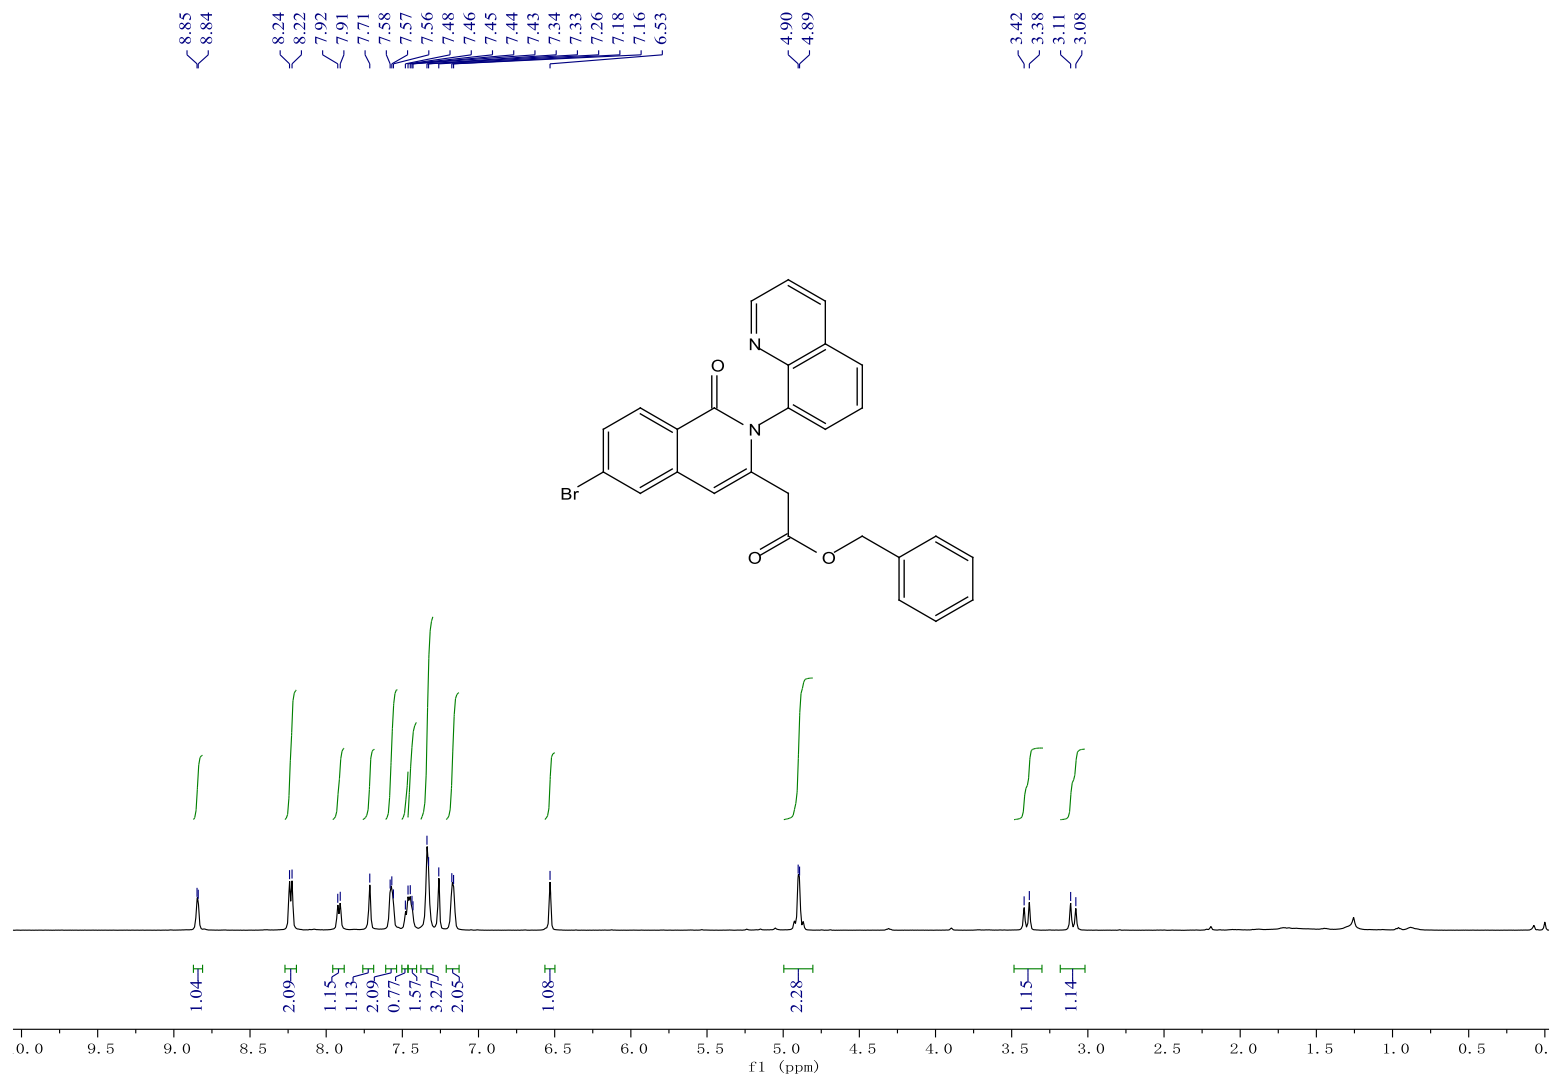

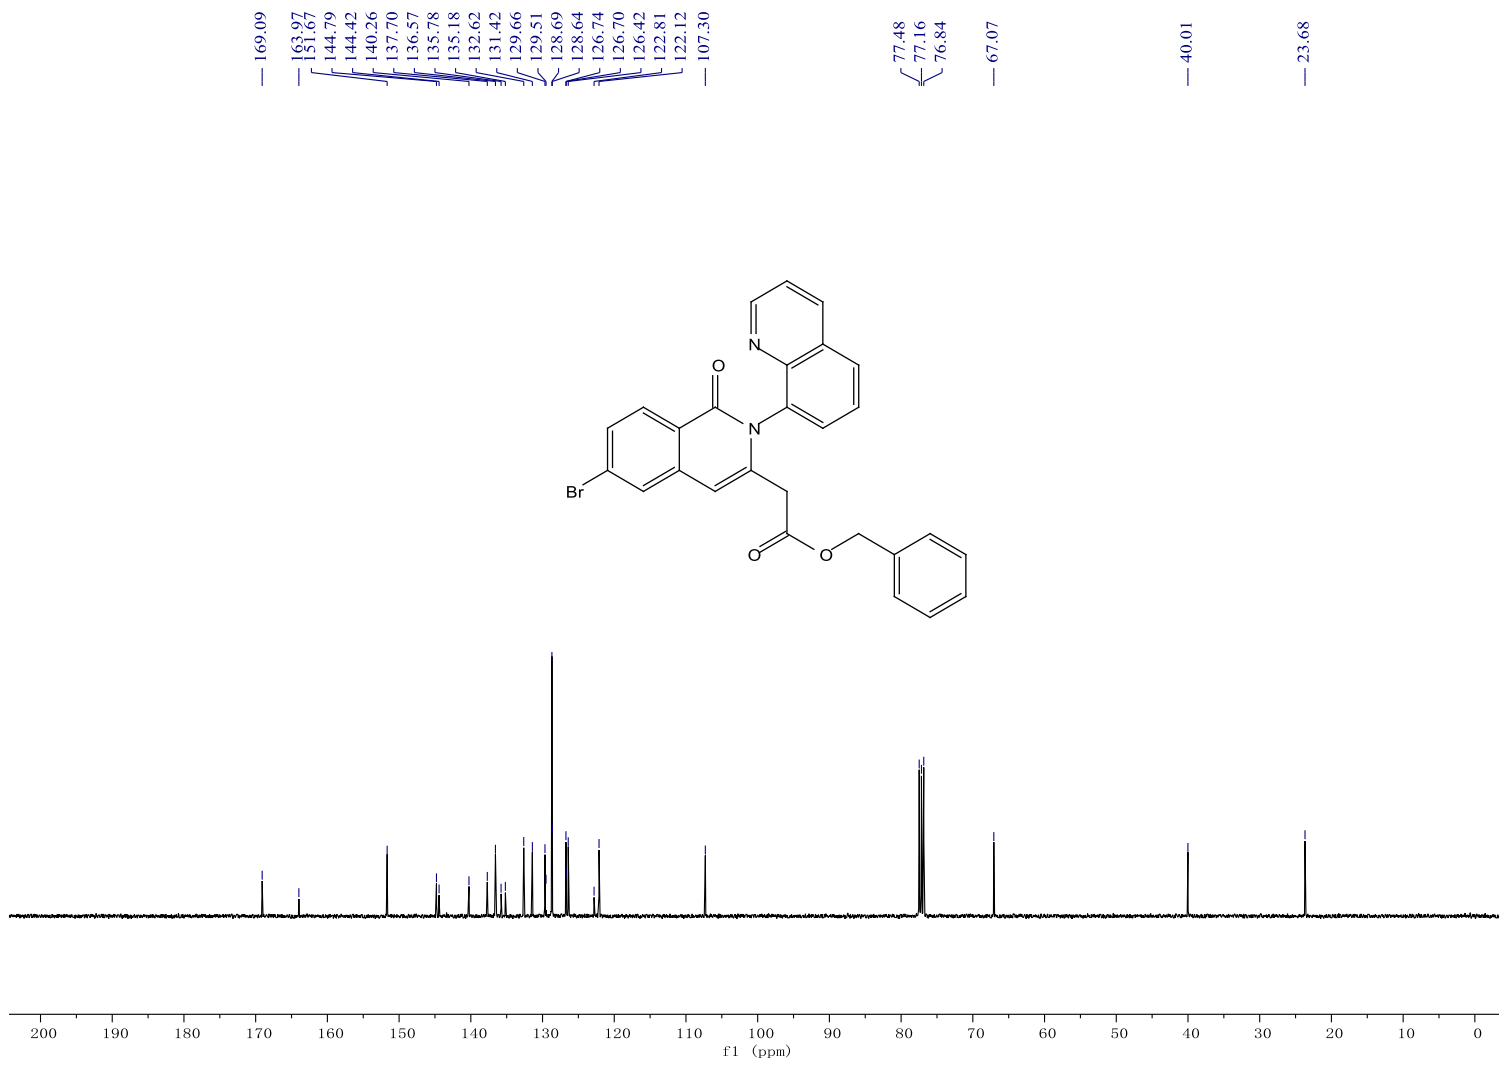



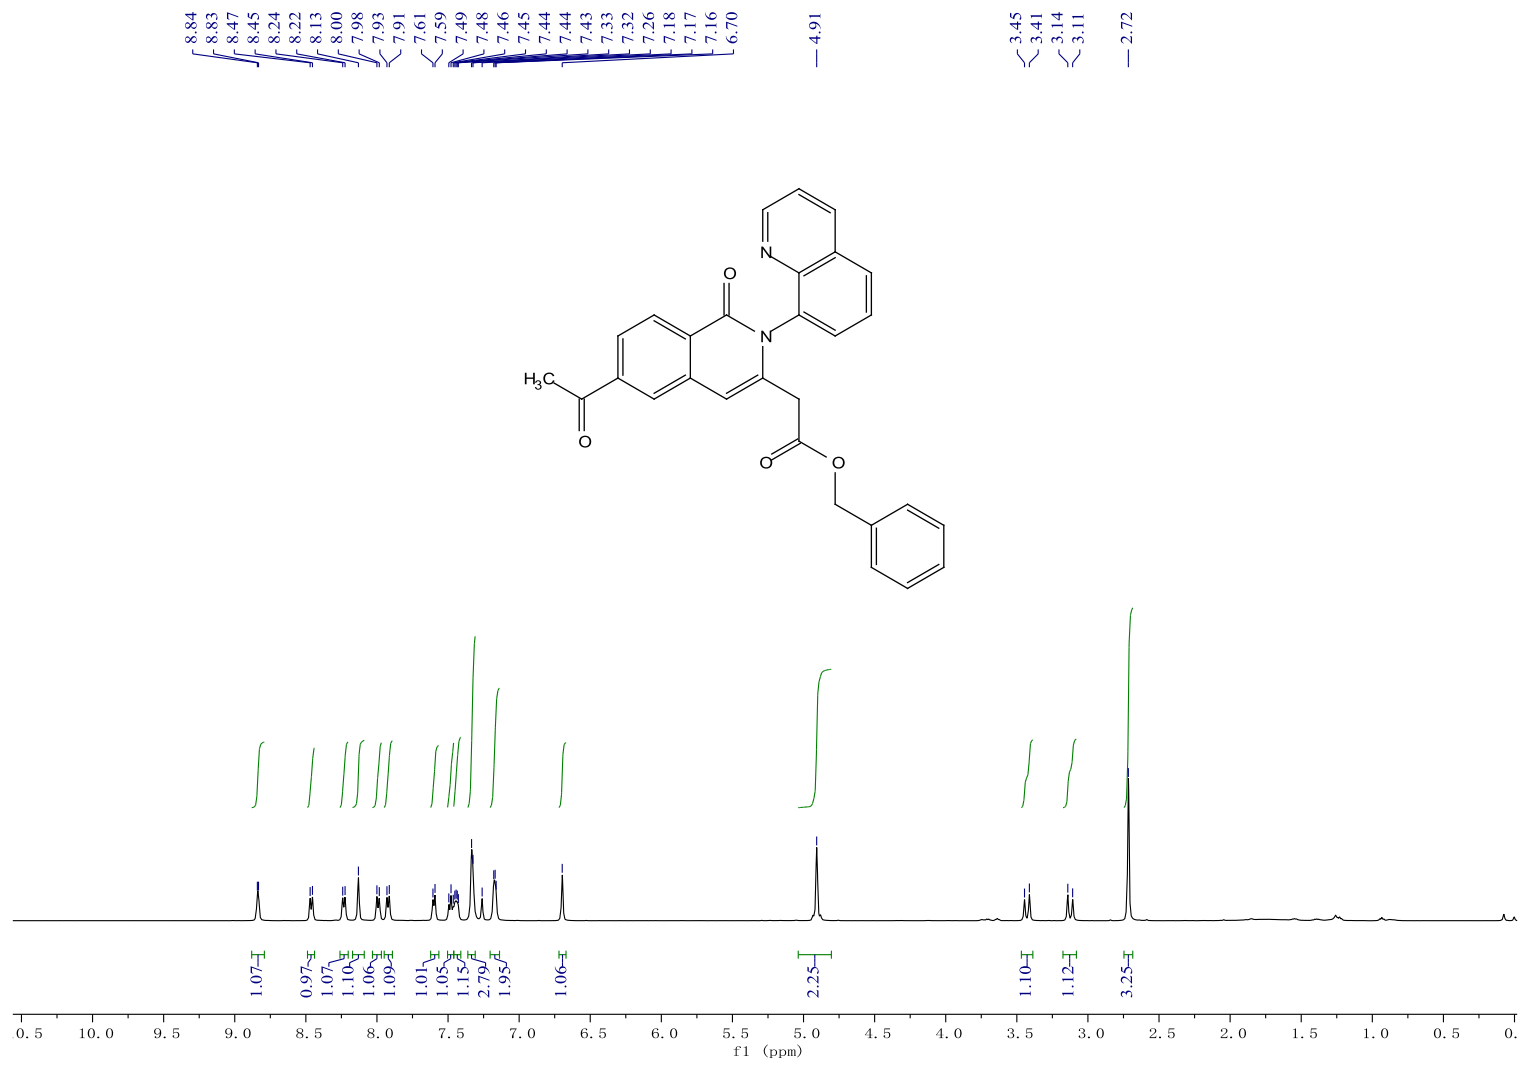

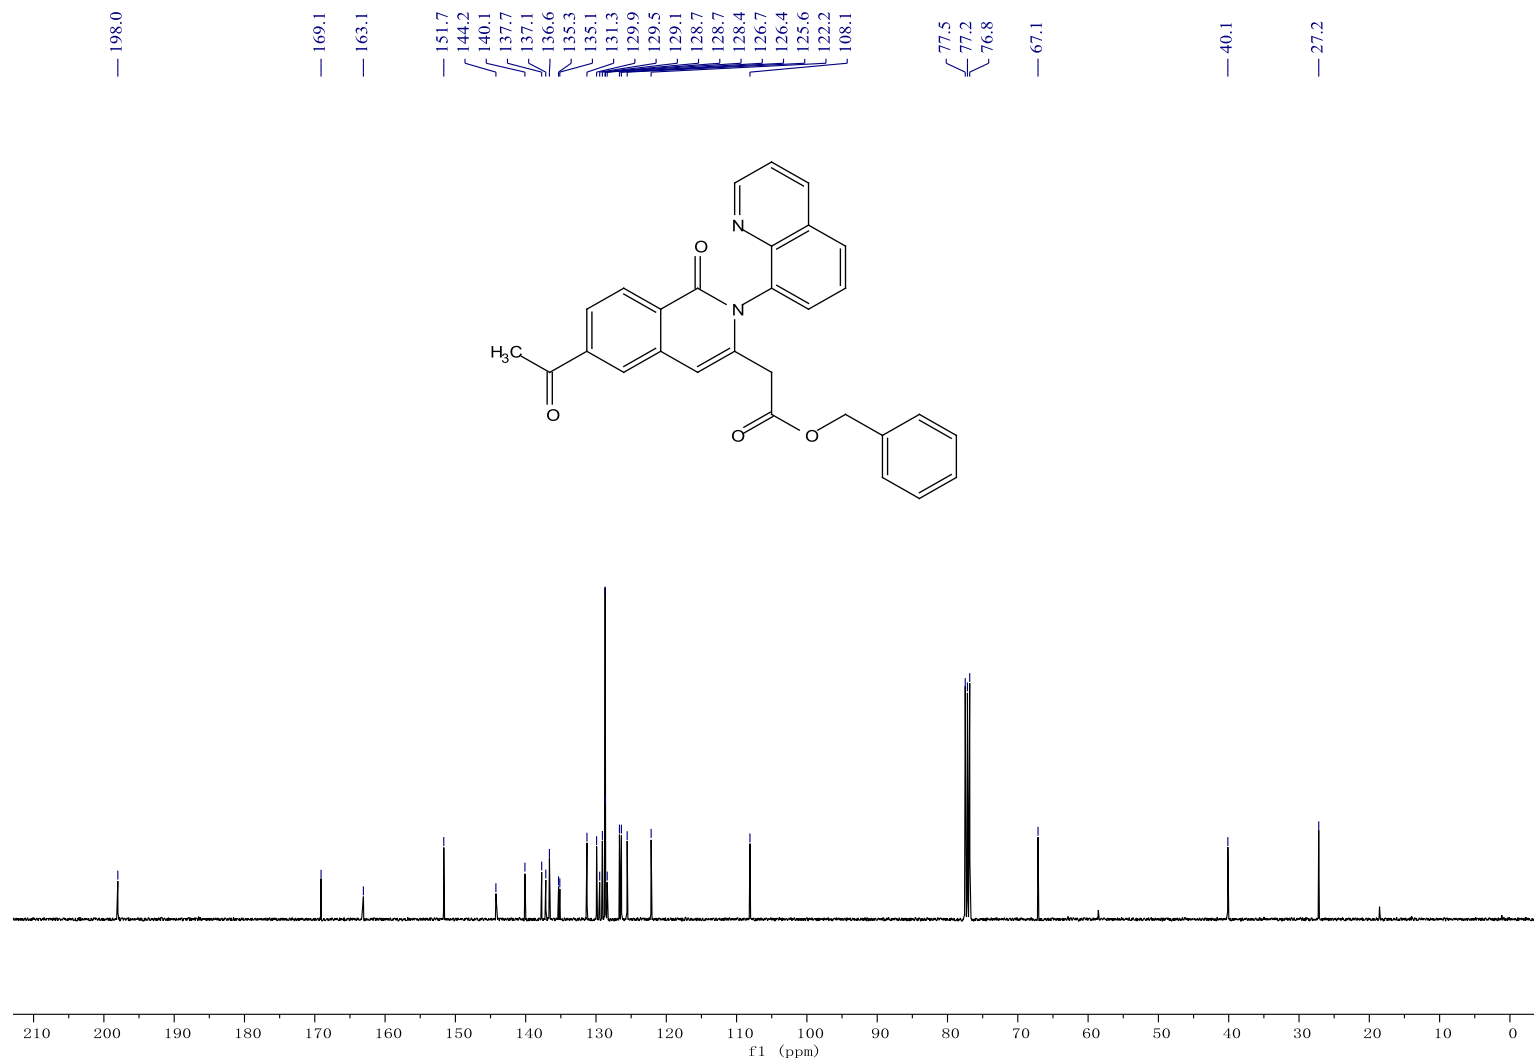

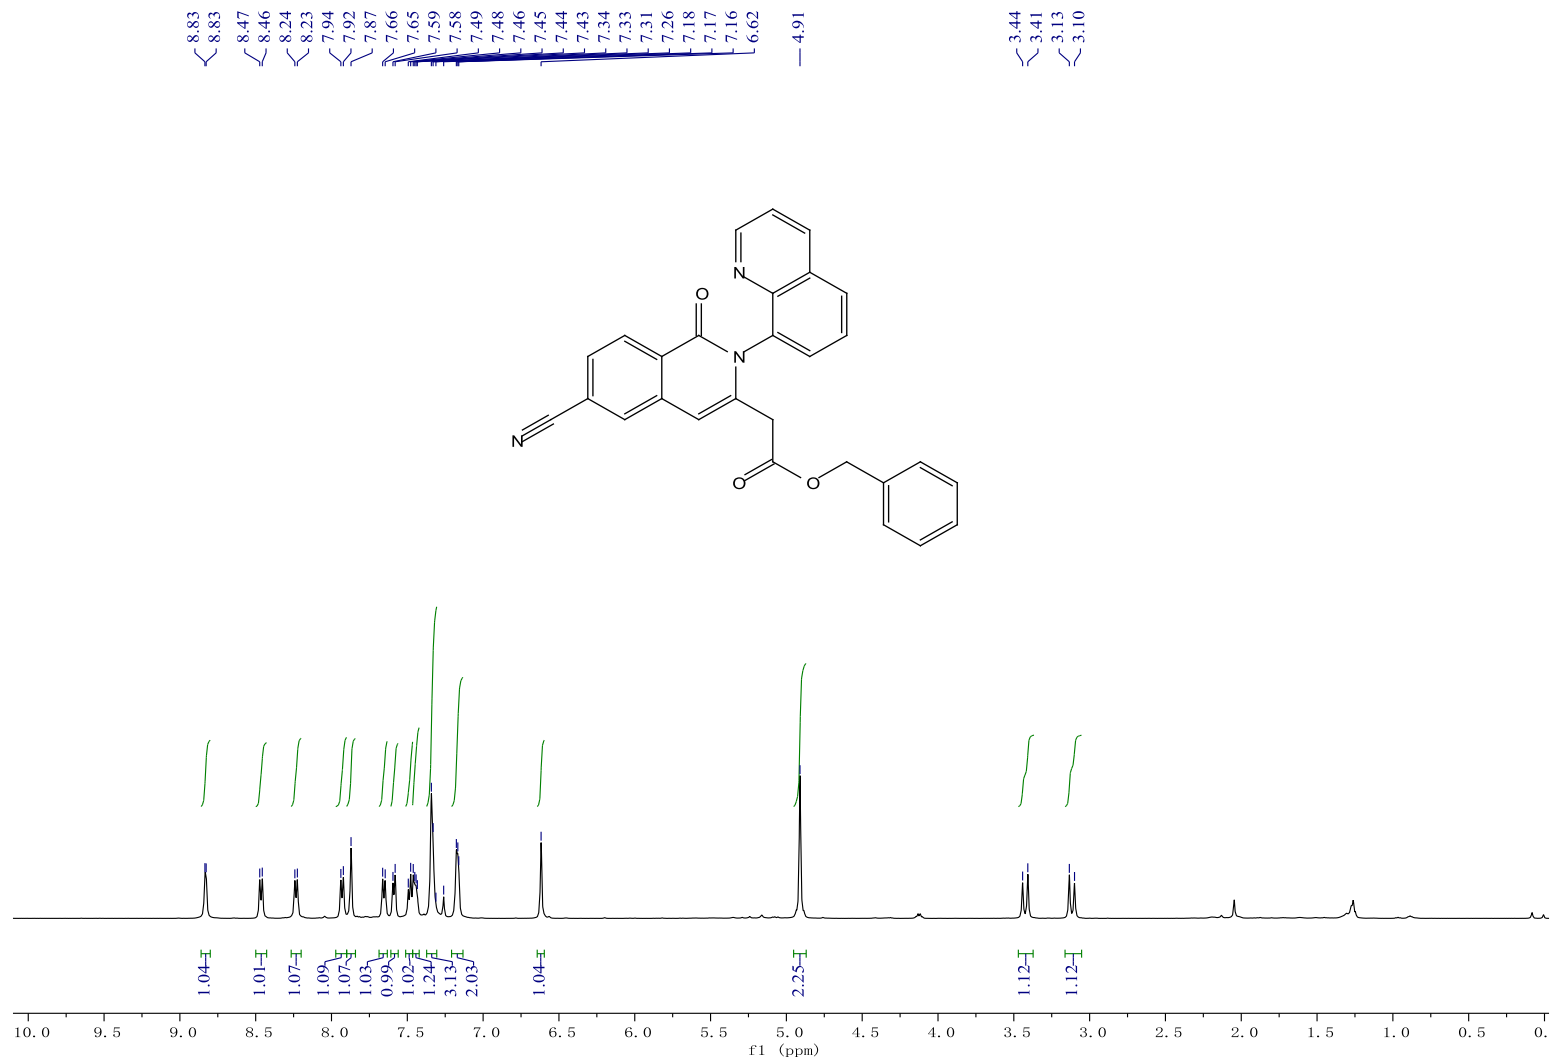

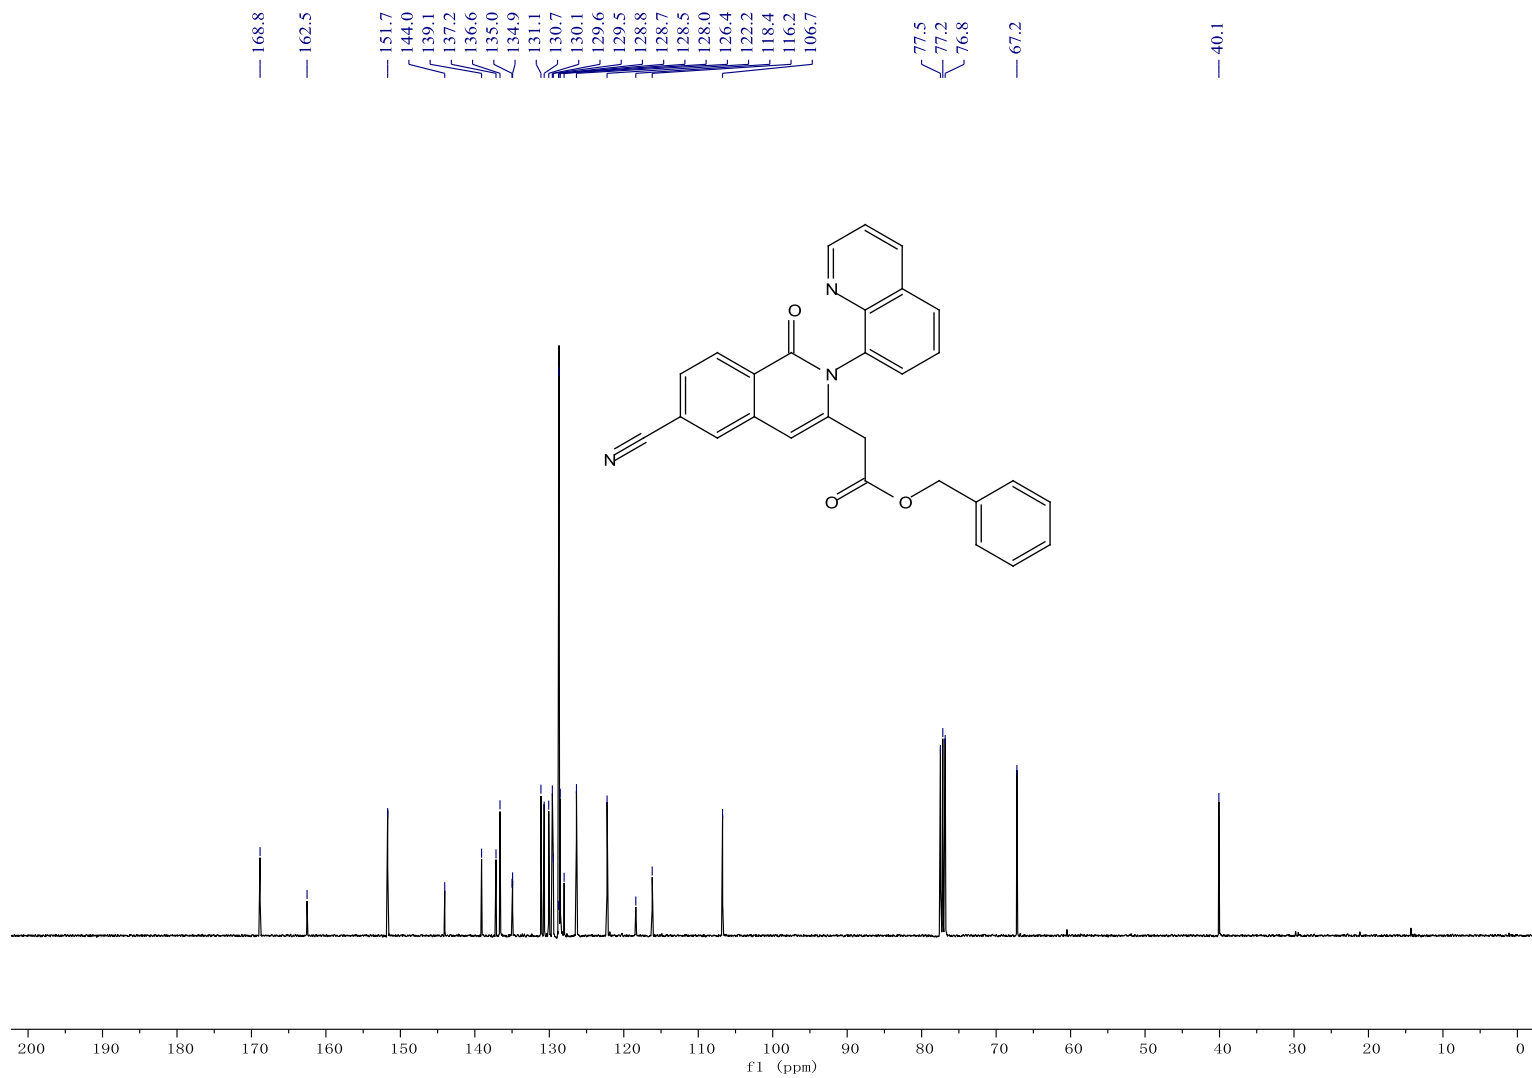

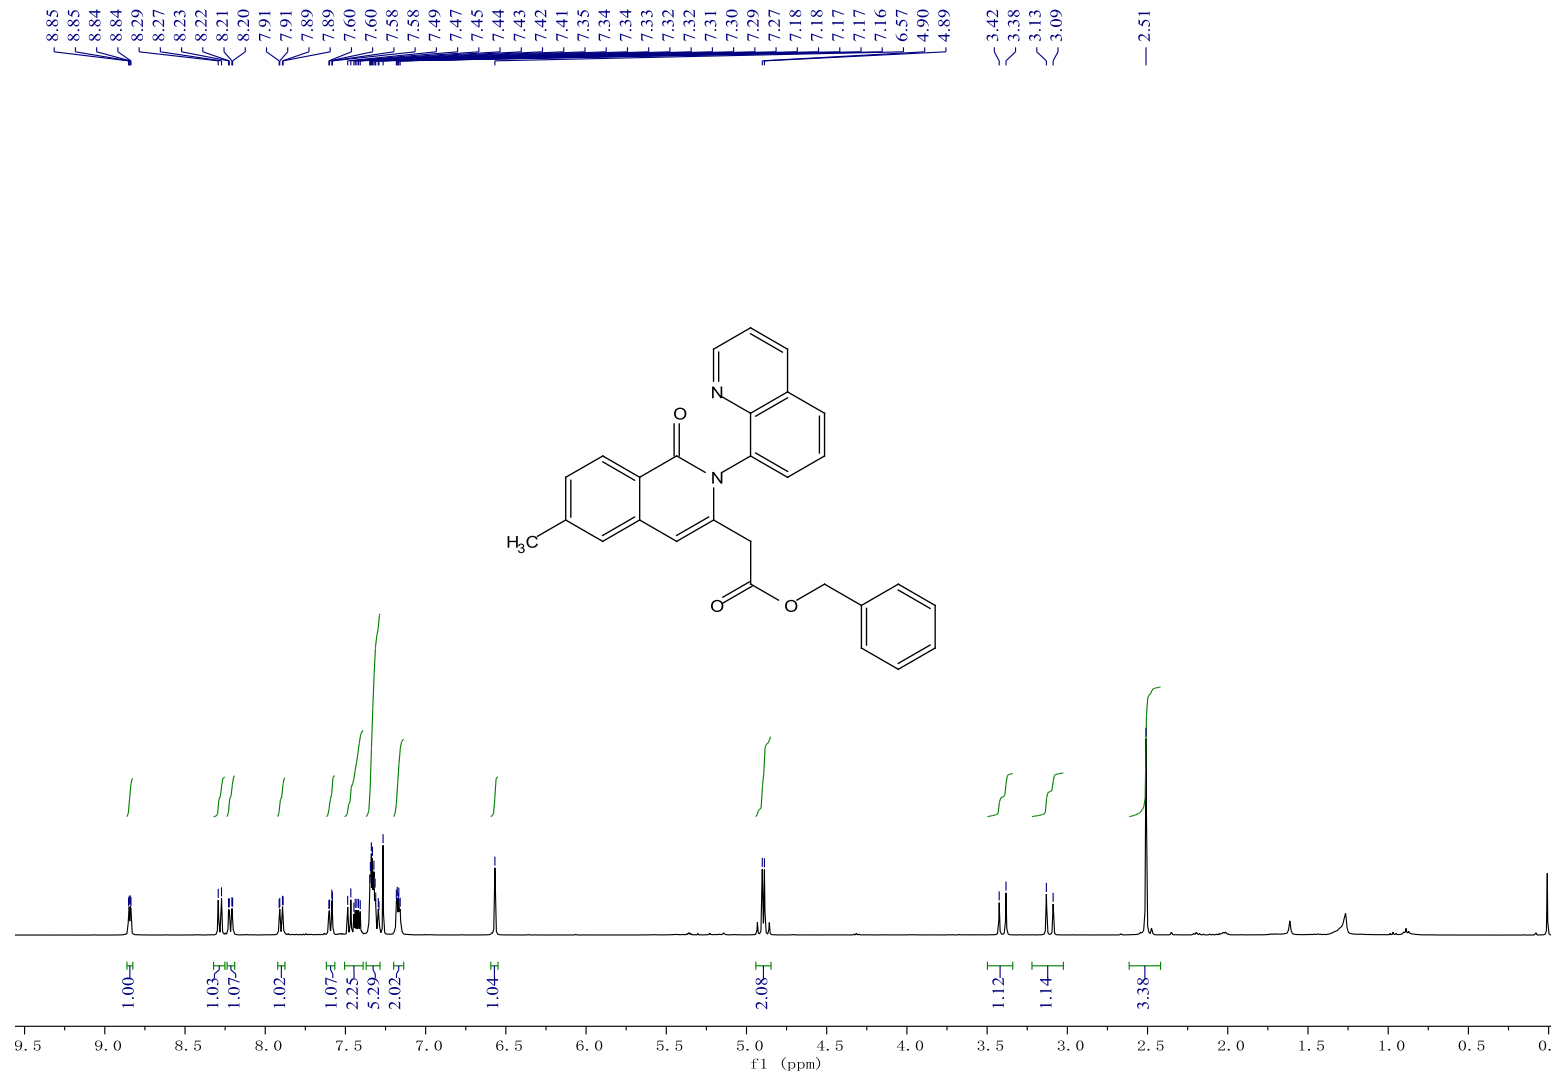

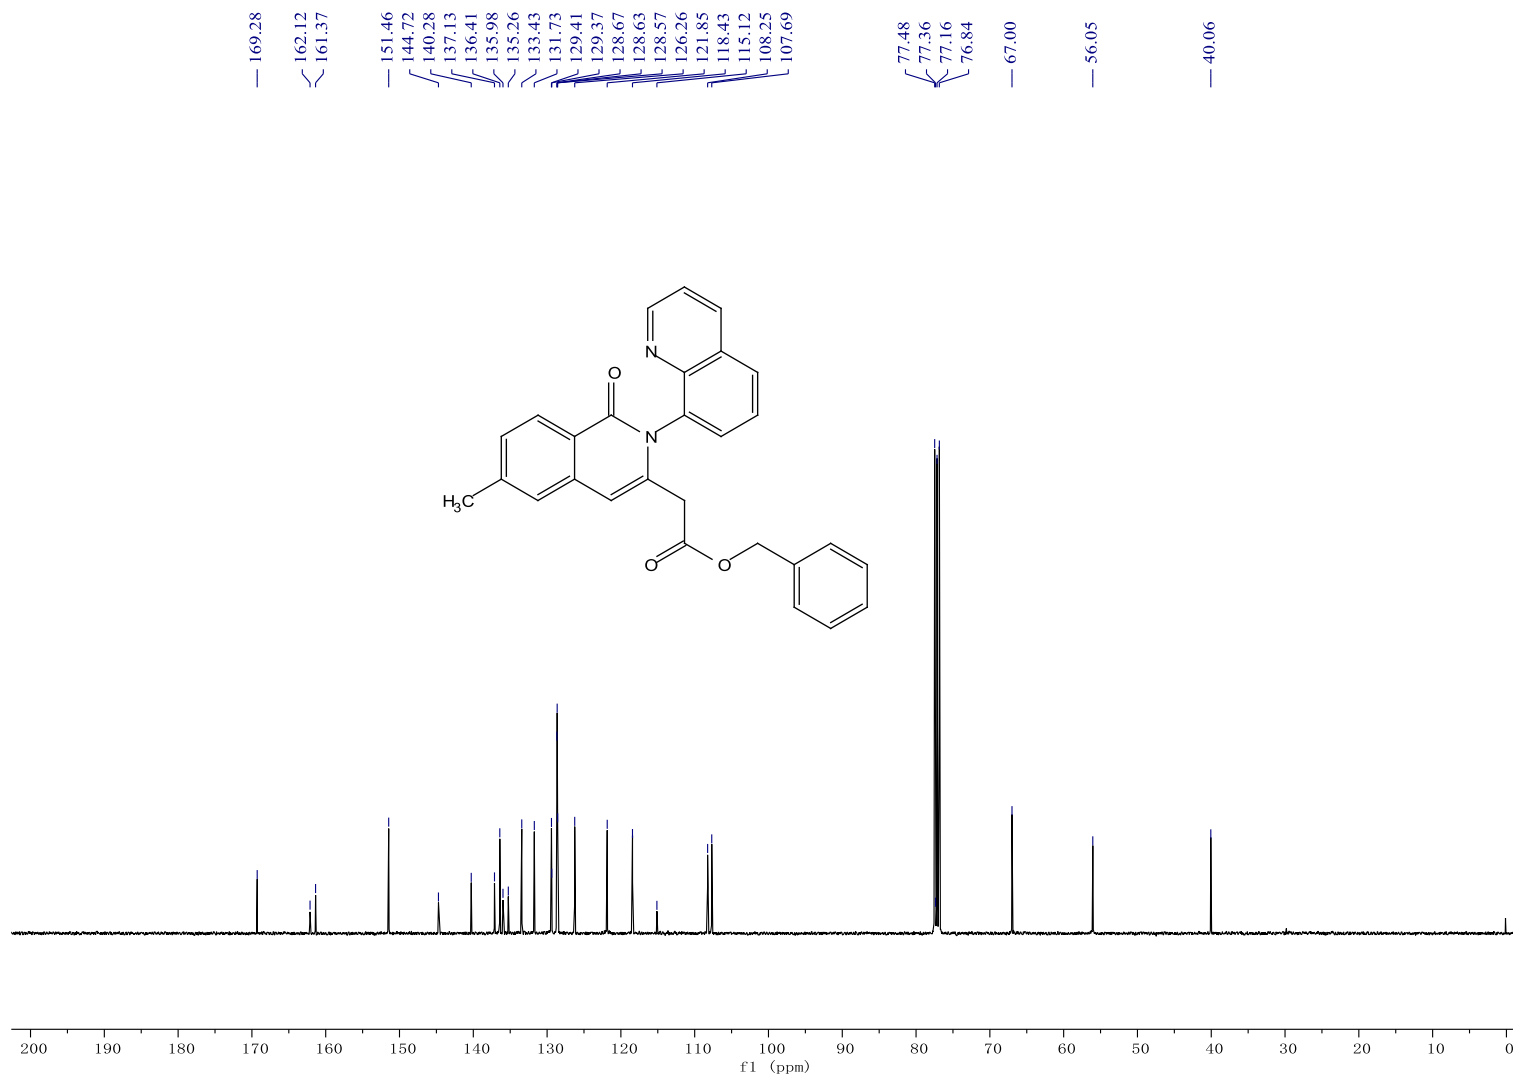

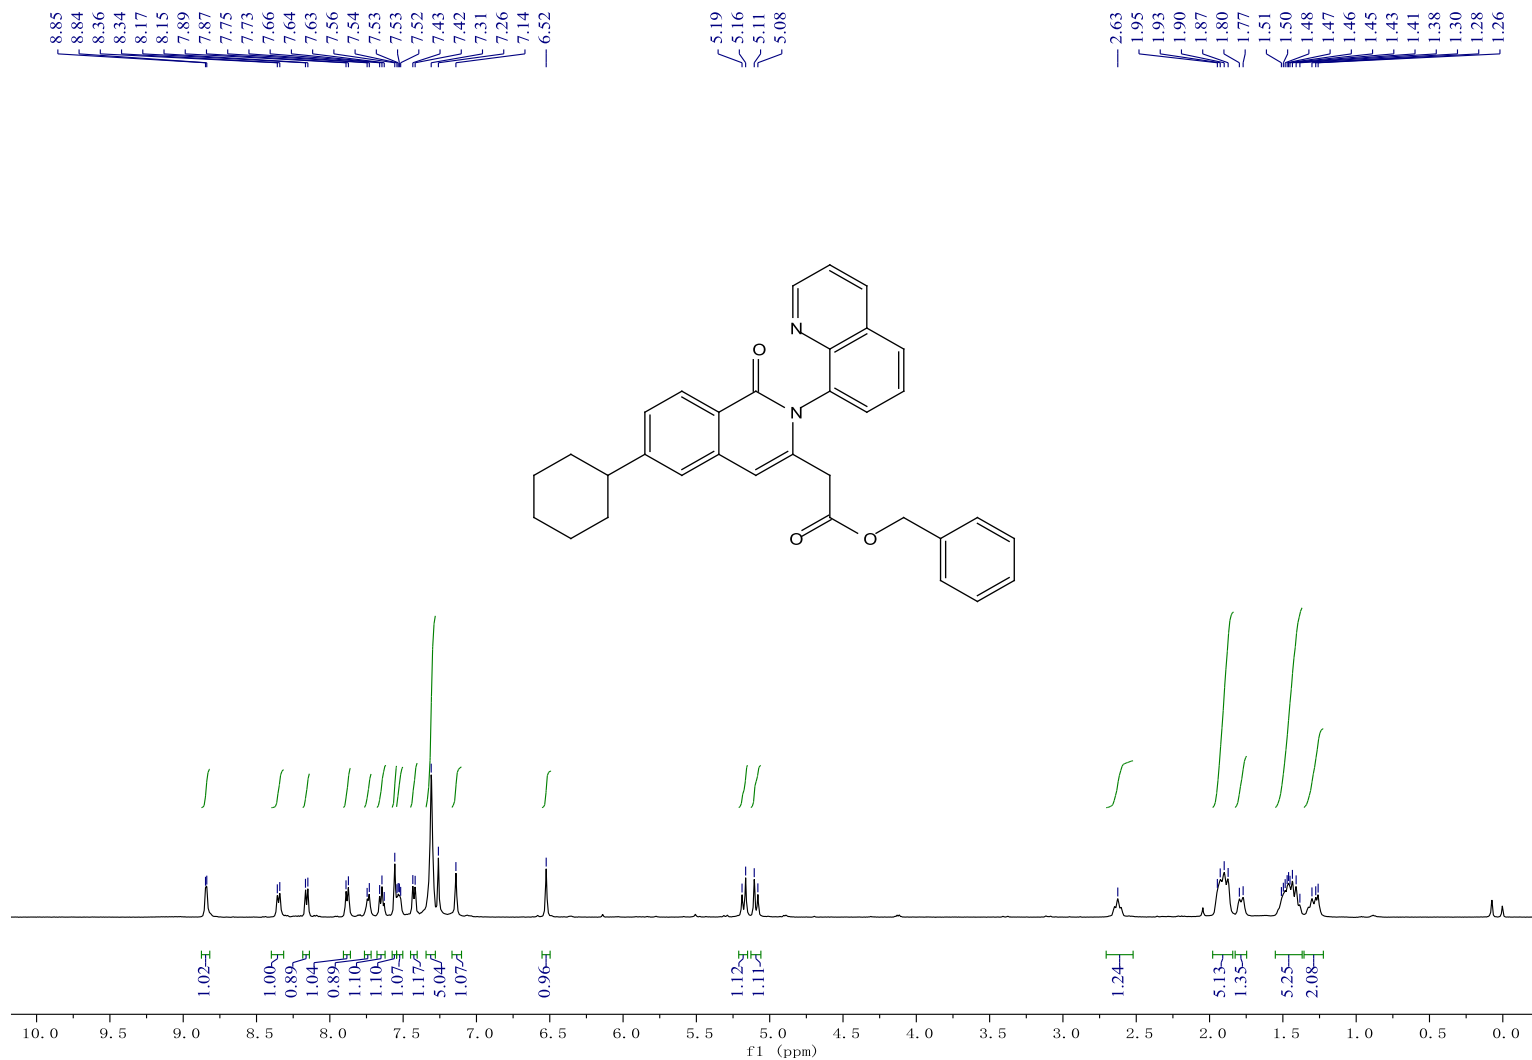

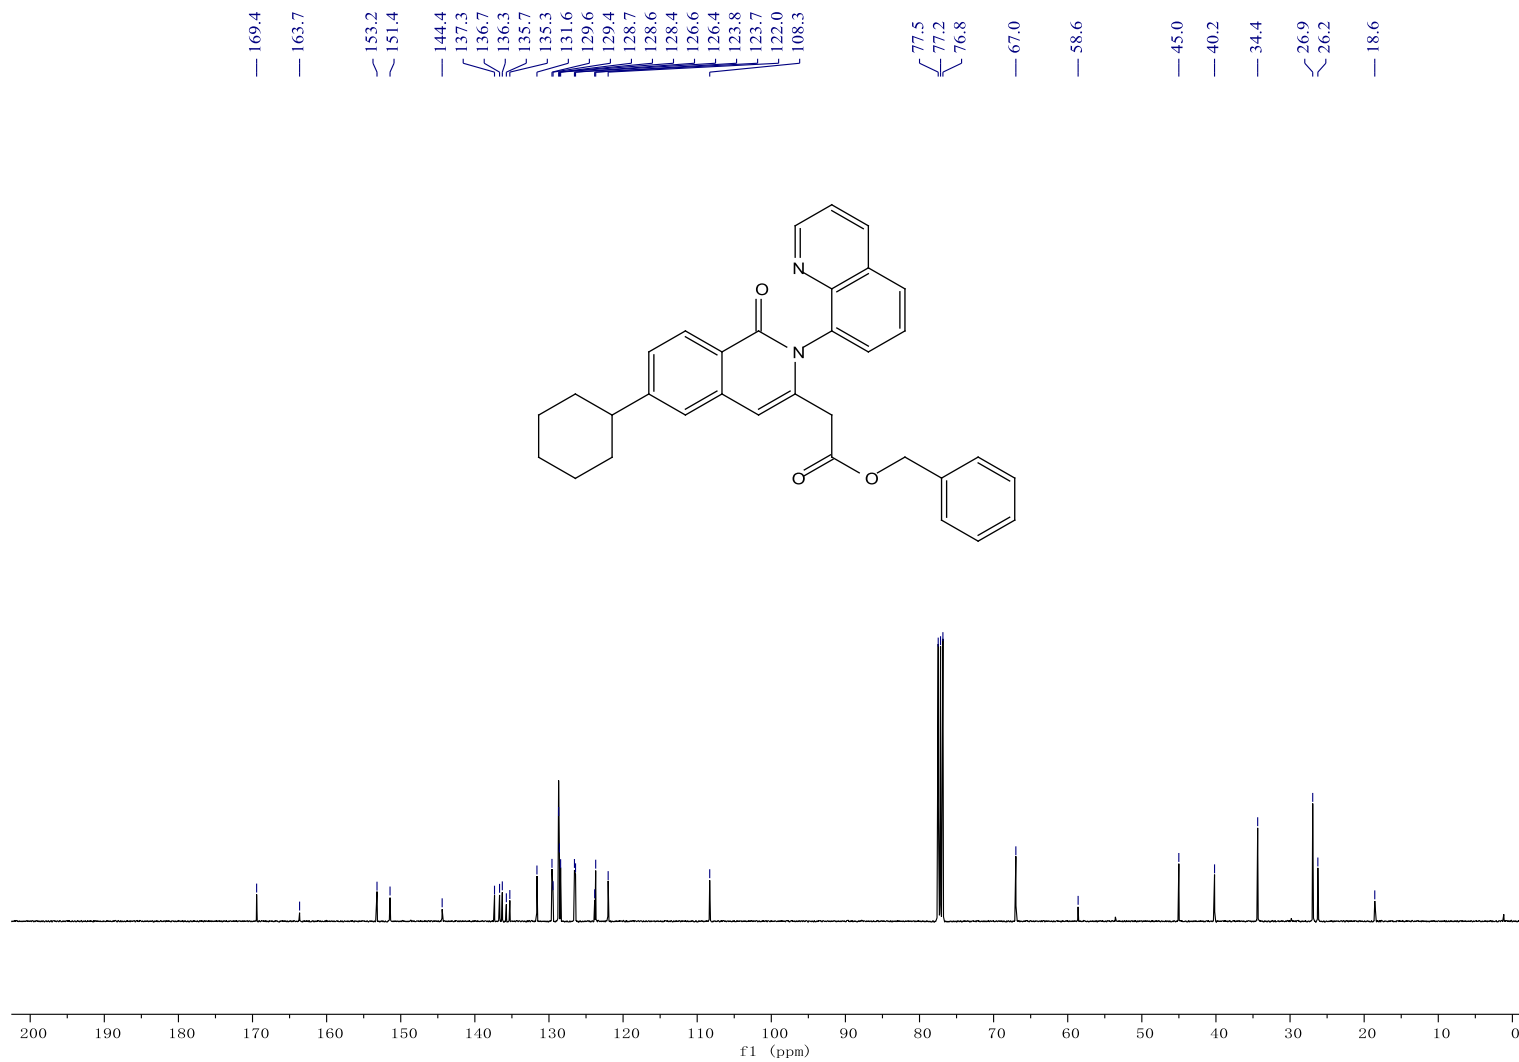



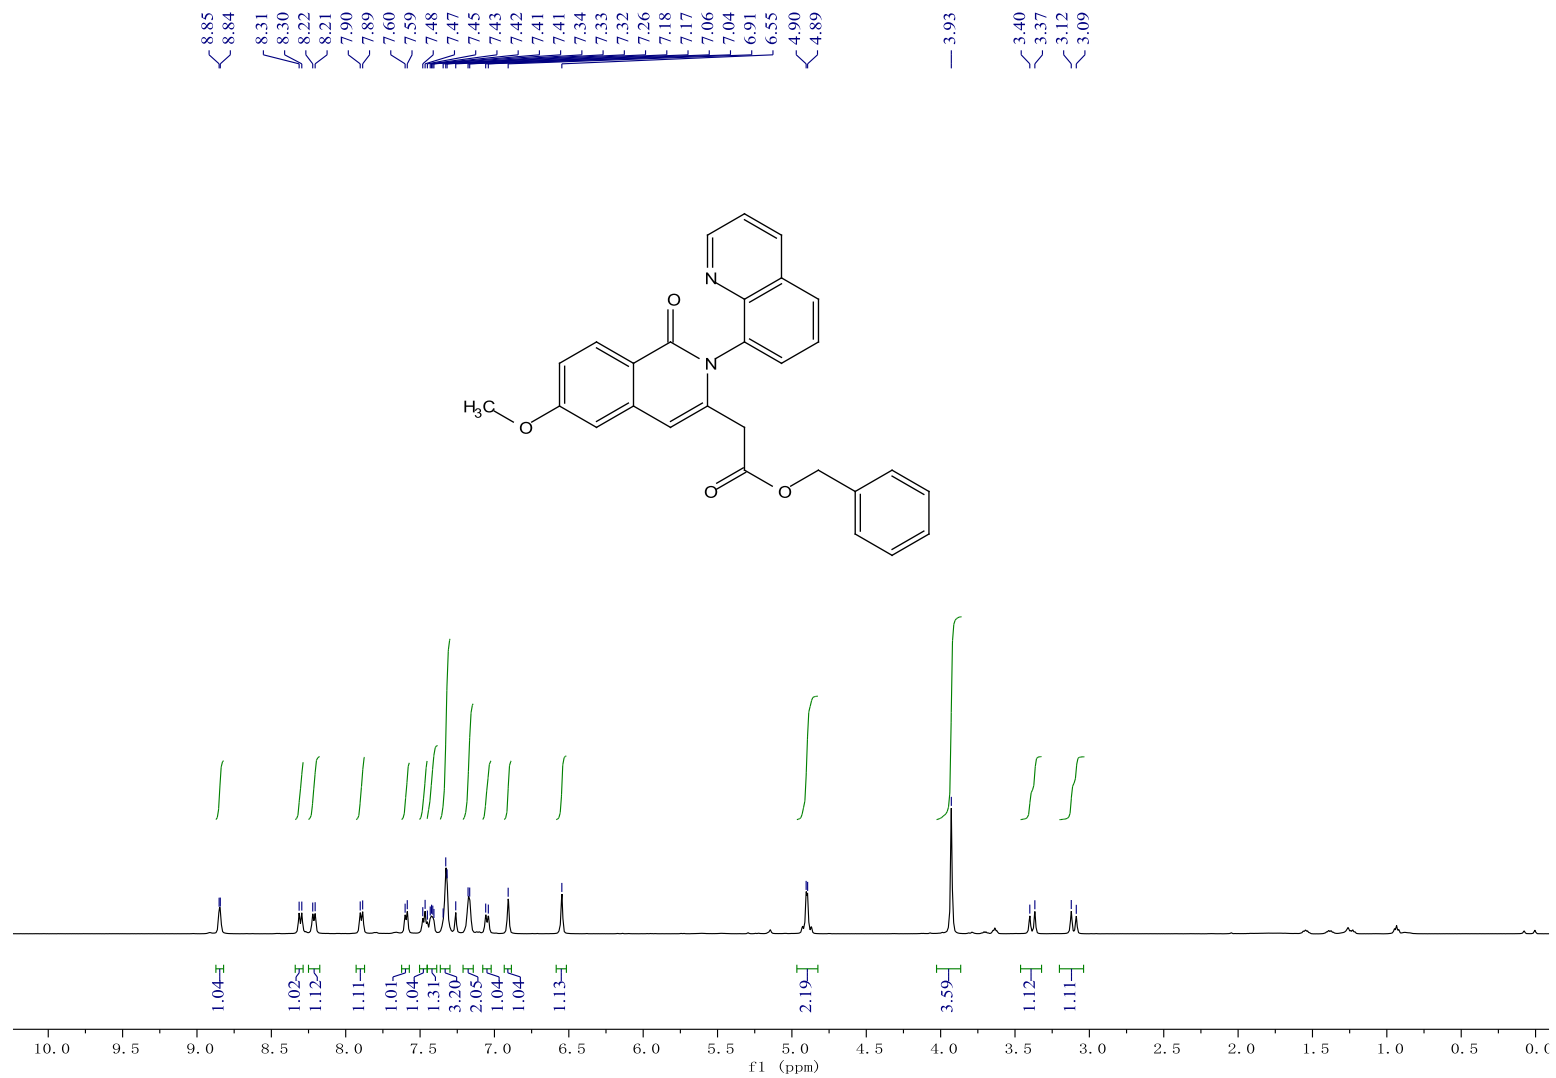

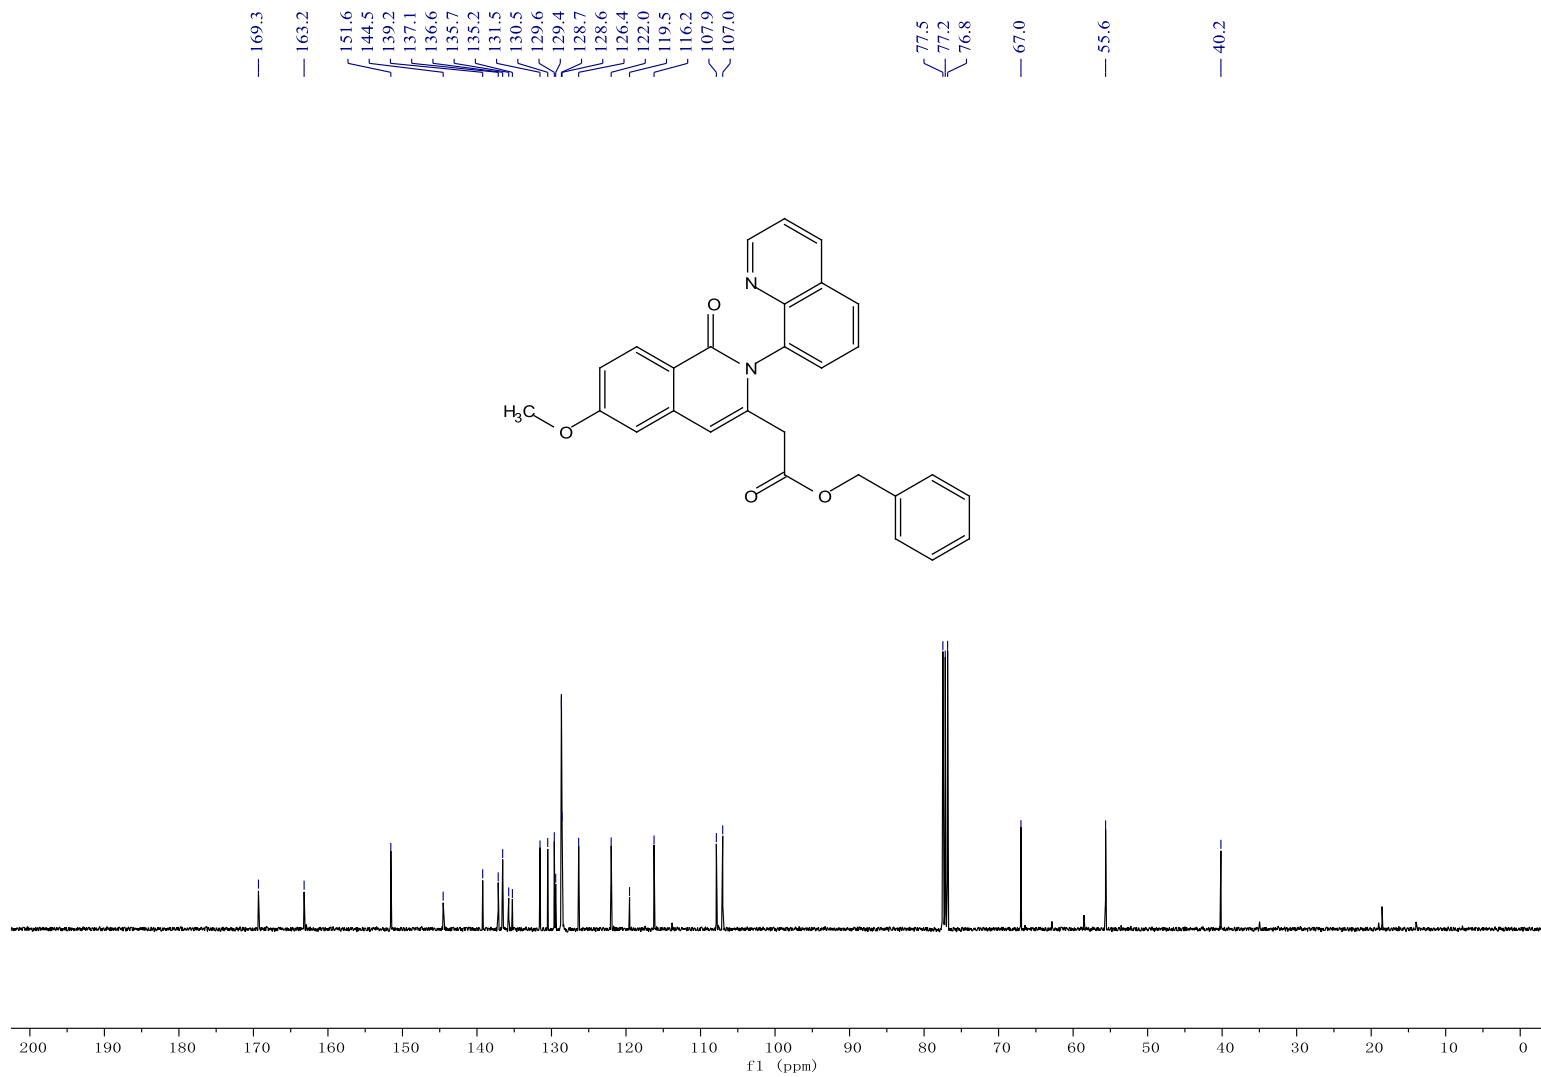

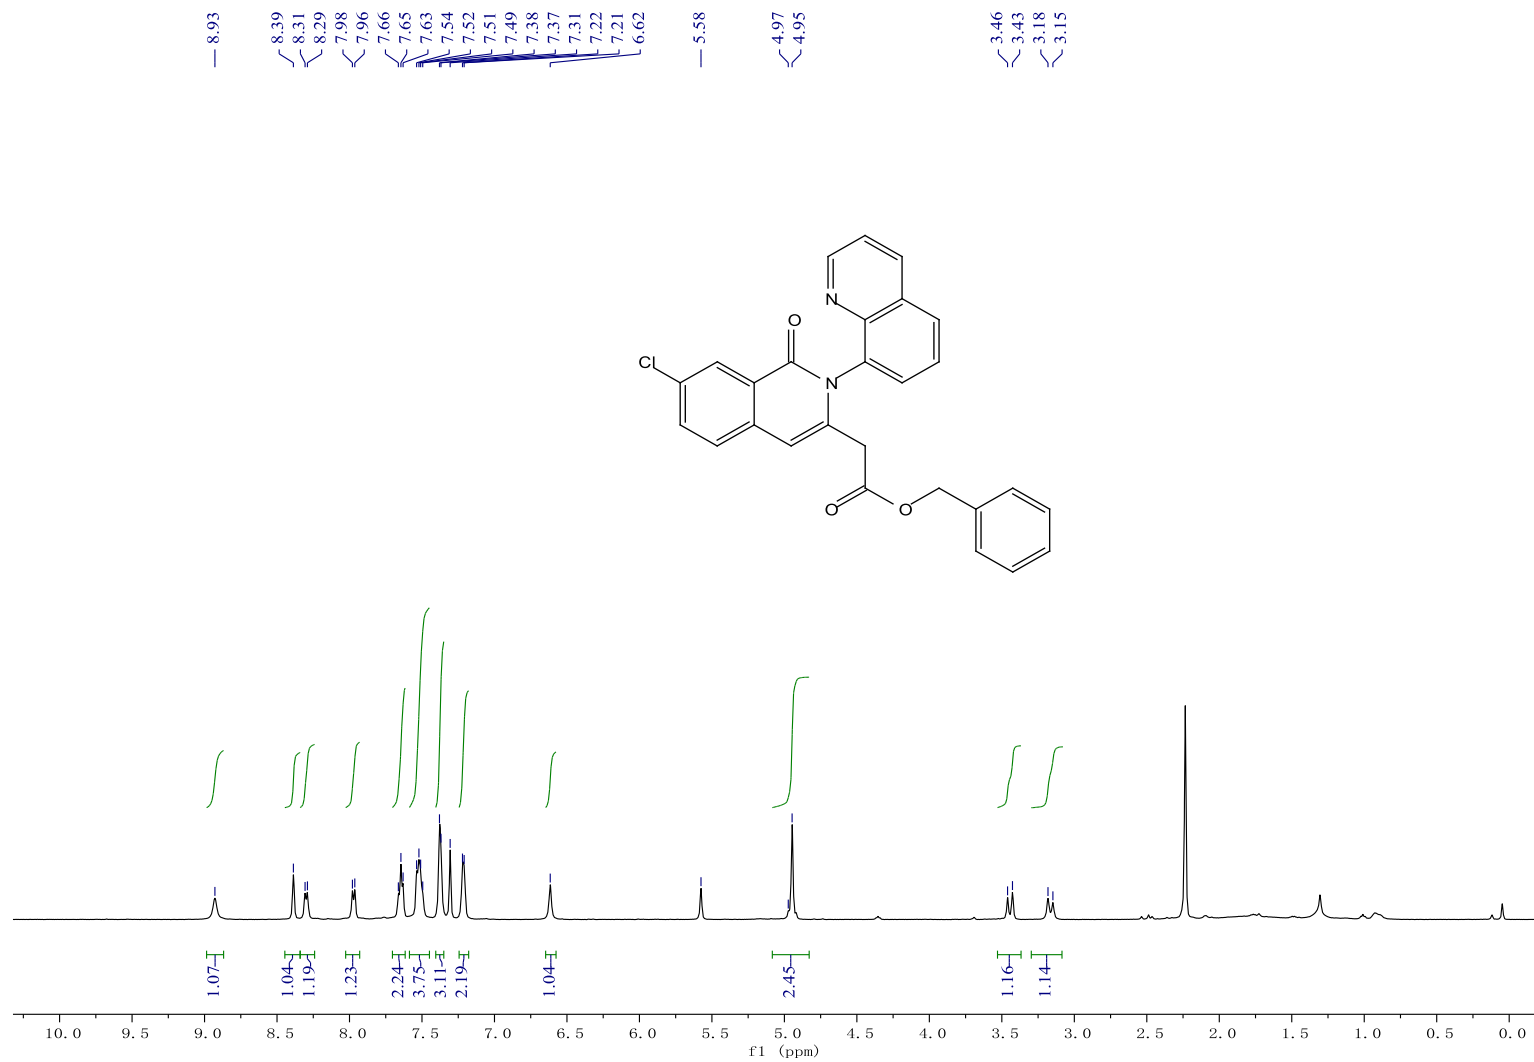

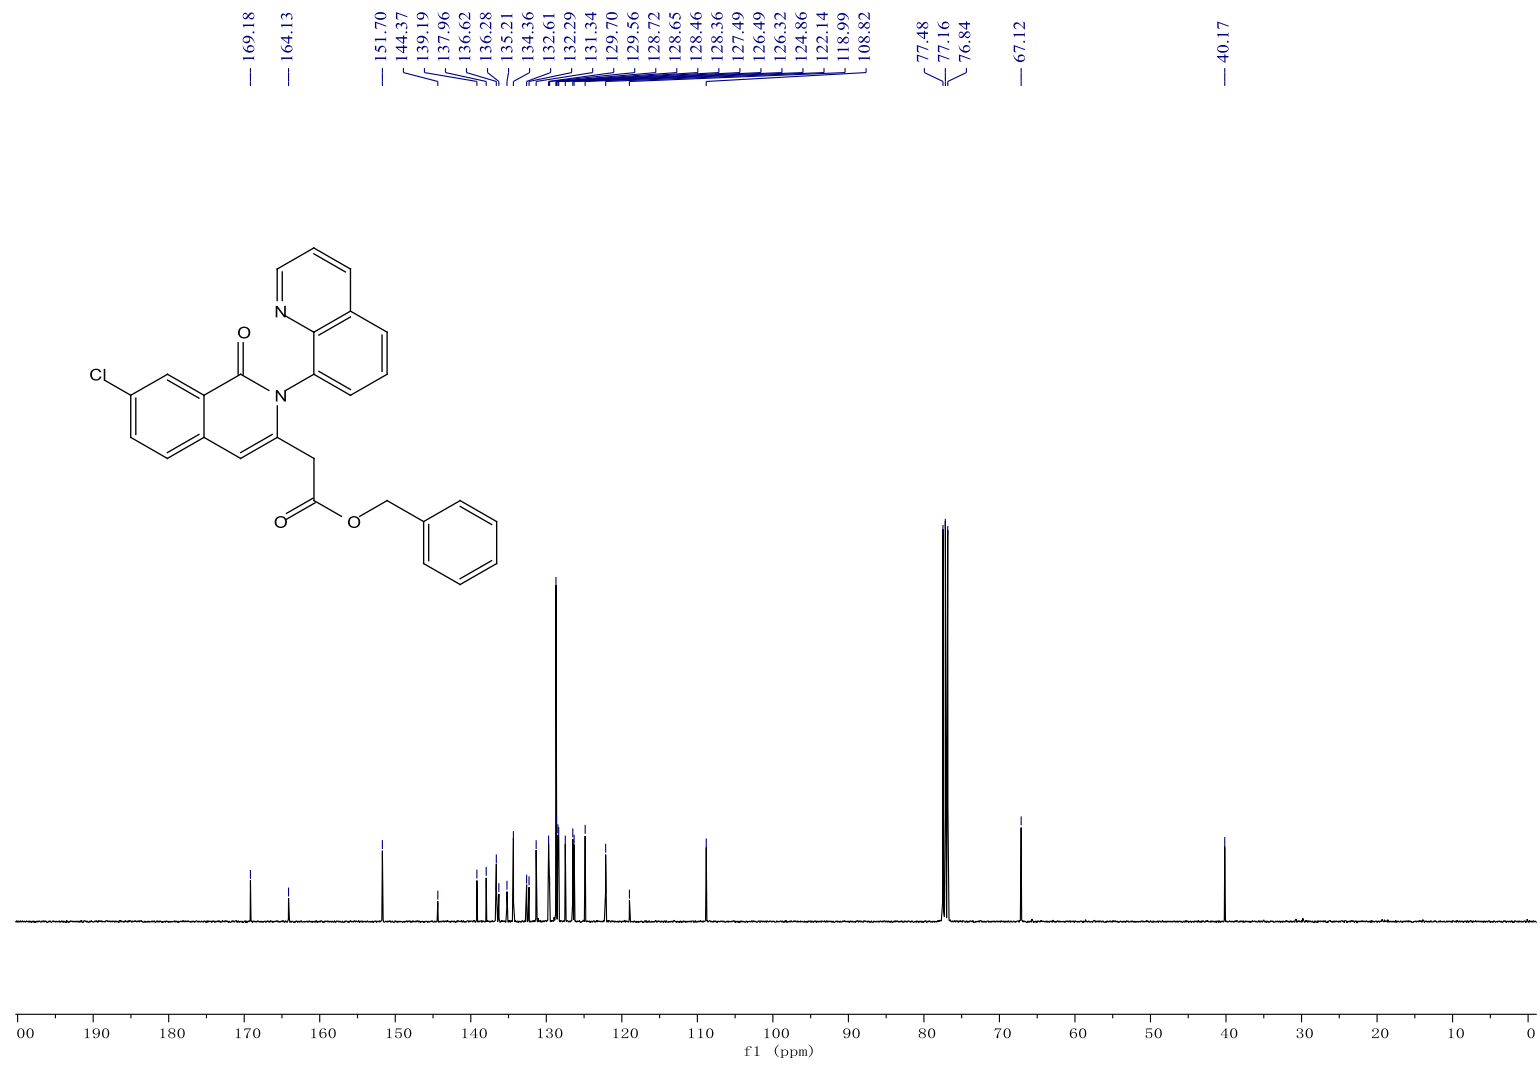

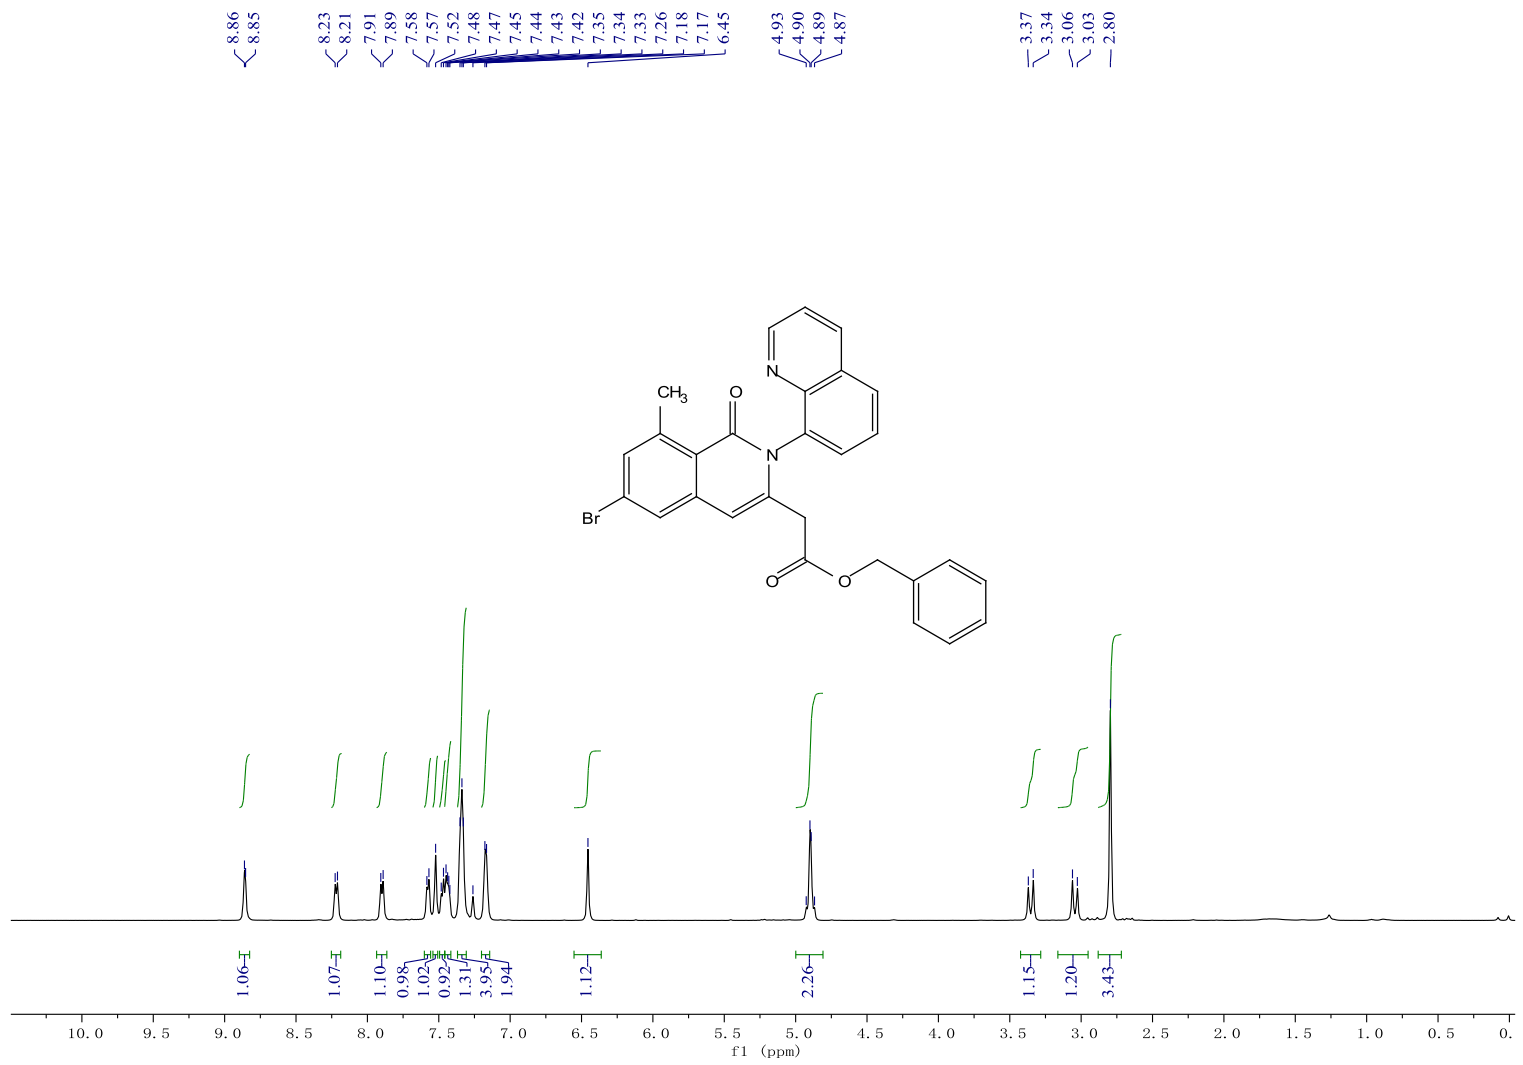

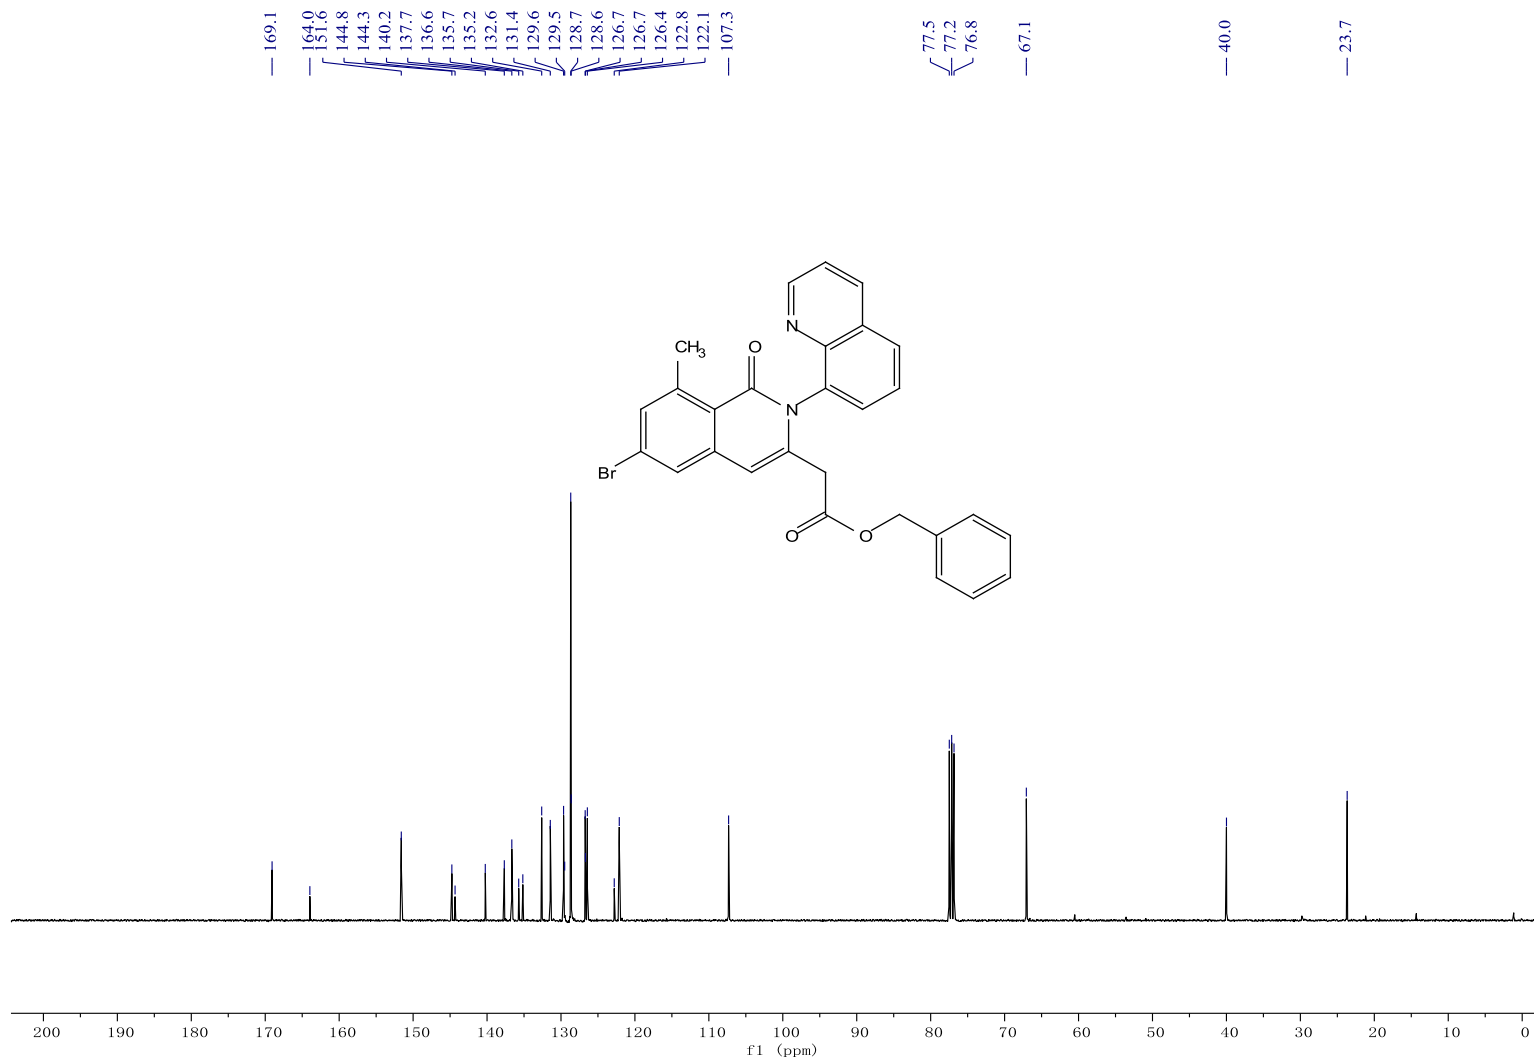

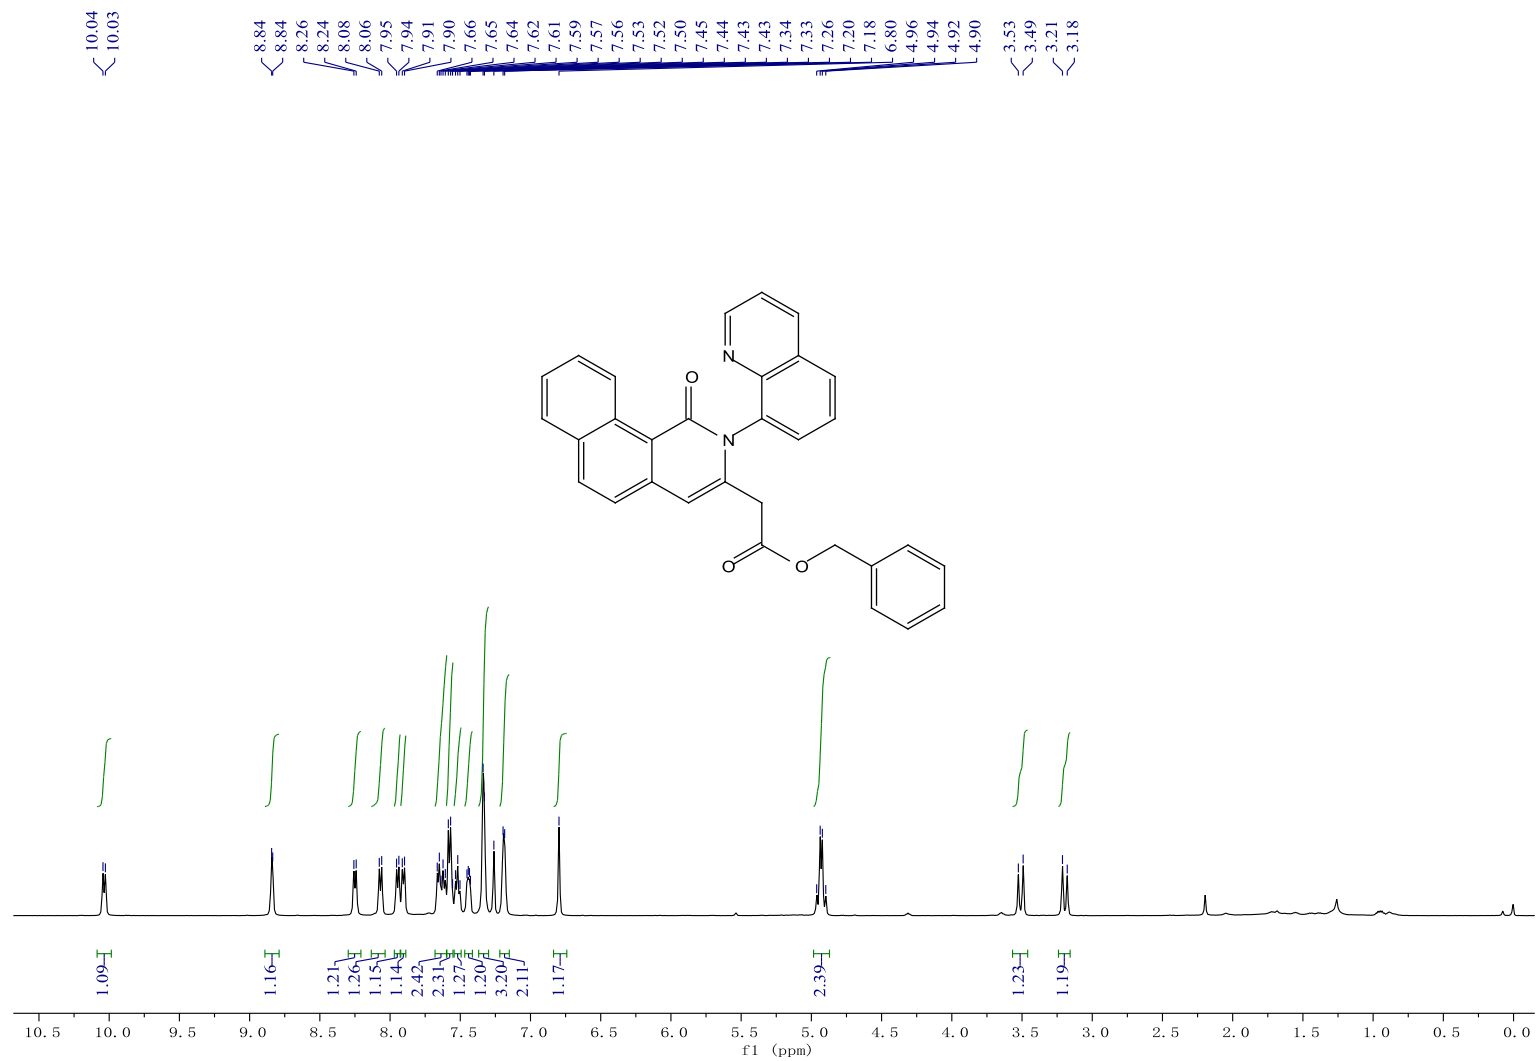

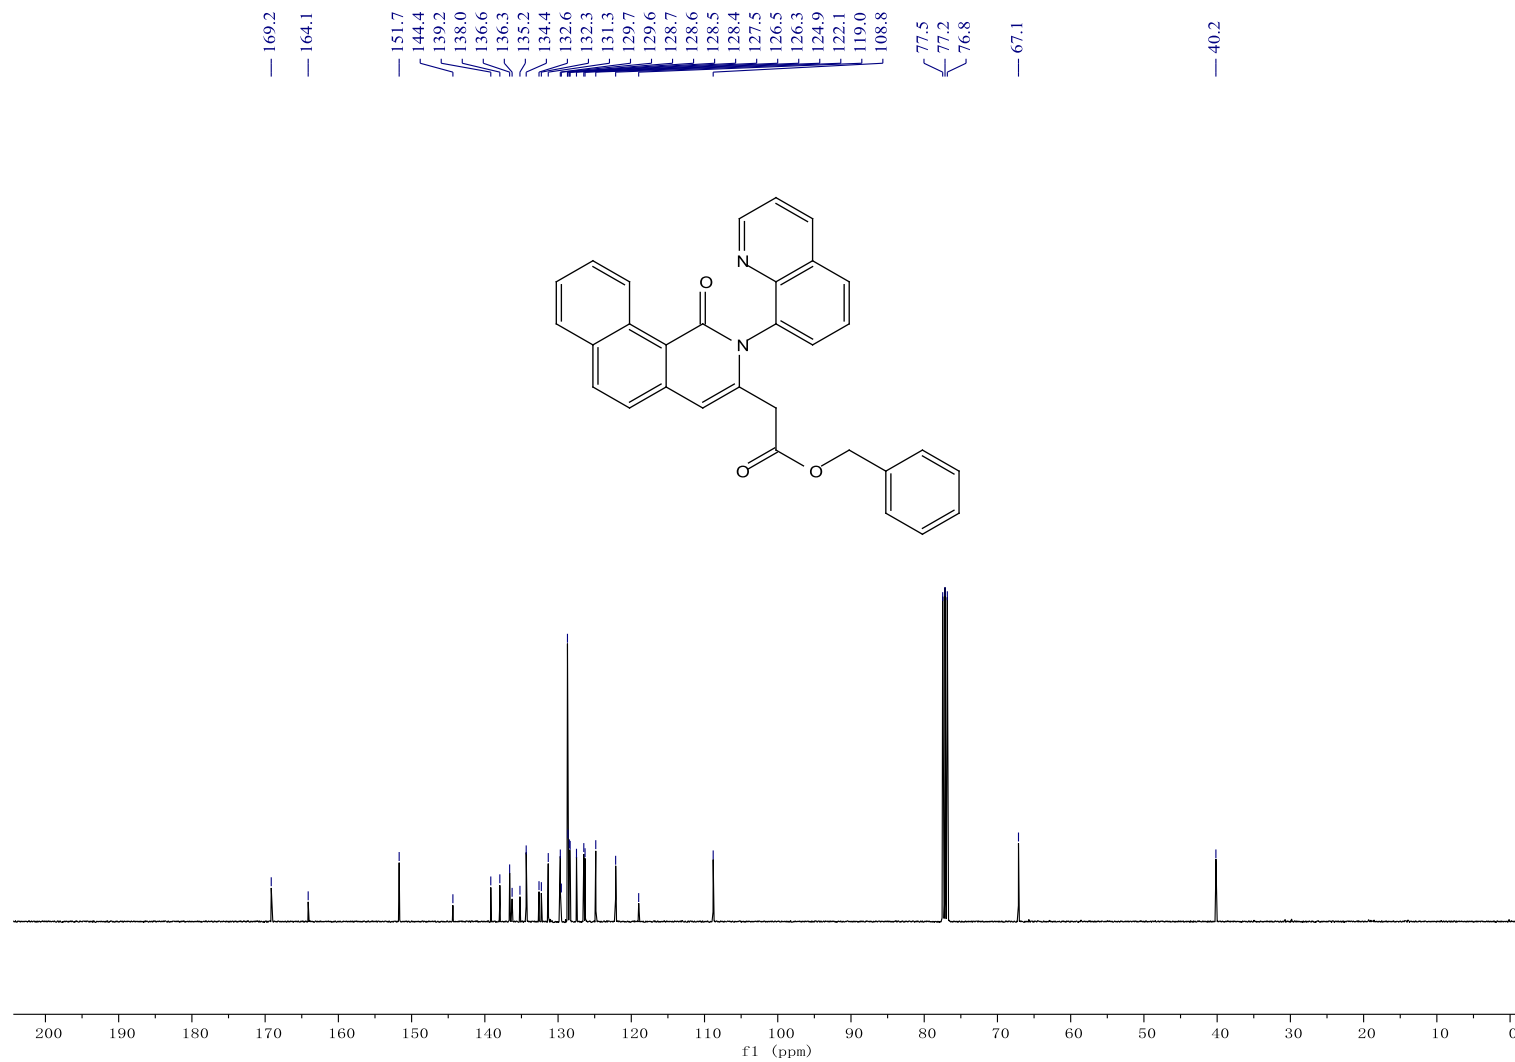



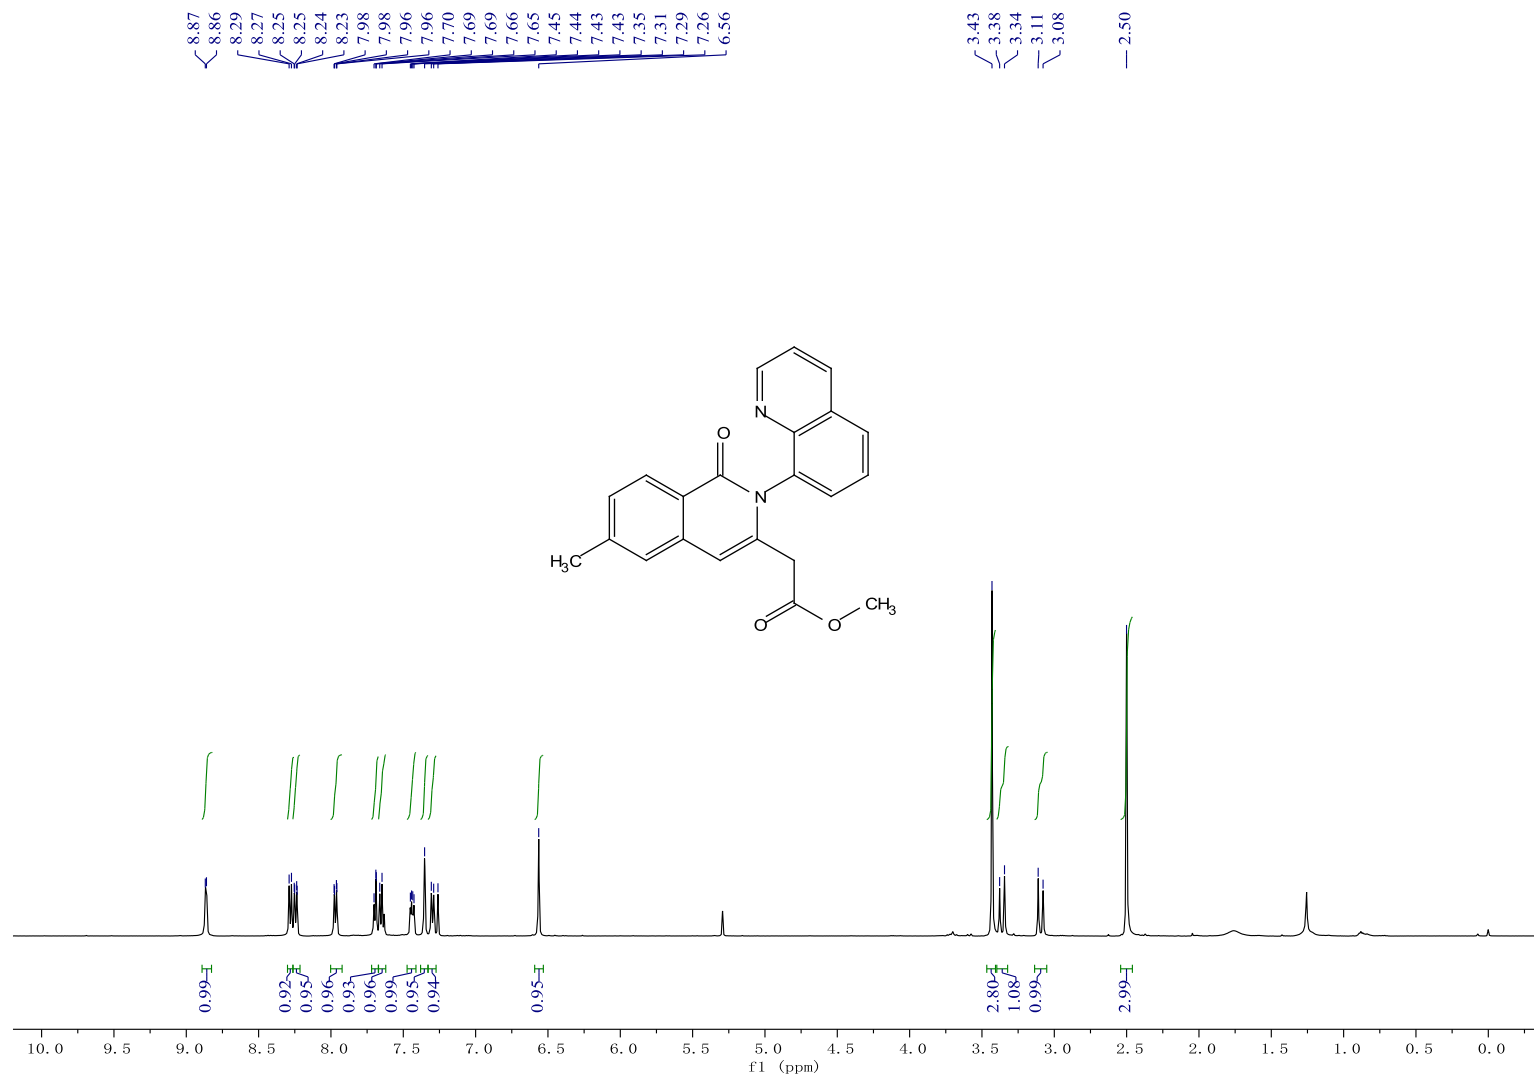

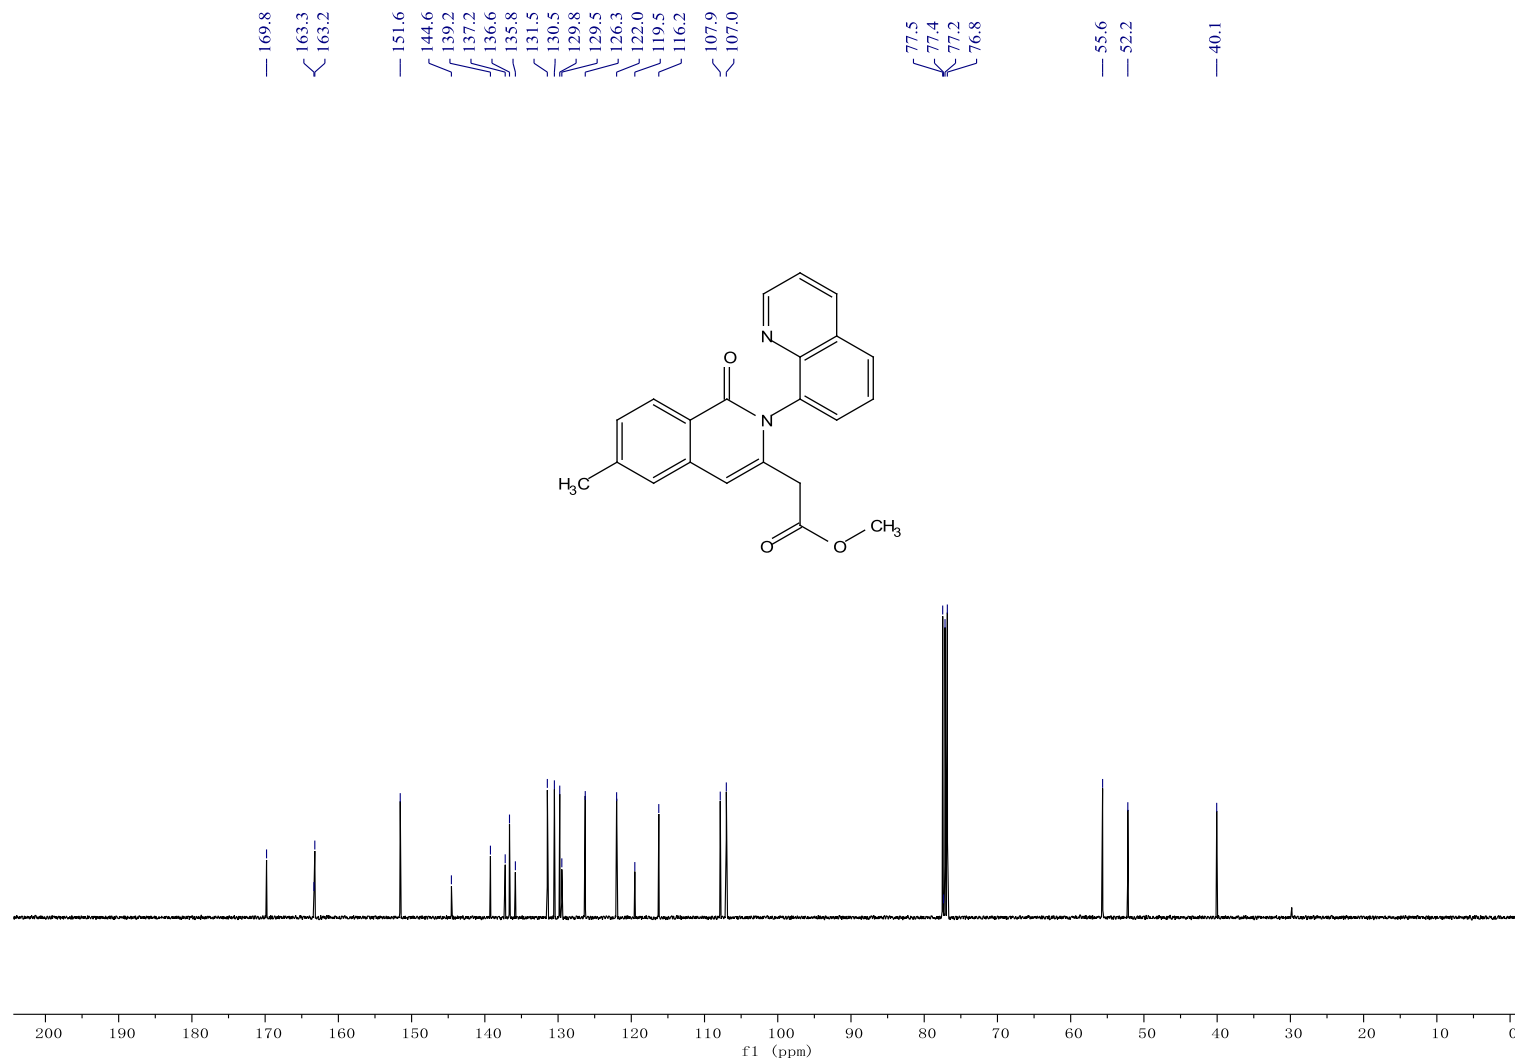

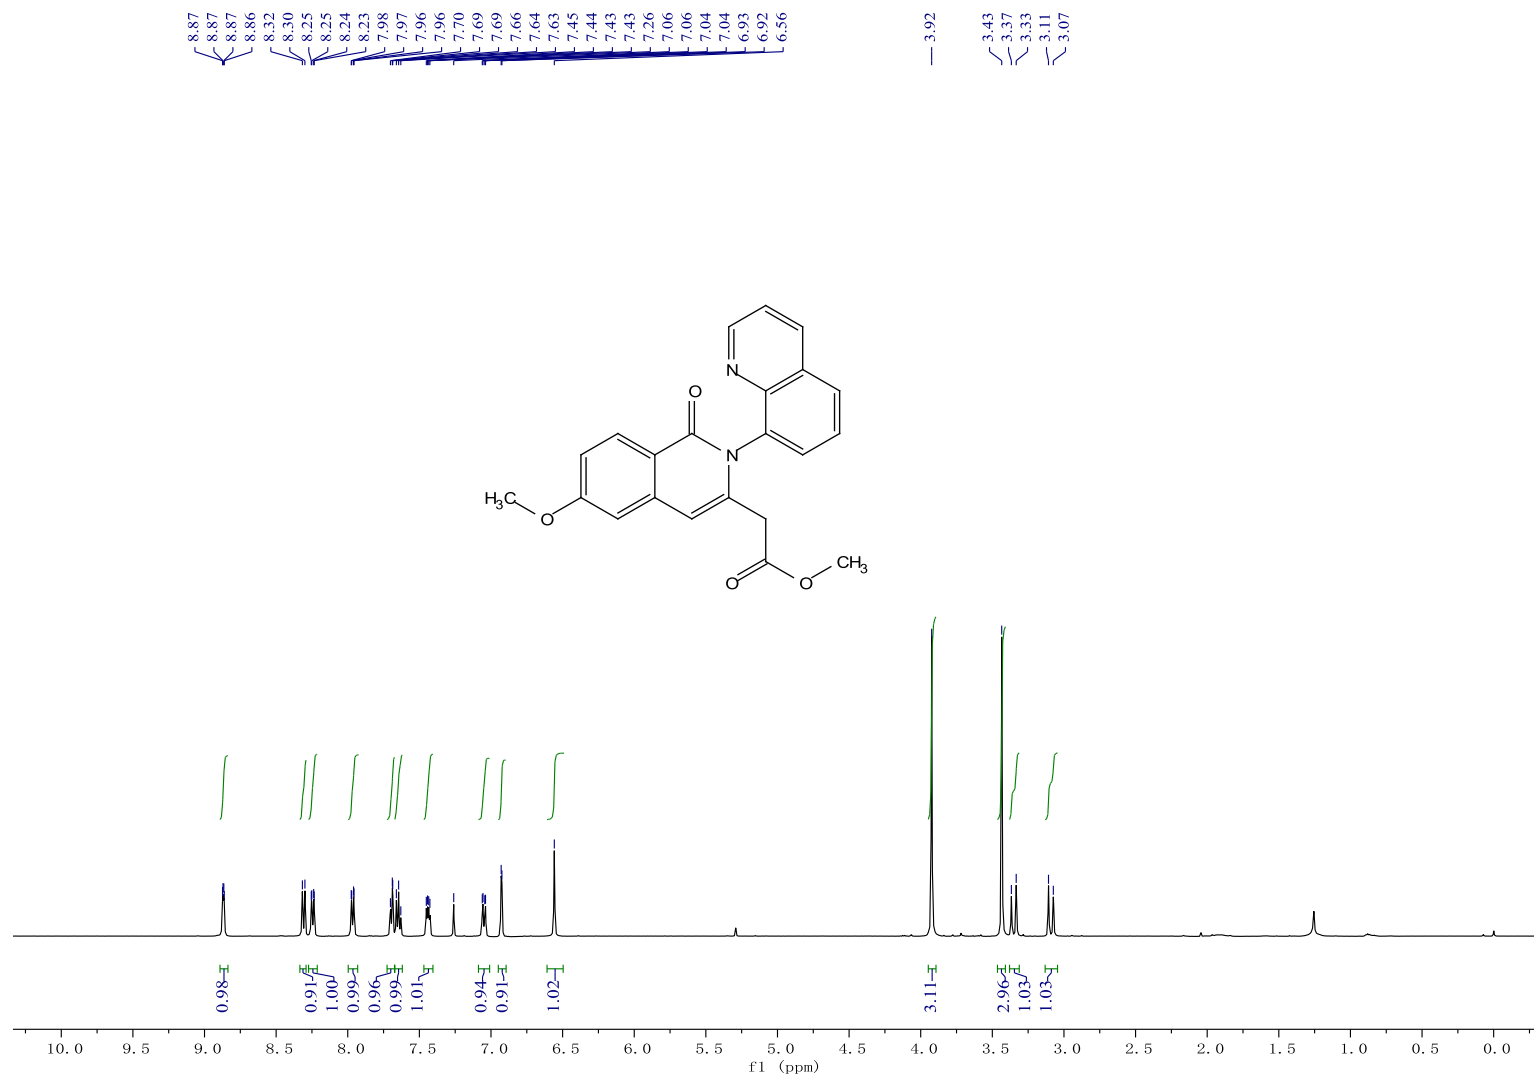

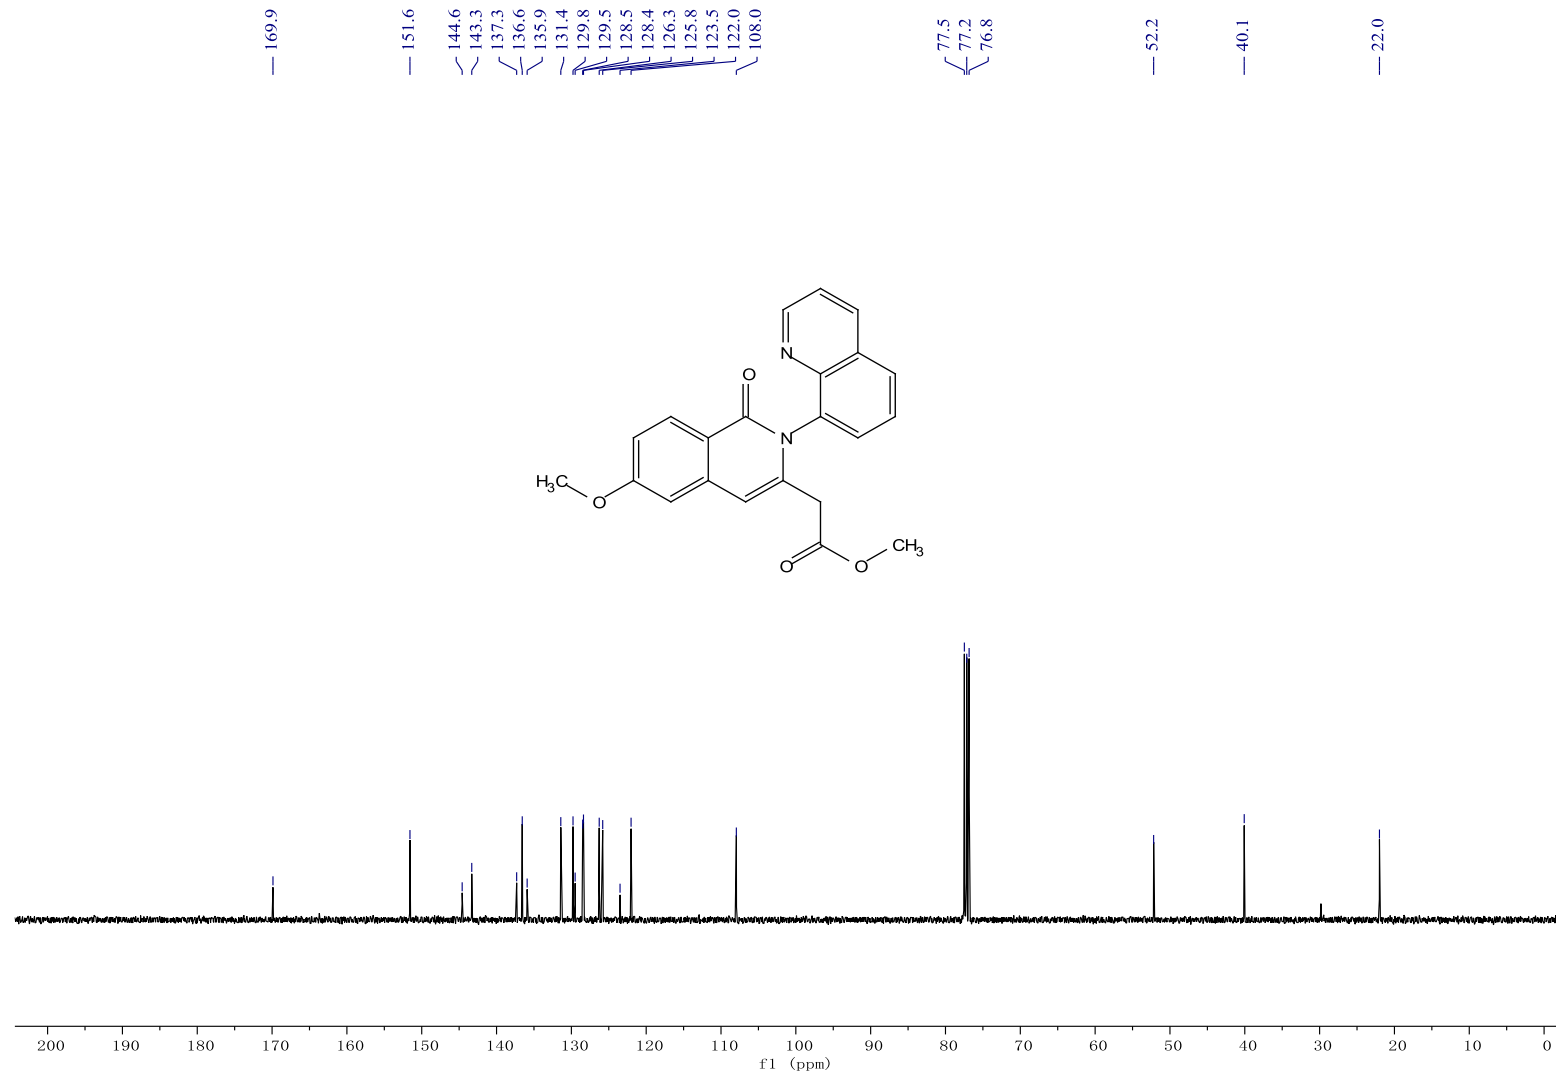

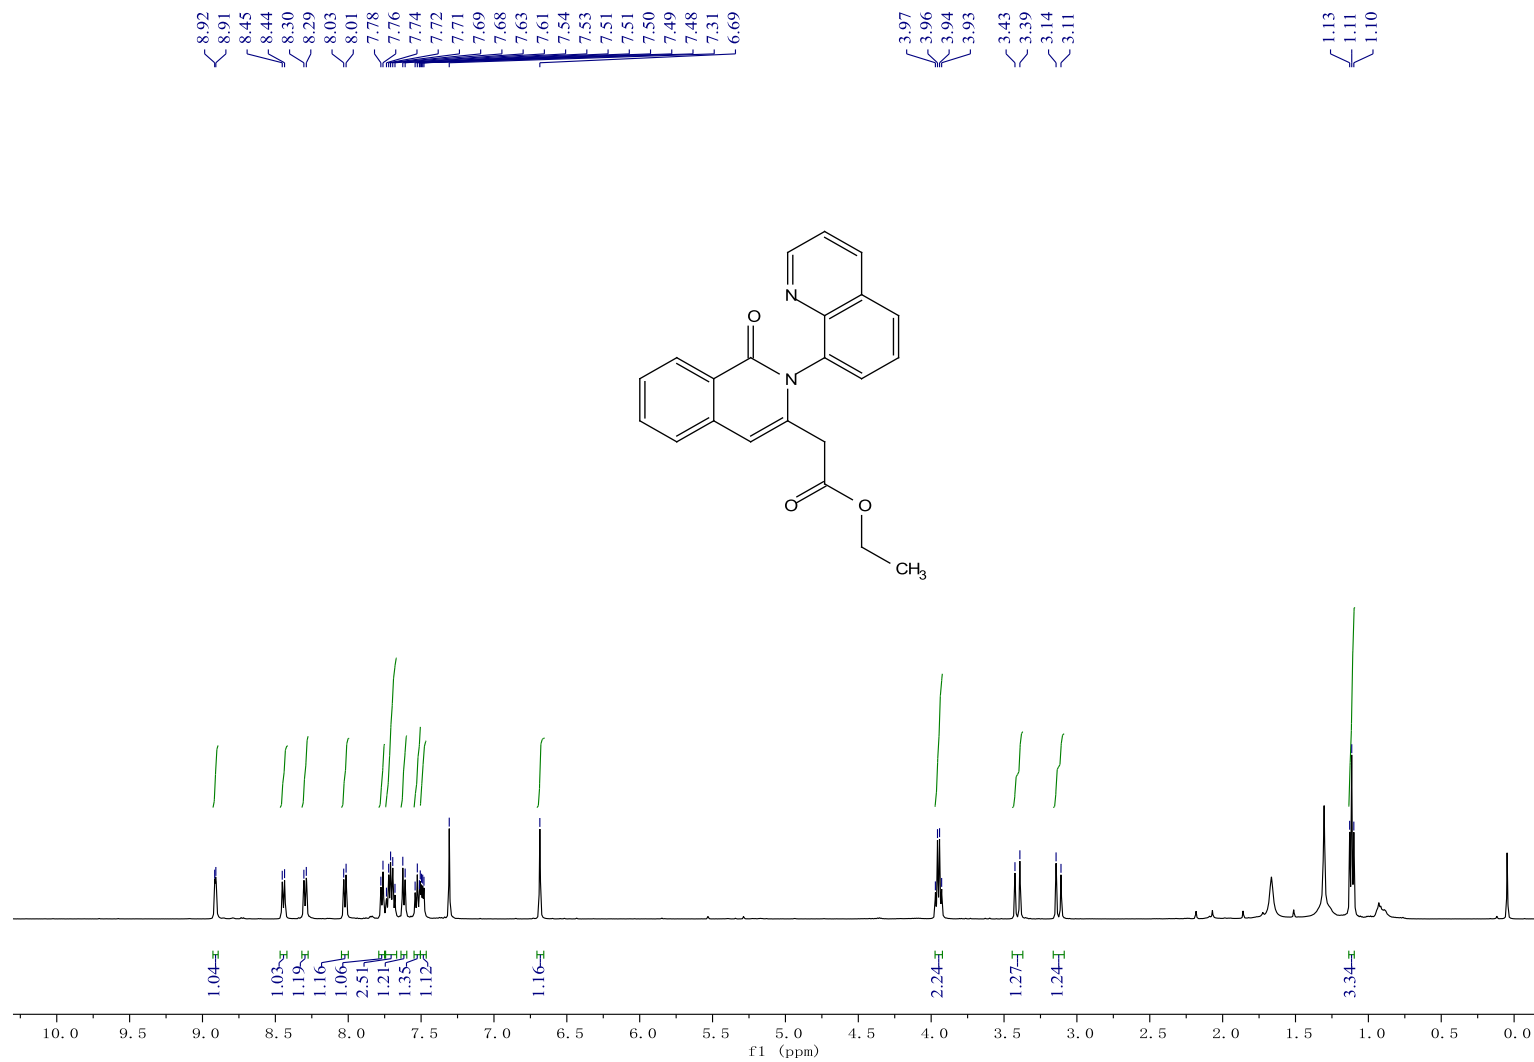

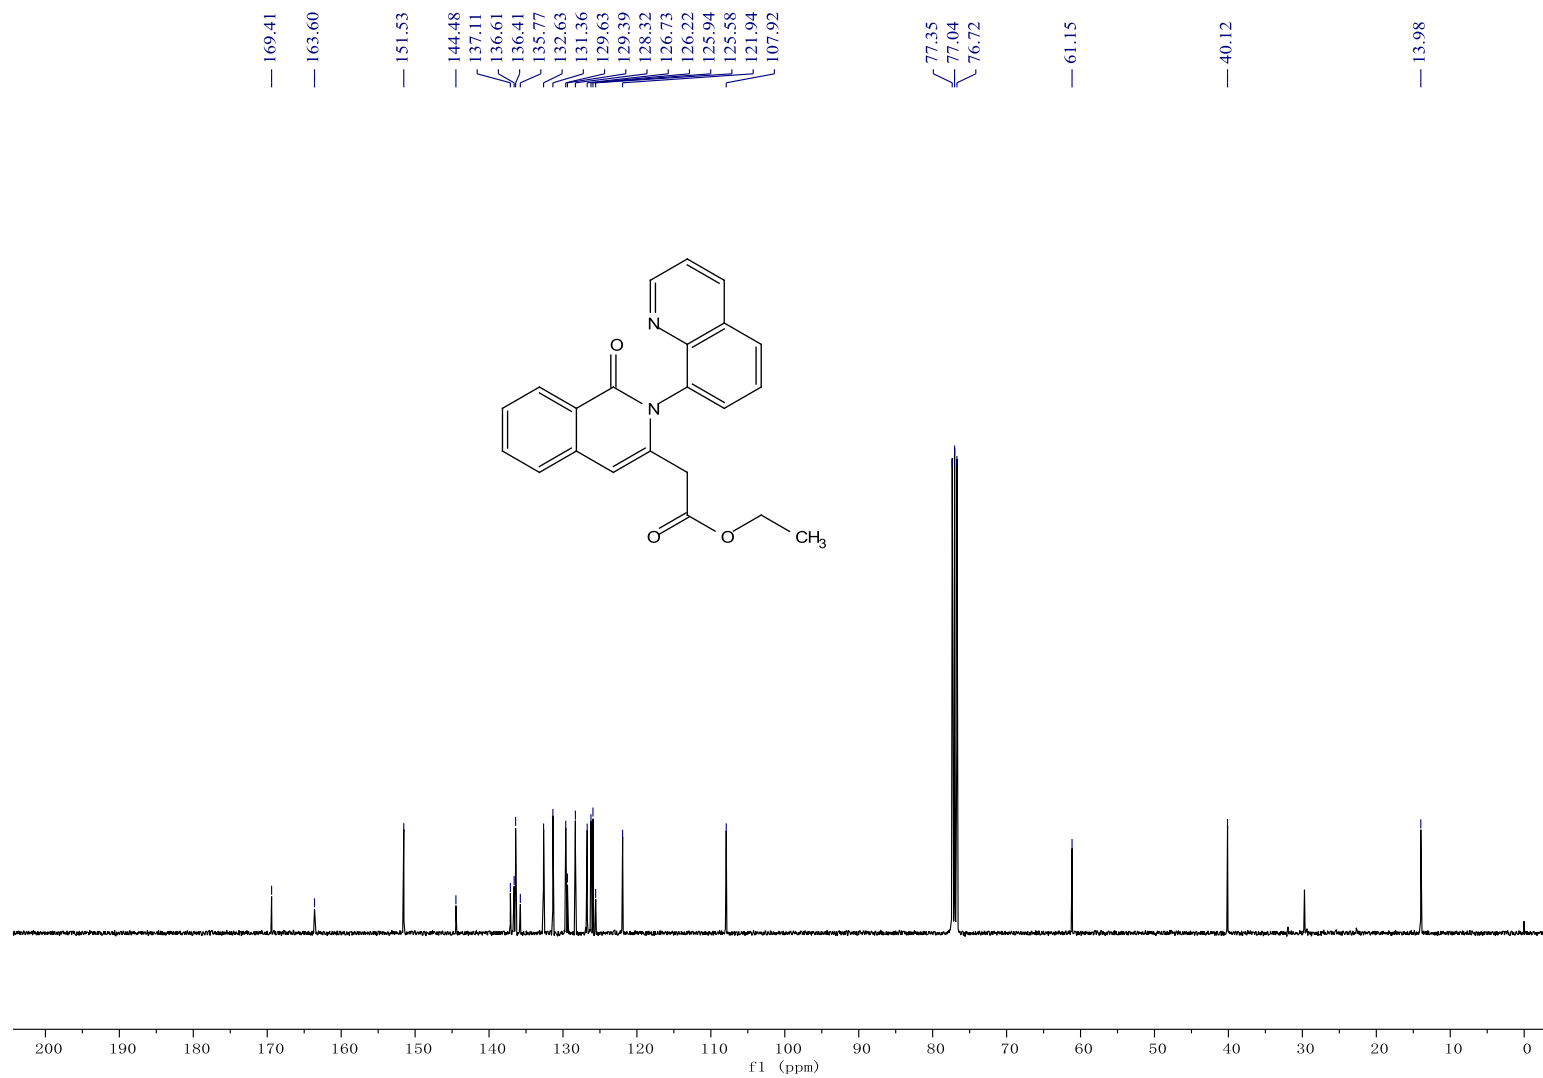

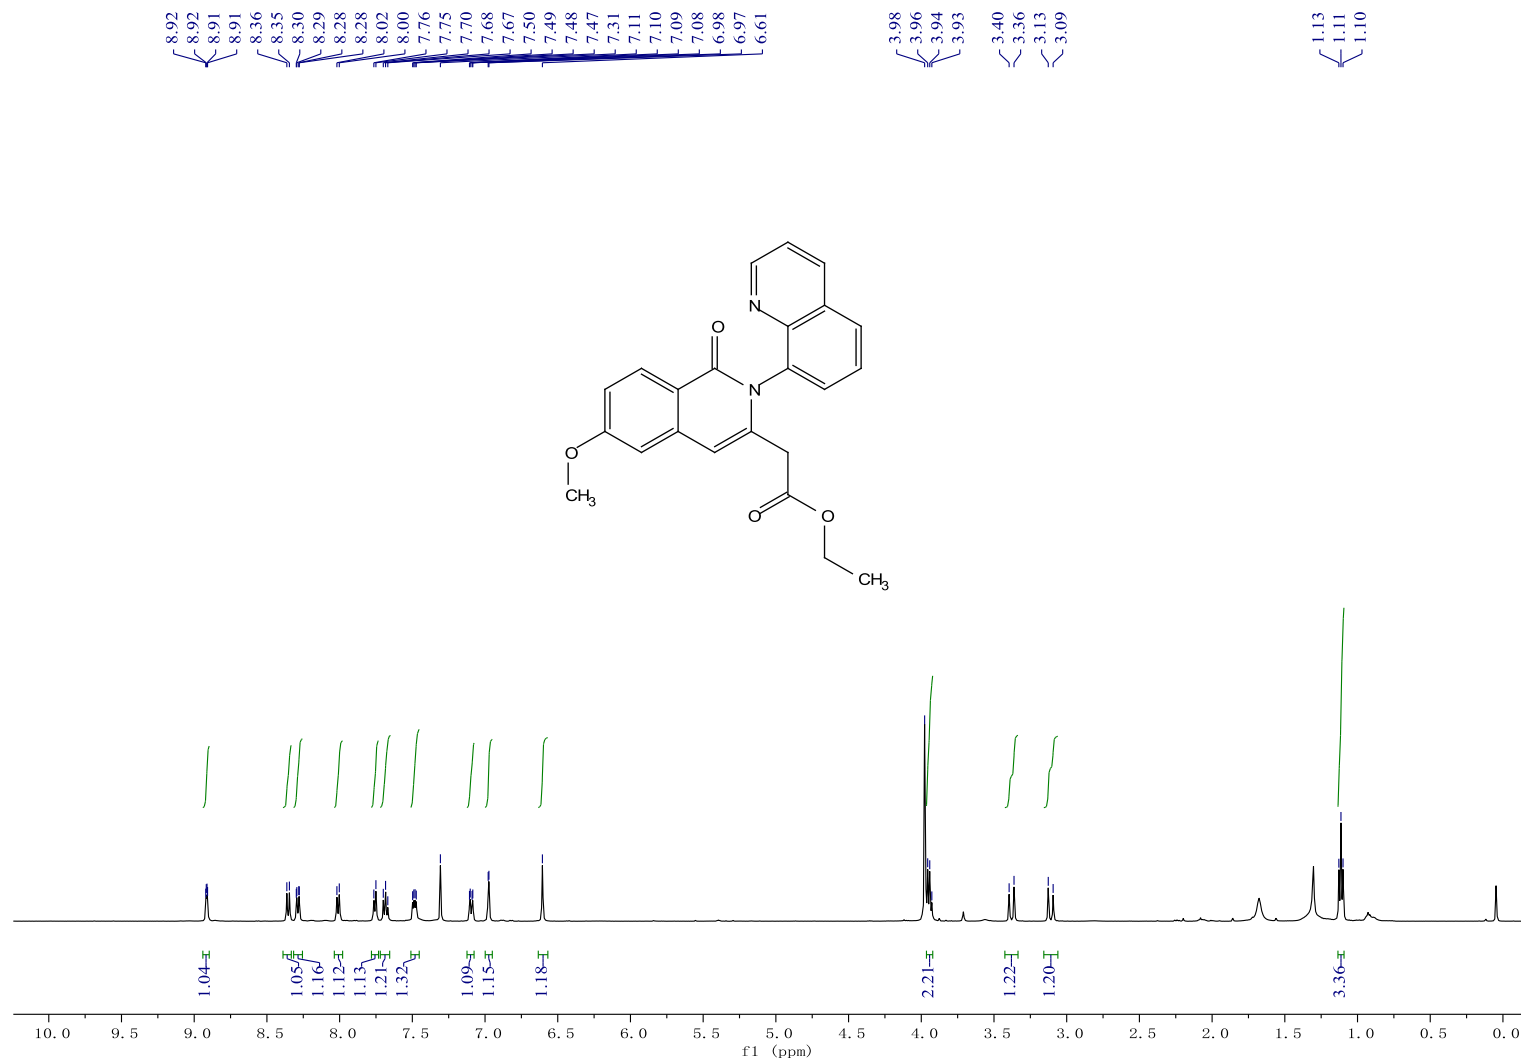

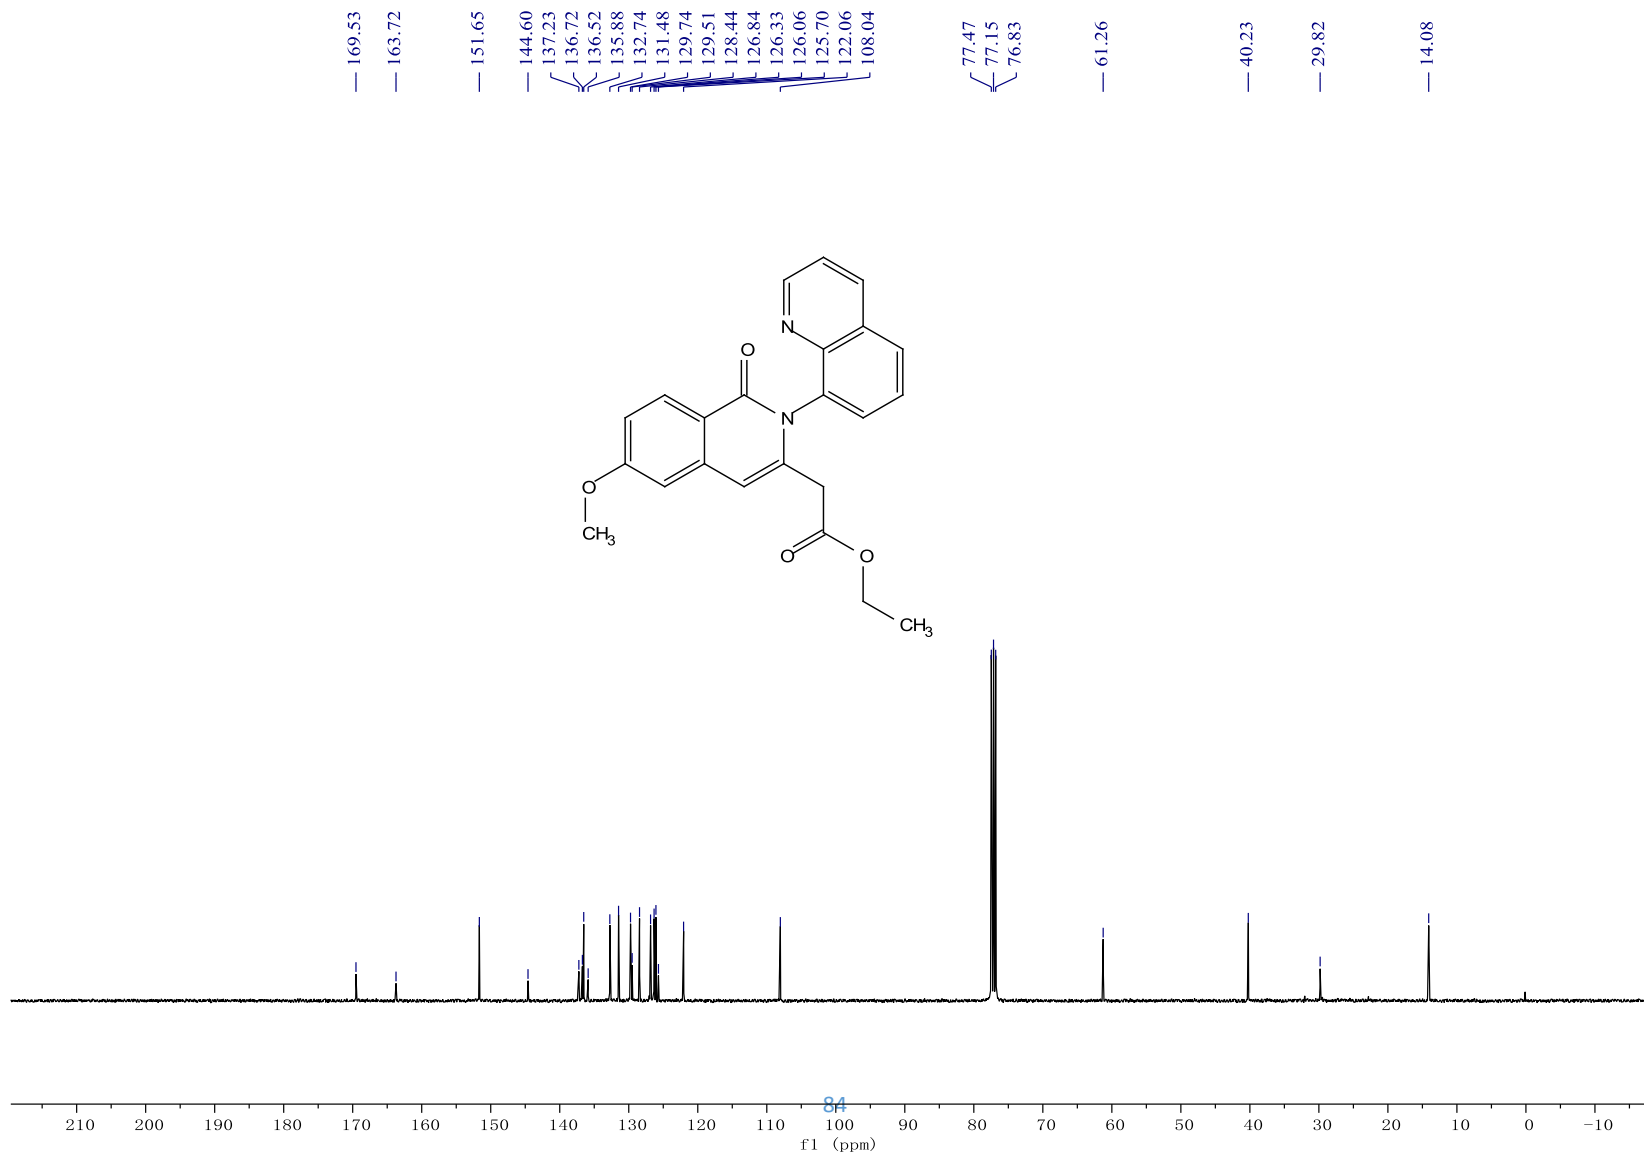



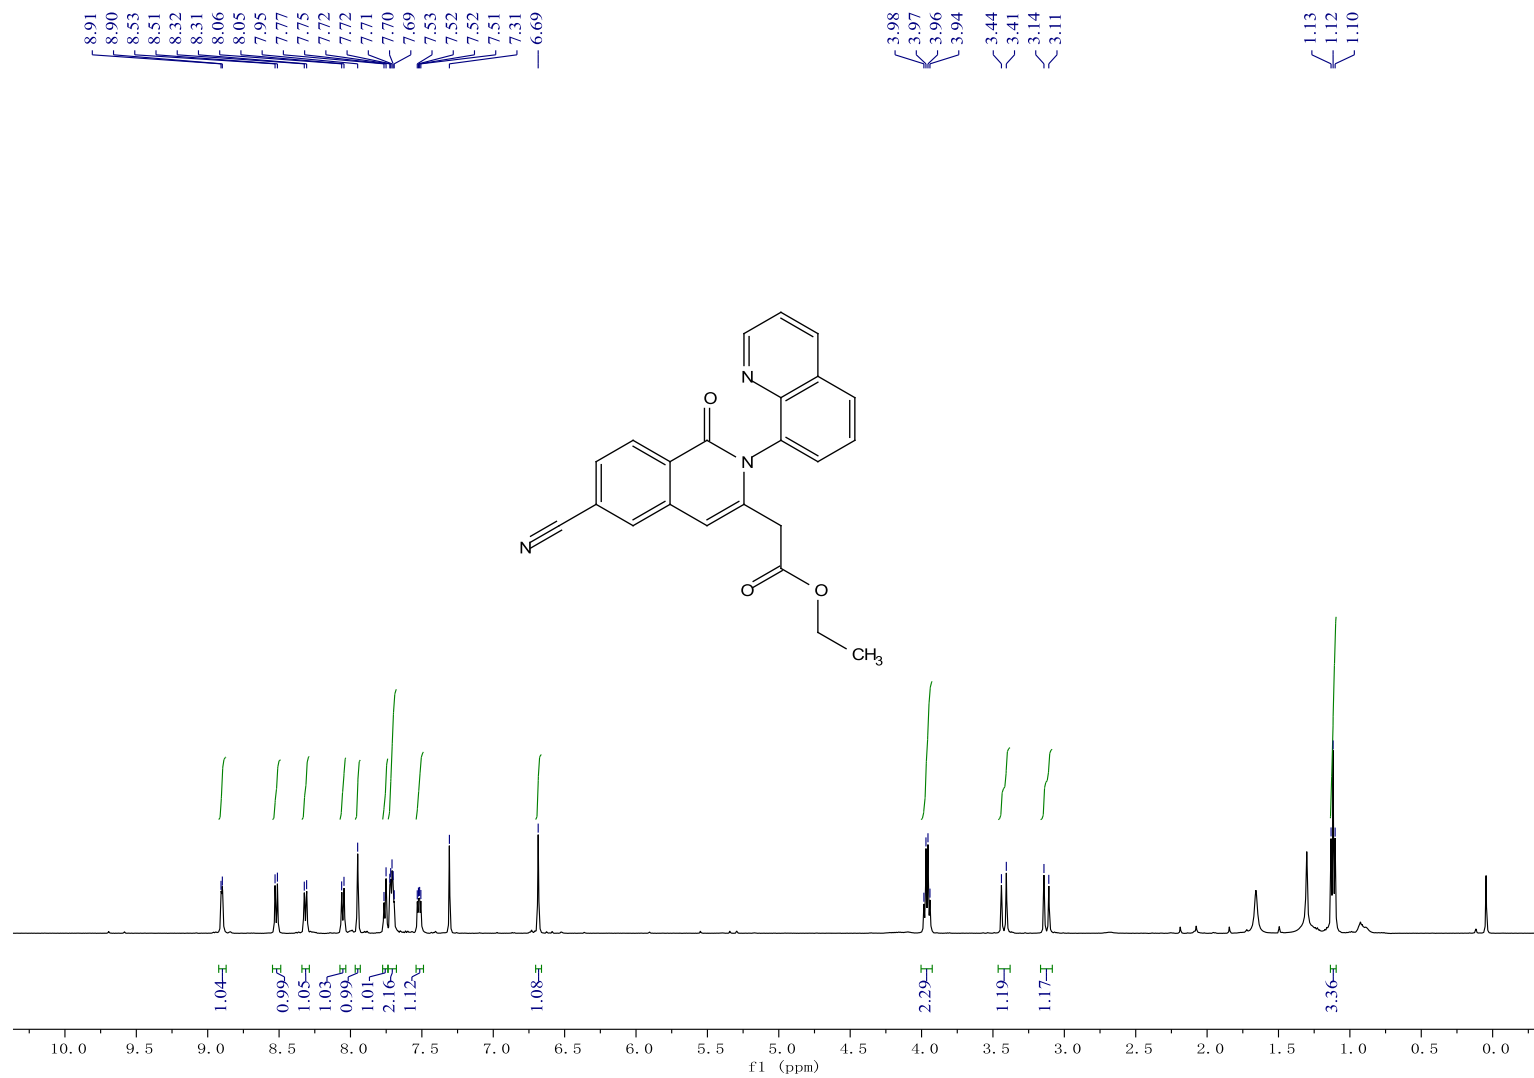

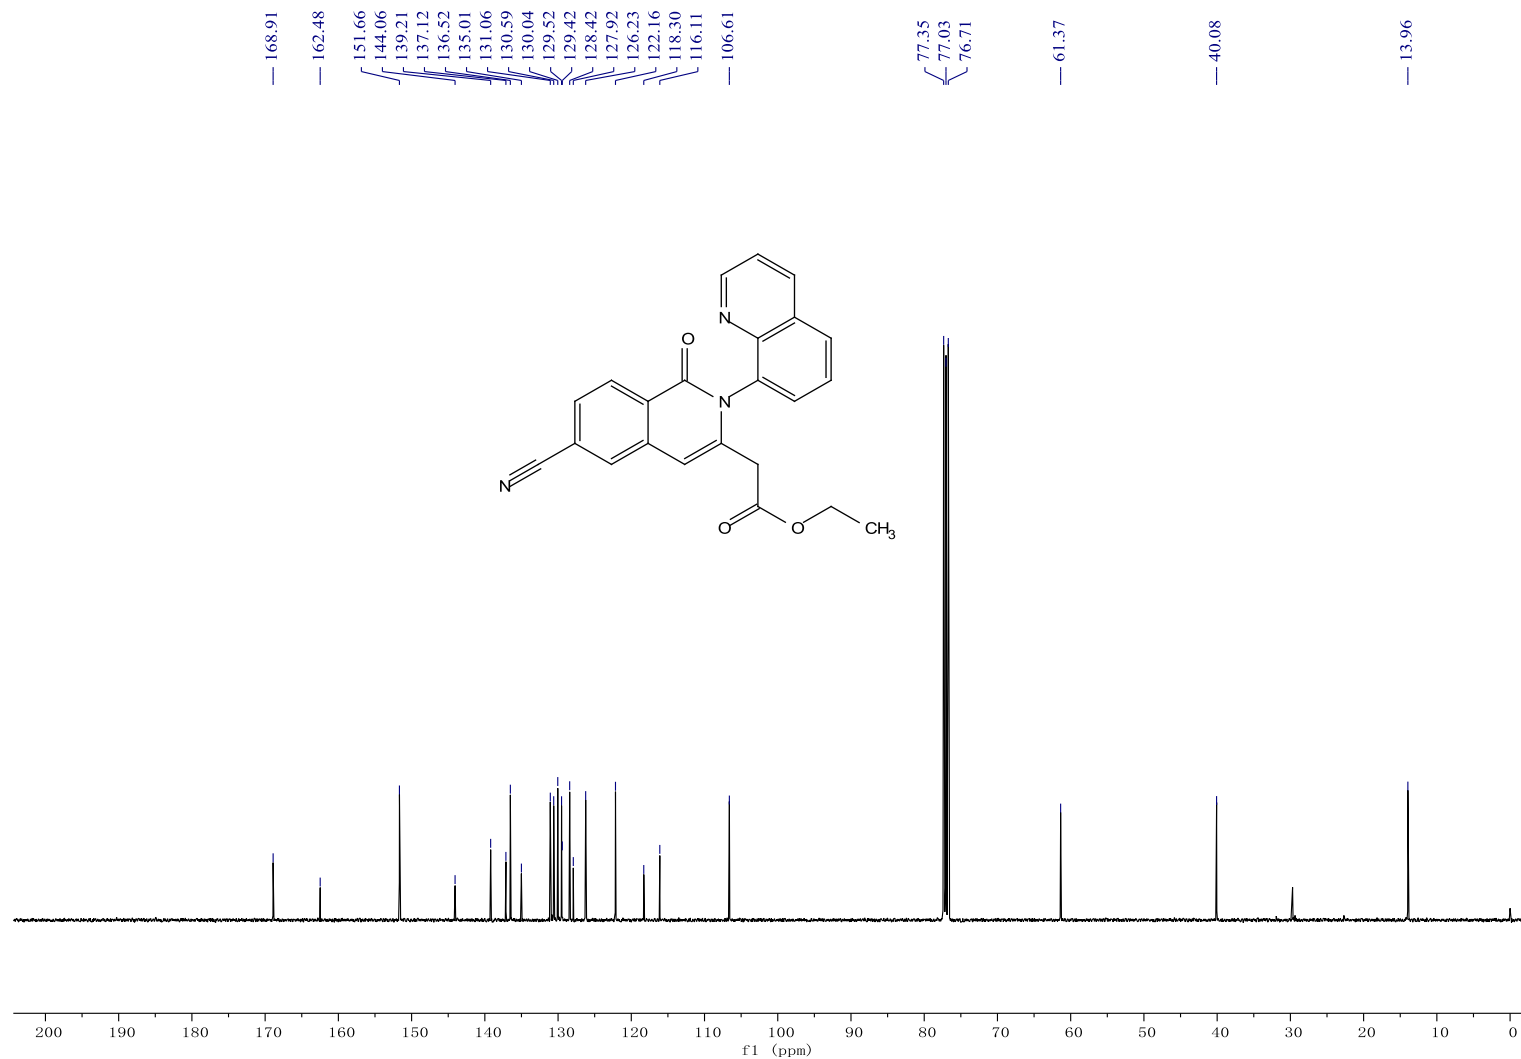

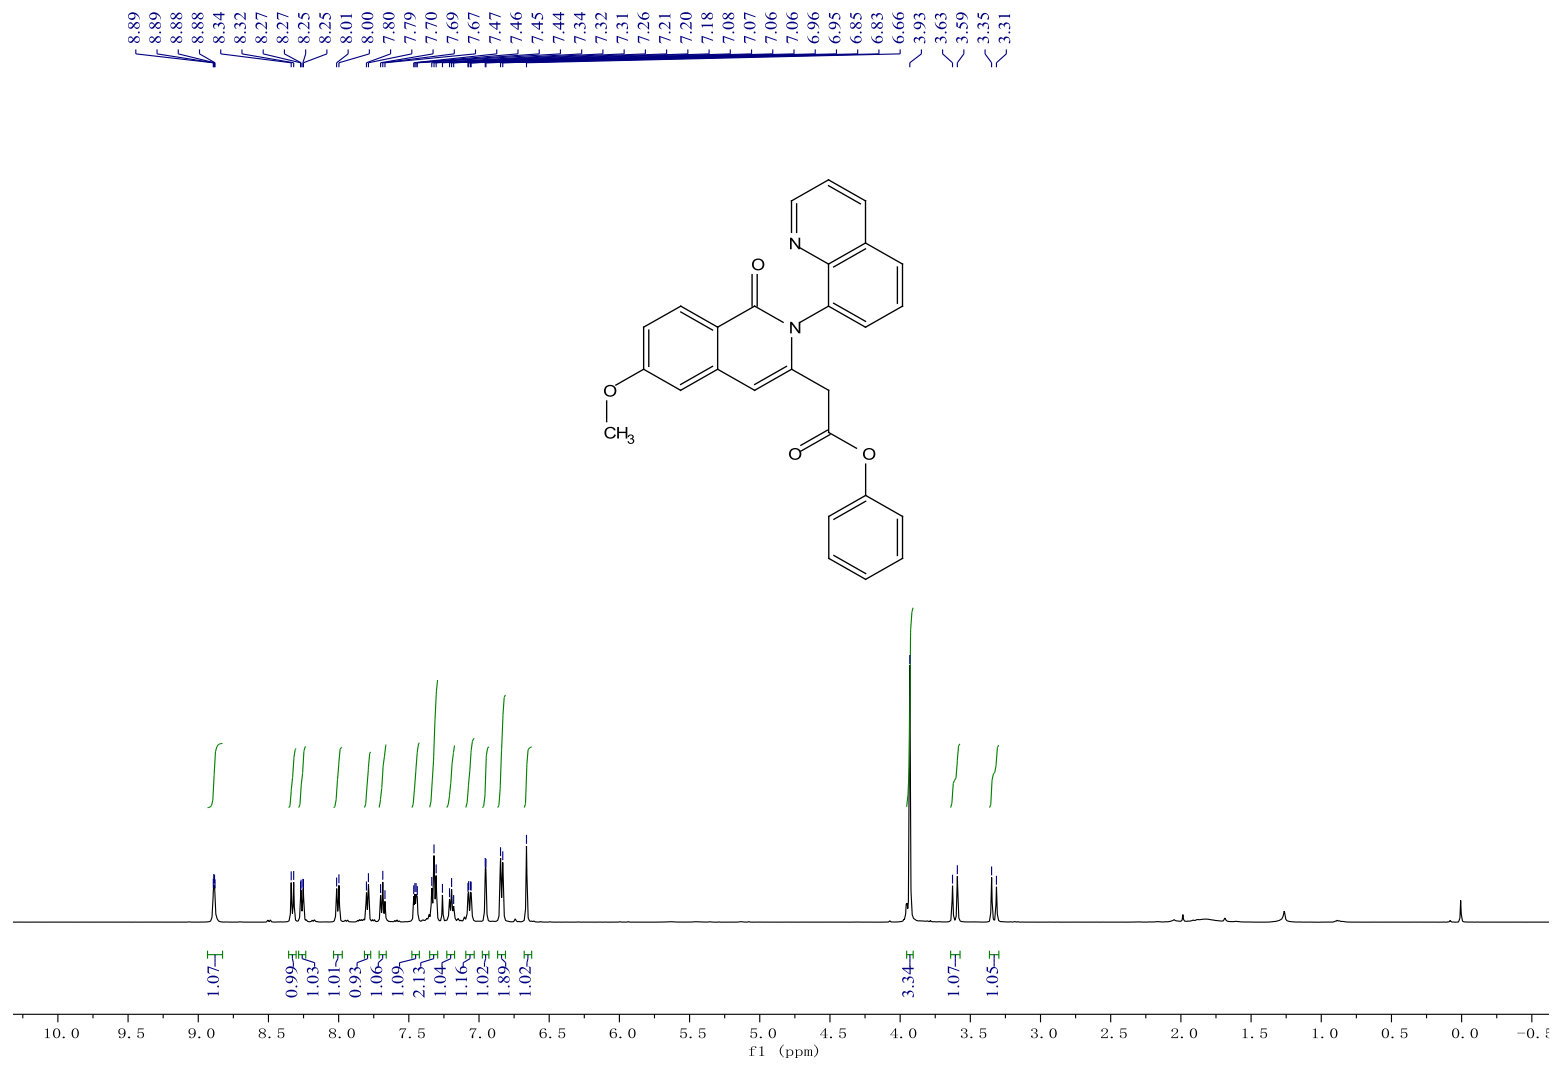

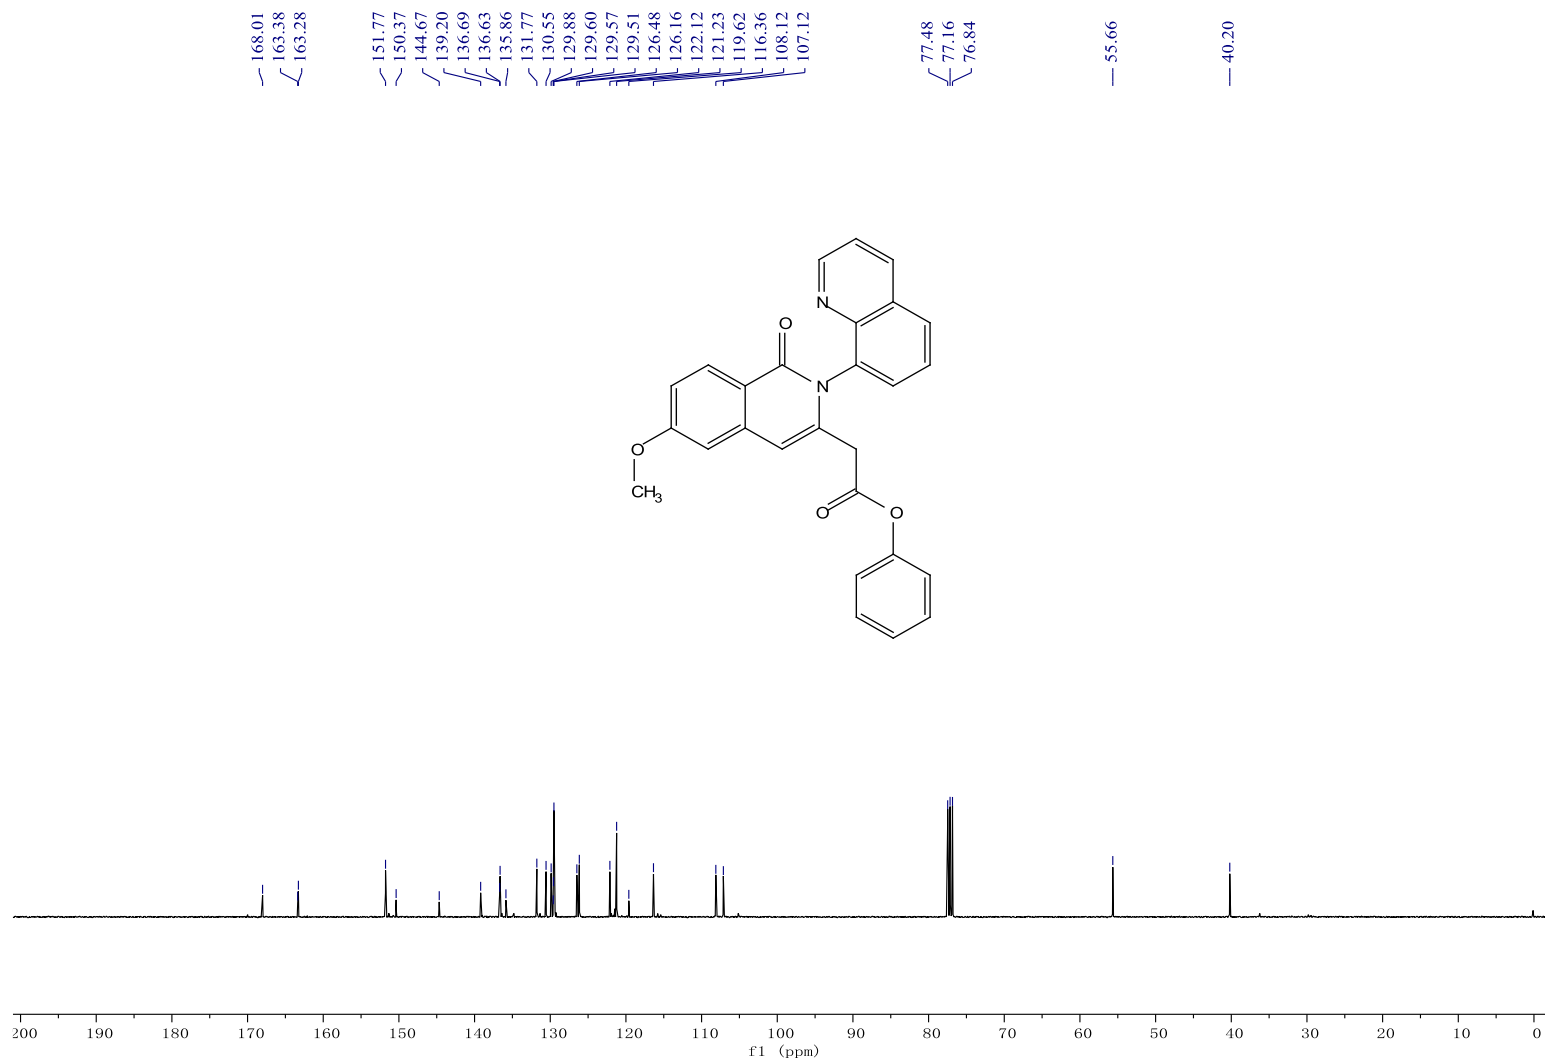

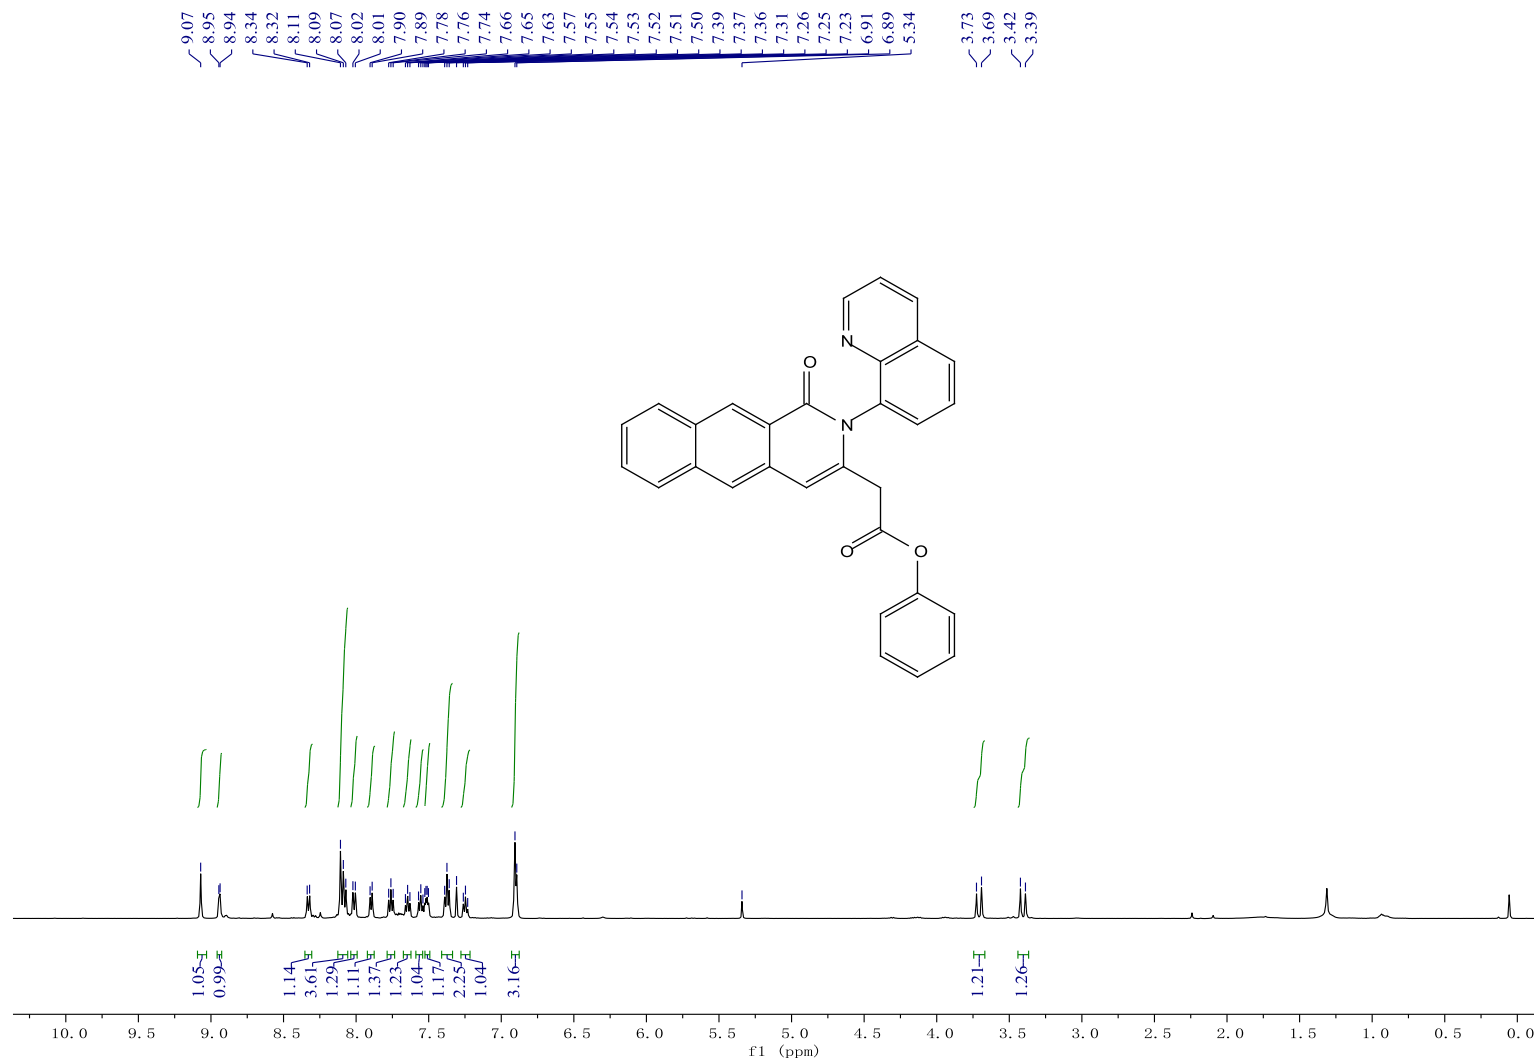

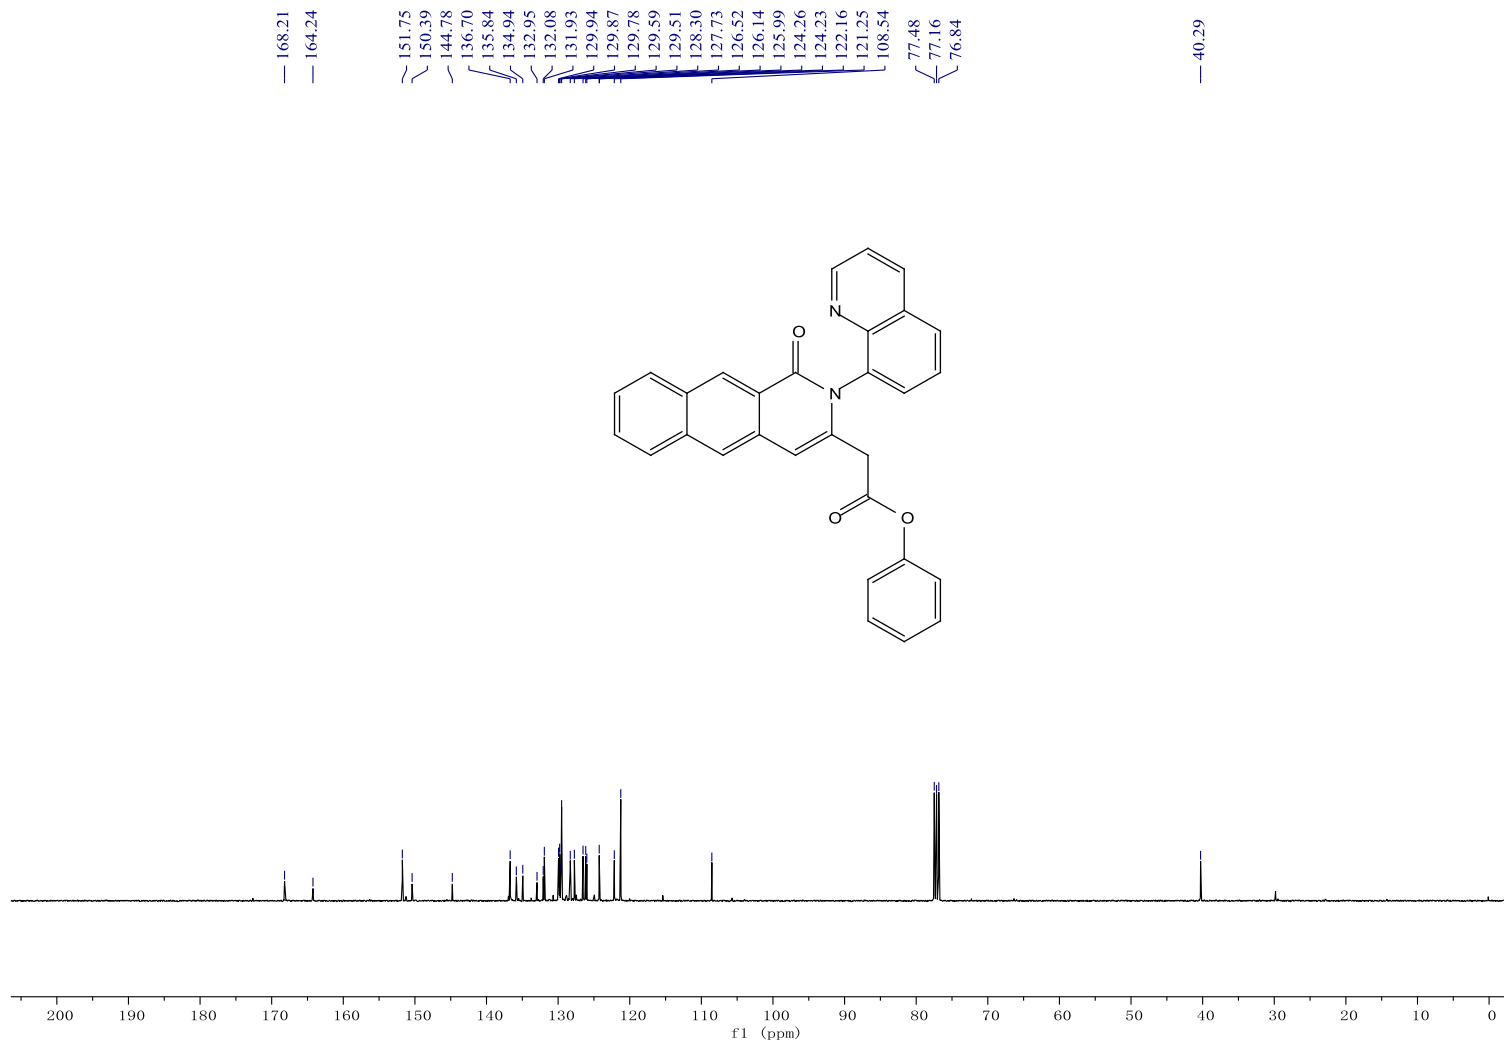

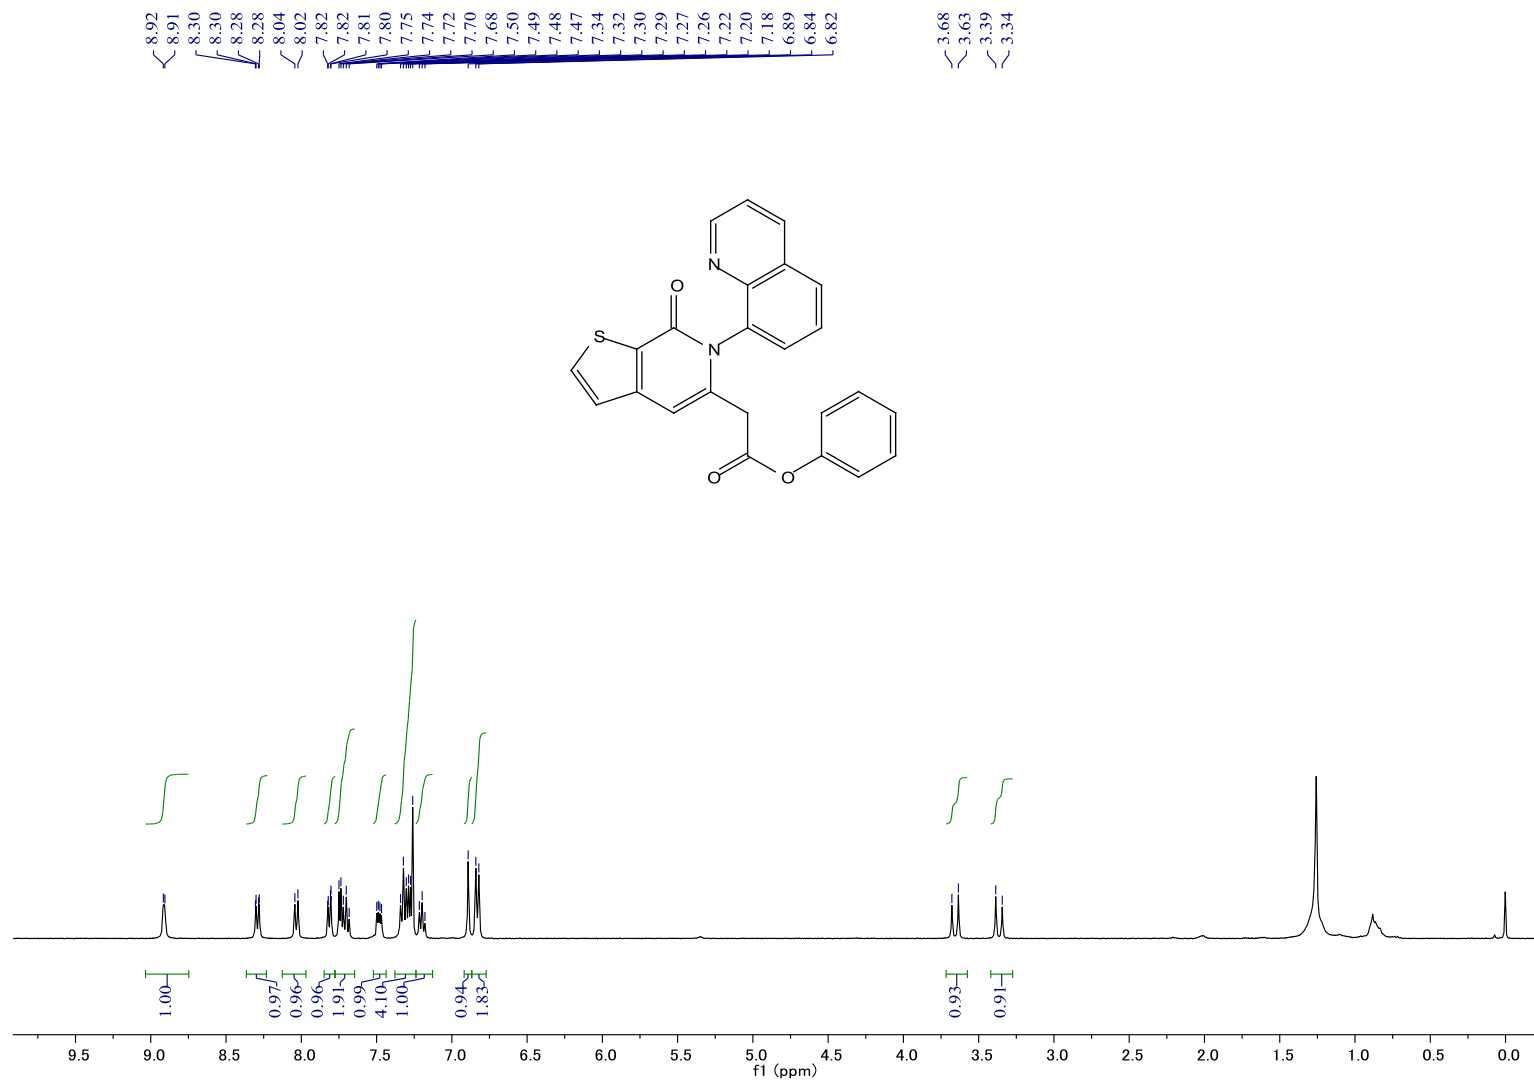

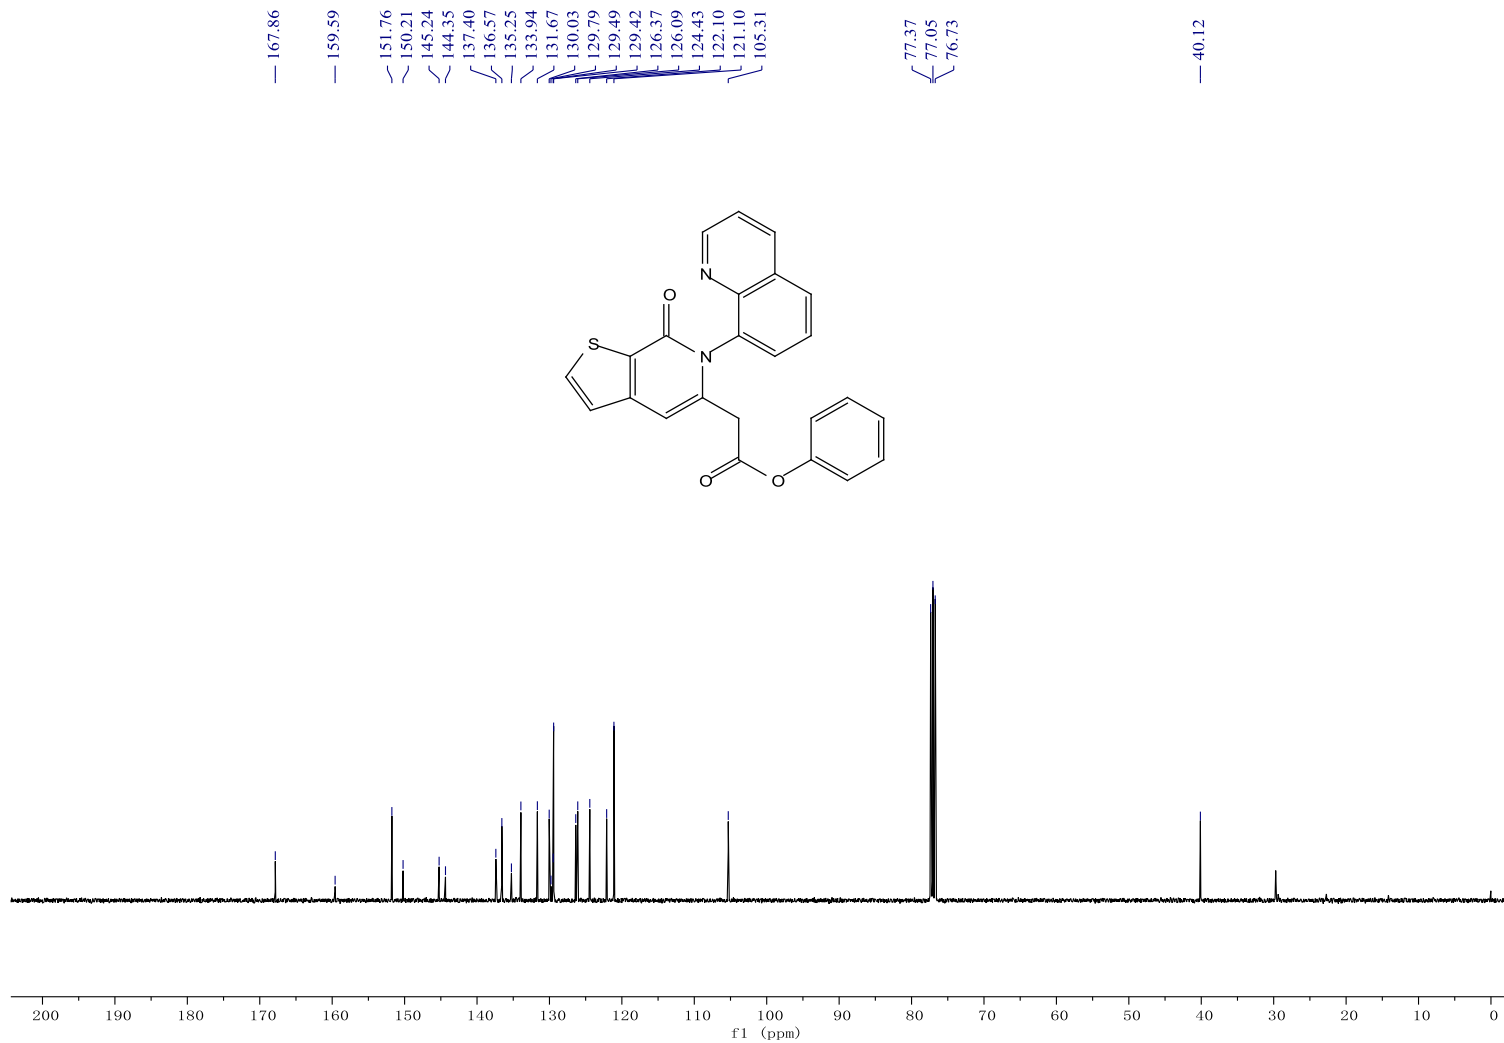



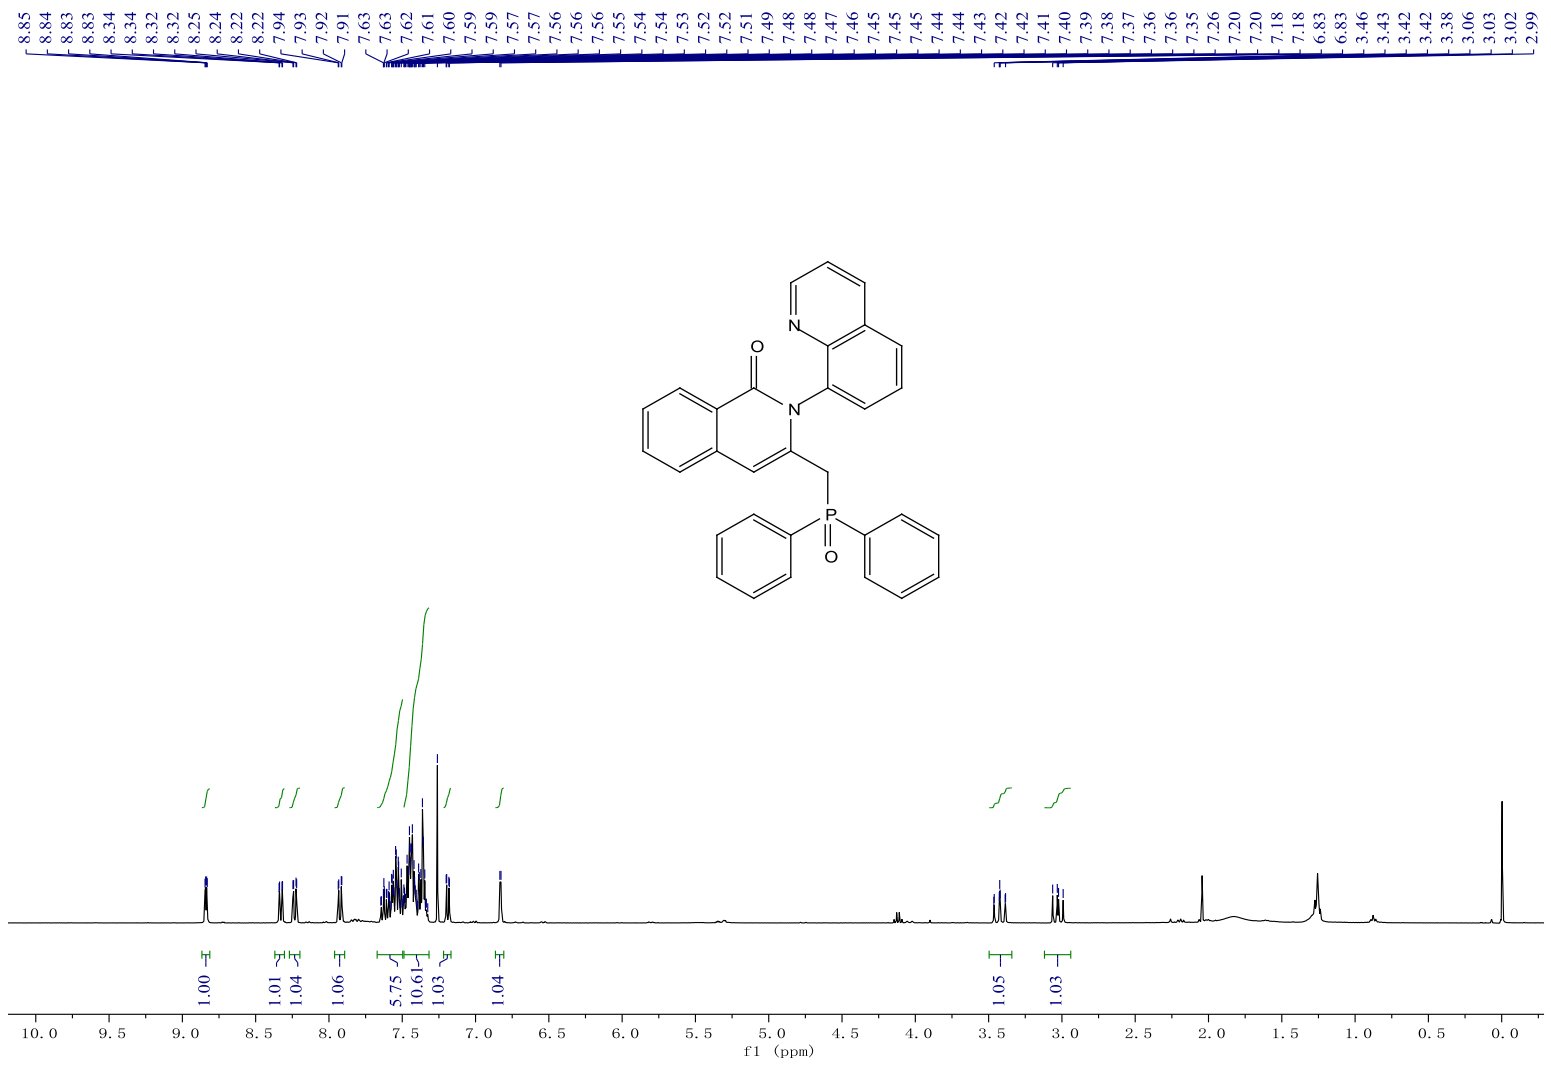

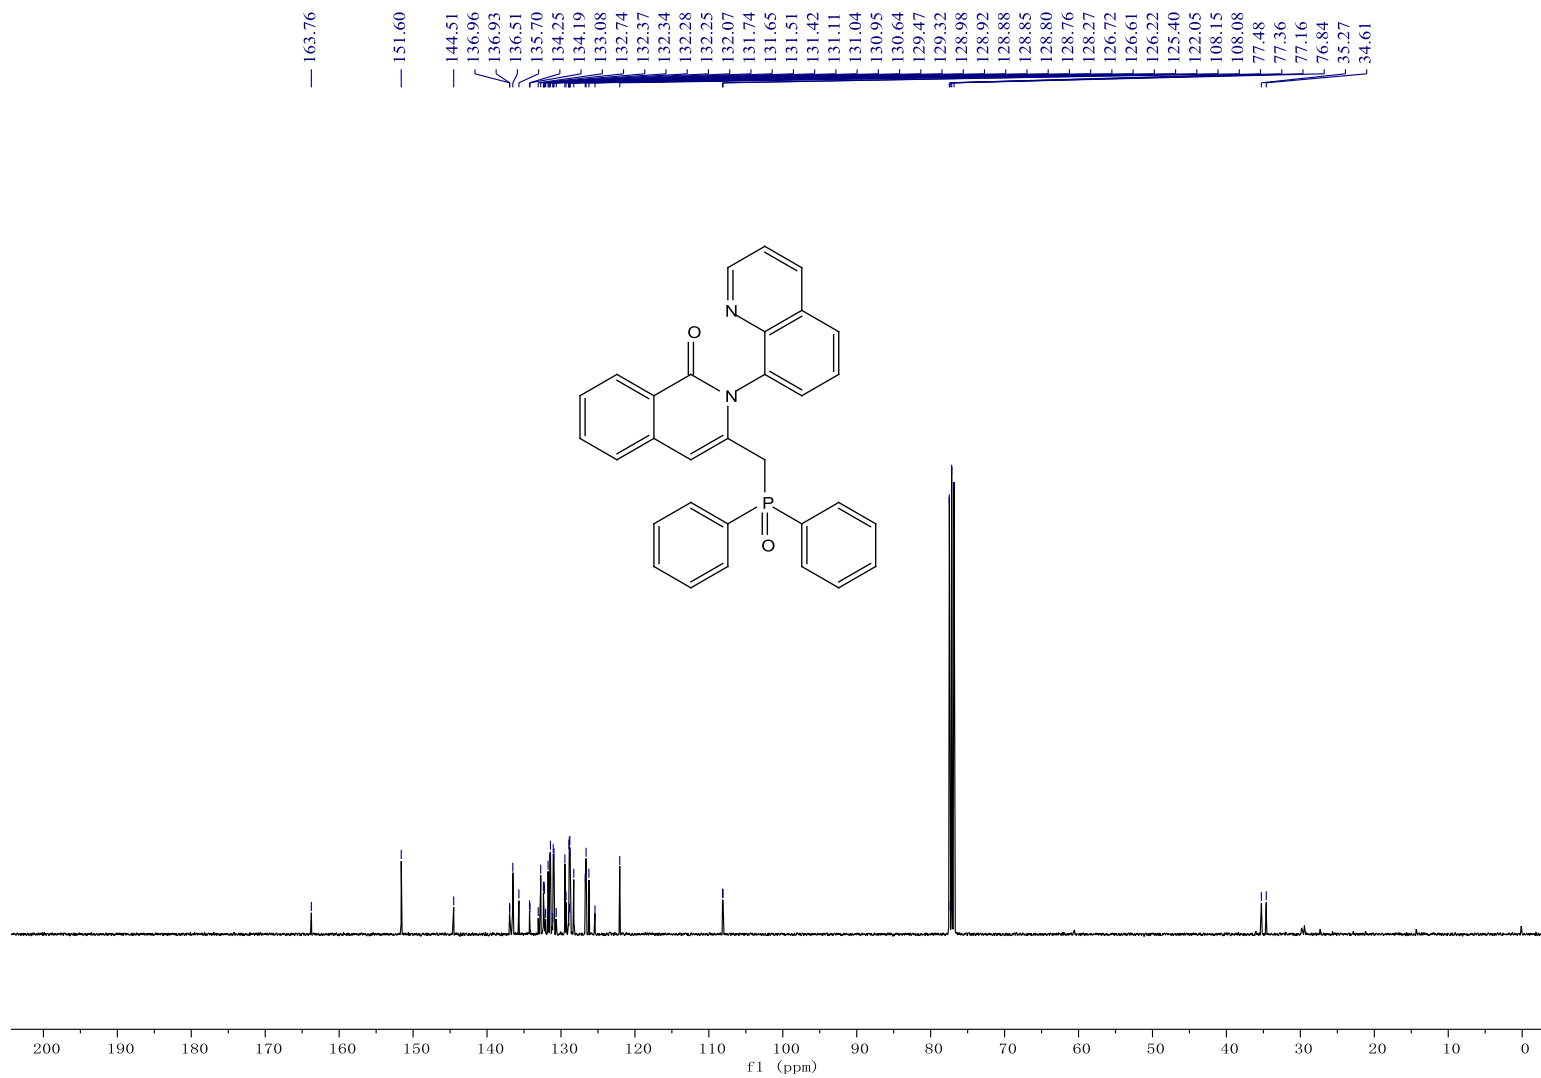

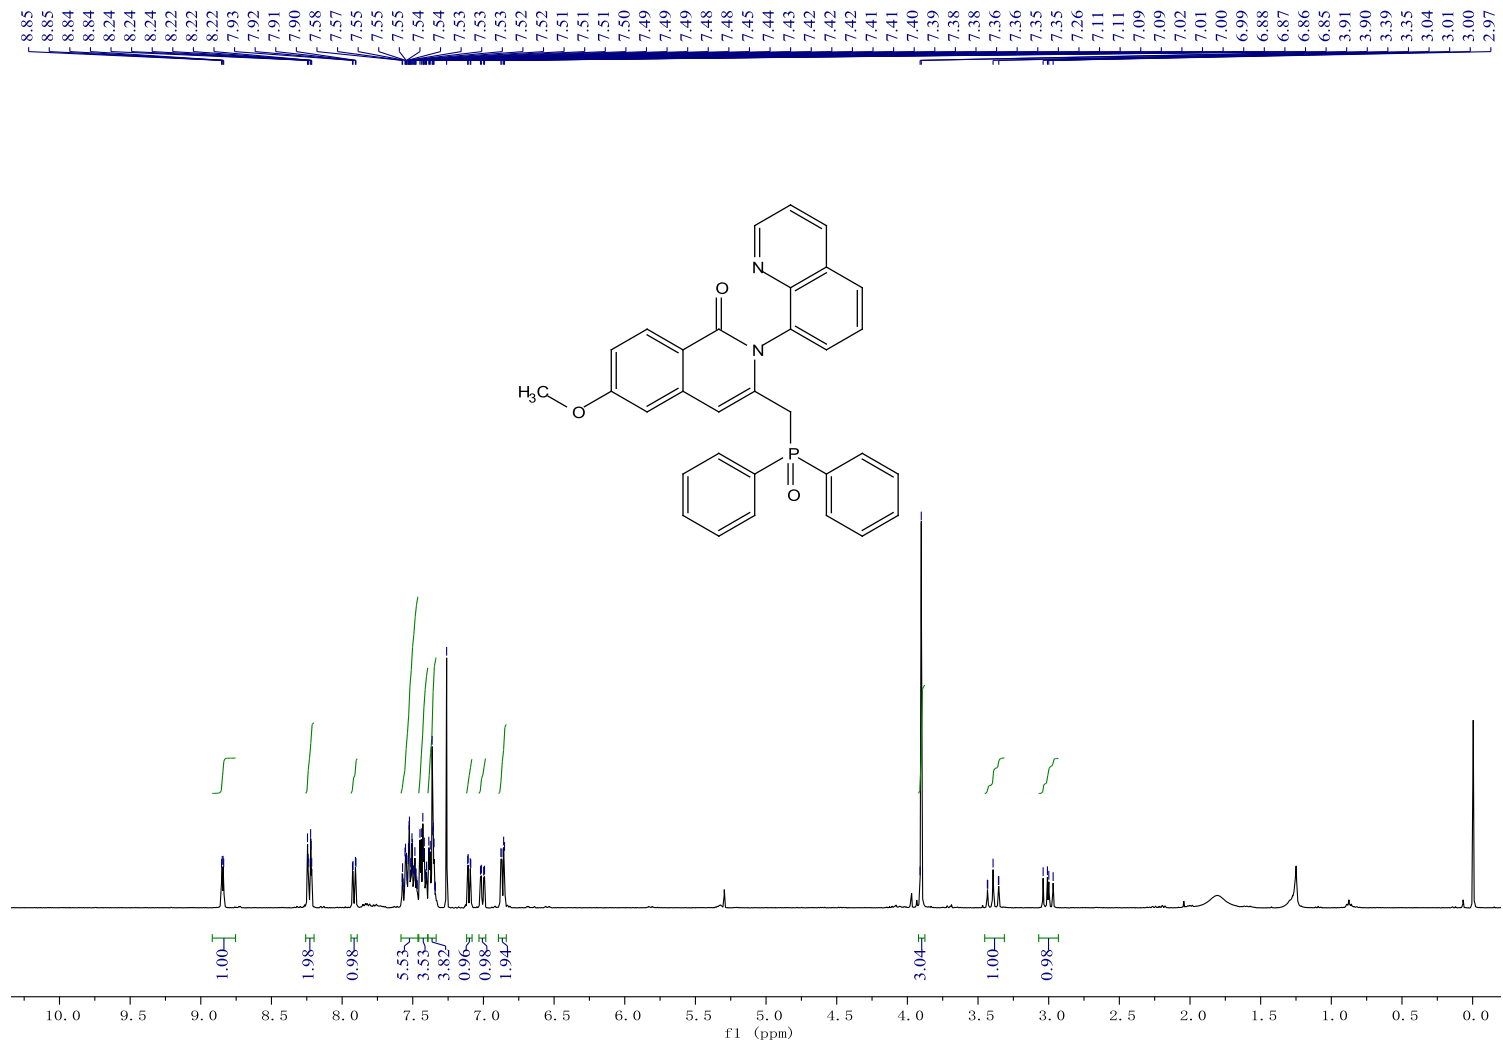

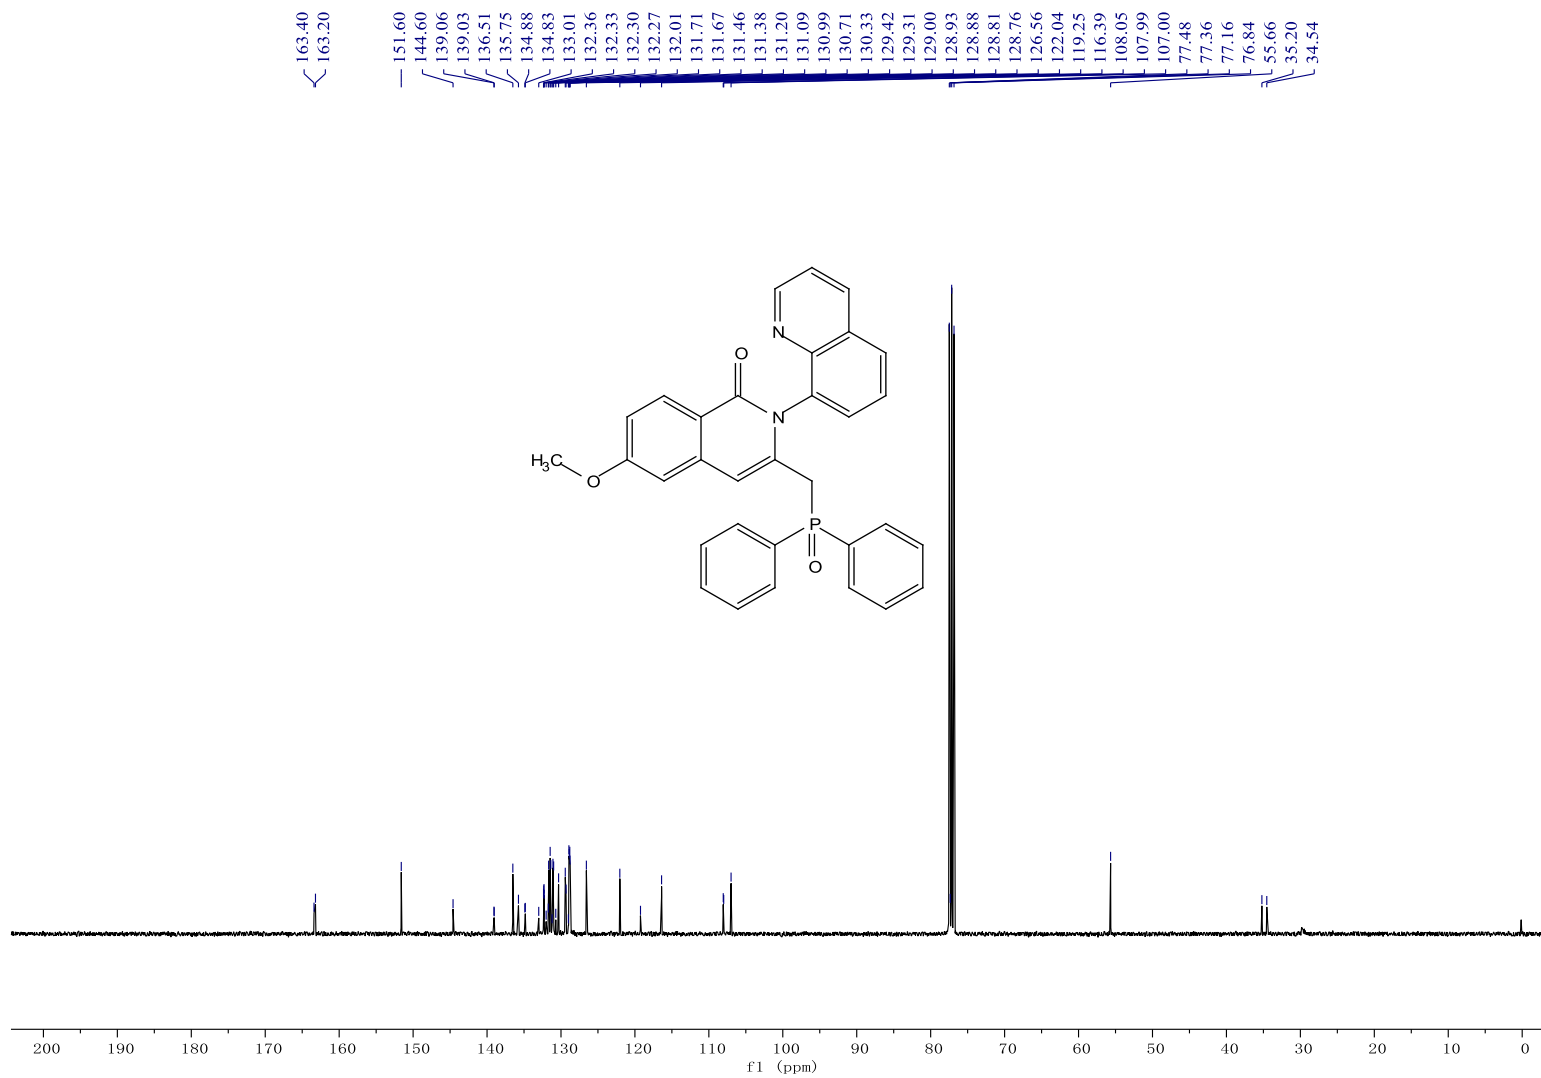

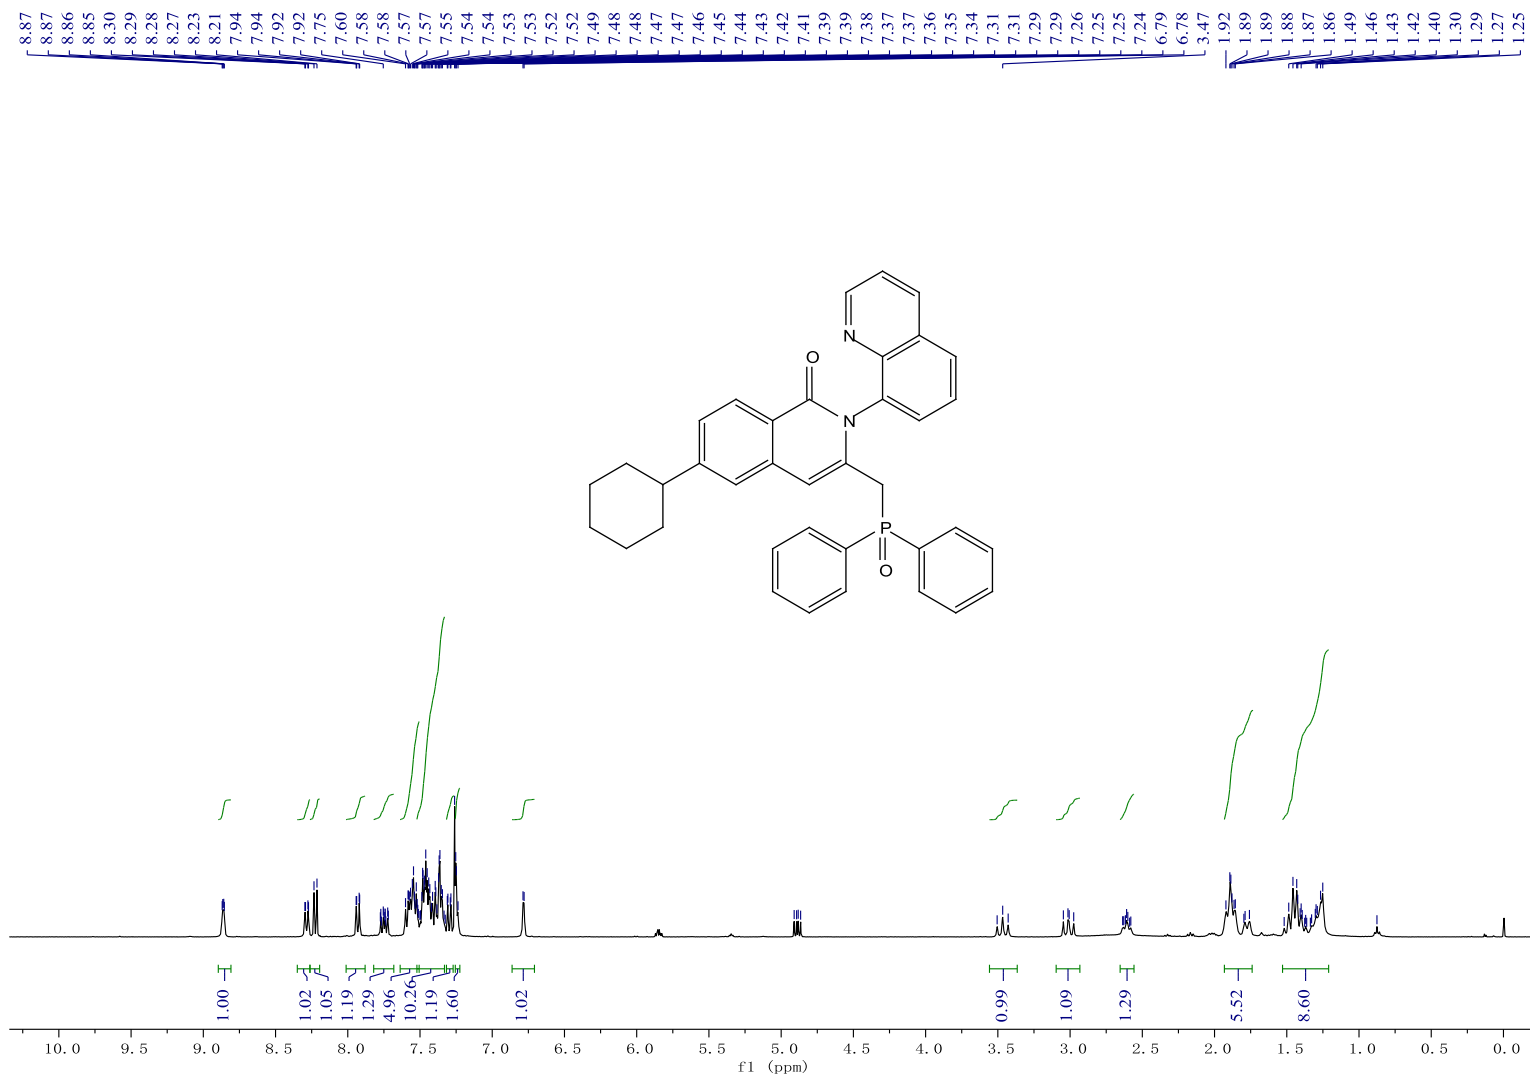

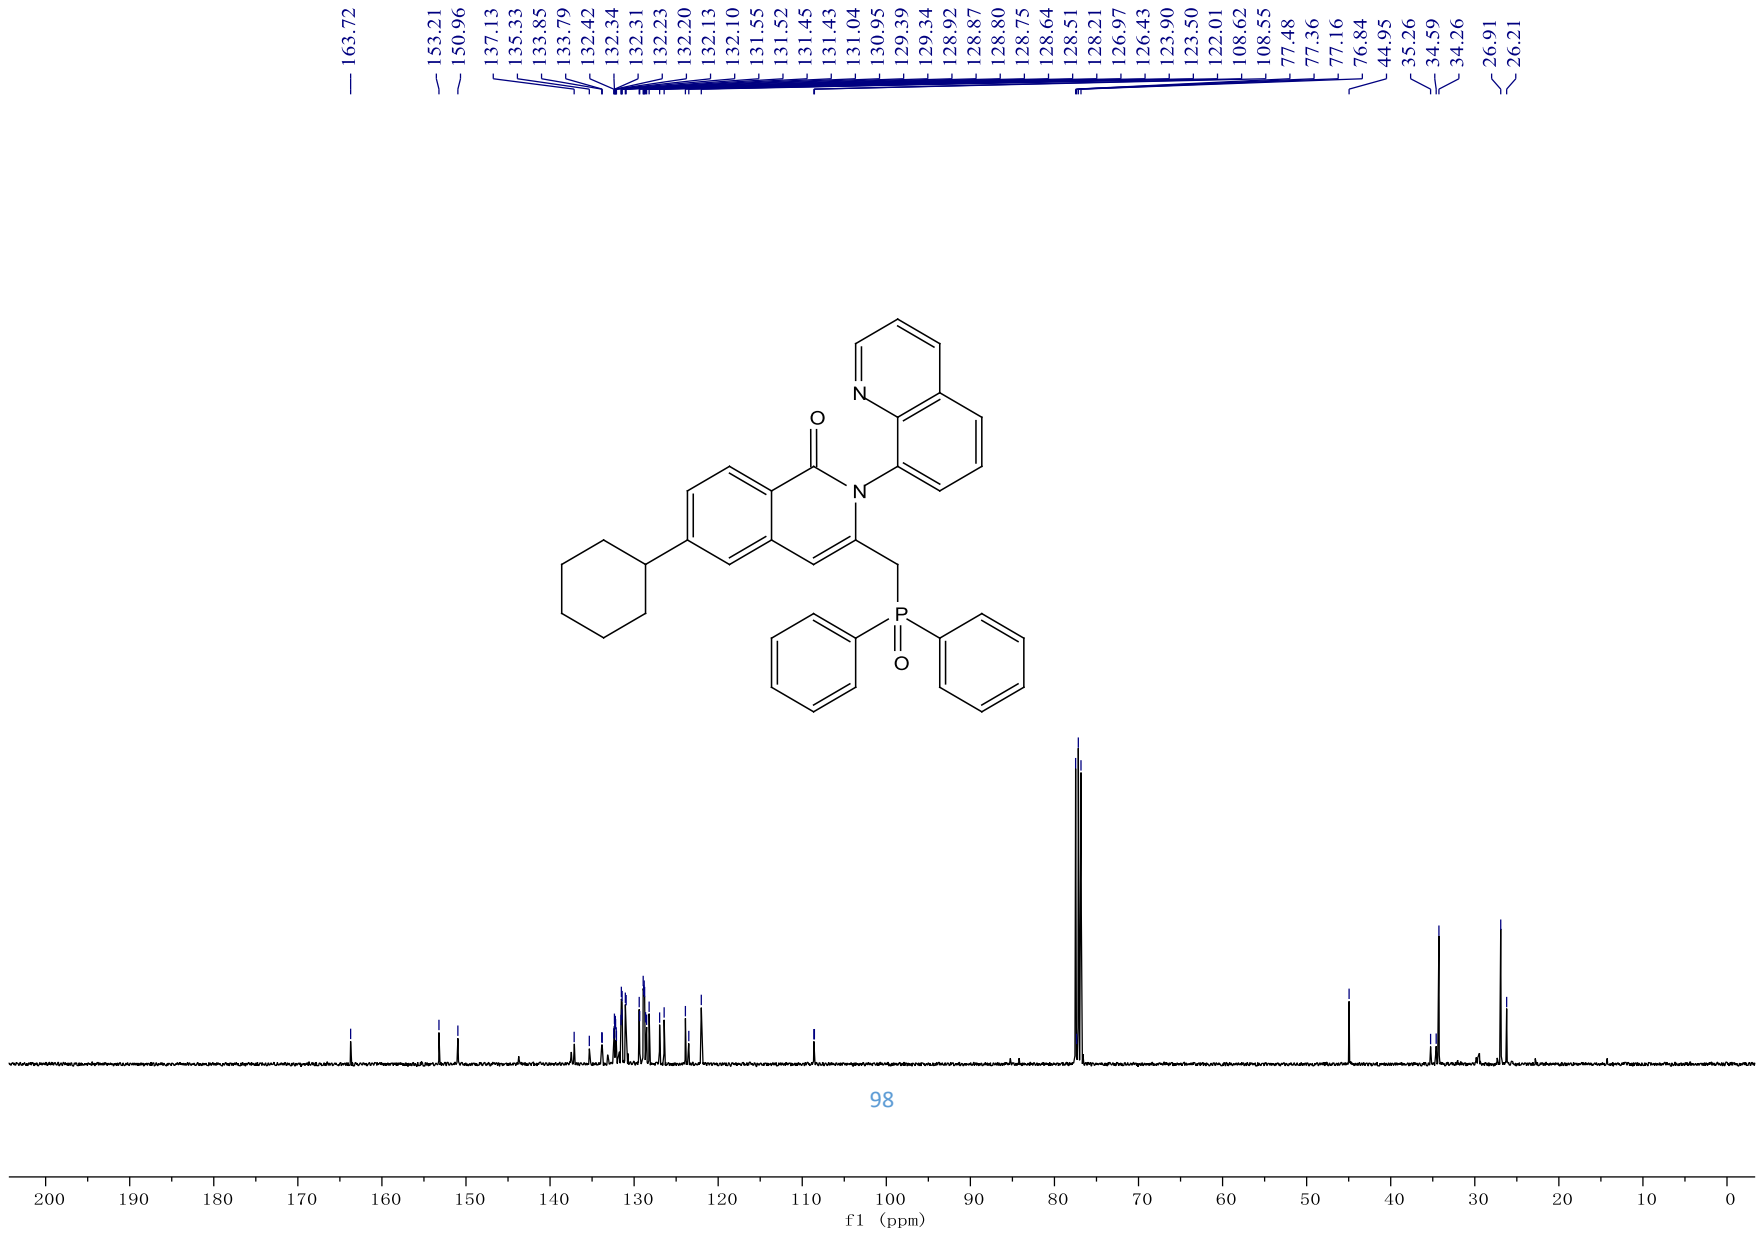

98

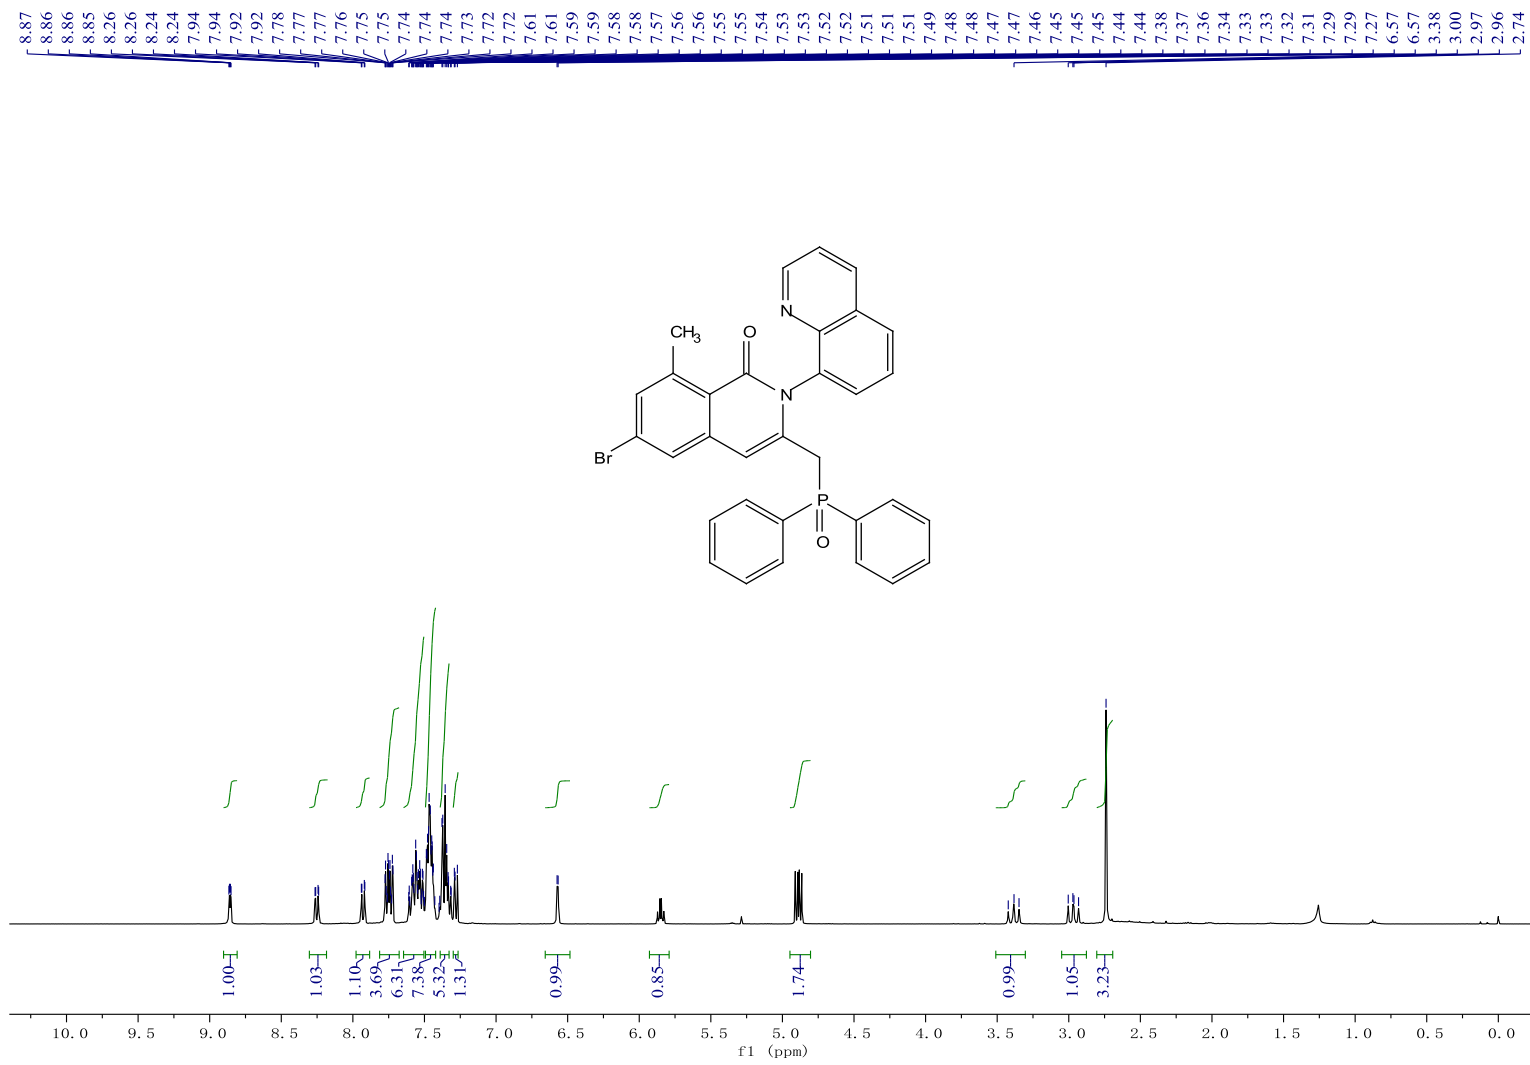

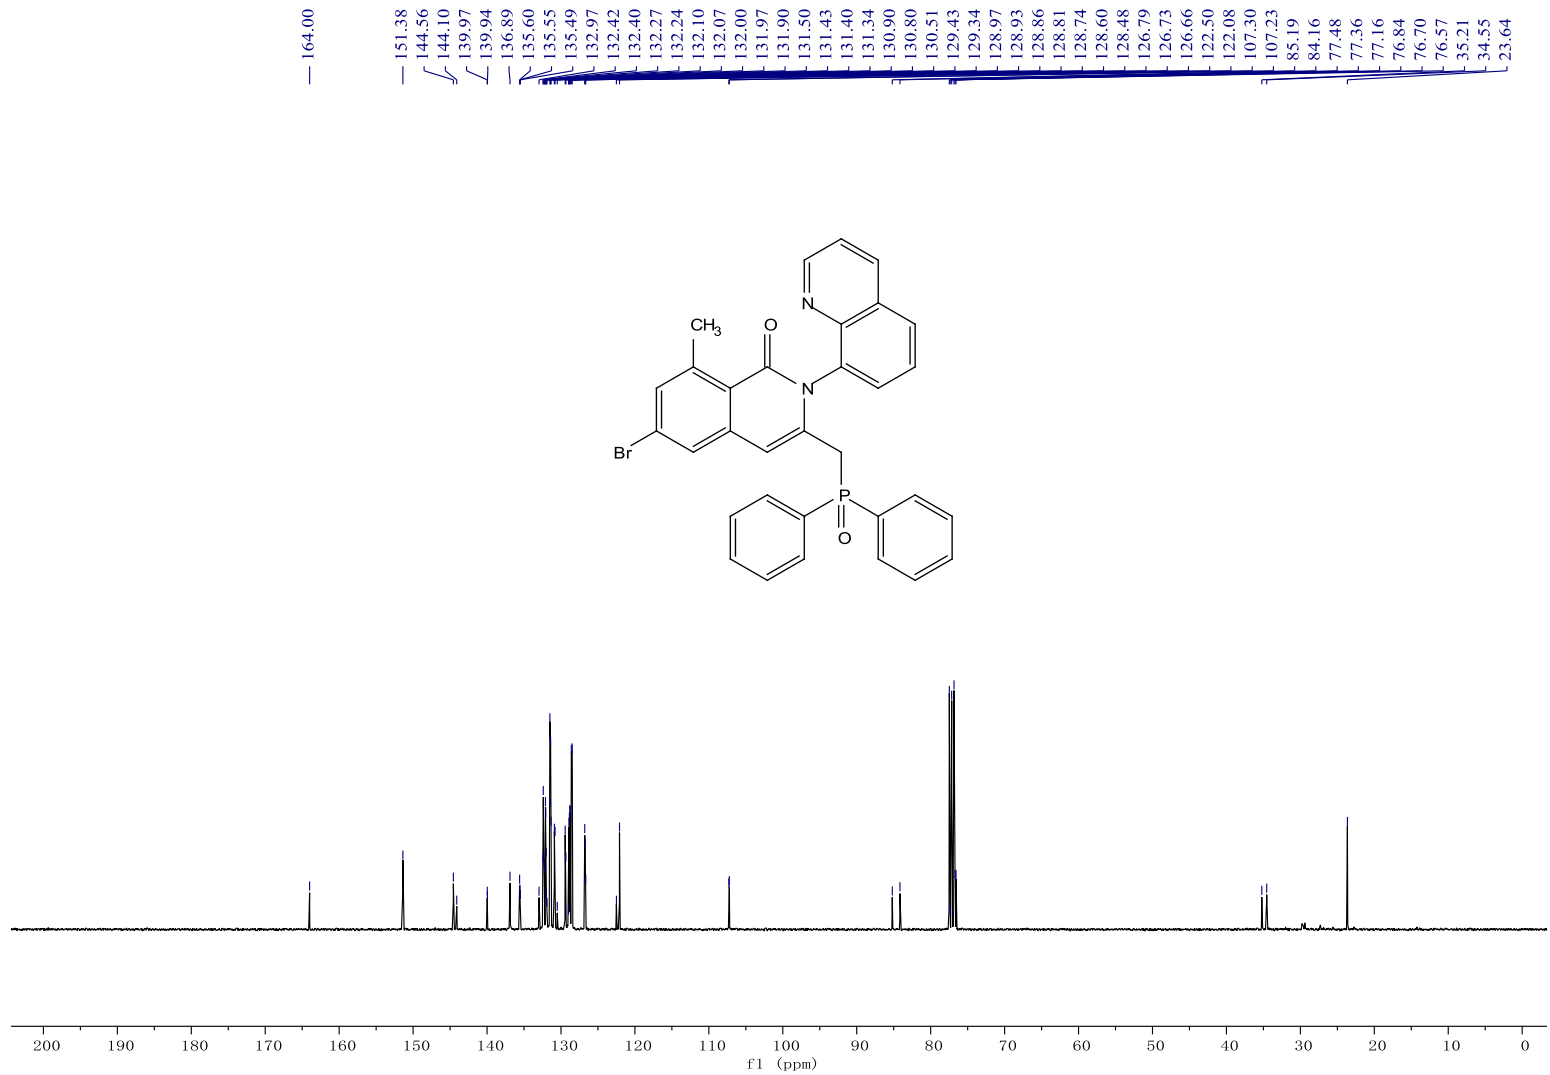



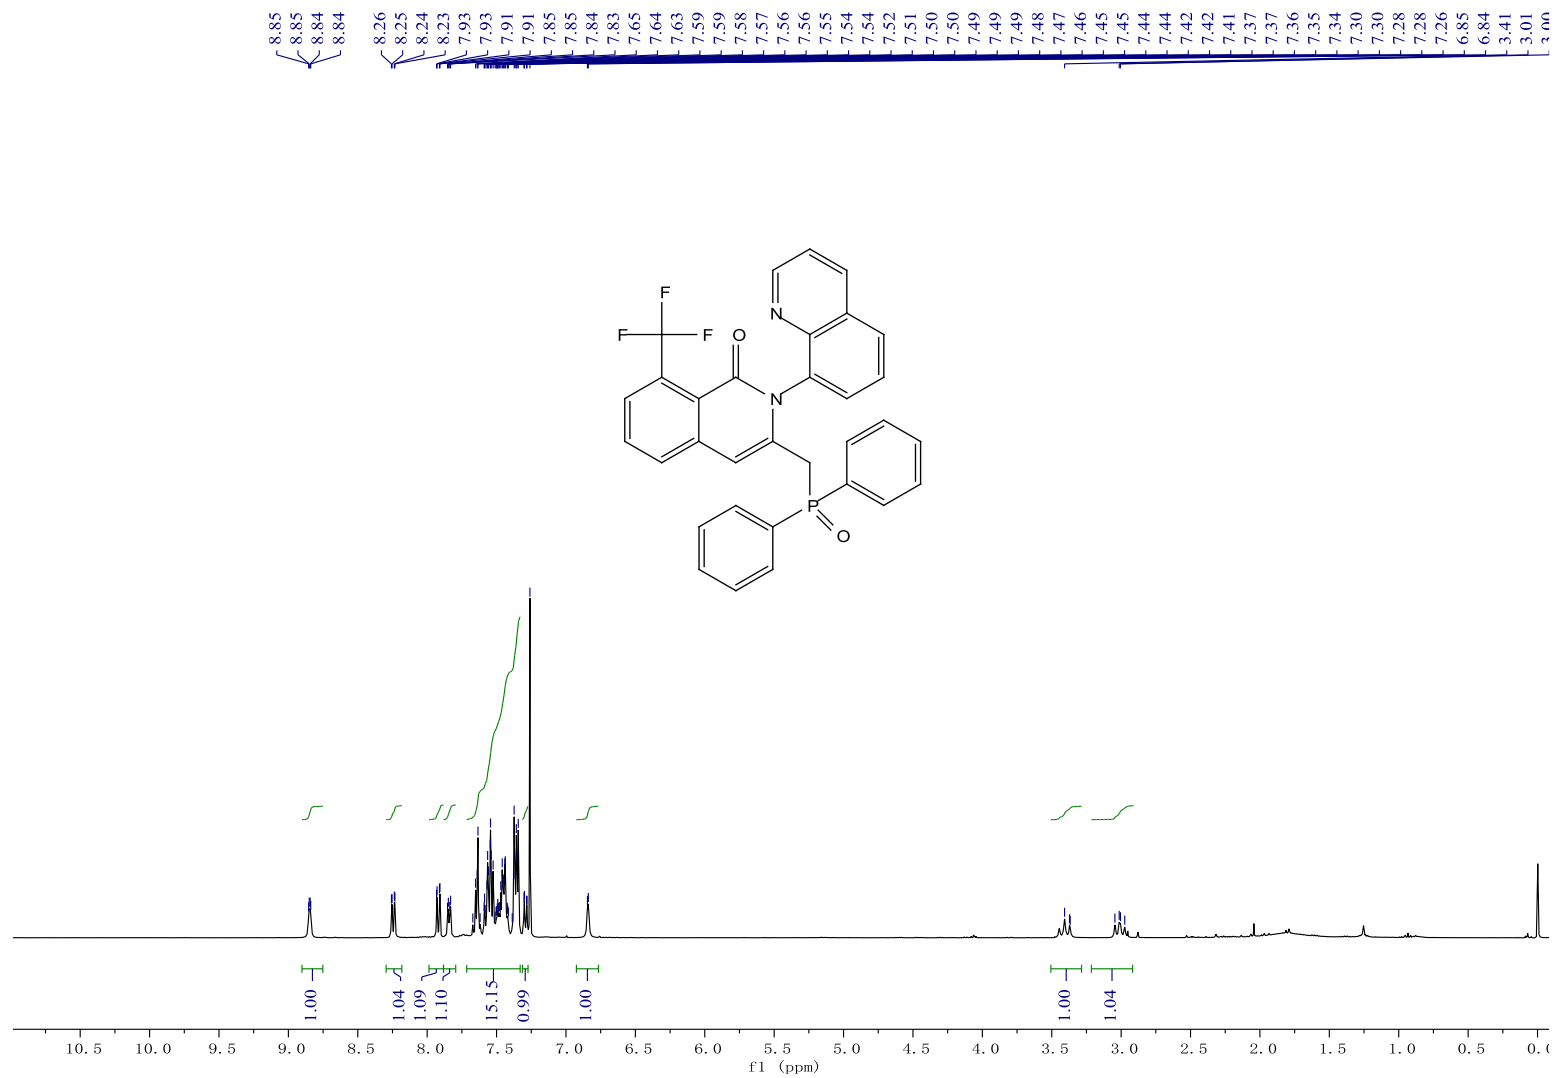

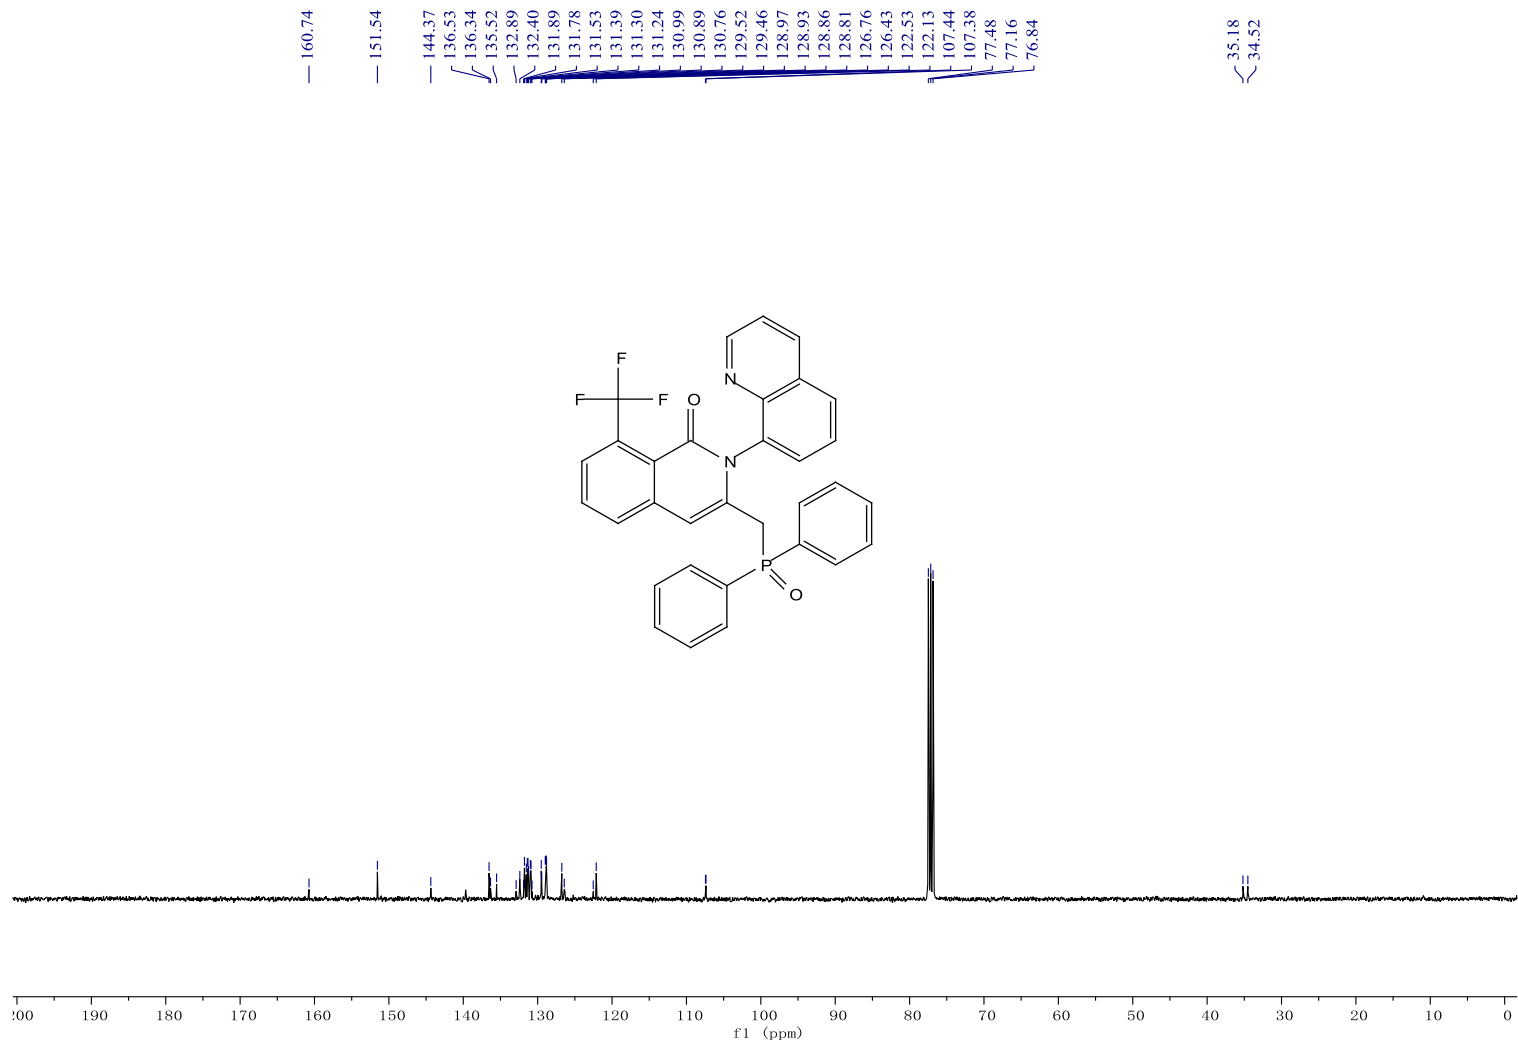

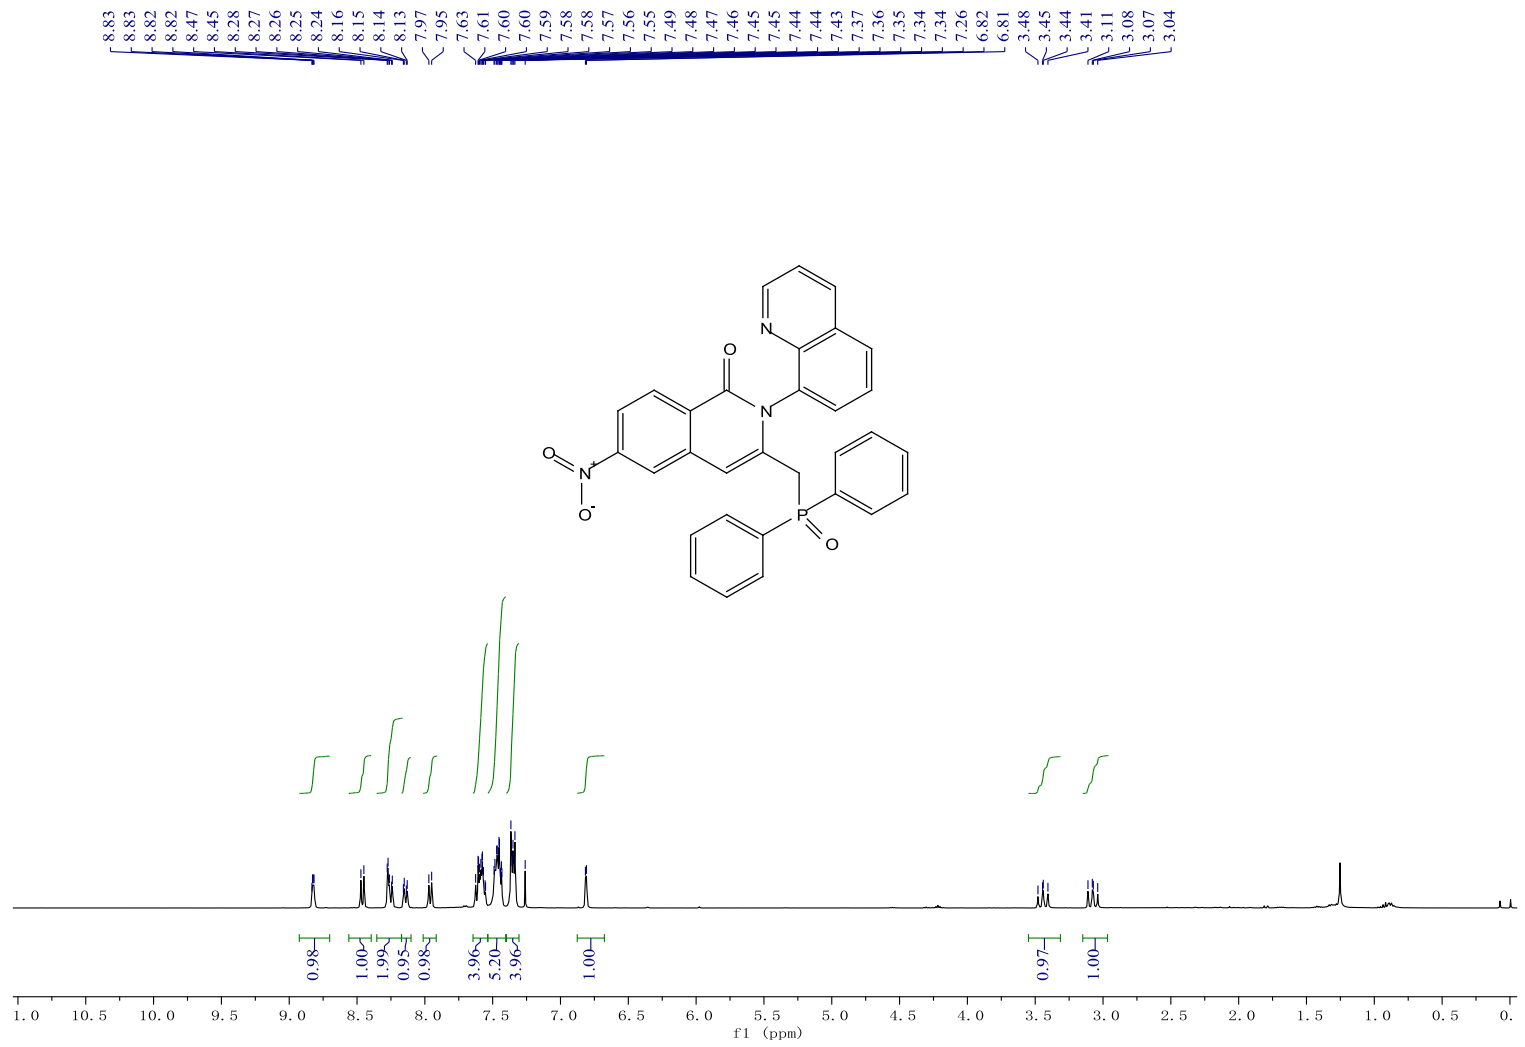

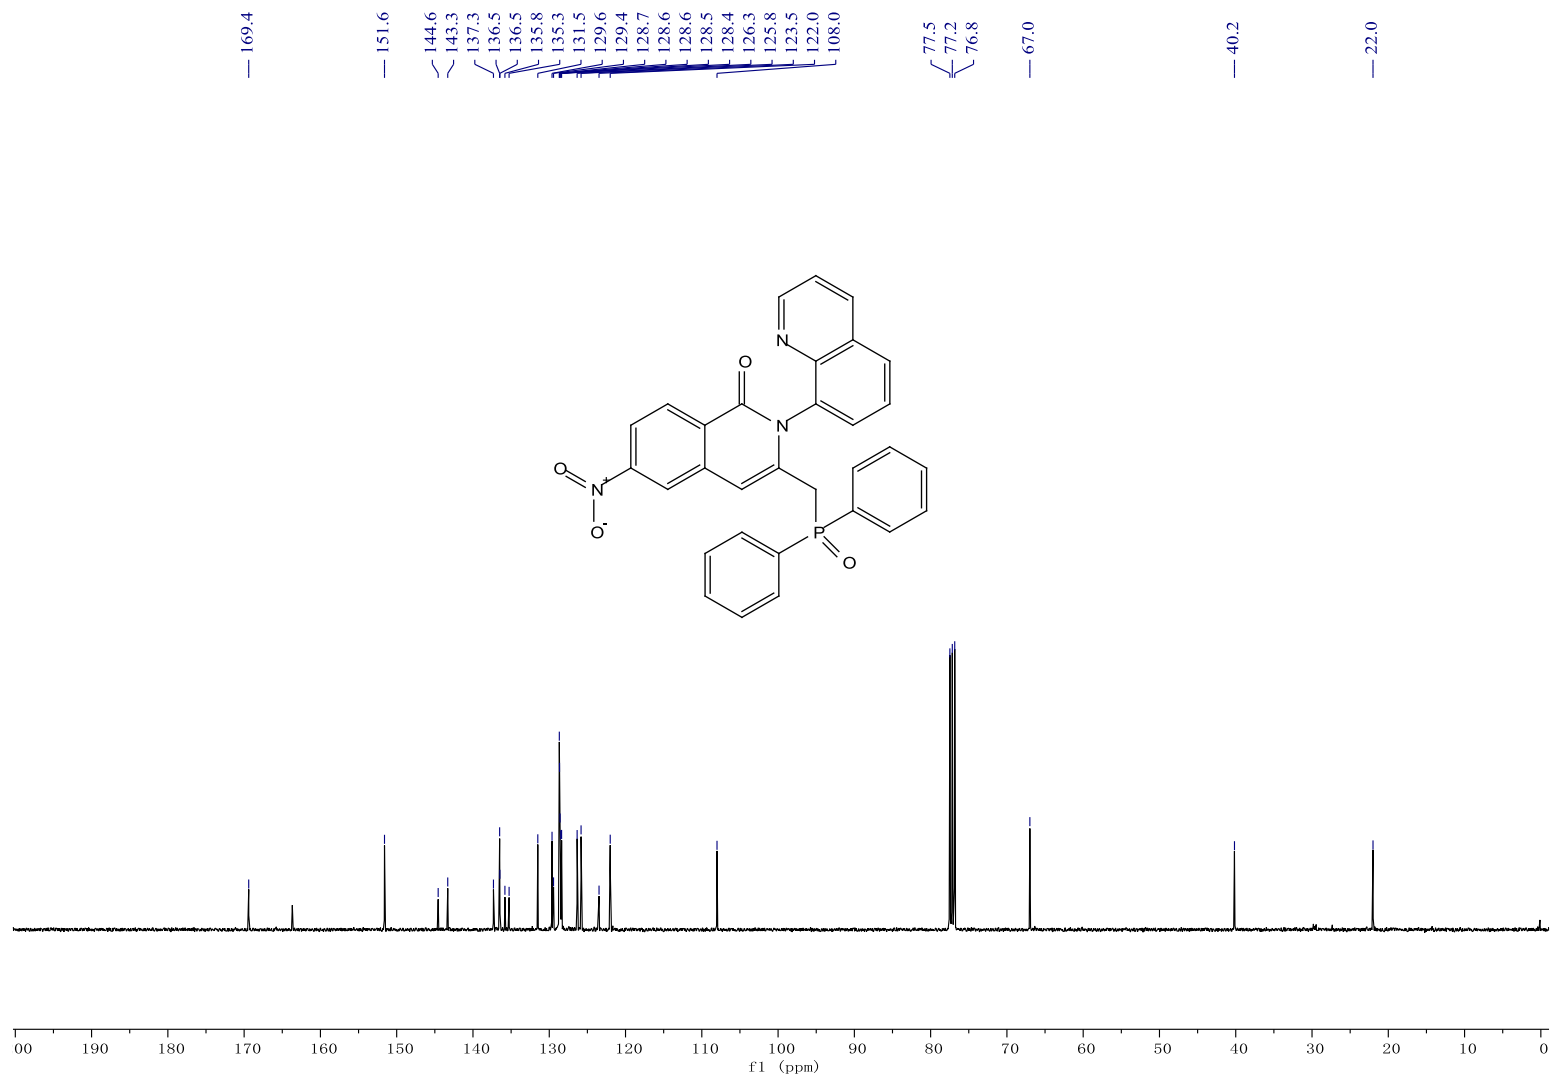

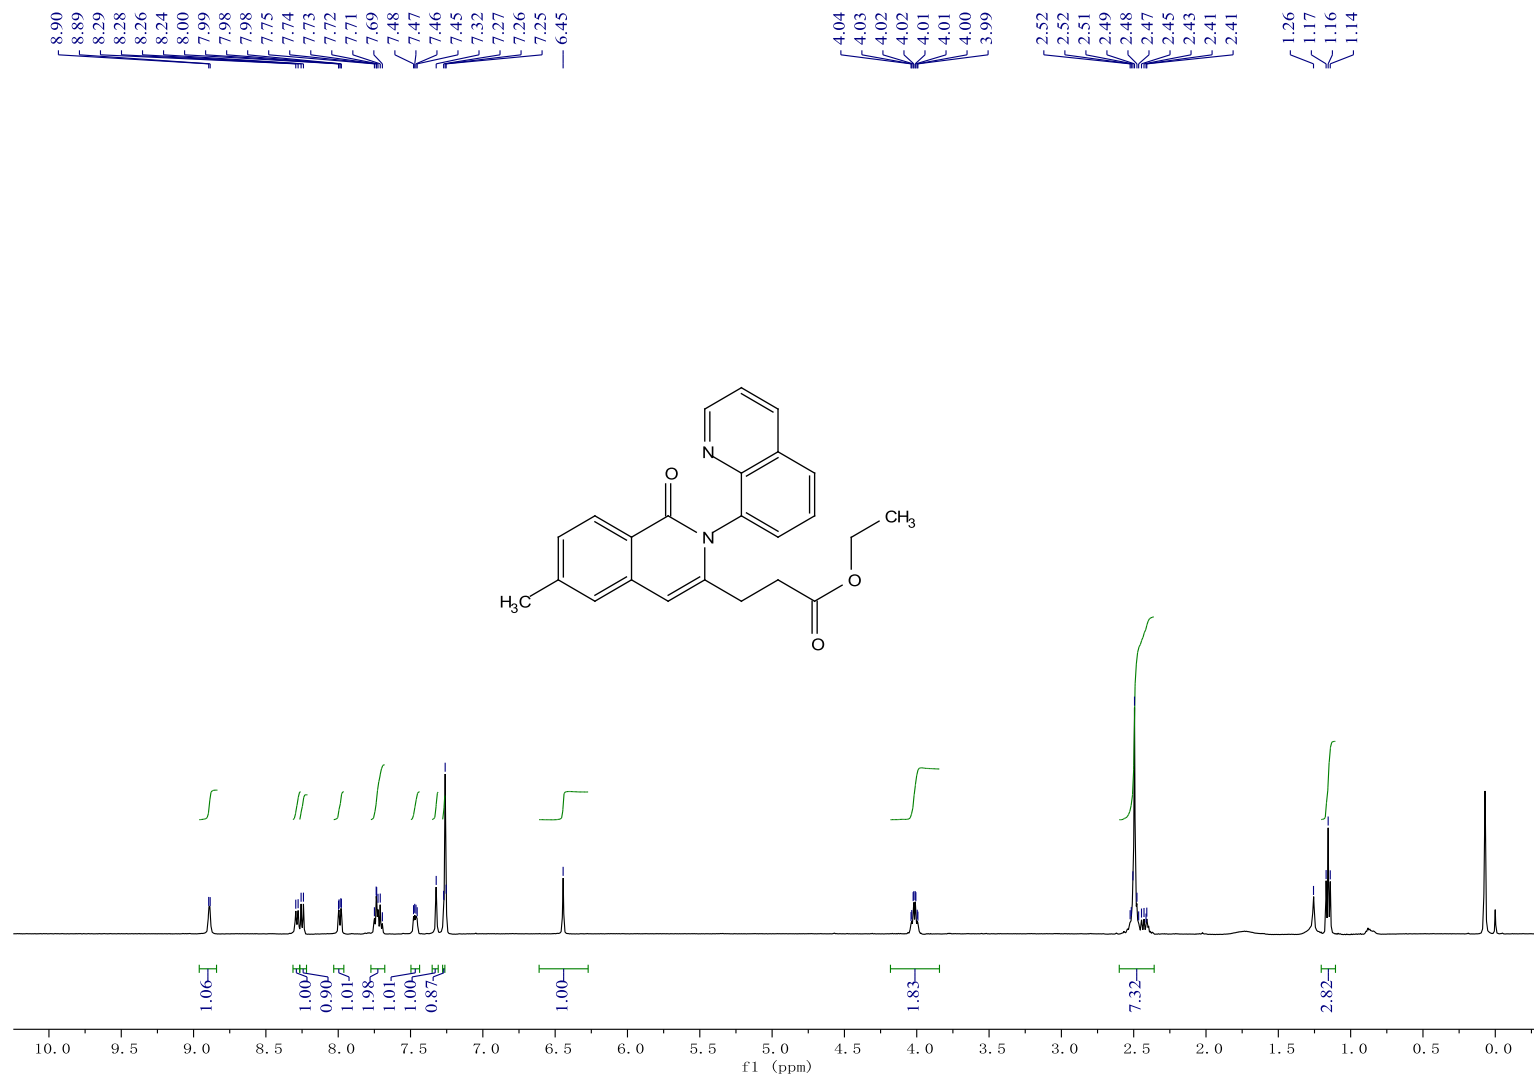

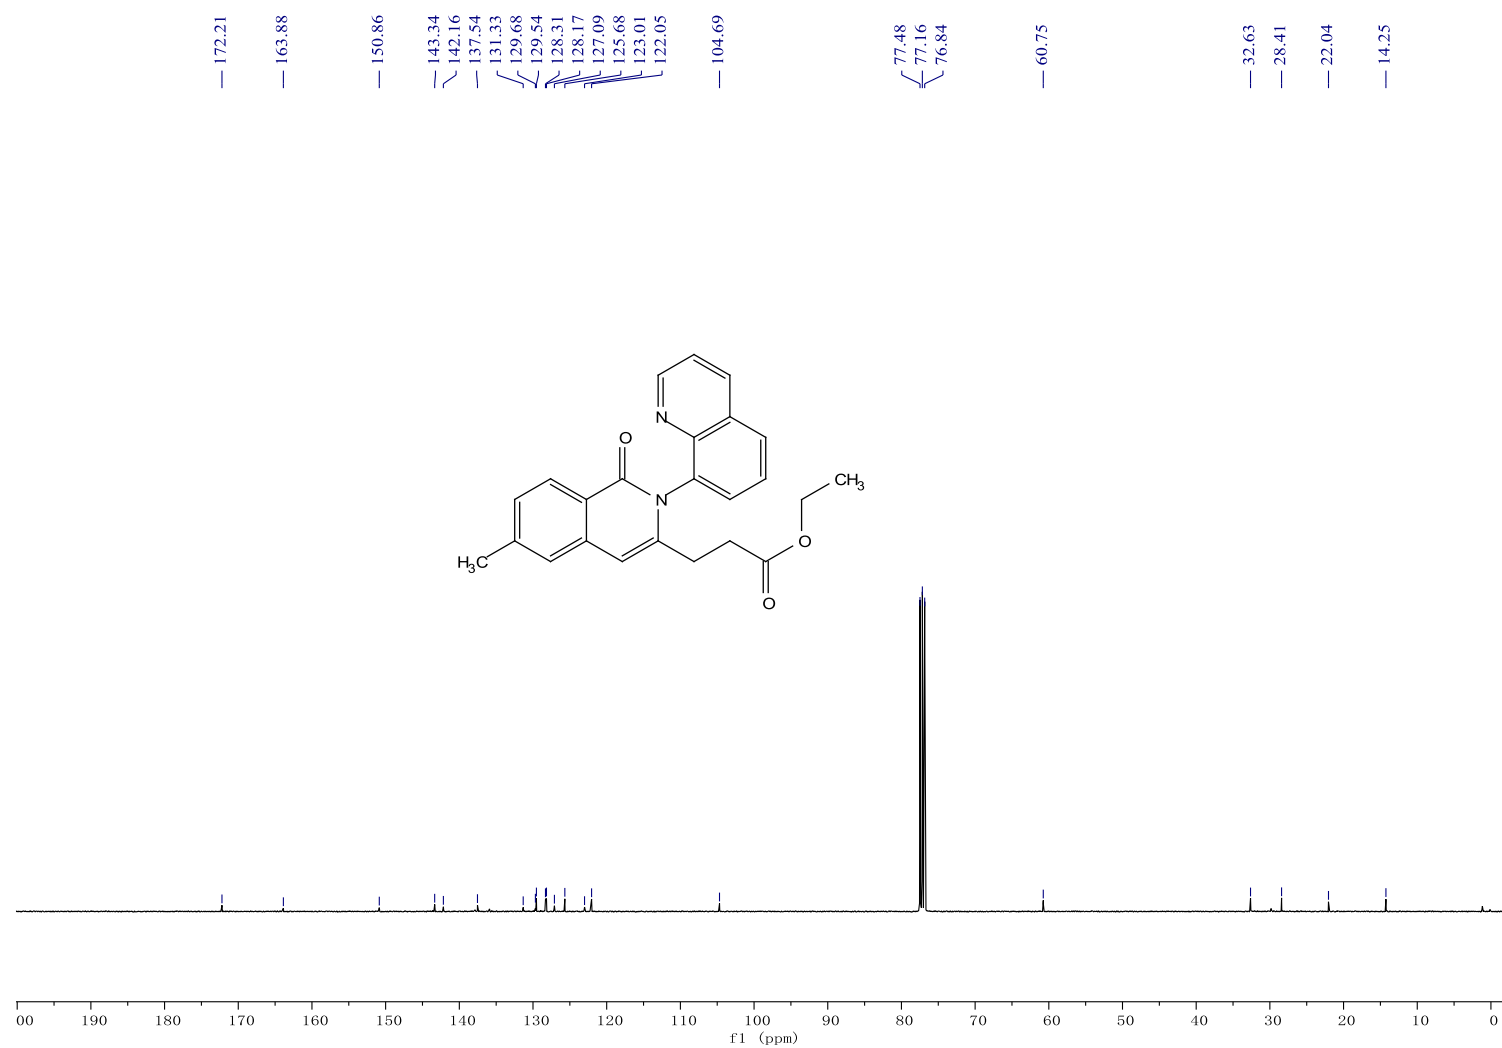

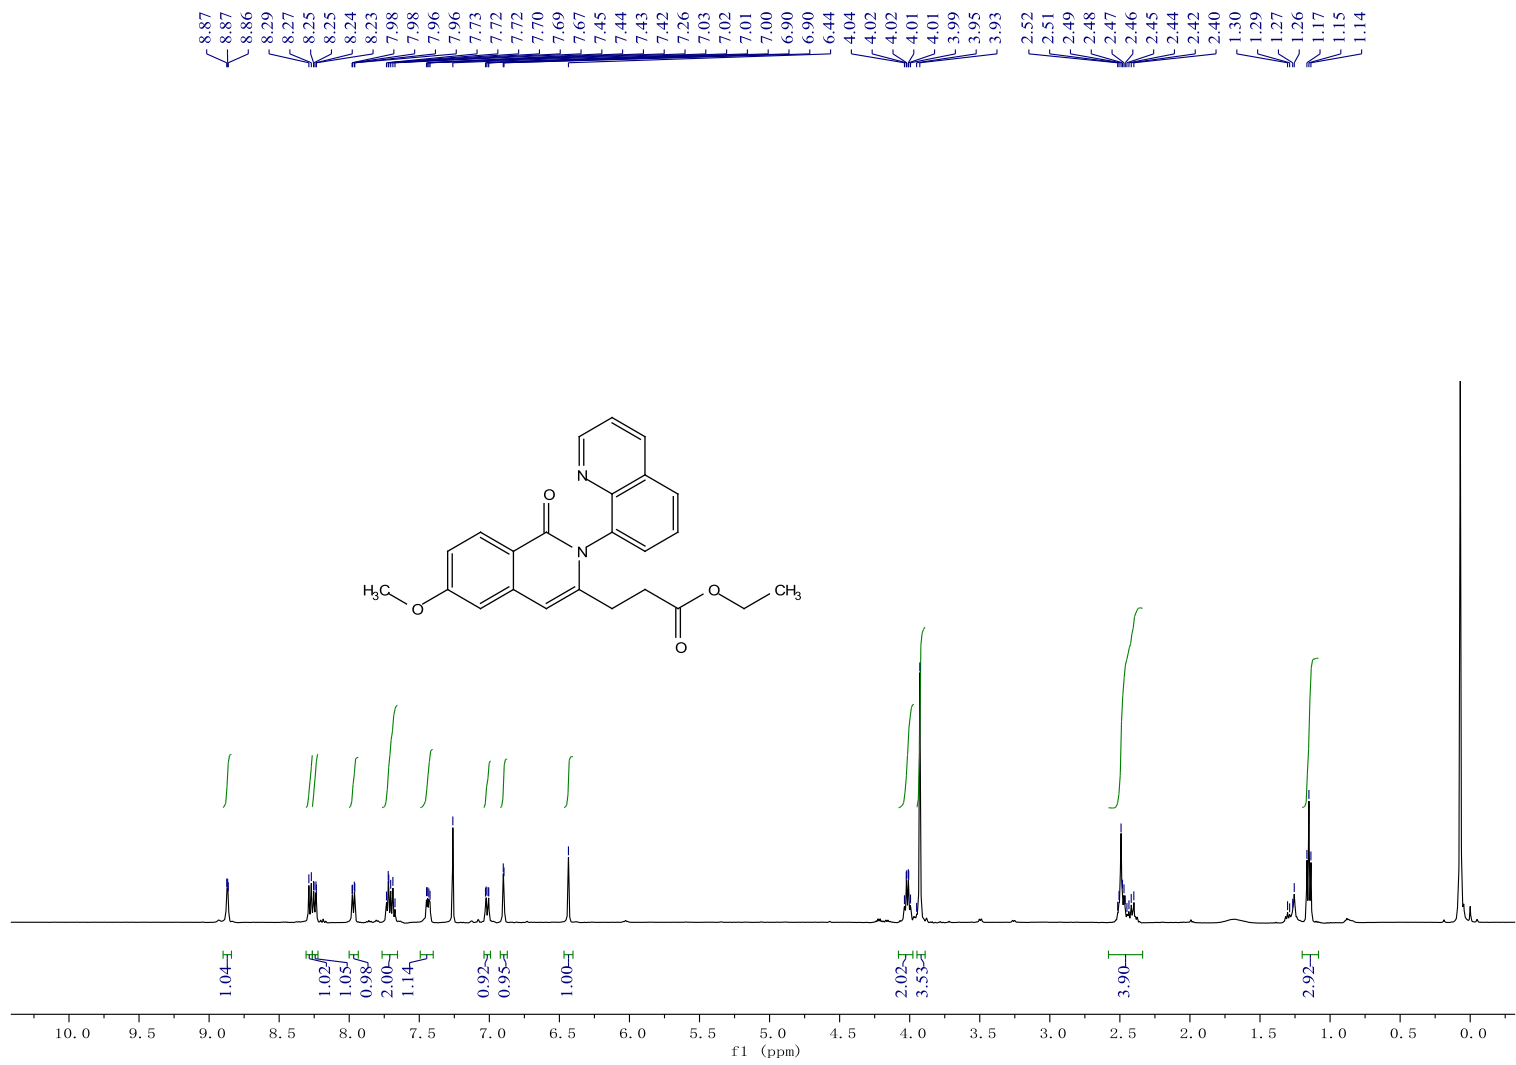

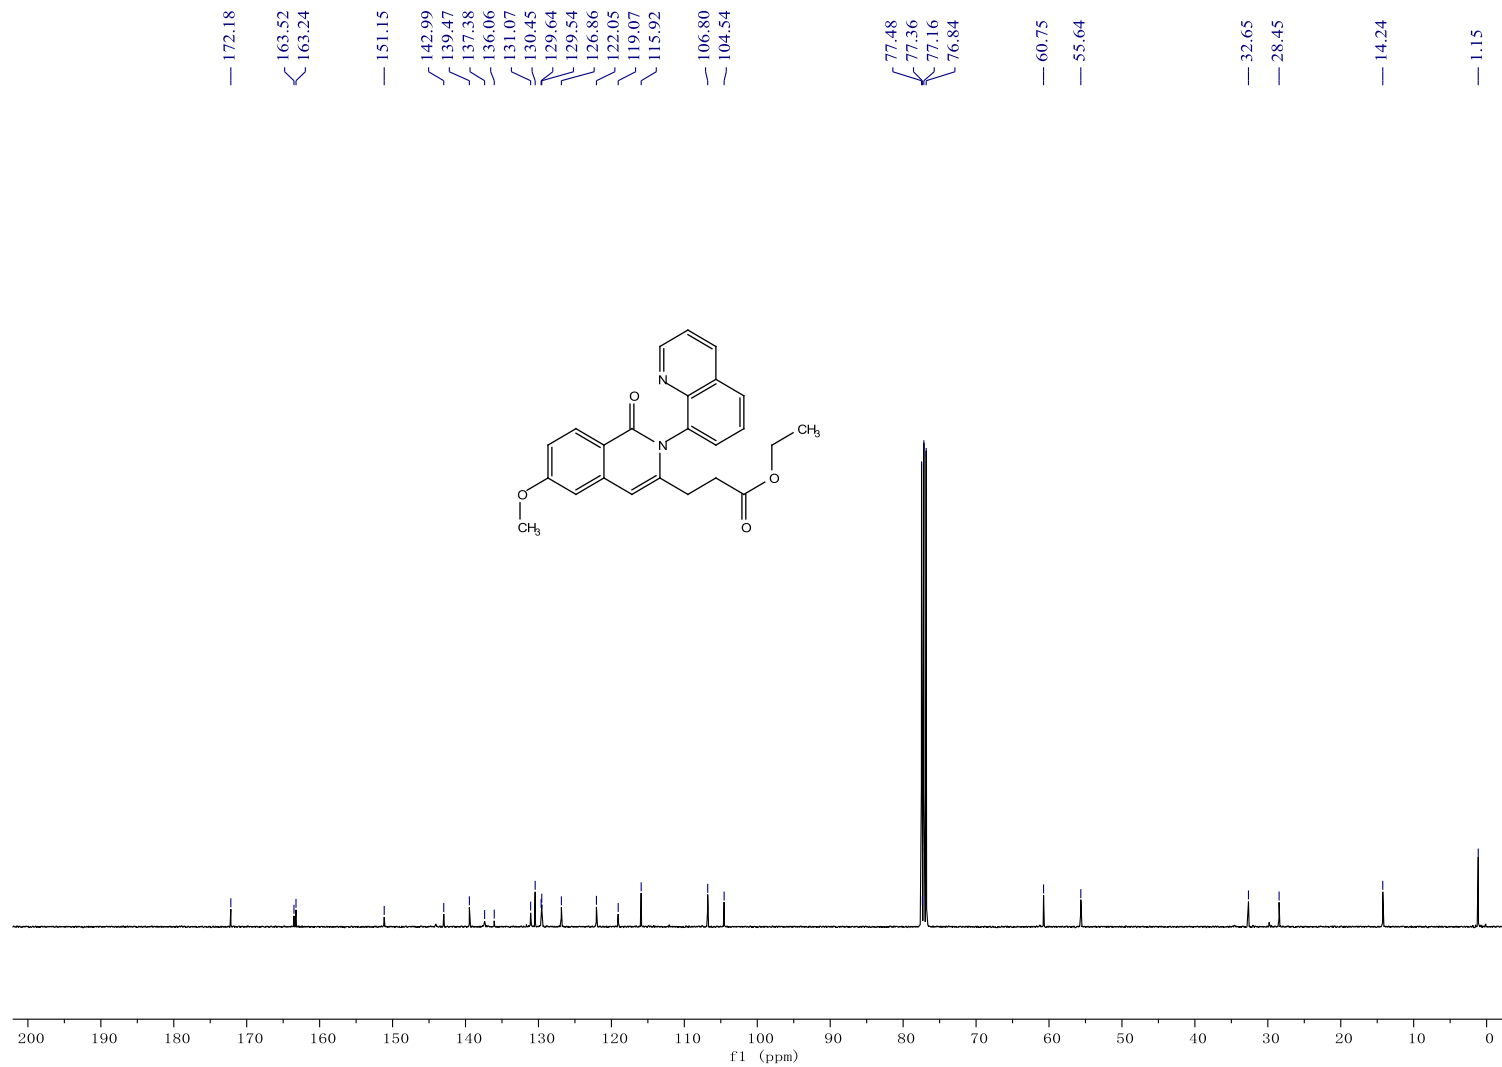



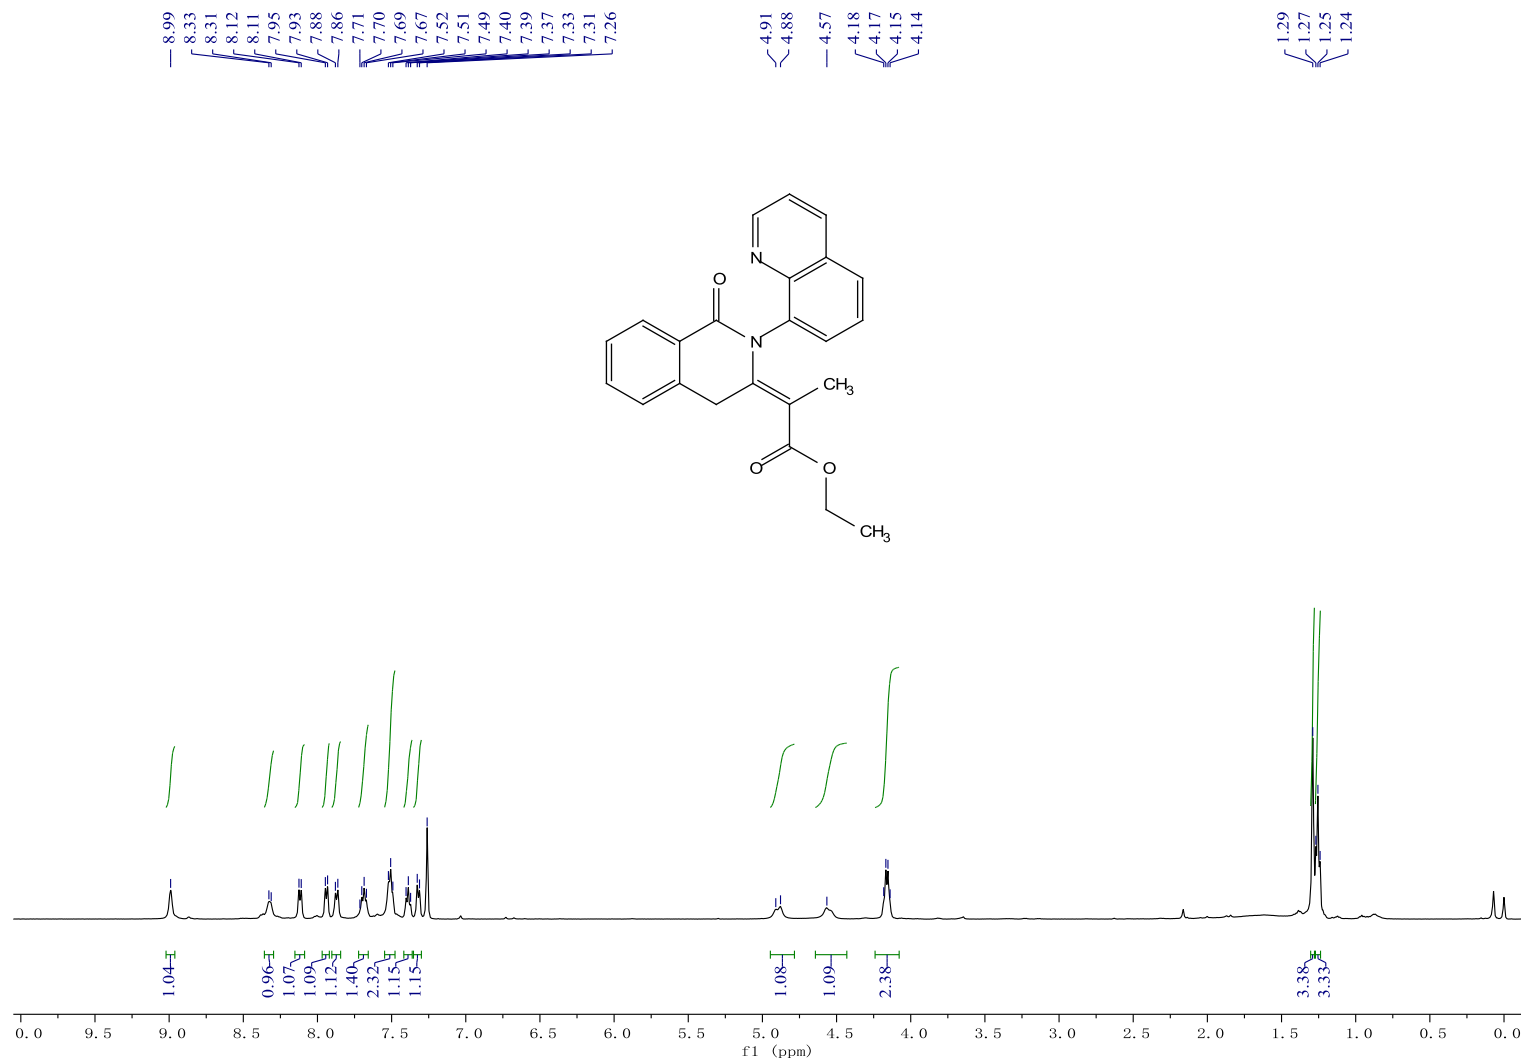

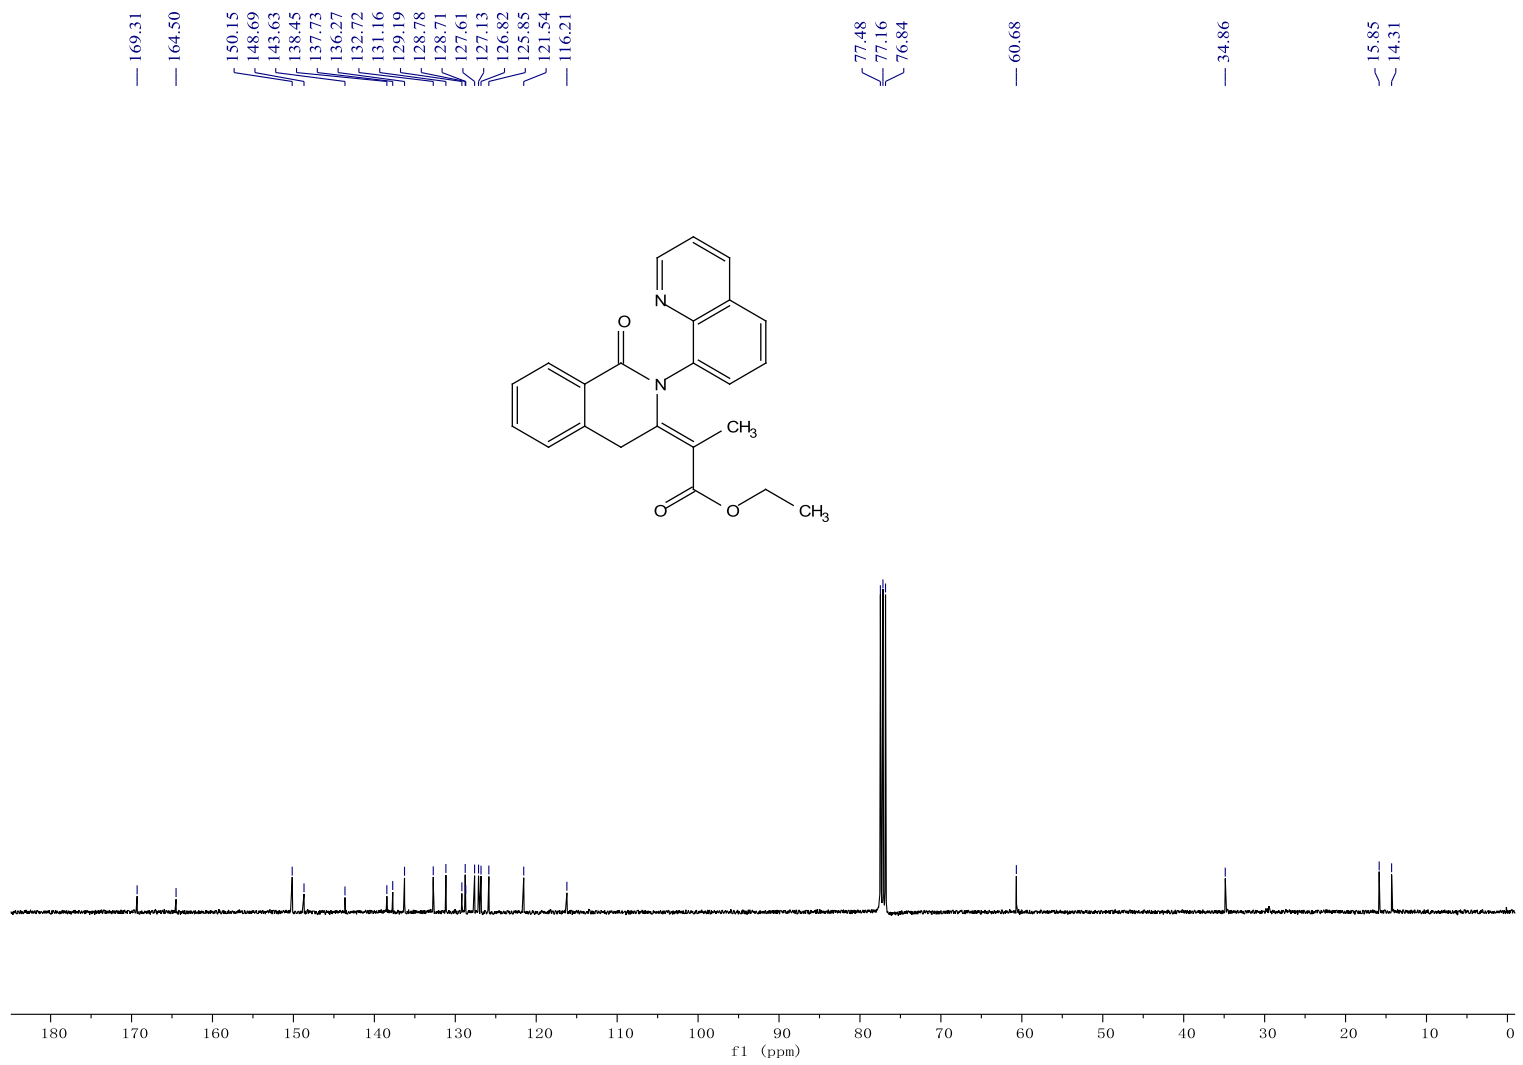

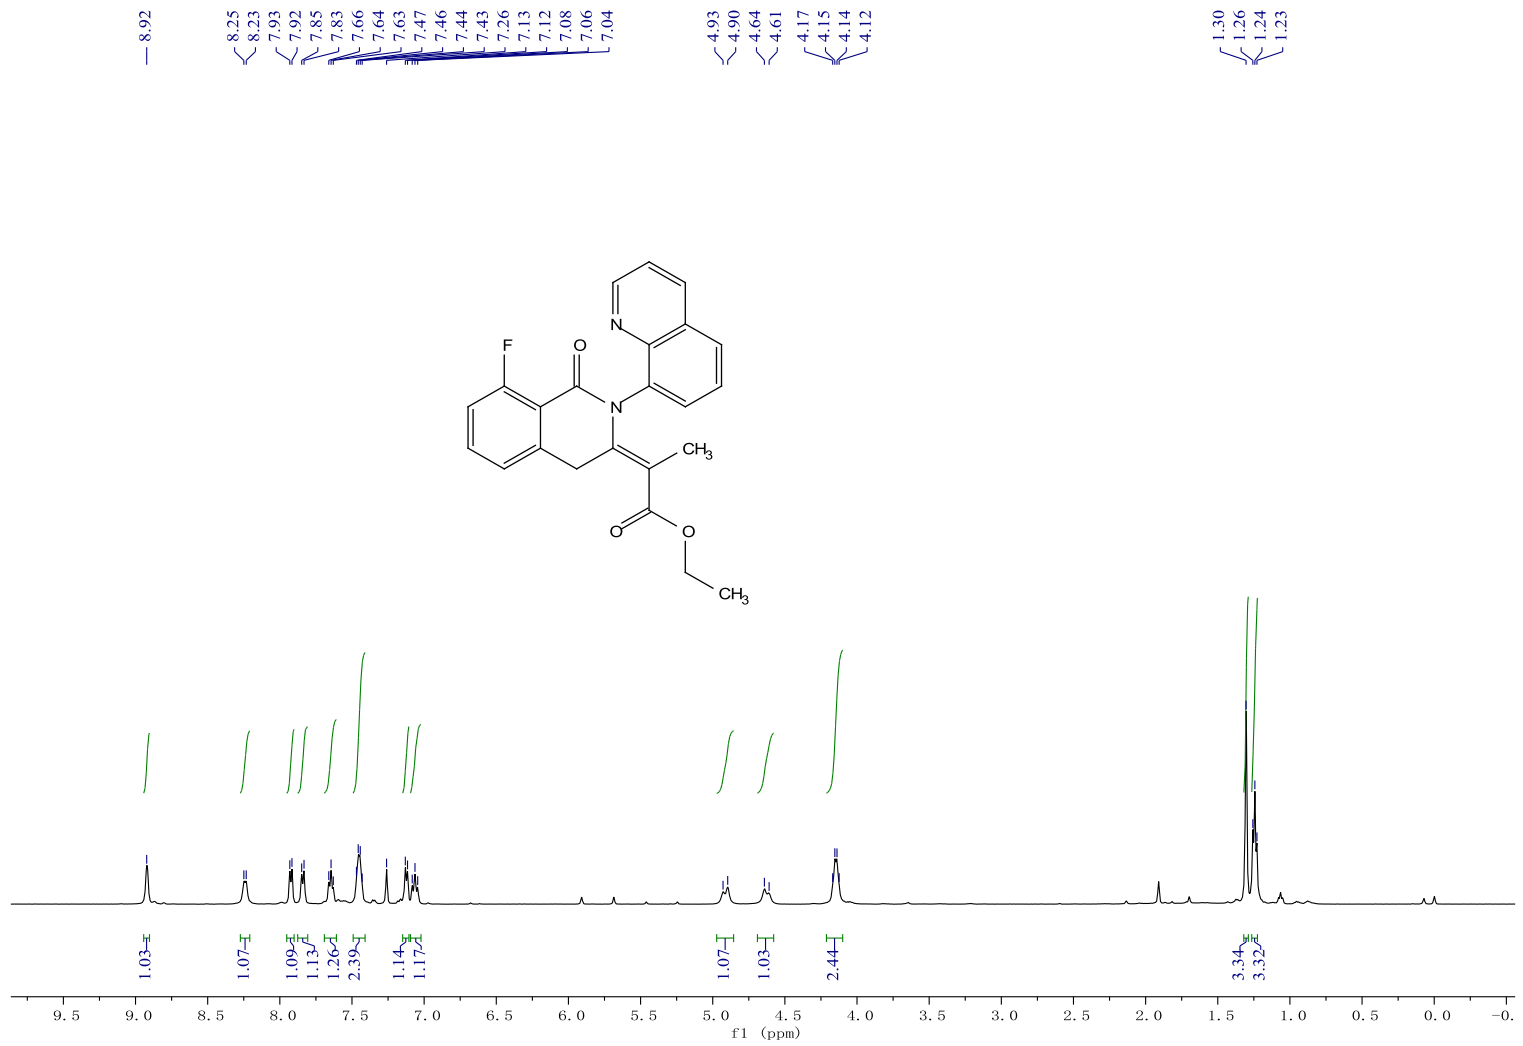

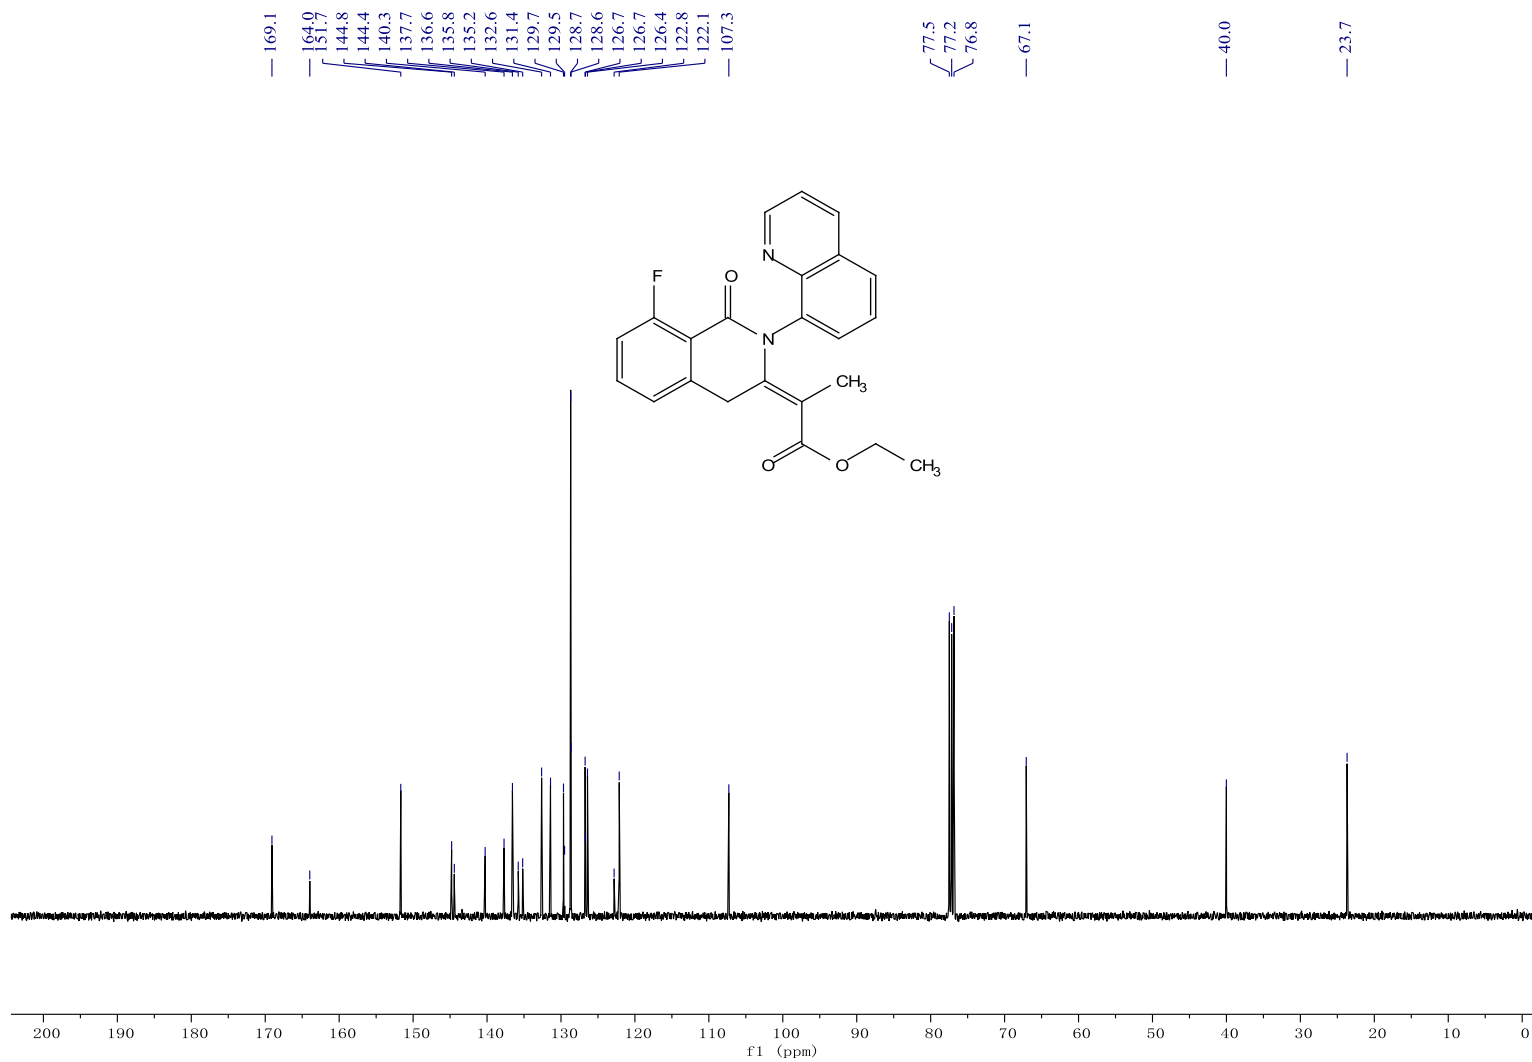

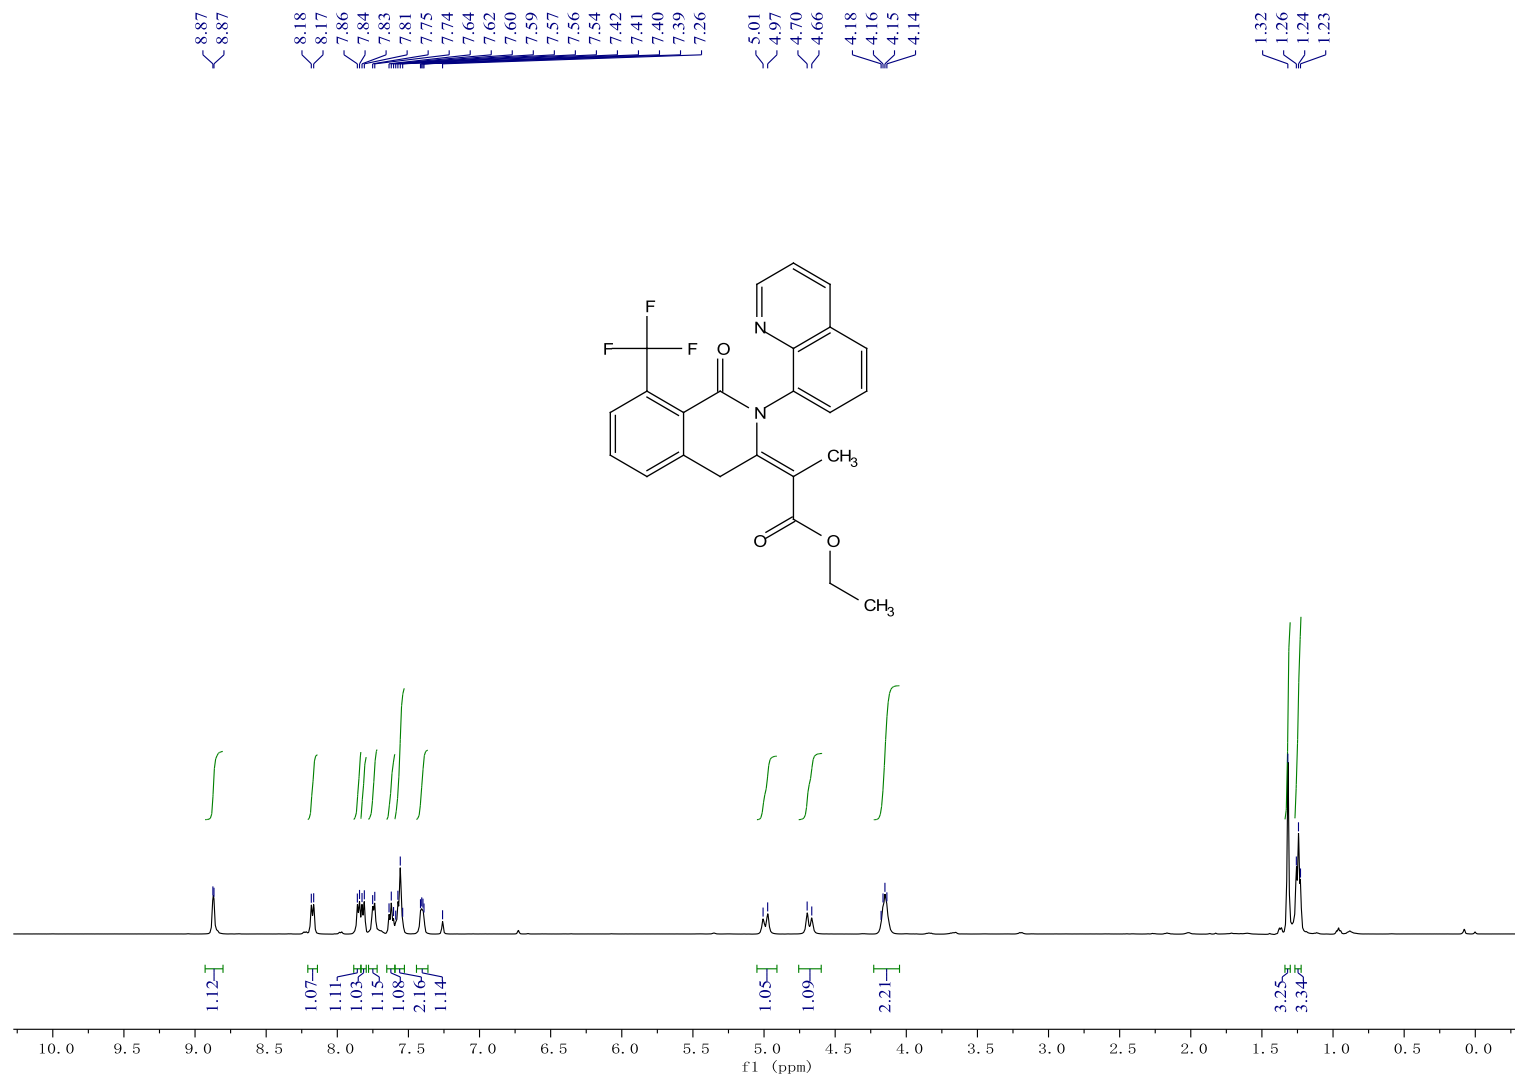

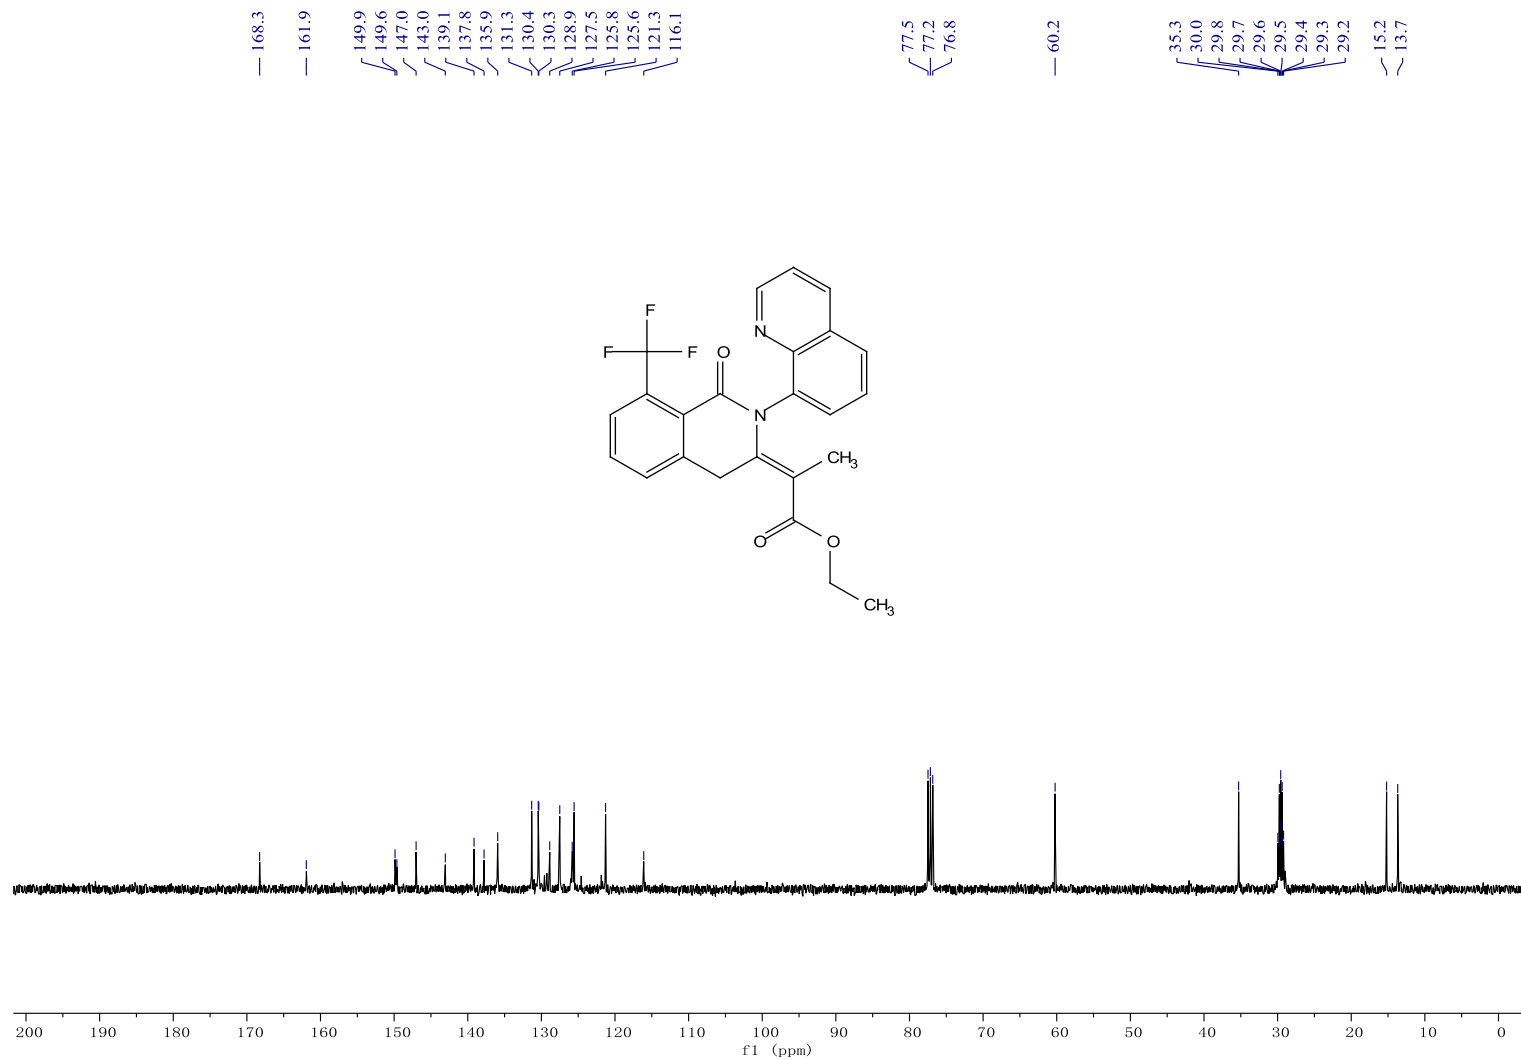

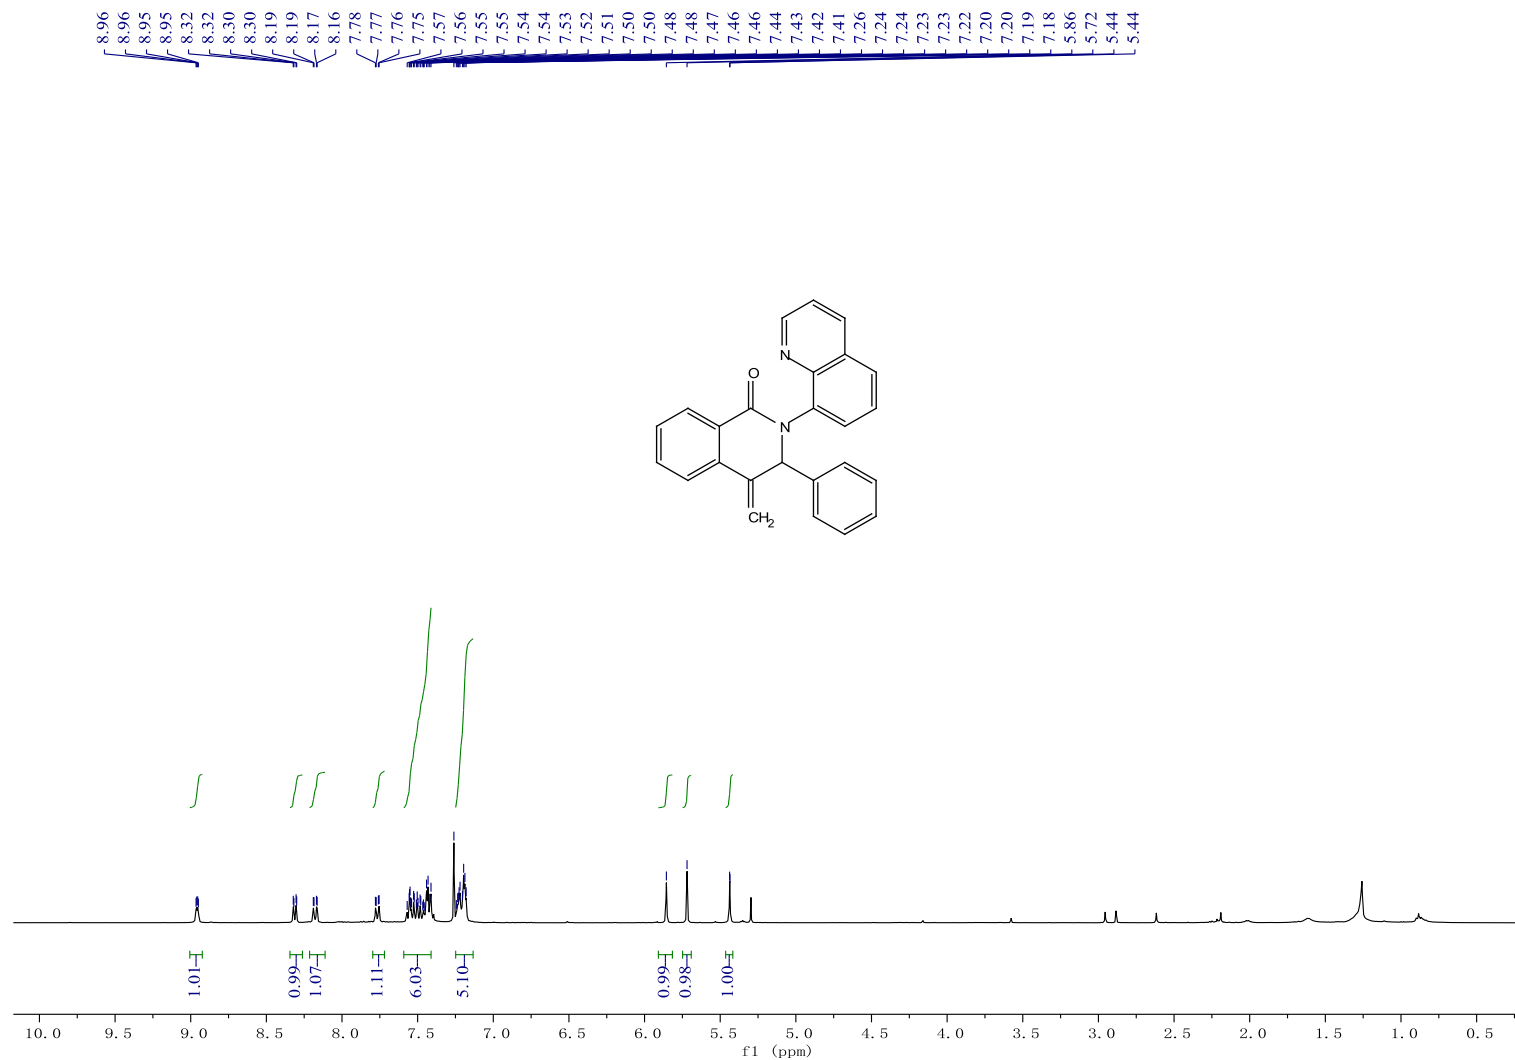

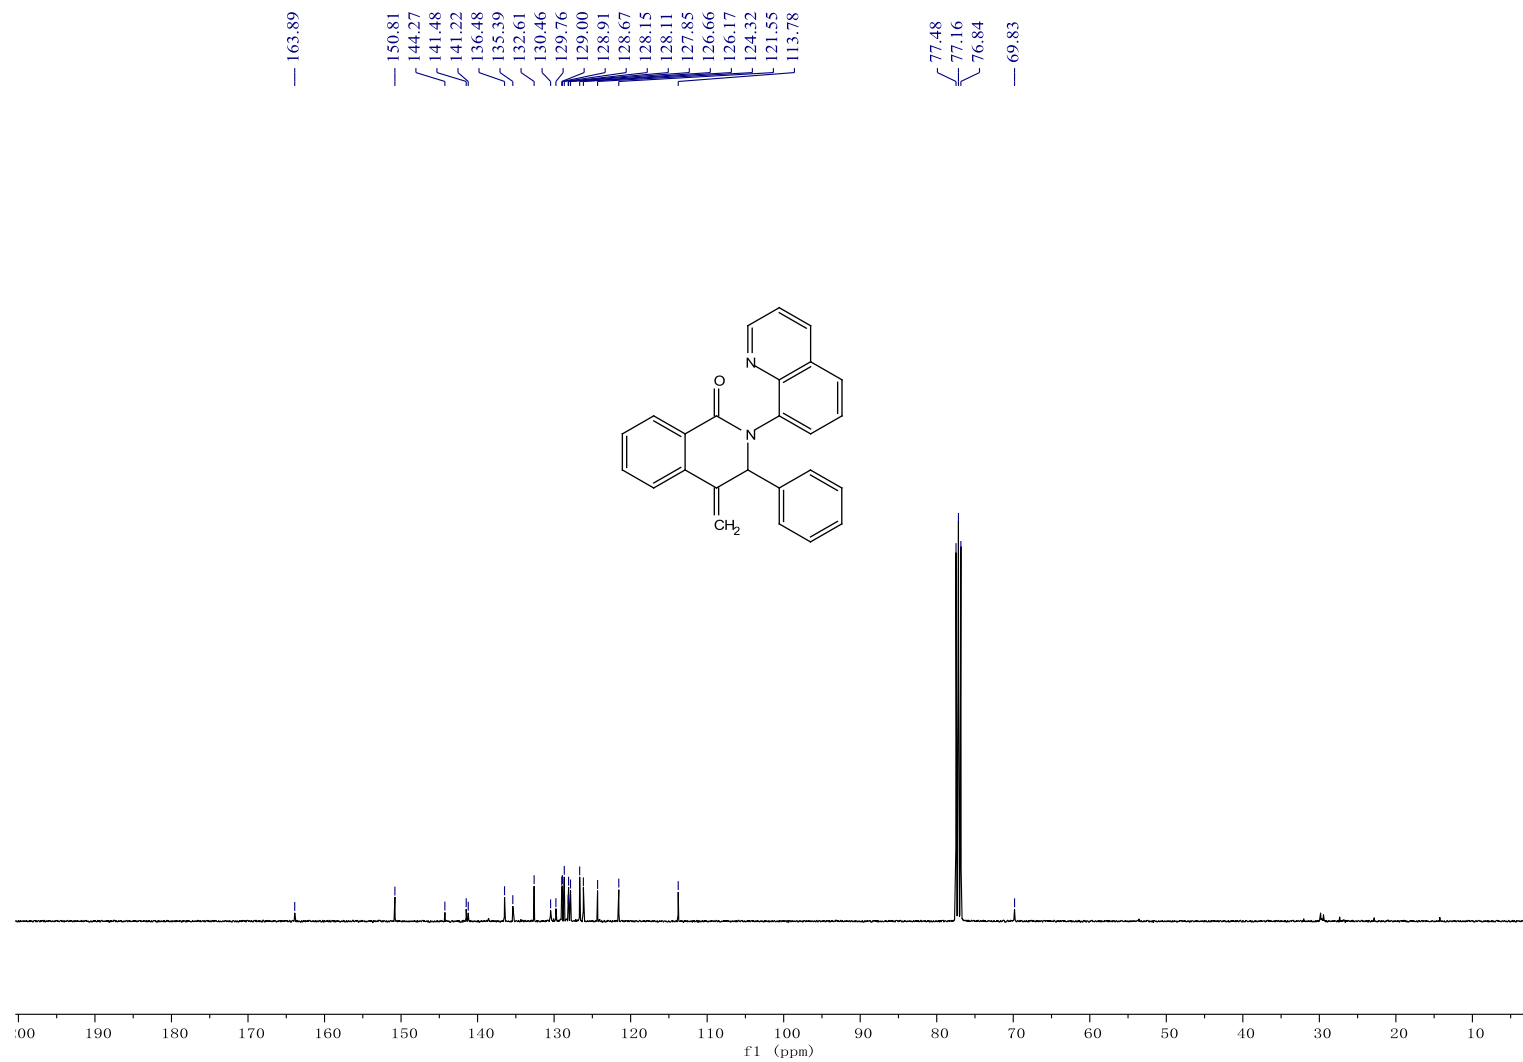



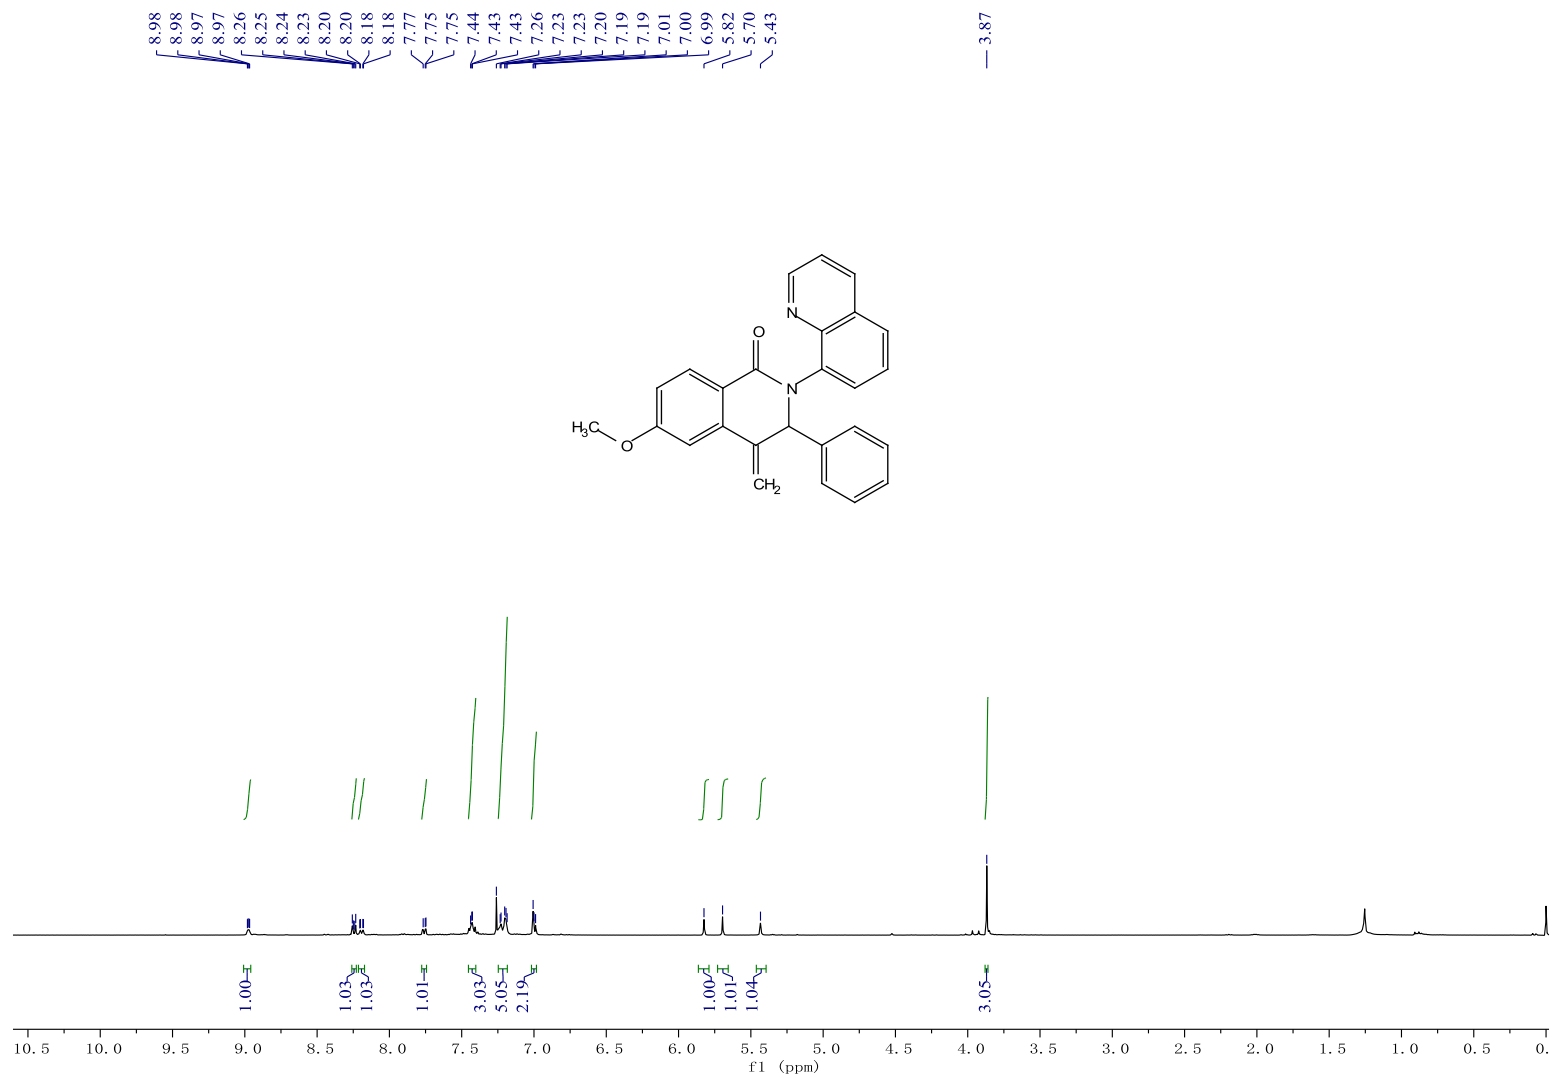

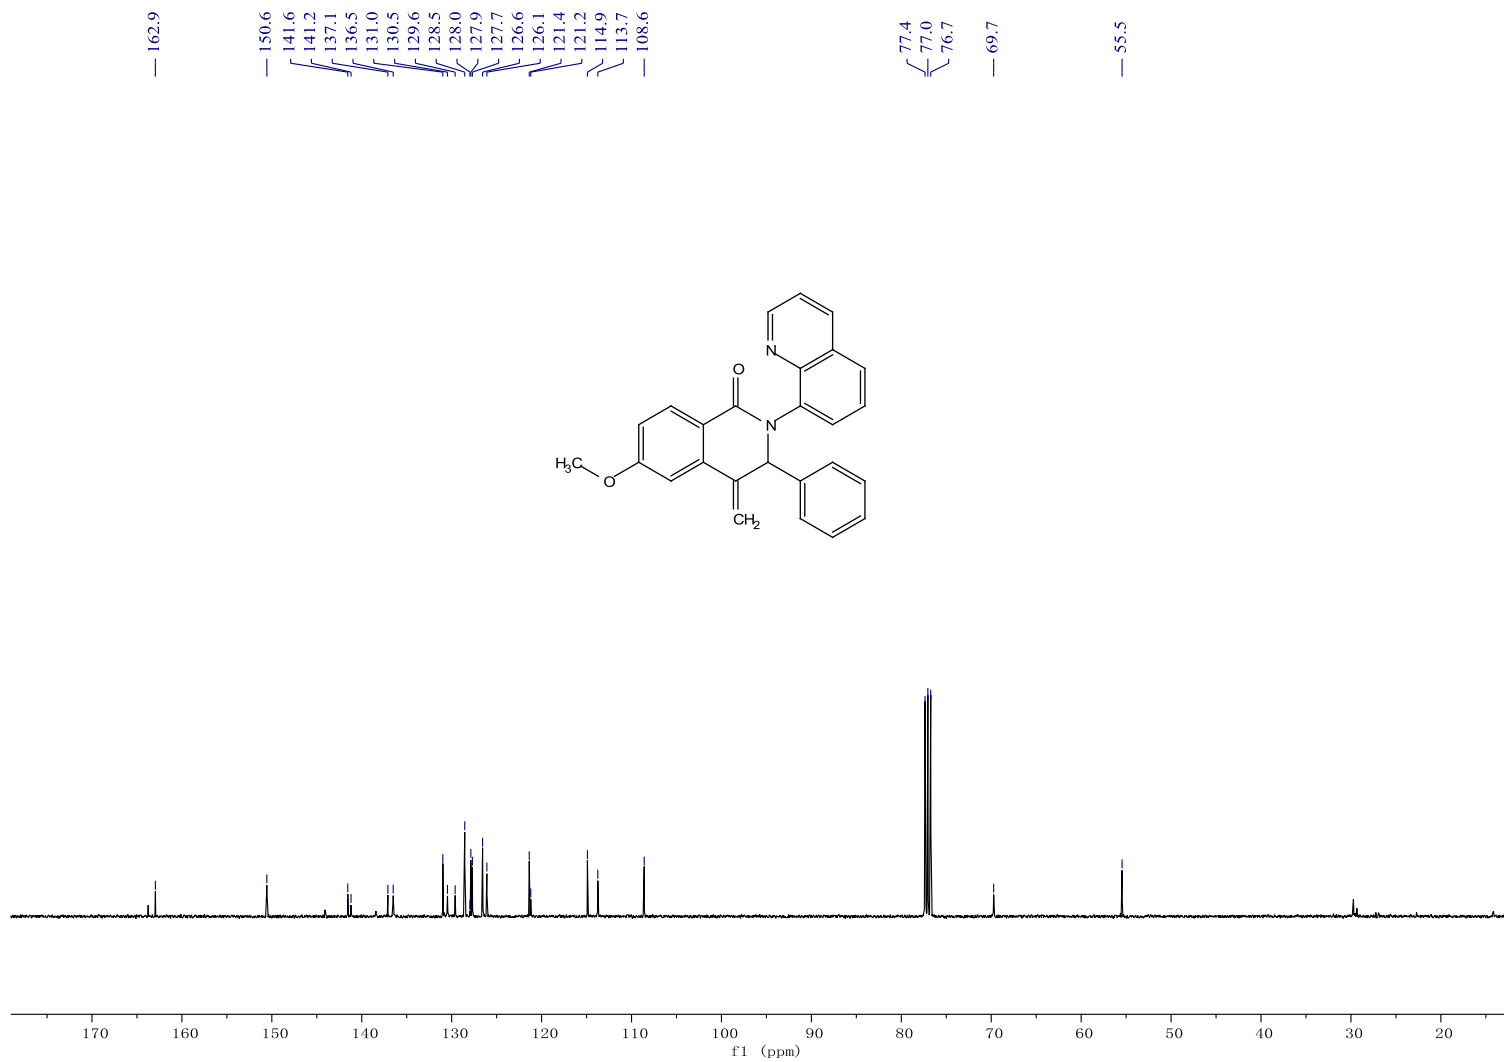

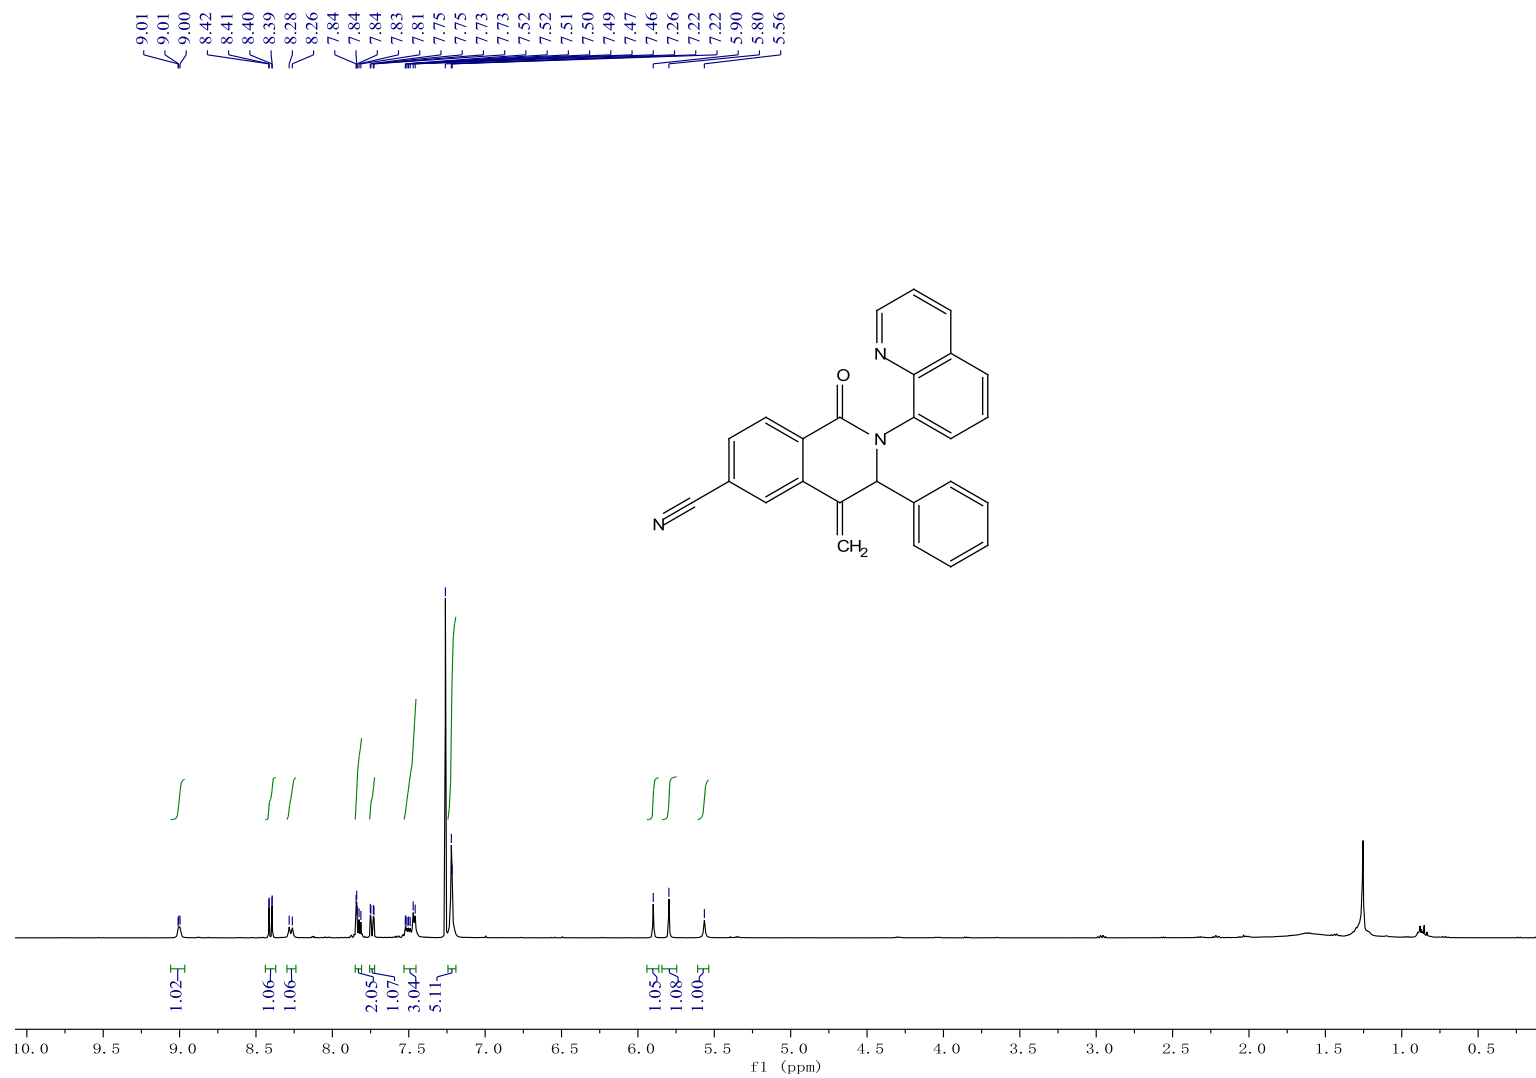

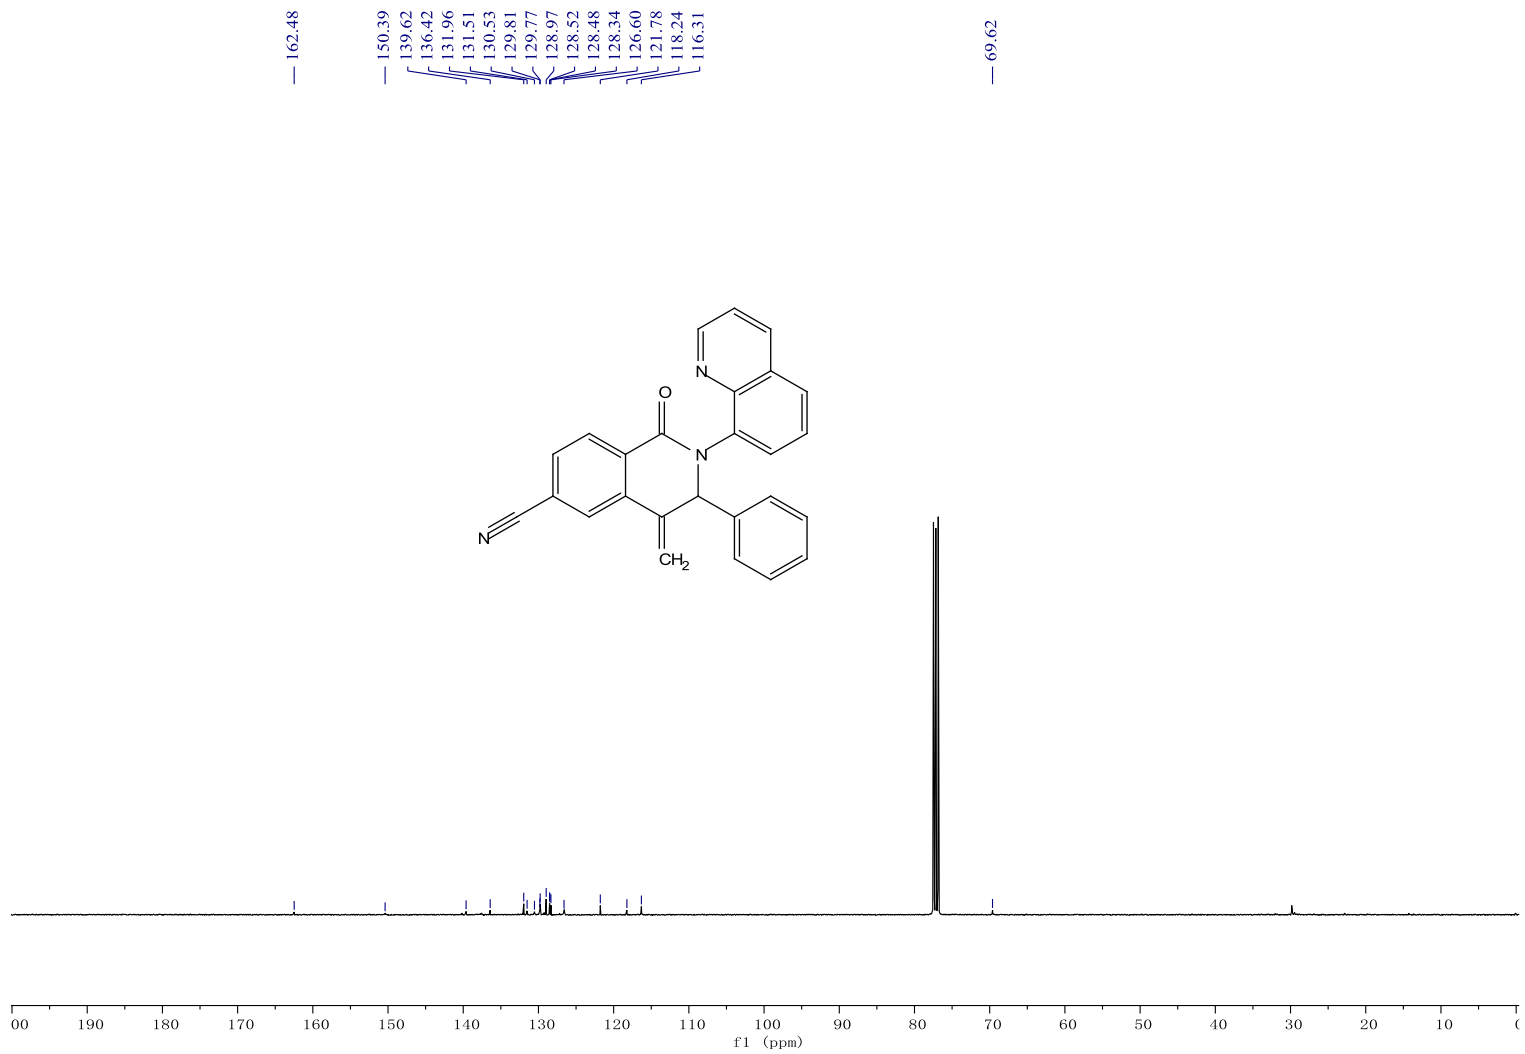

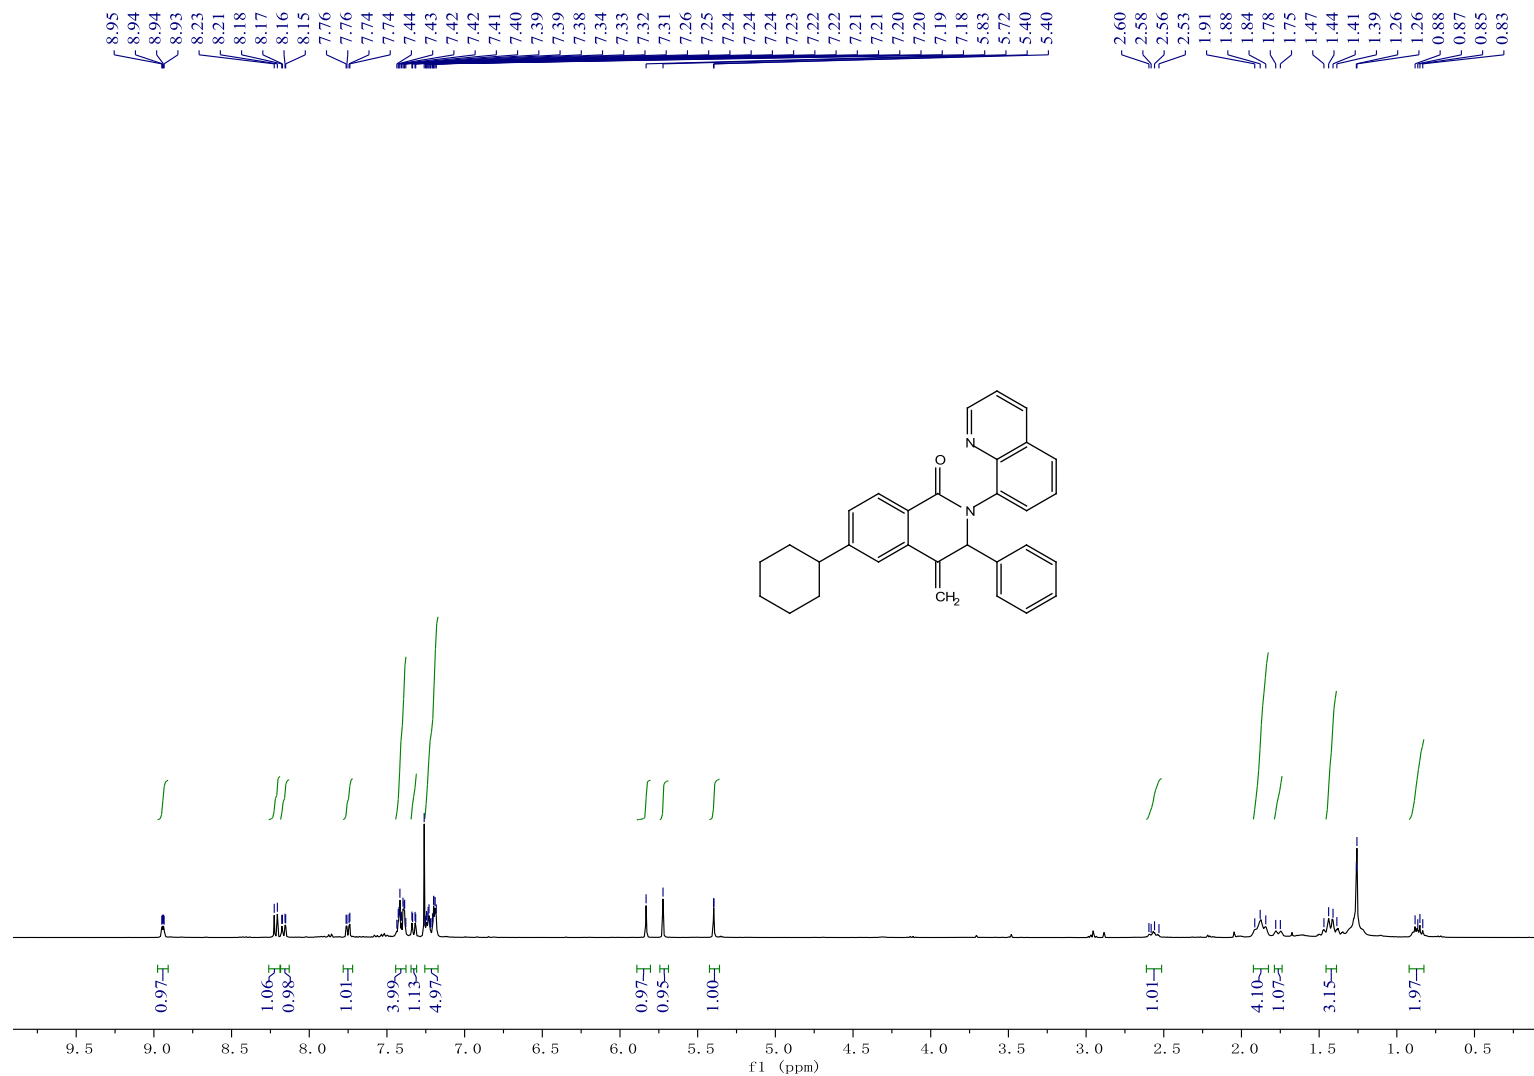

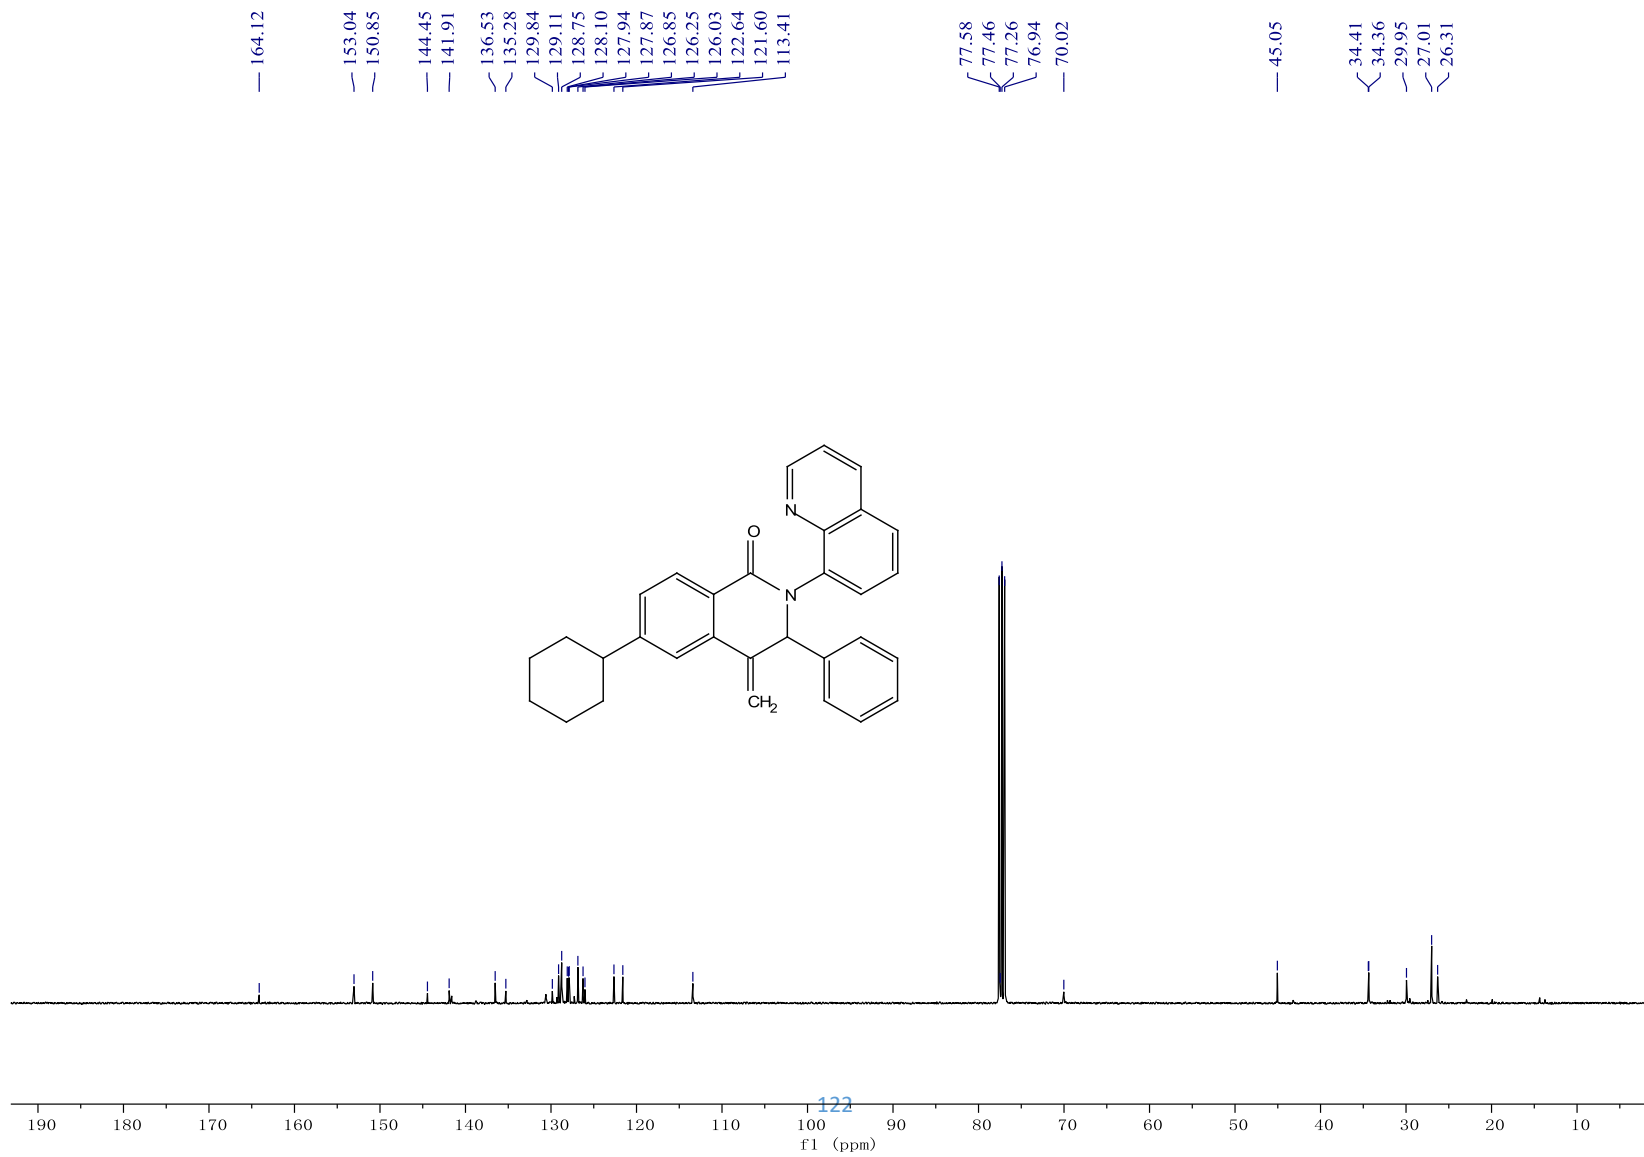

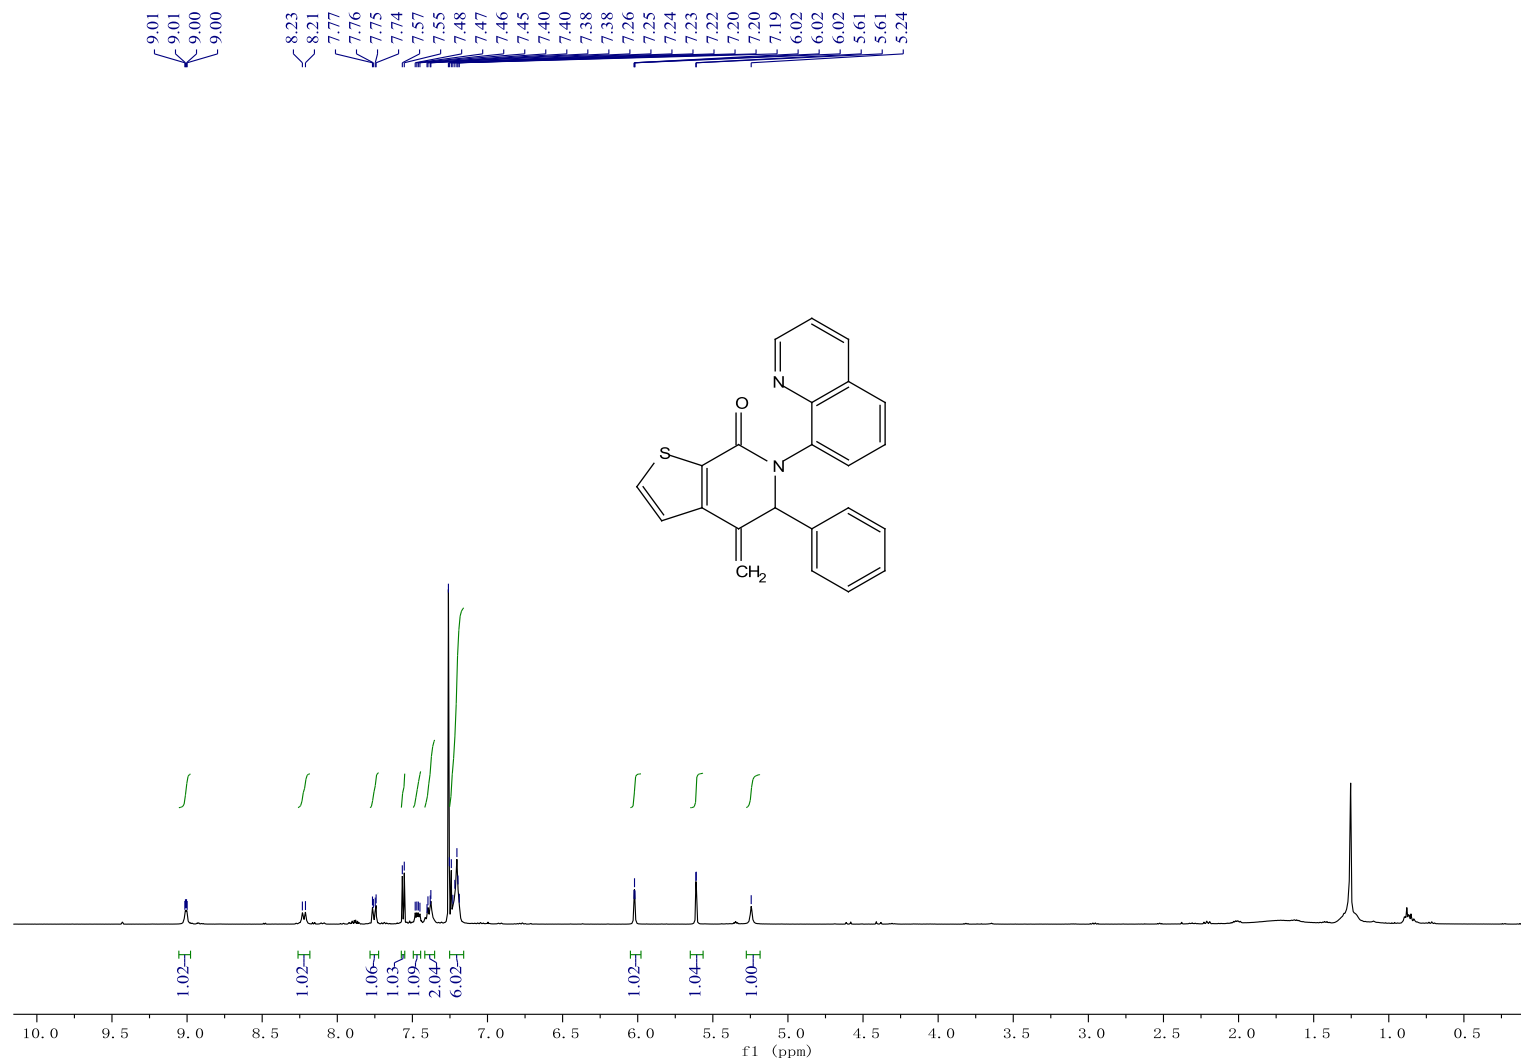

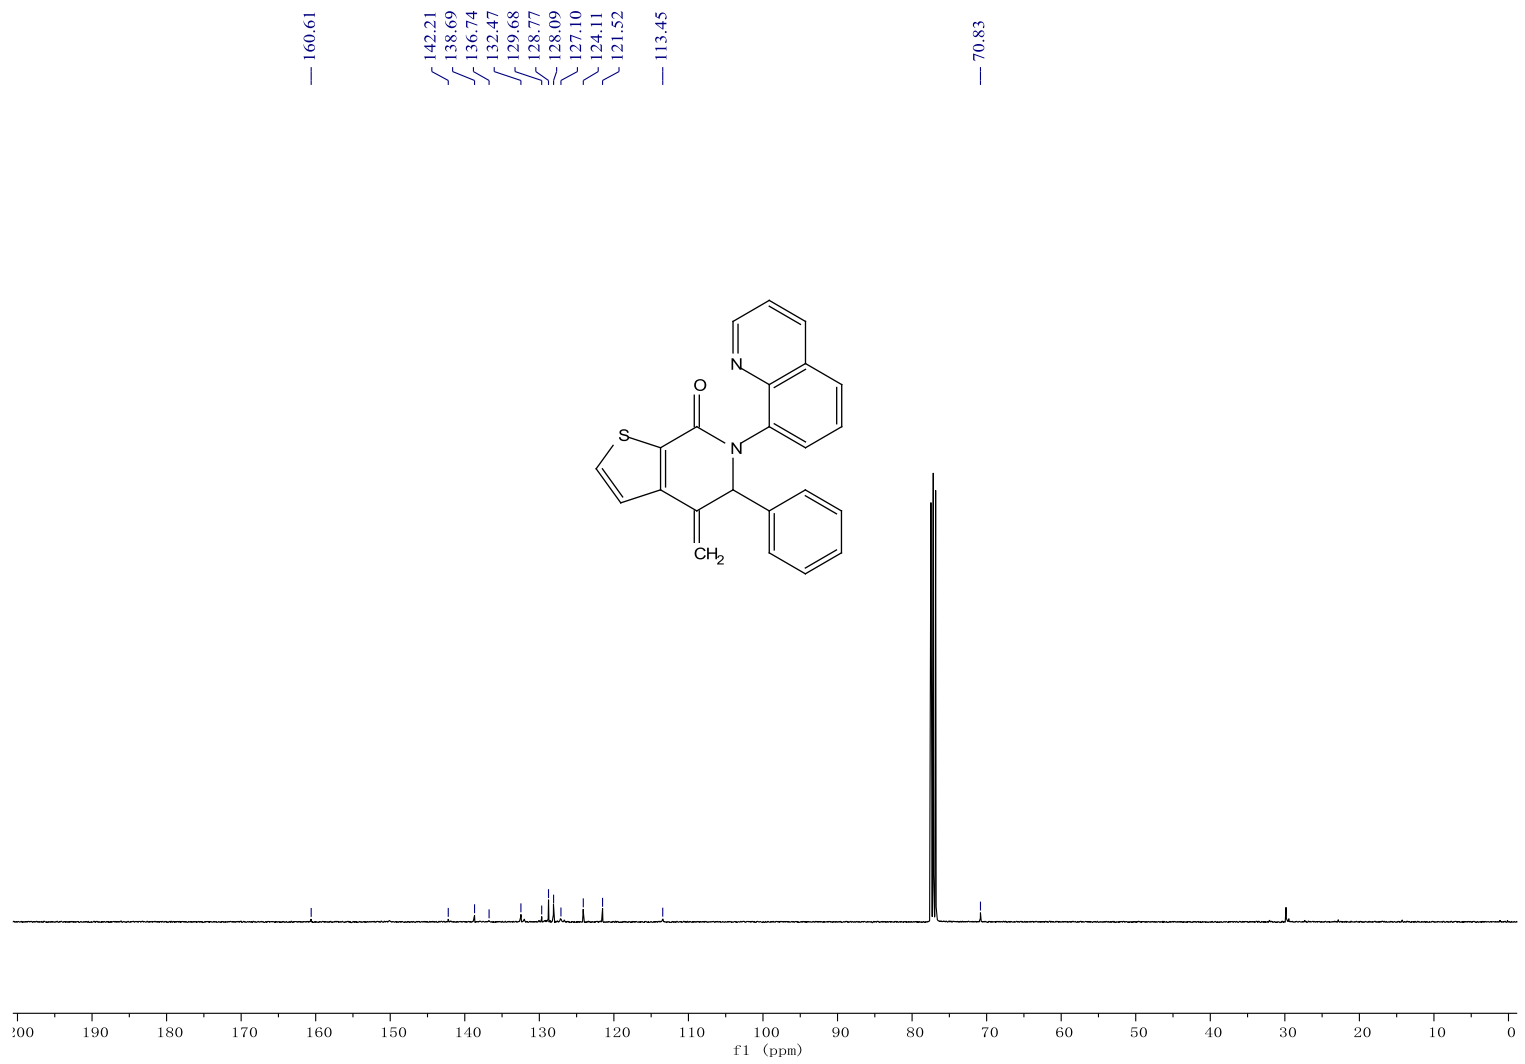



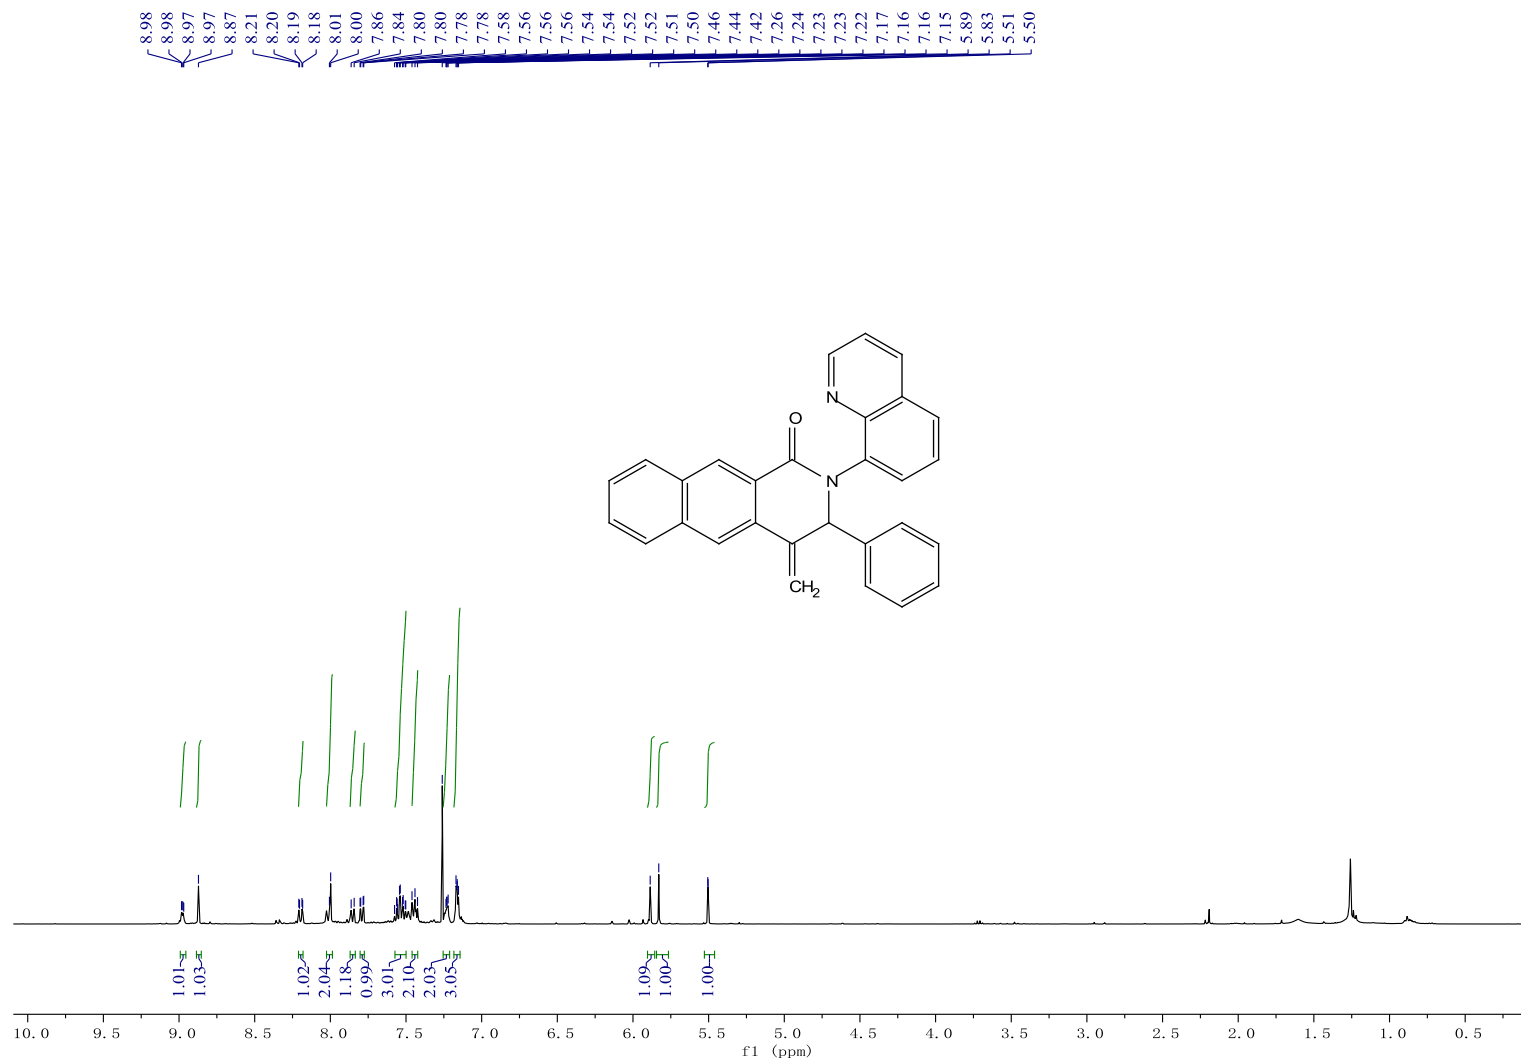

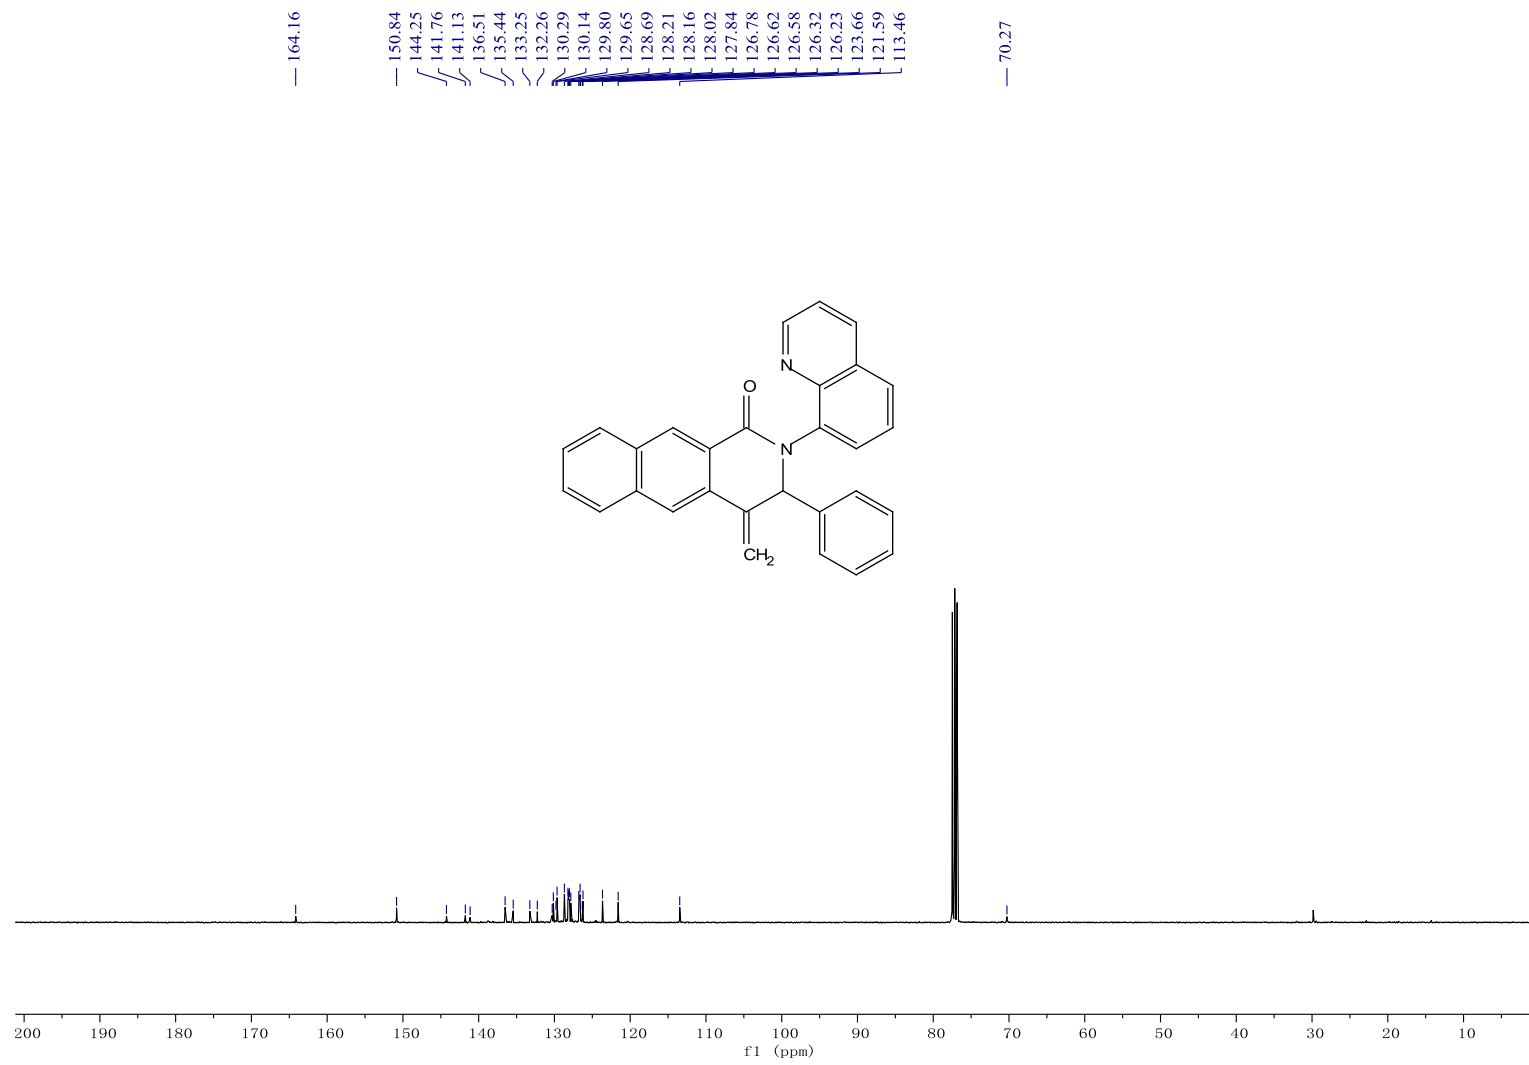

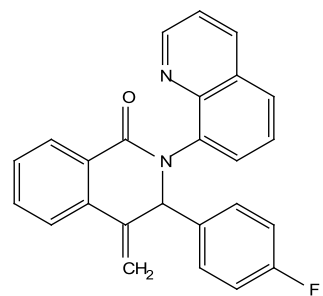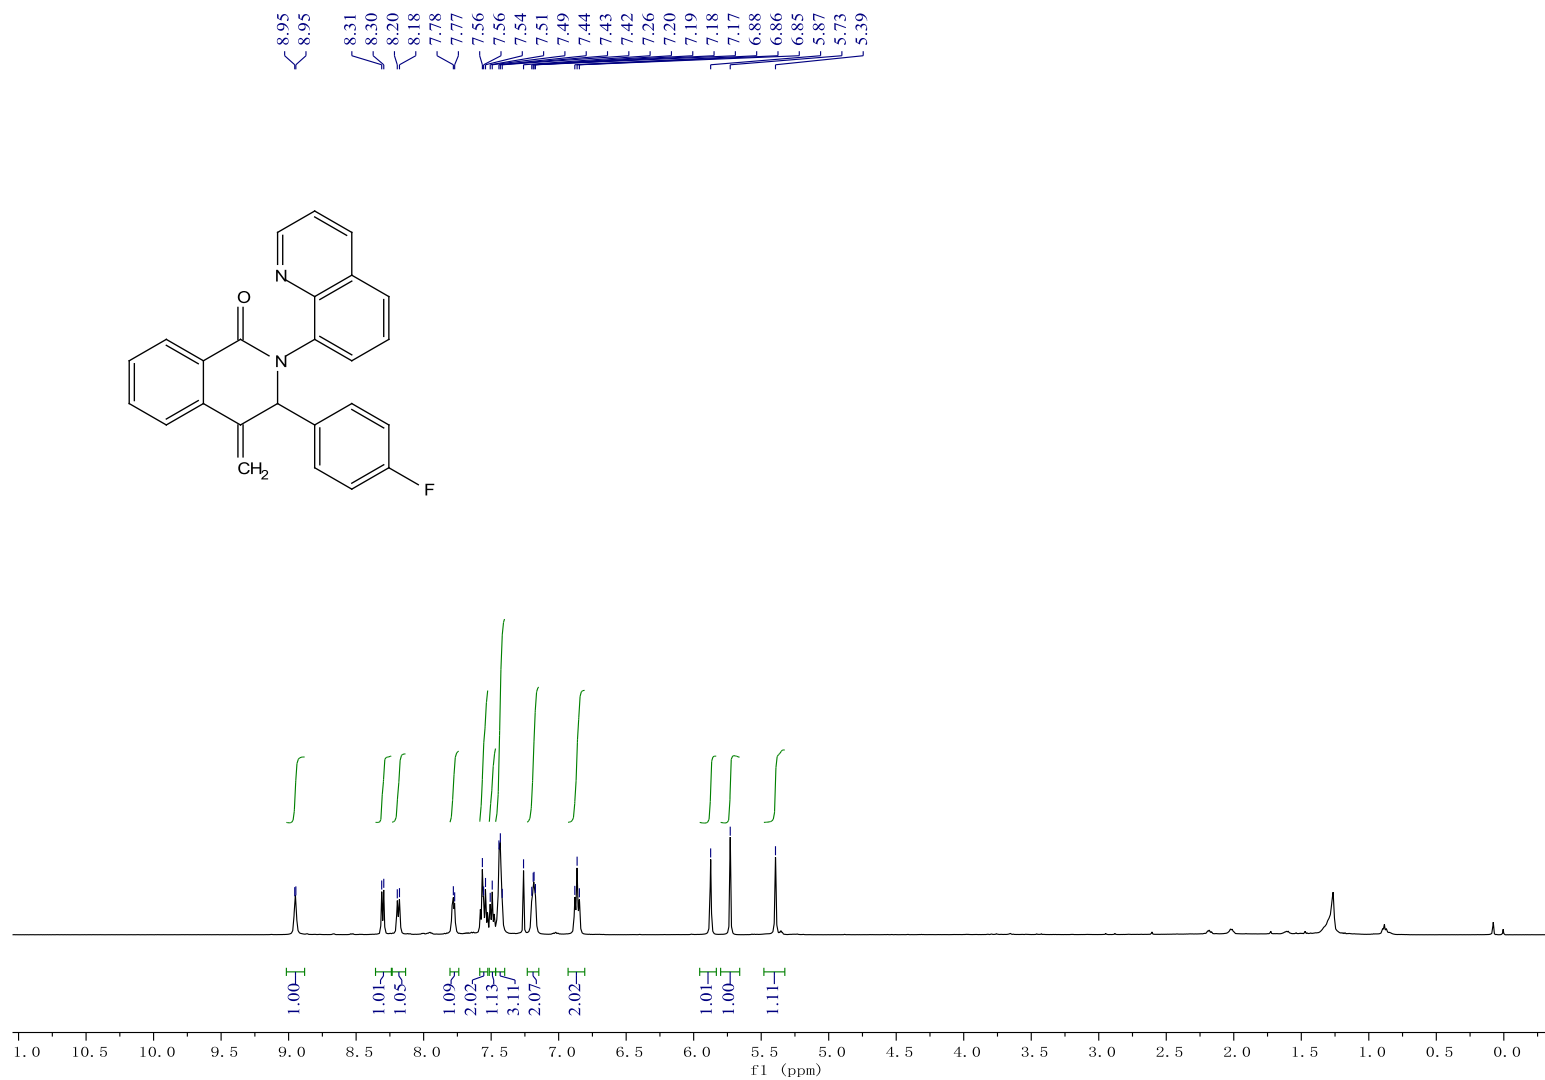

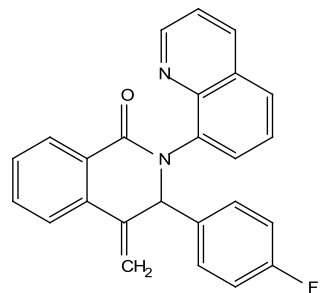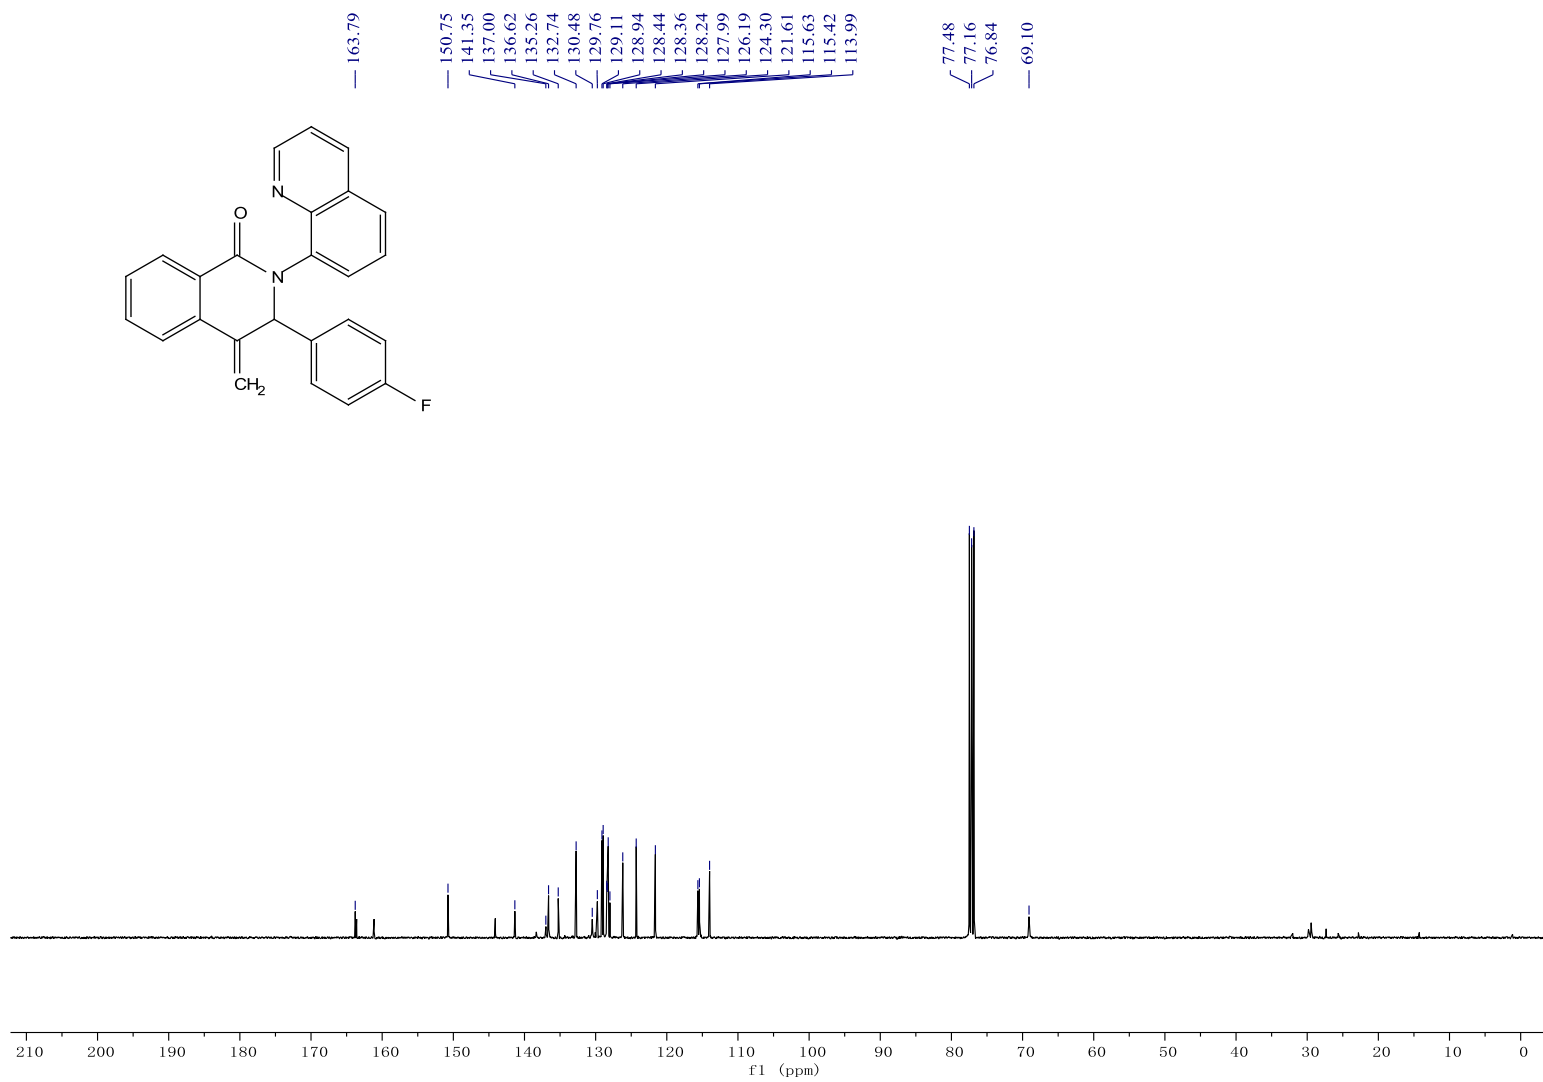

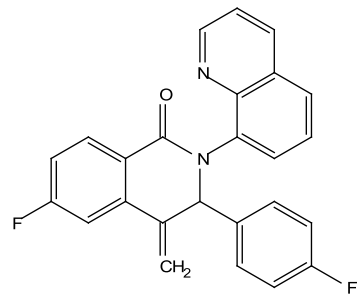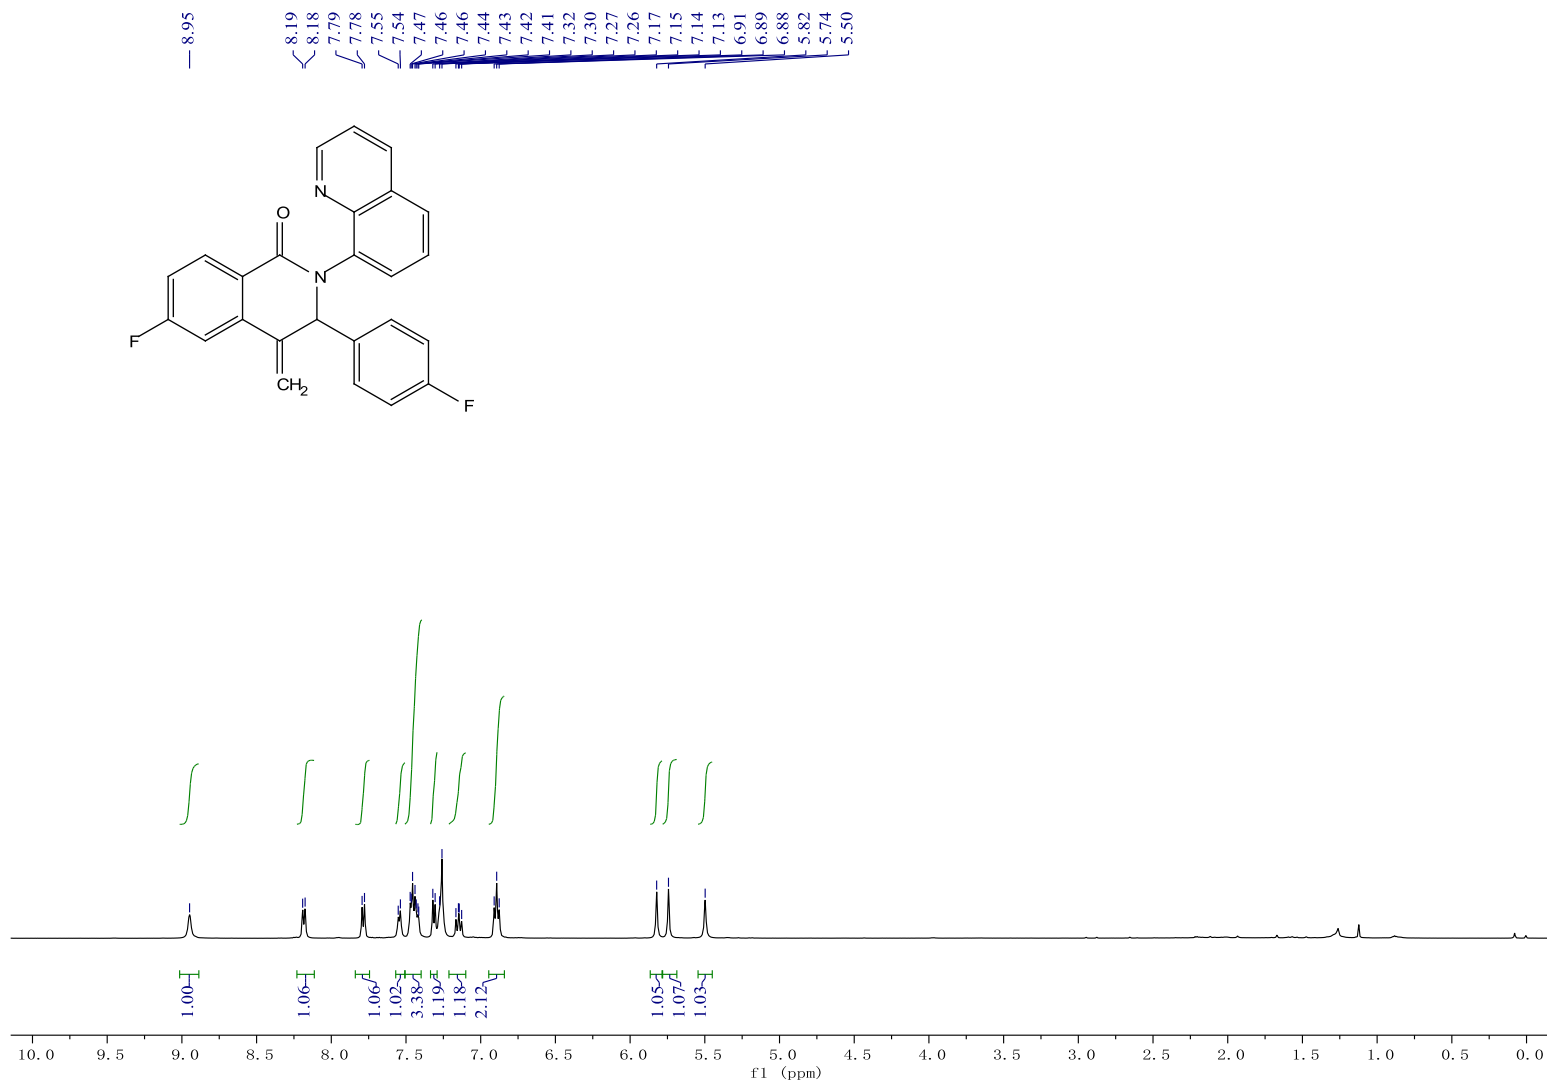



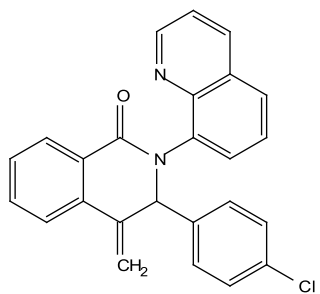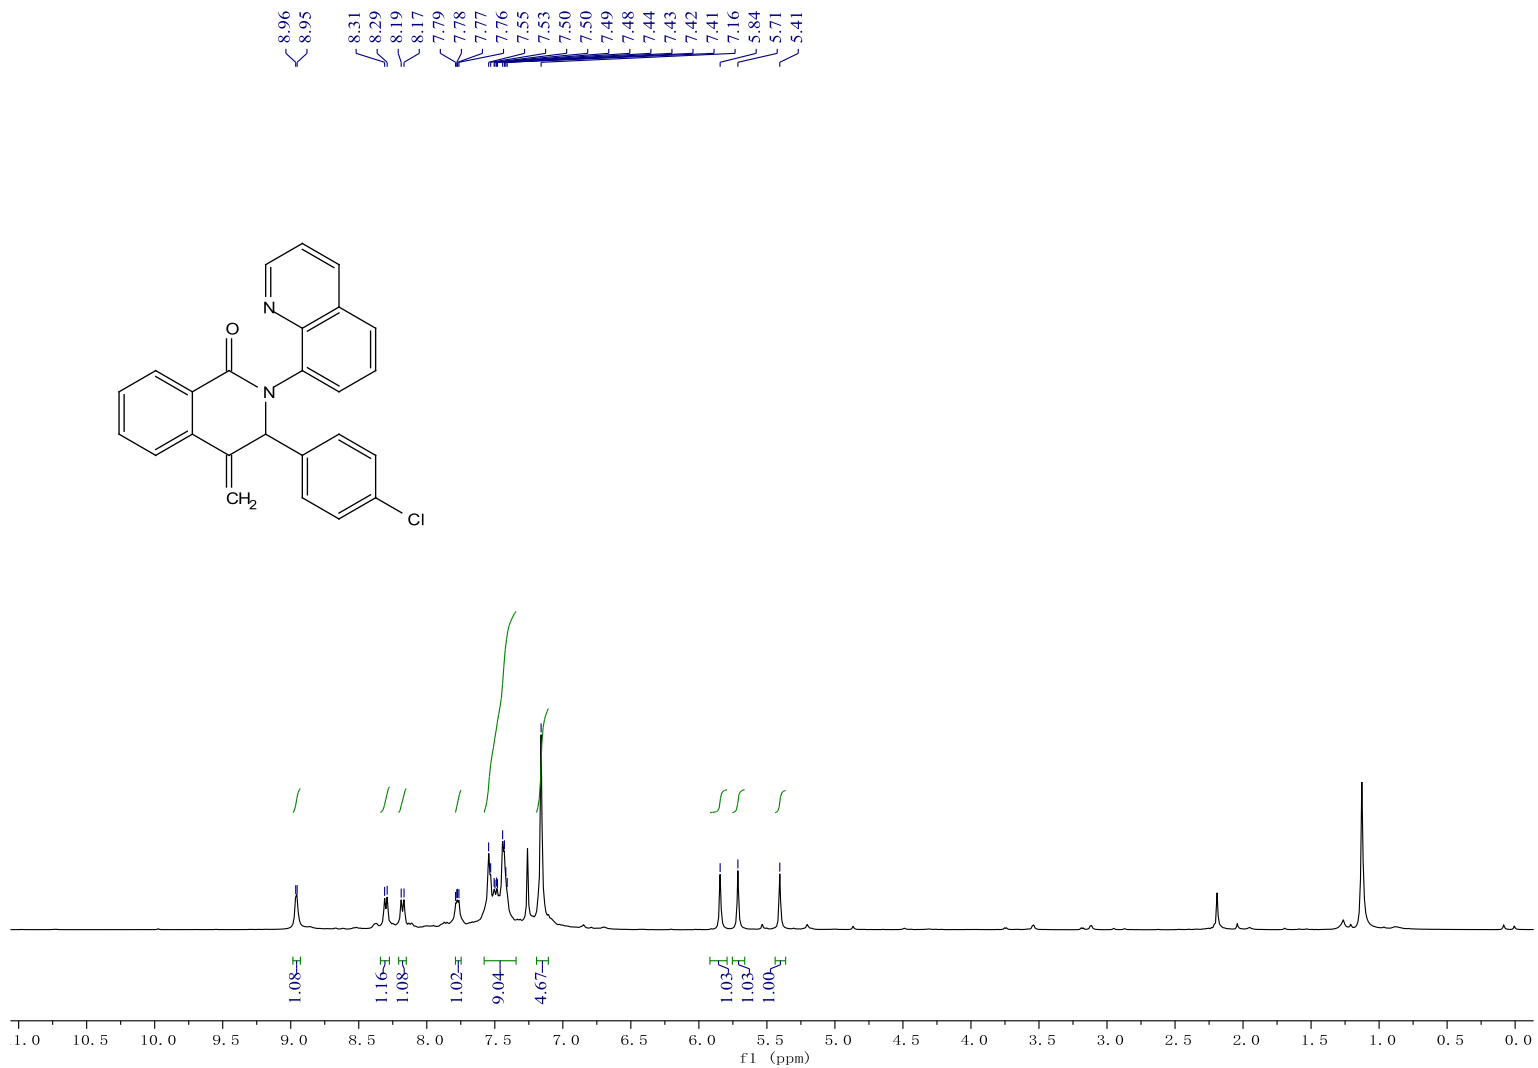

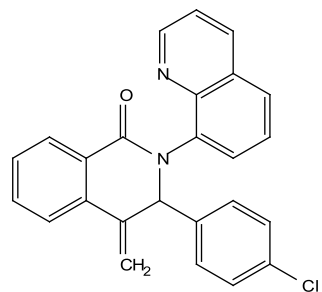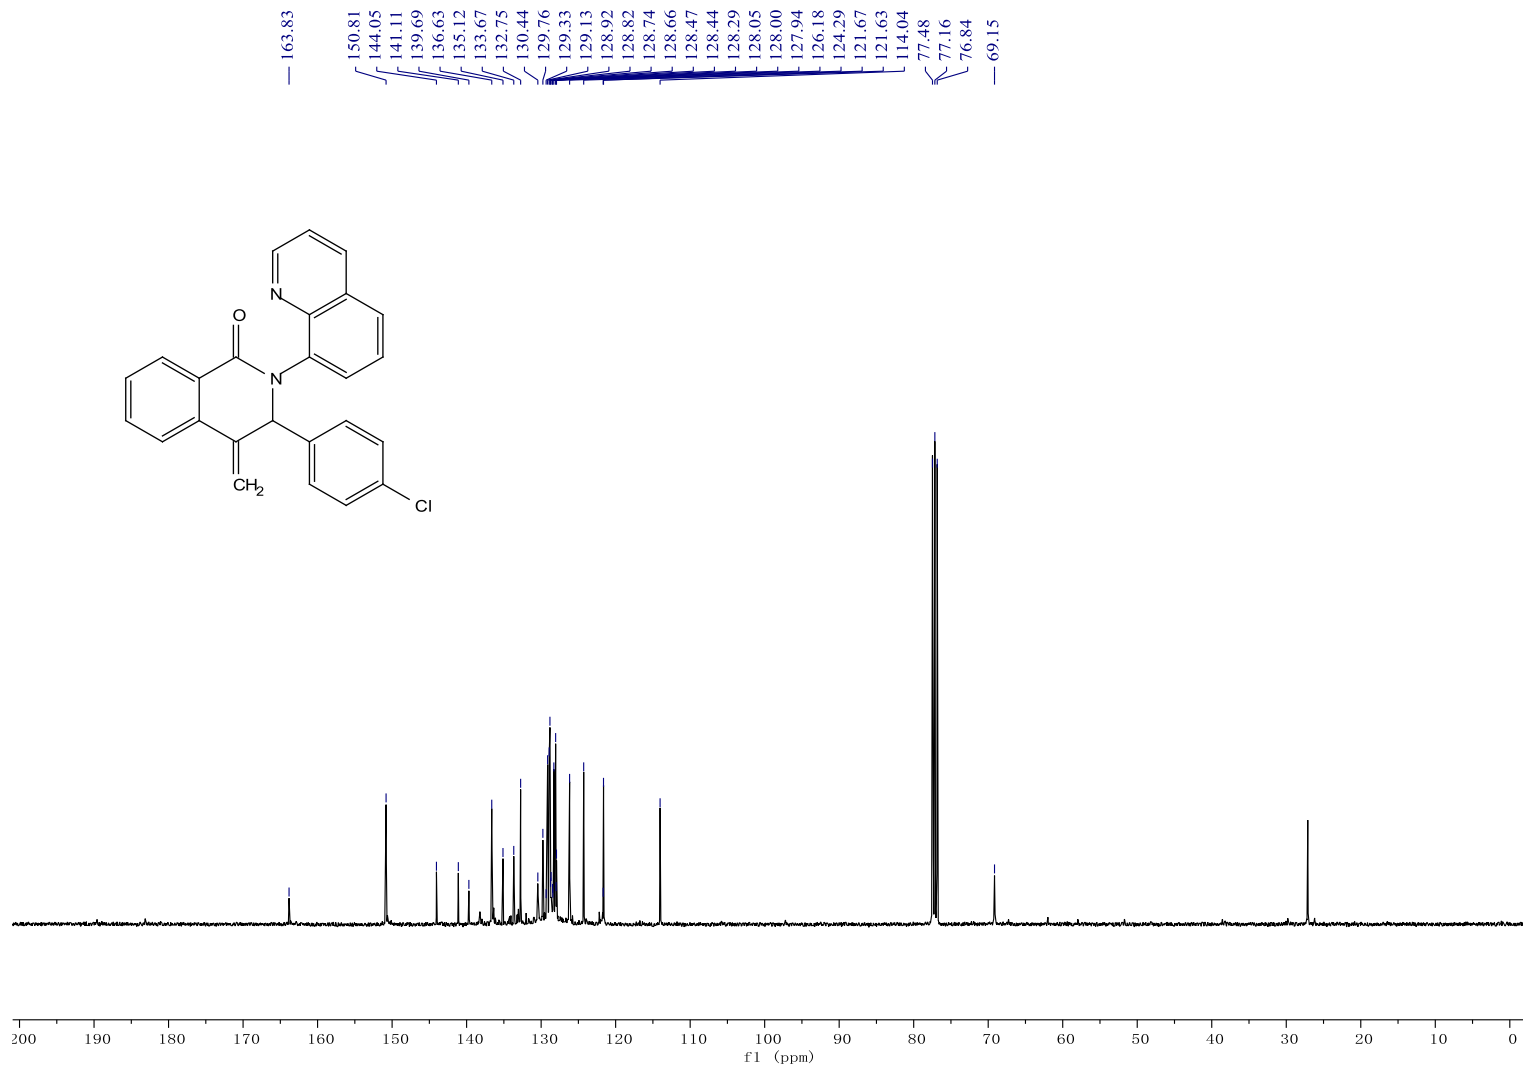



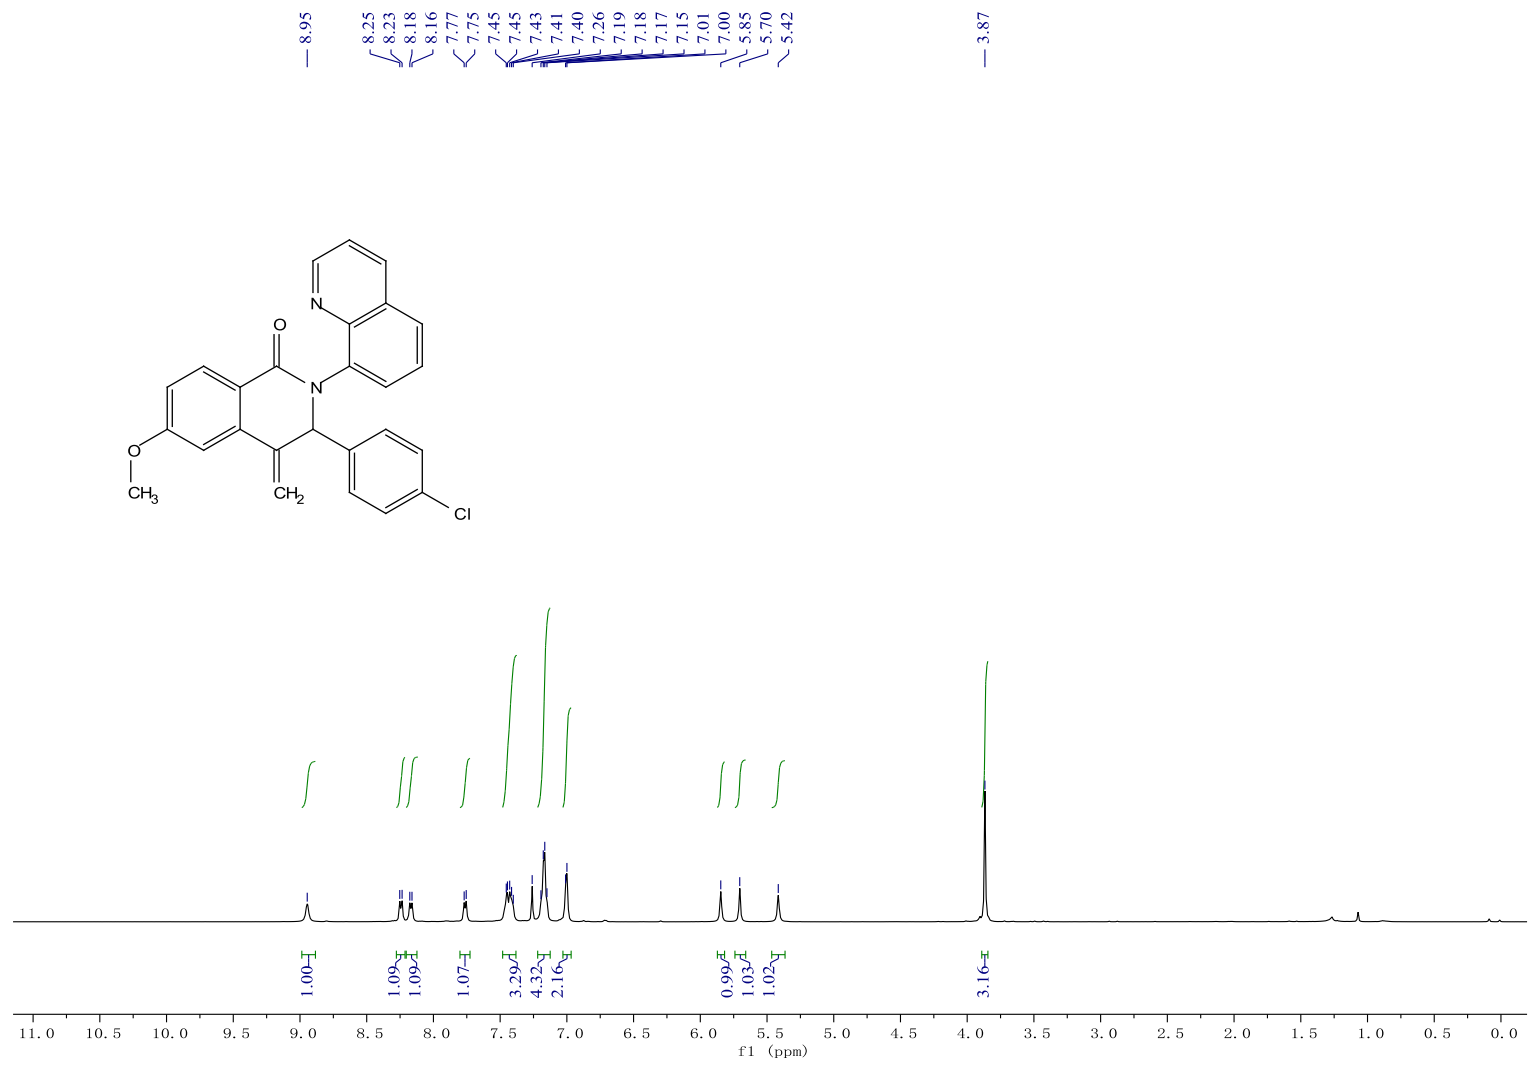

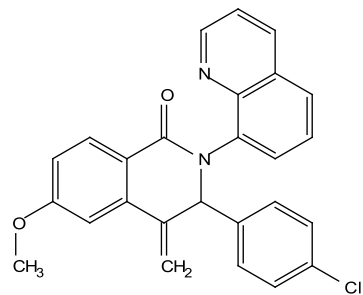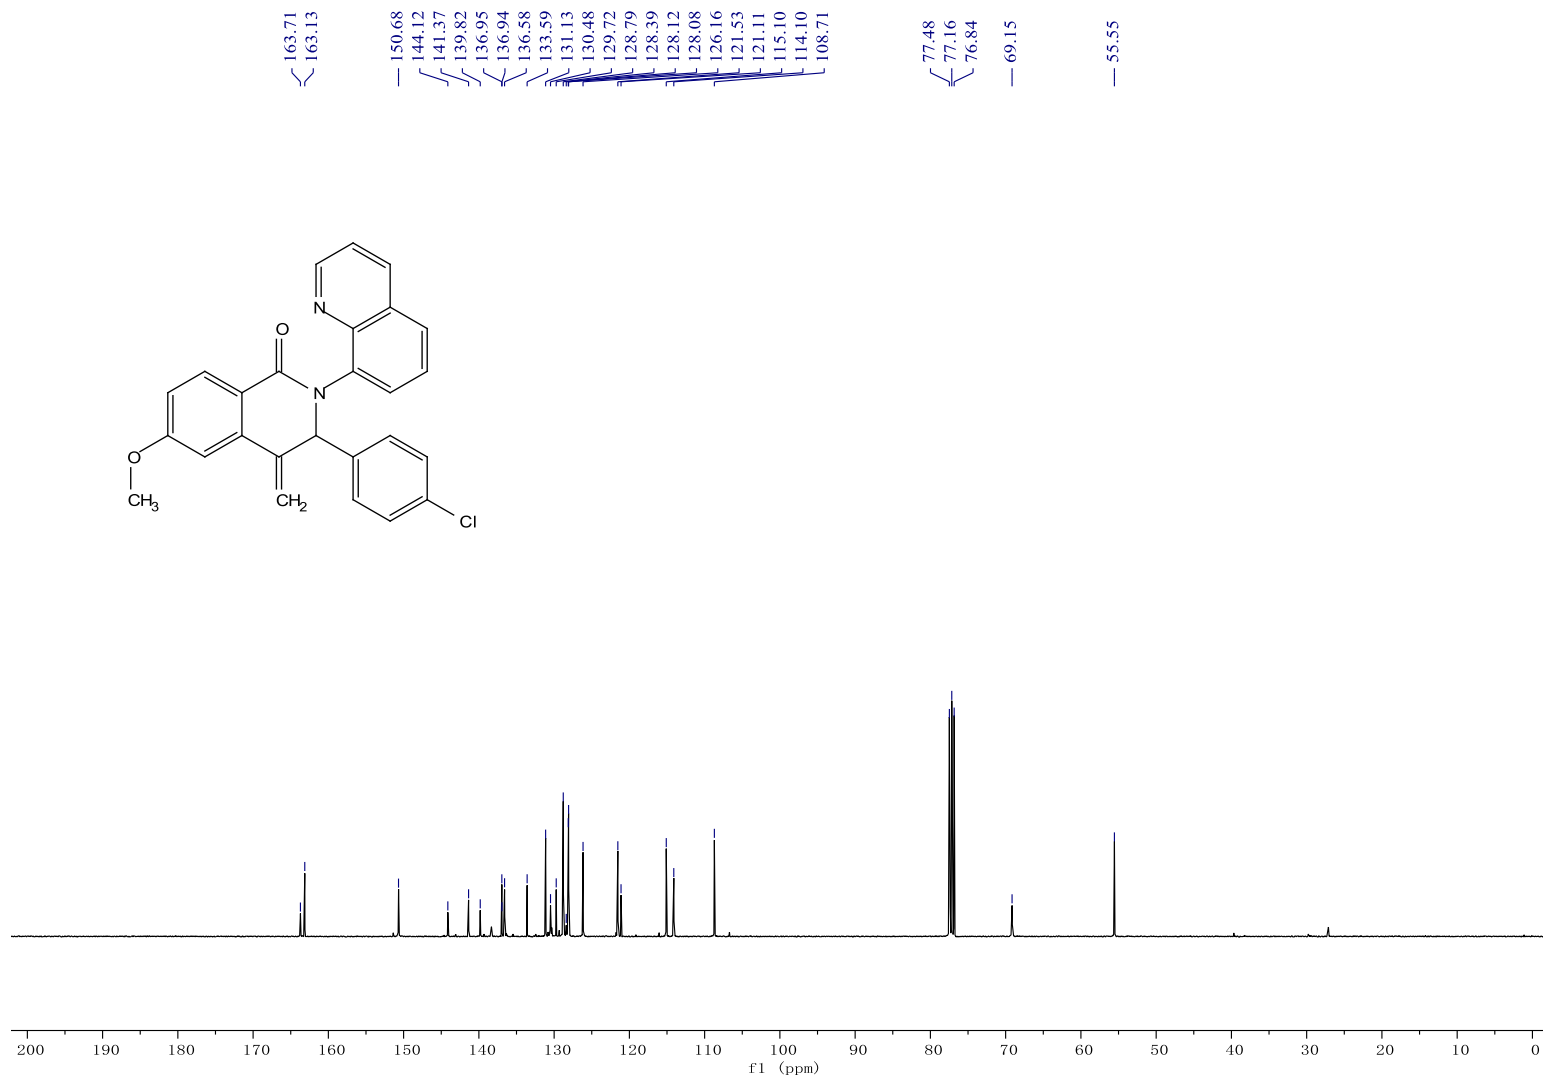

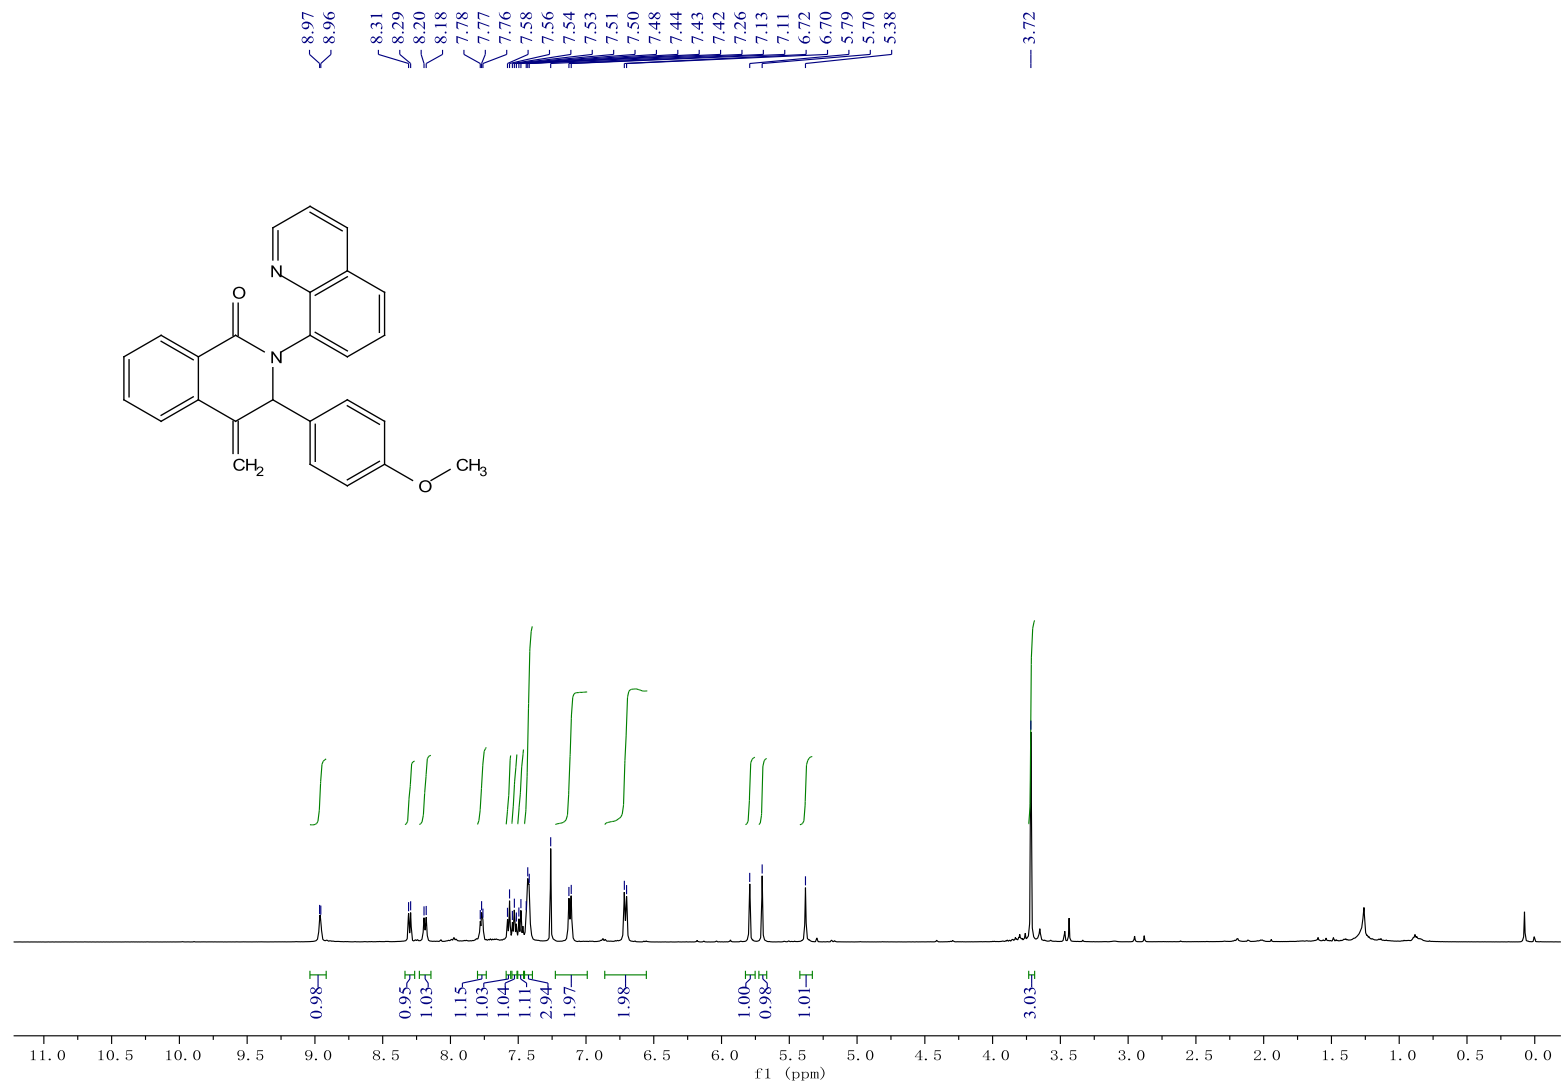

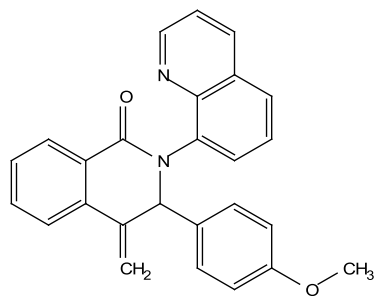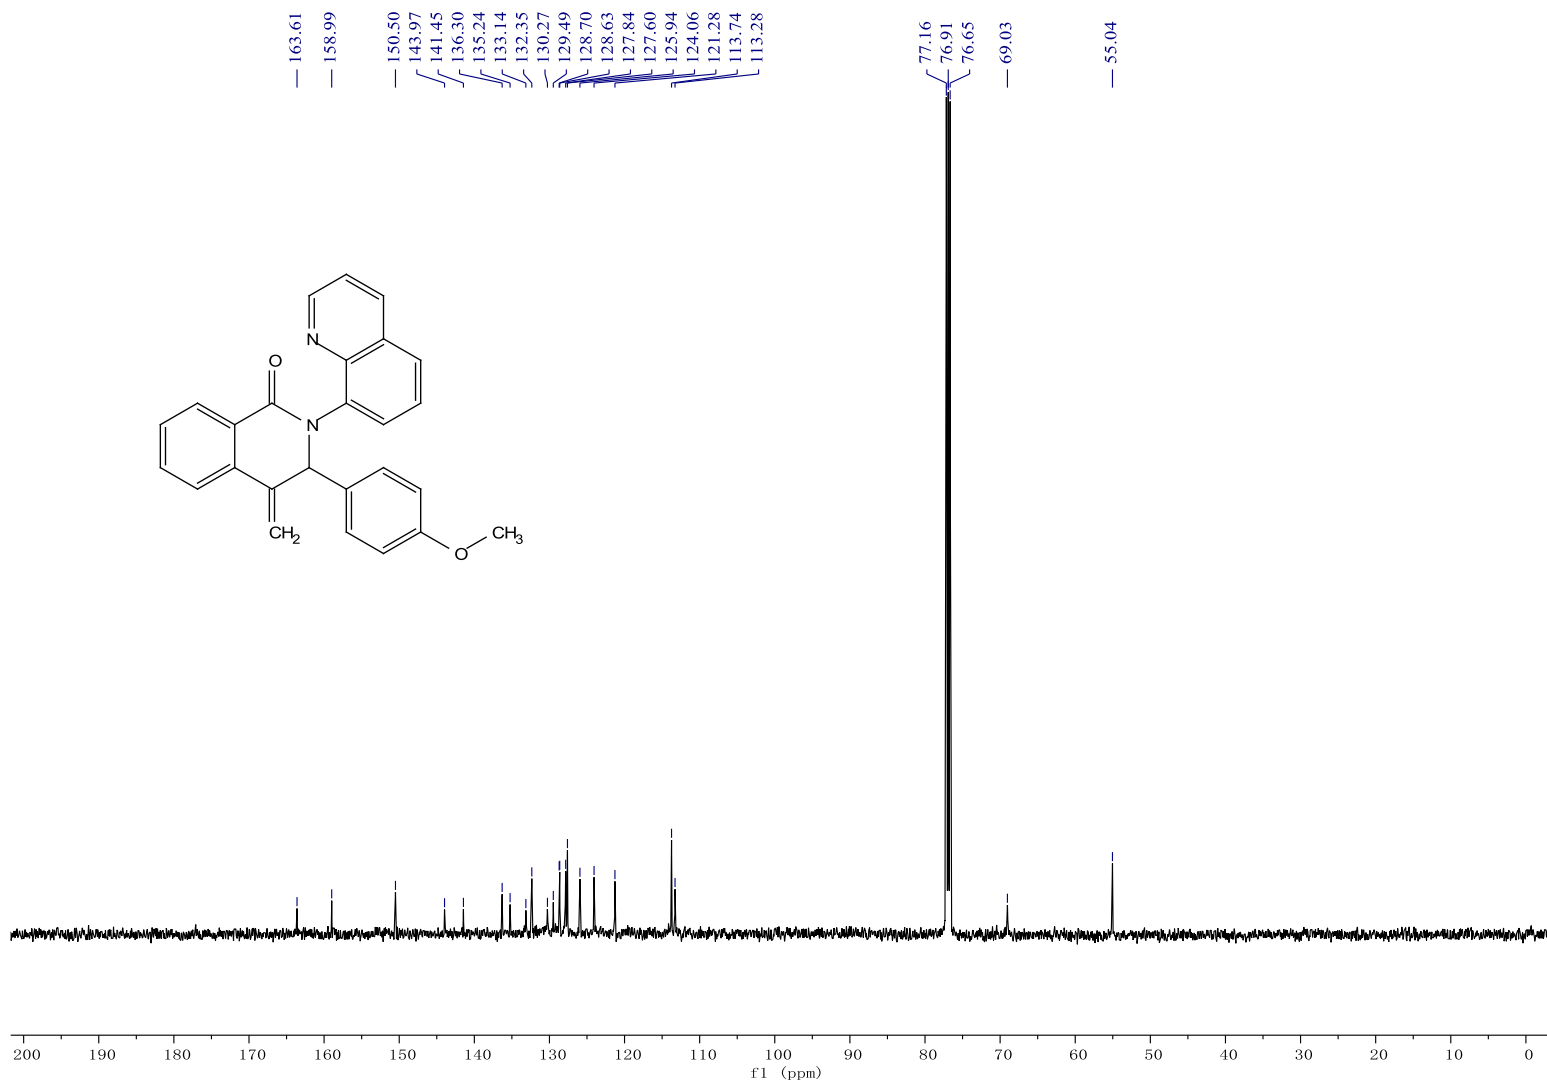

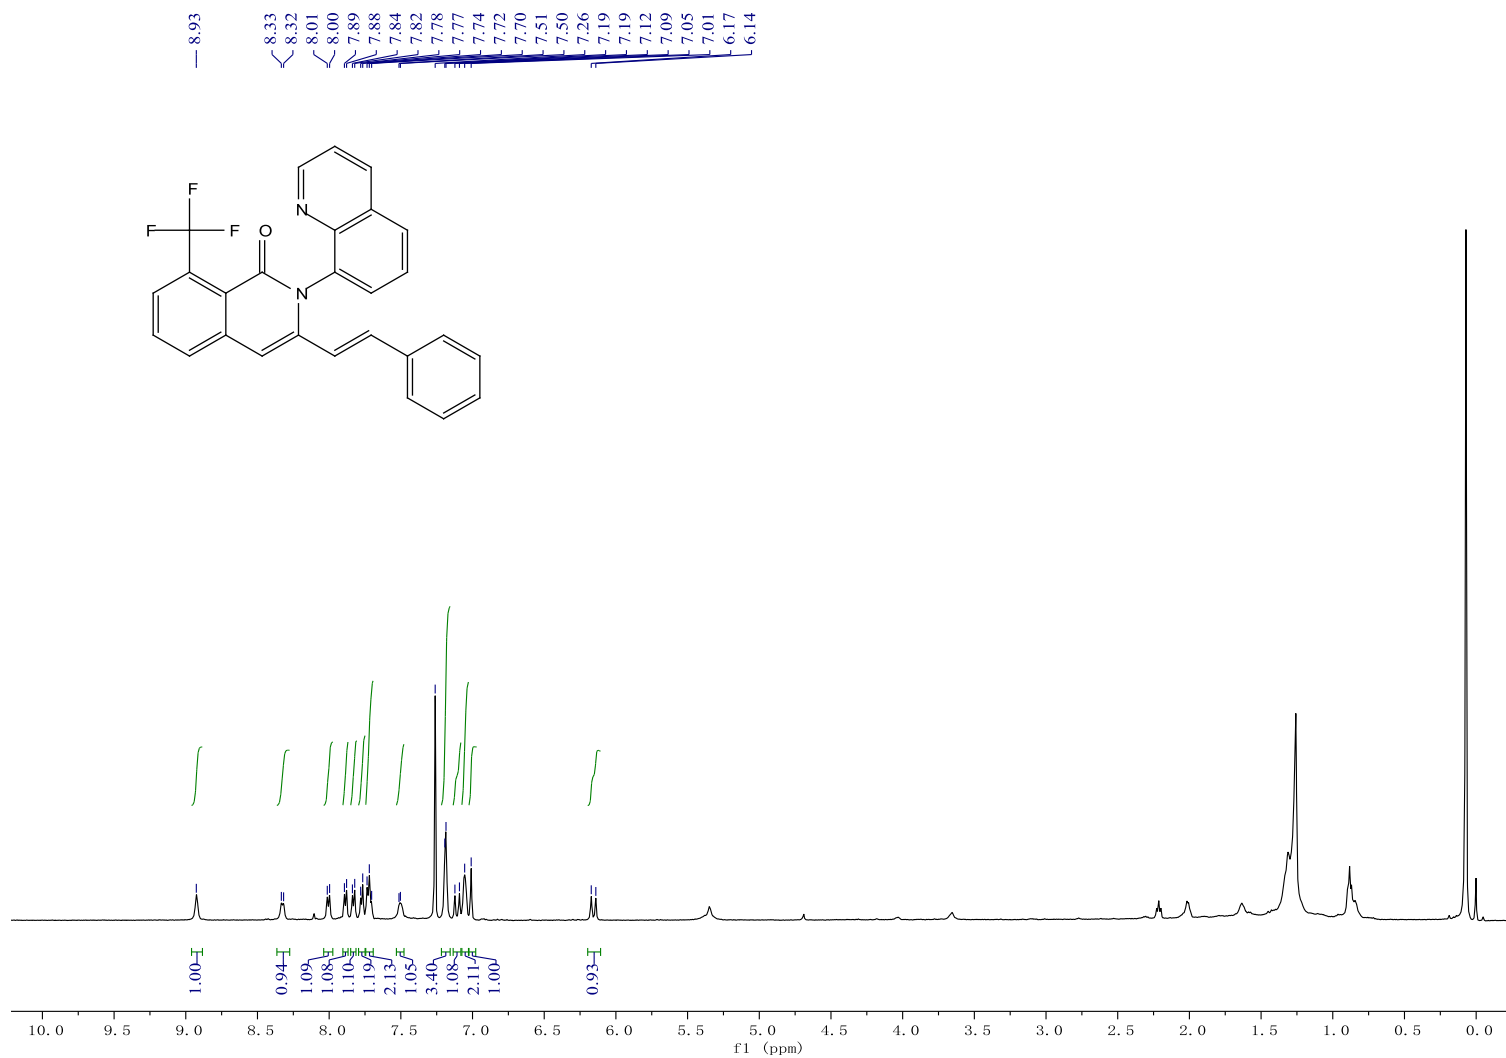

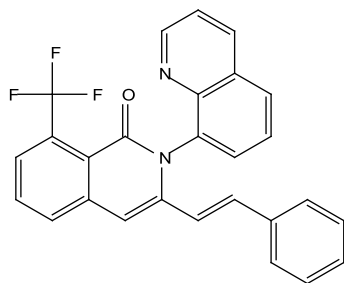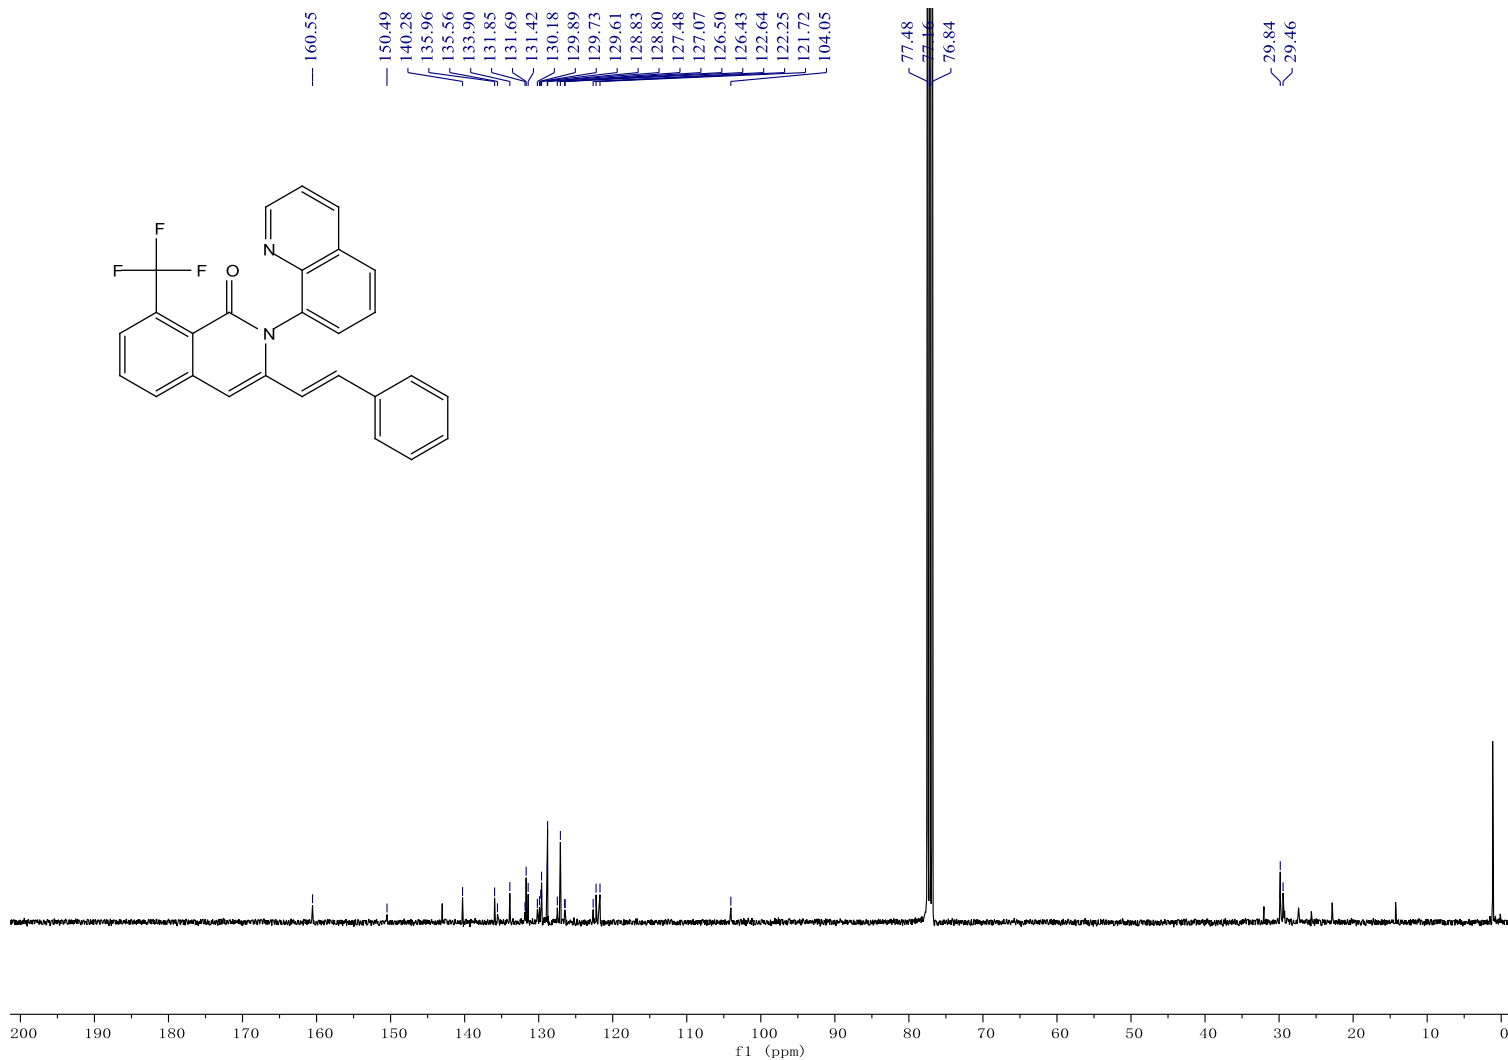

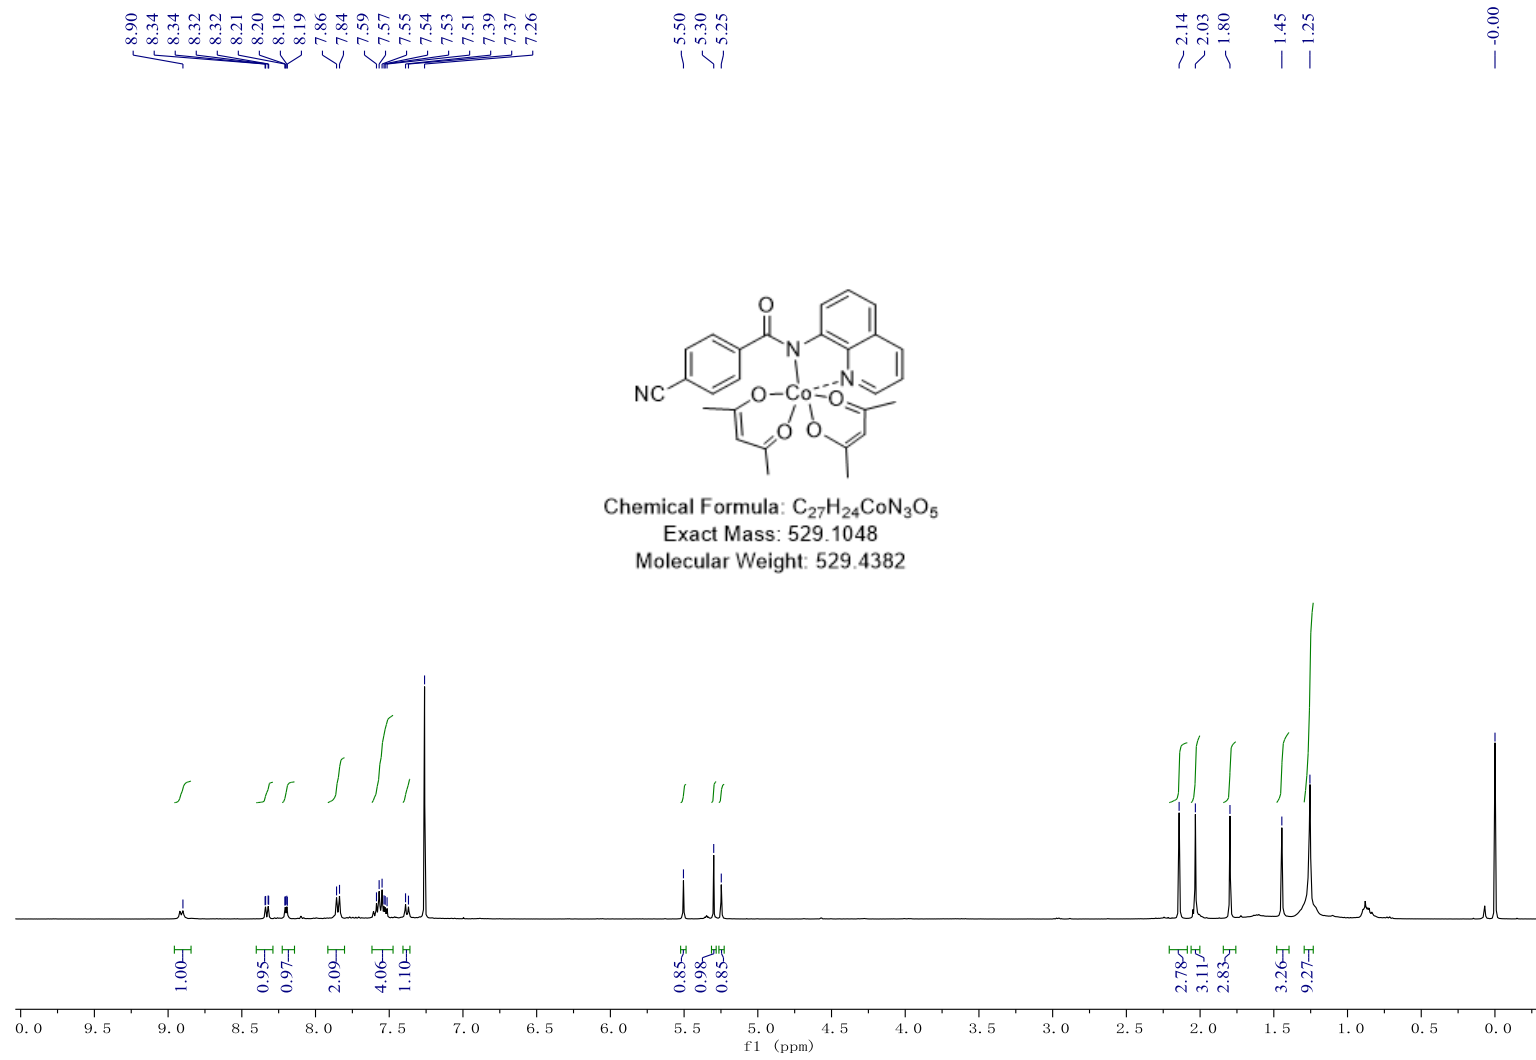

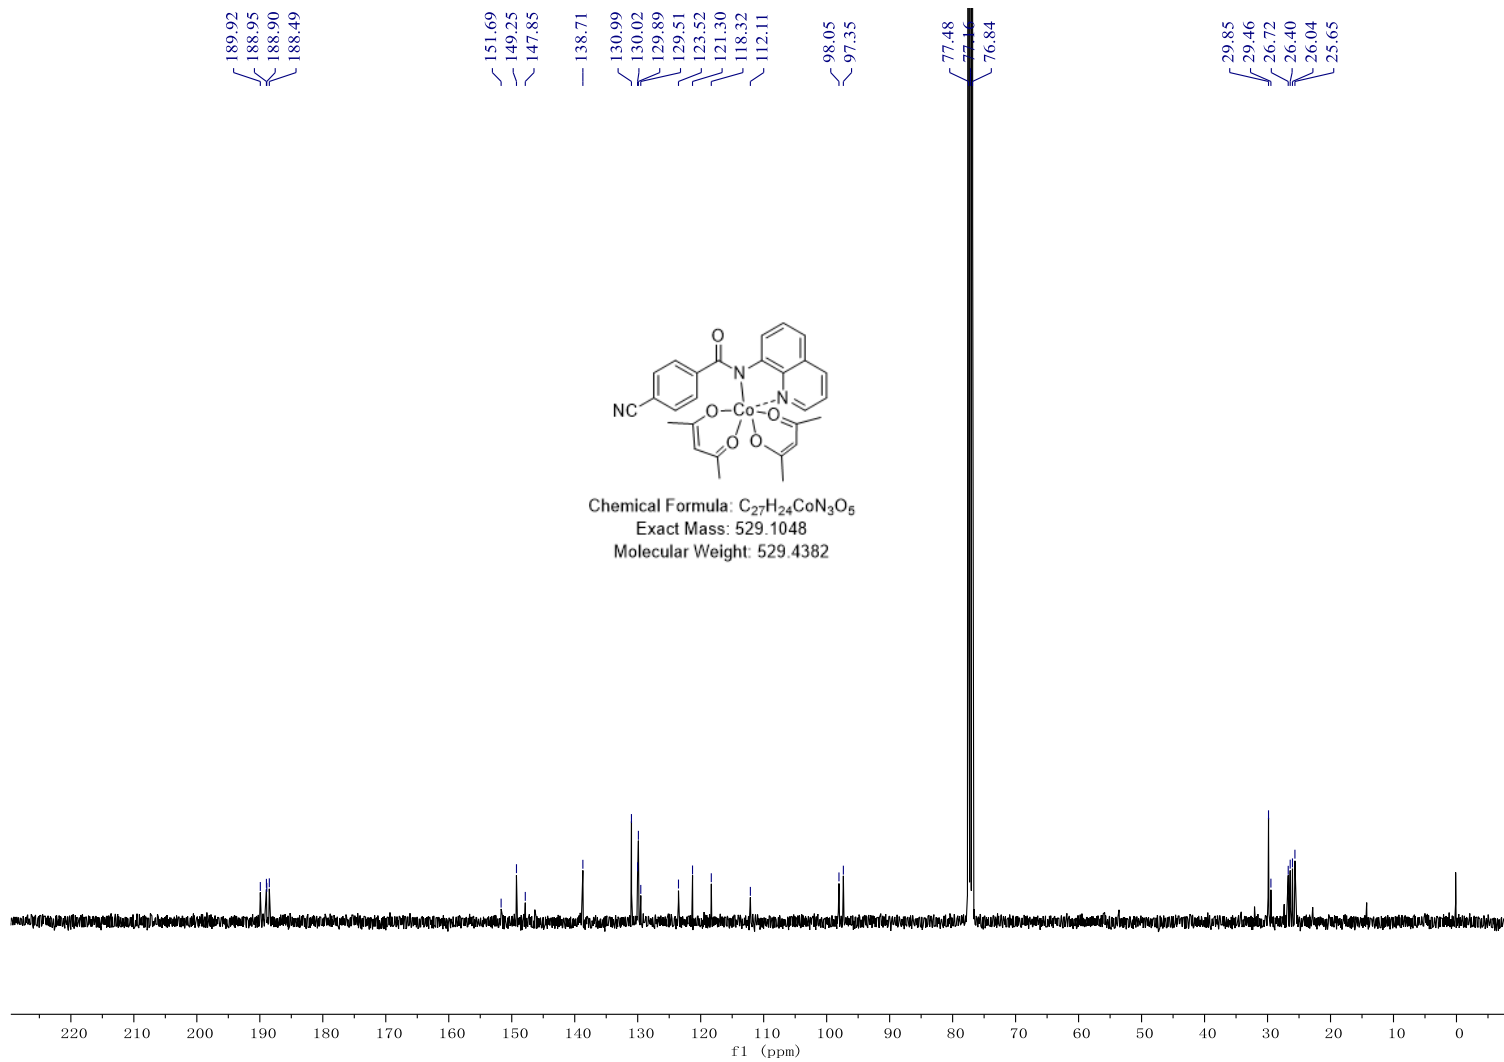



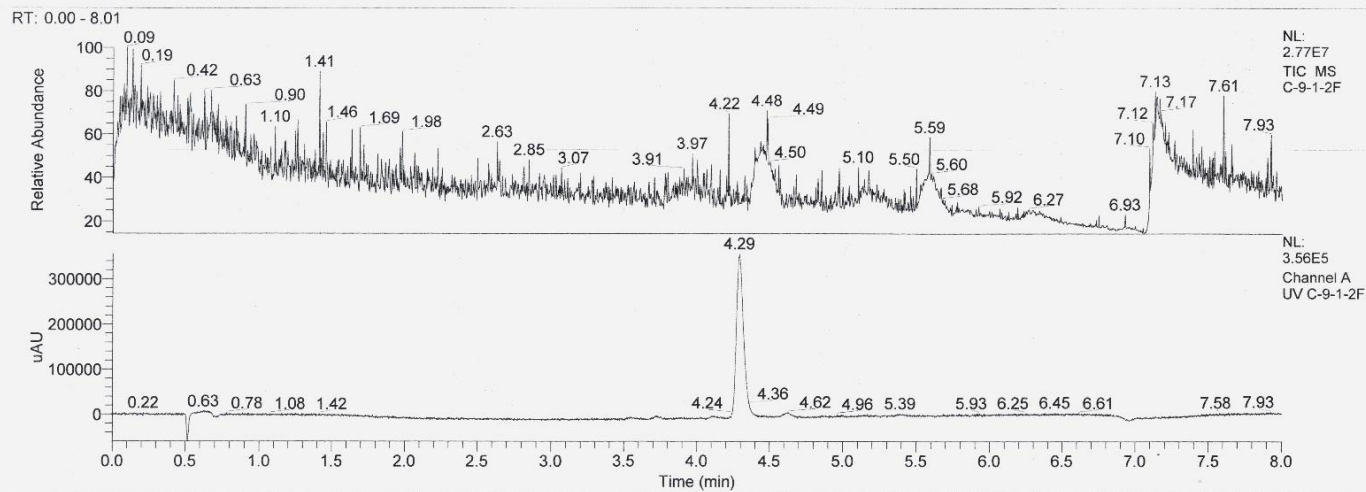

C-9-1-2F #1195 RT: 4.44 AV: 1 NL: 3.03E6  
T: FTMS + c ESI Full ms [100.0000-1000.0000]

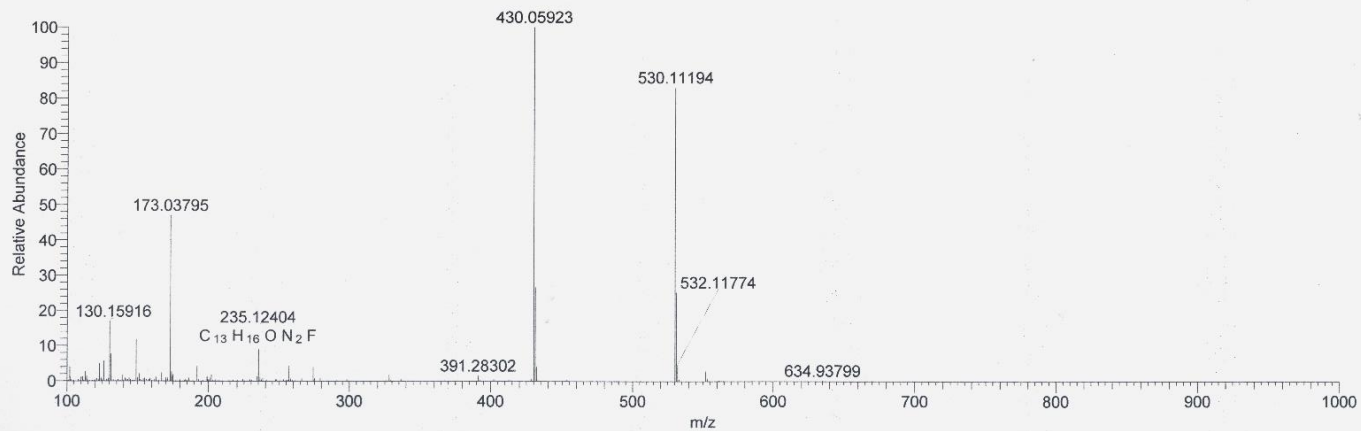

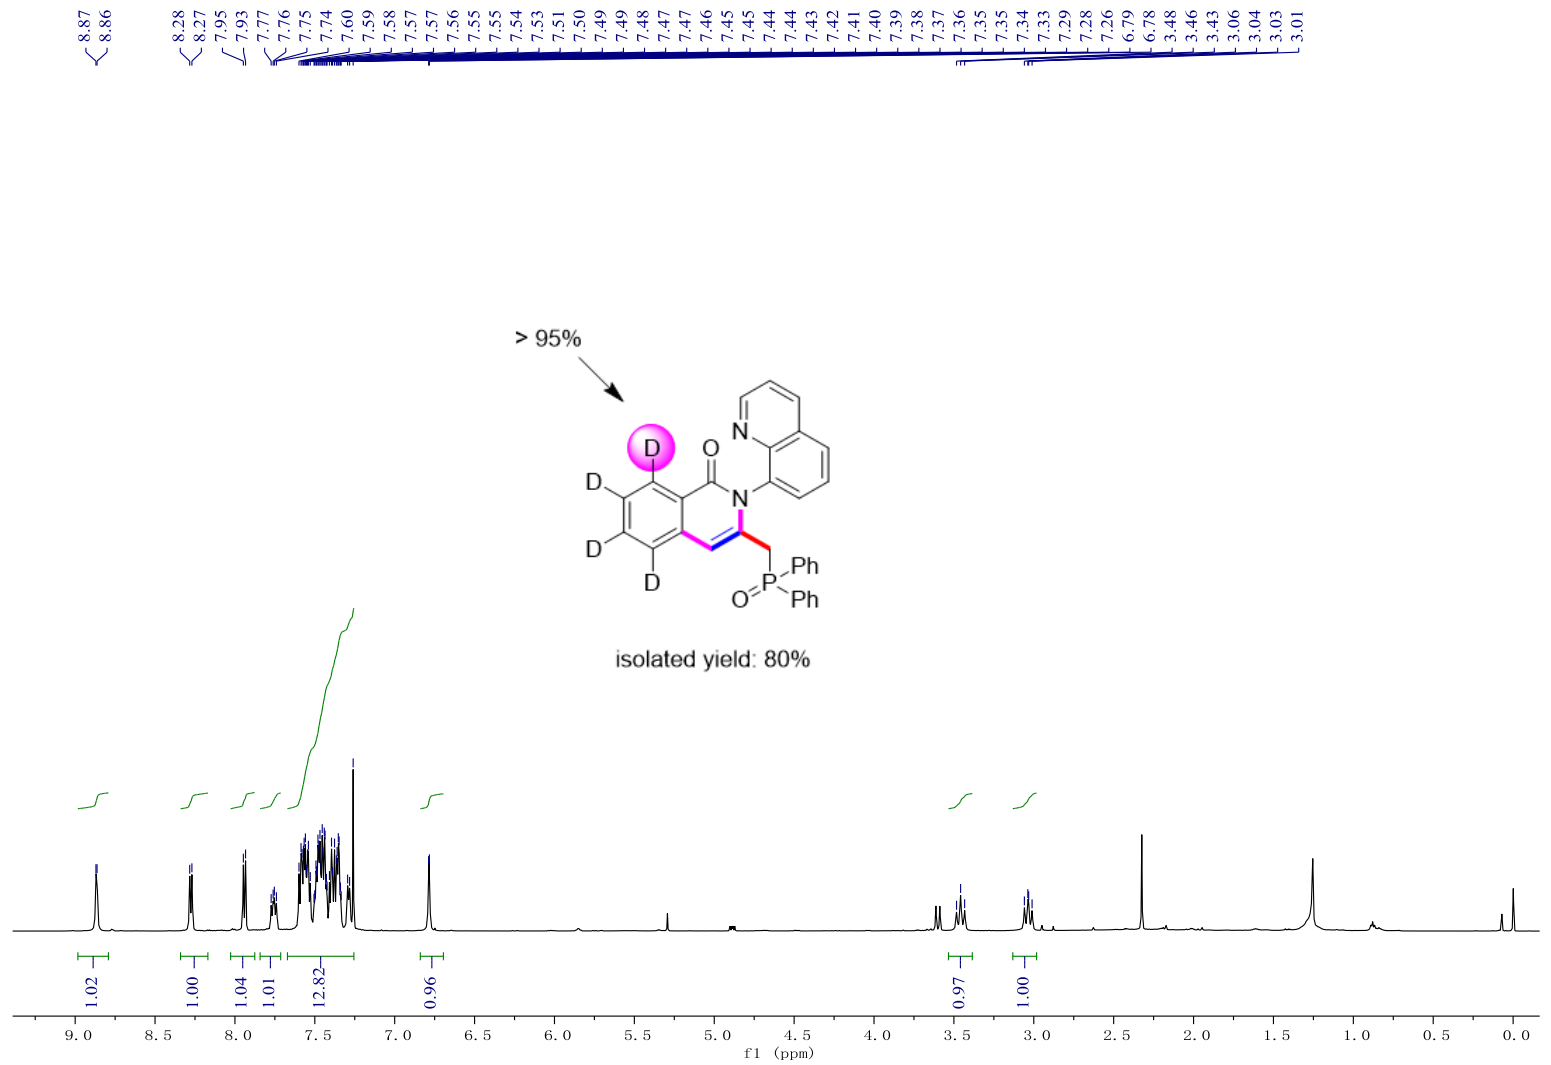

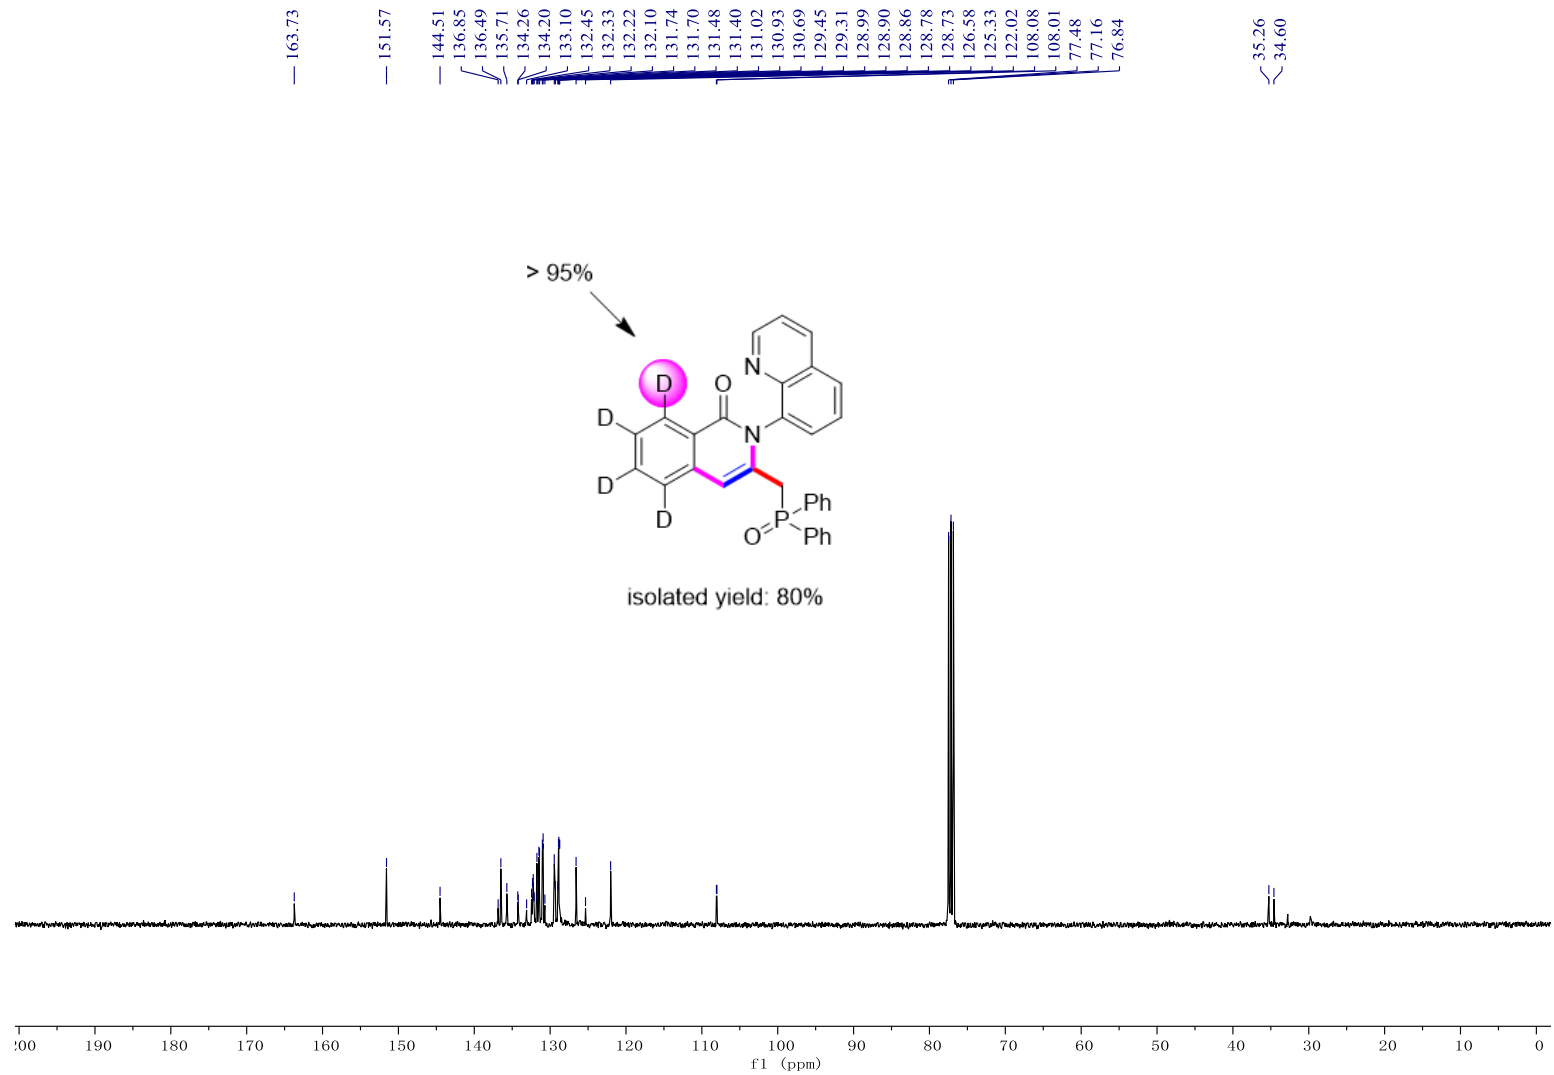

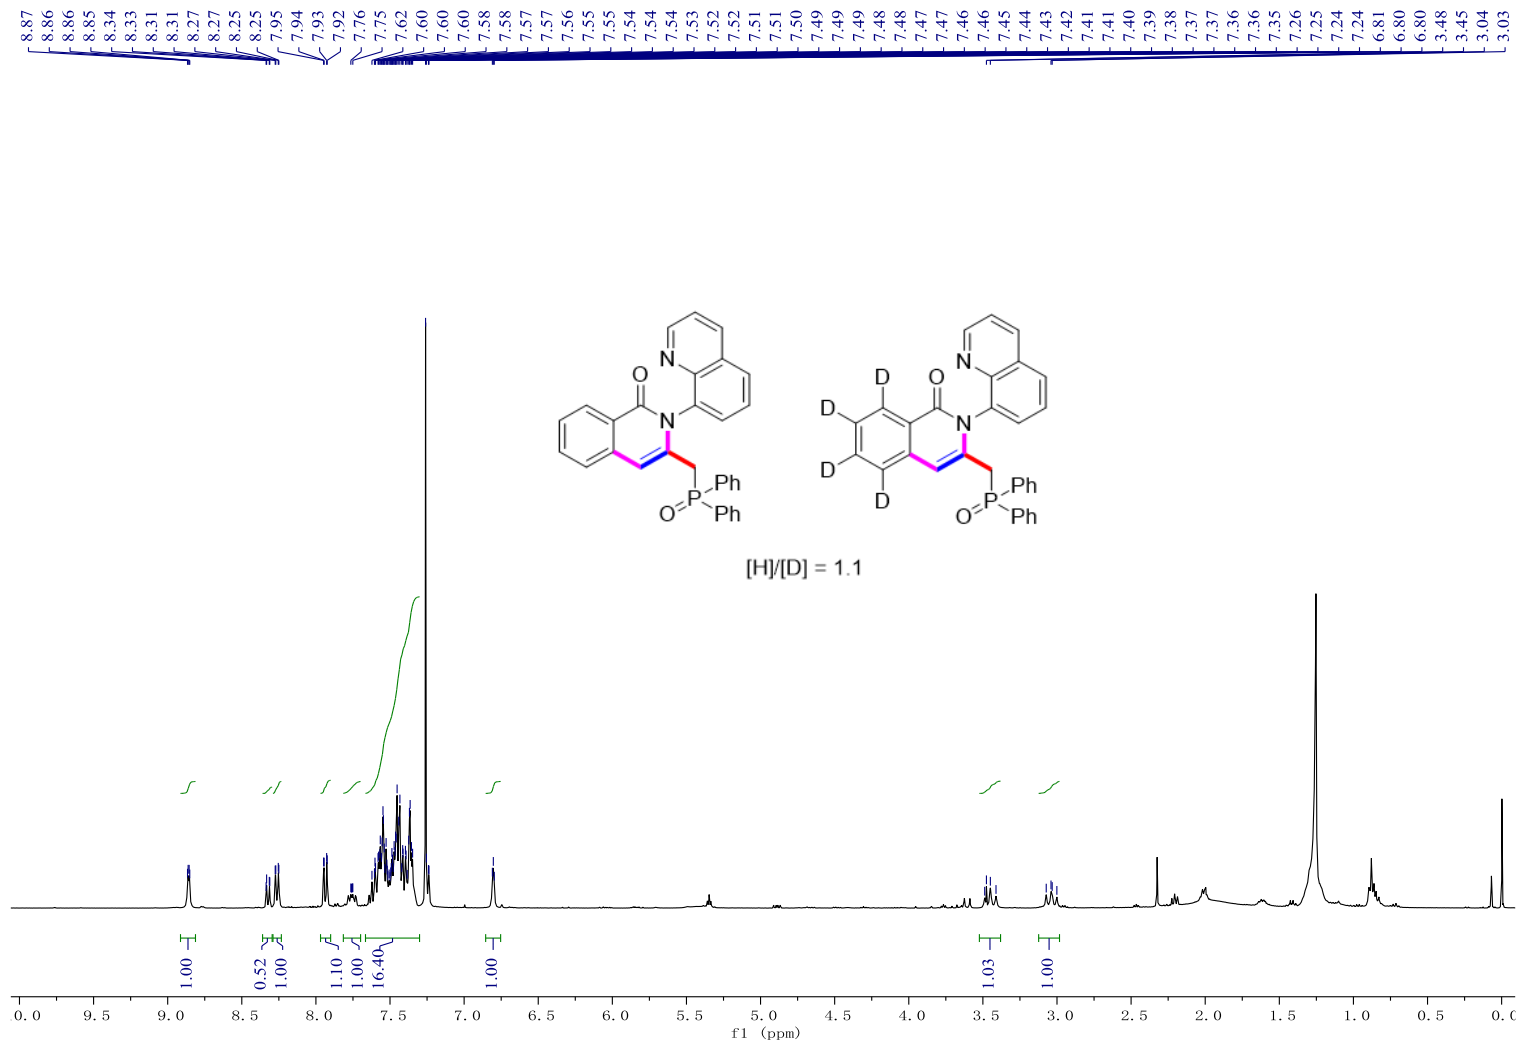

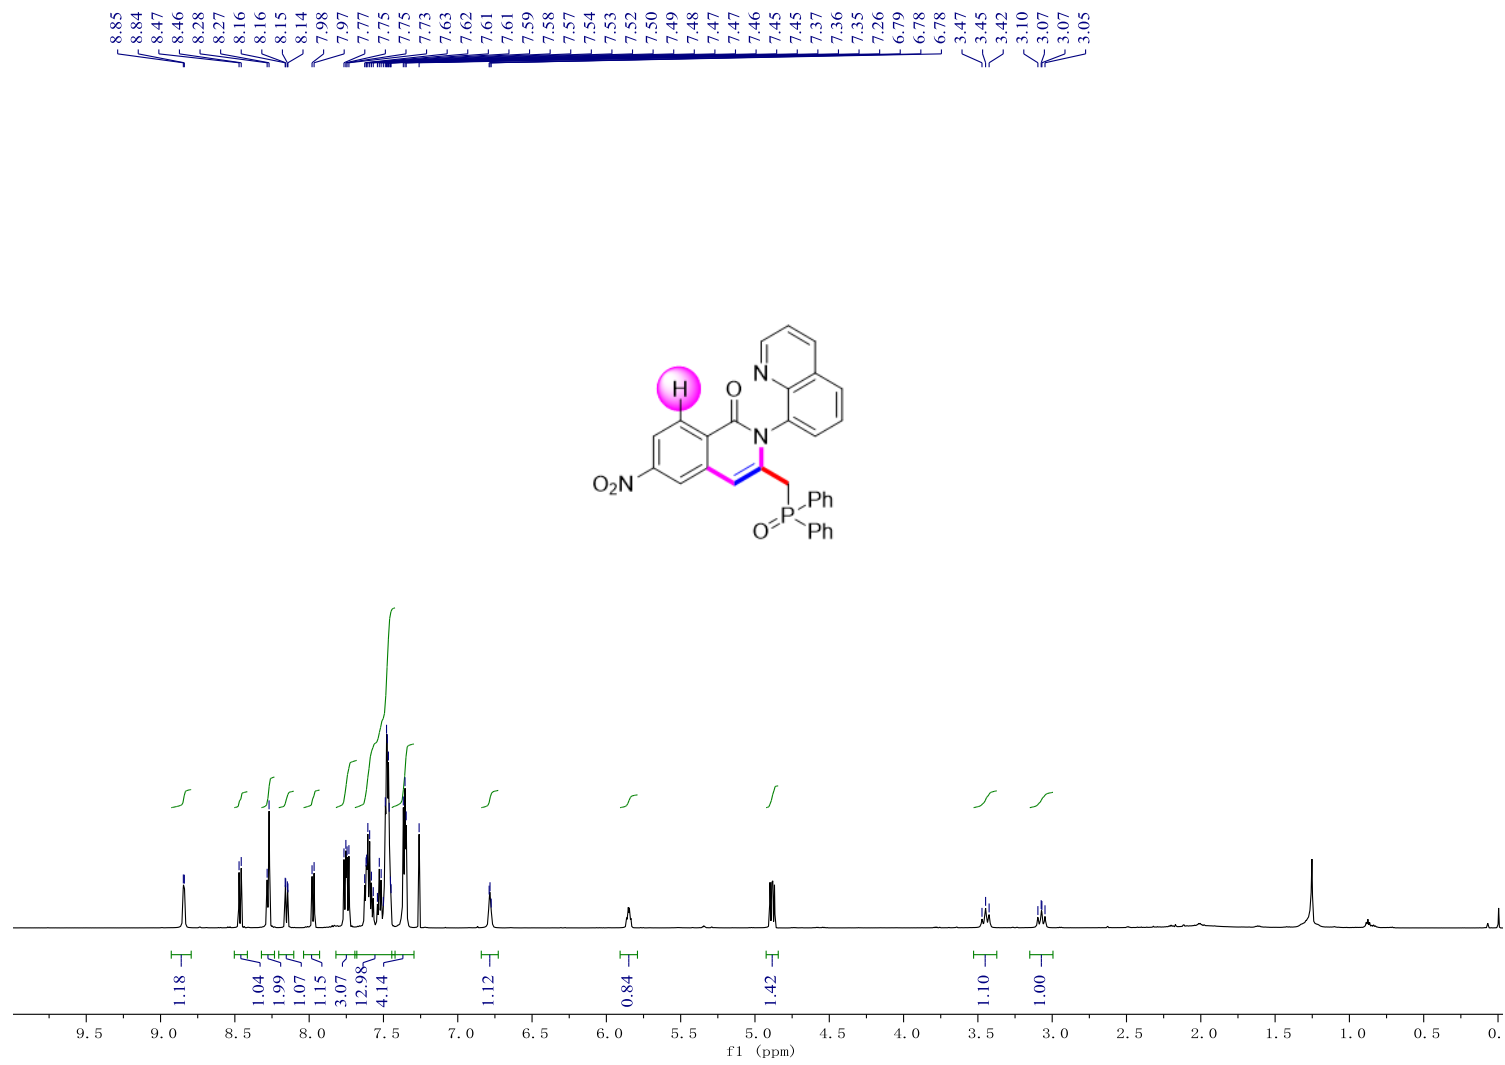

Supplement: d0qo01127d1.pdf [file d0qo01127d1.pdf]
